# Supplementary material for: Knockout of the HvCKX1 or HvCKX3 Gene in Barley (Hordeum vulgare L.) by RNA-Guided Cas9 Nuclease Affects the Regulation of Cytokinin Metabolism and Root Morphology
Source: Cells. 2019 Jul 26;8(8):782. doi: 10.3390/cells8080782 (PMC6721474; doi:10.3390/cells8080782)
Supplement: Supplementary file 1 [file cells-08-00782-s001.zip]

Archive with 4 entries (4 files):
- Supplementary tables.pdf
- File_S1.xlsx
- File_S2.xlsx
- Supplementary figures.pdf
