# Supplementary material for: Knockout of the HvCKX1 or HvCKX3 Gene in Barley (Hordeum vulgare L.) by RNA-Guided Cas9 Nuclease Affects the Regulation of Cytokinin Metabolism and Root Morphology
Source: Cells. 2019 Jul 26;8(8):782. doi: 10.3390/cells8080782 (PMC6721474; doi:10.3390/cells8080782)
Supplement: Supplementary file 1 [file cells-08-00782-s001.zip › File_S1.xlsx]

## Sheet: C1-22_7DAP_upregulated
List of upregulated genes identified in 7DAP spikes of ckx1 mutant line C1-22. Functional annotation was performed using Mercator sequence annotation tool.
BINCODE	NAME	IDENTIFIER	Log2 fold change	P value	DESCRIPTION
'1.1.1.1'	'PS.lightreaction.photosystem II.LHC-II'	HORVU2Hr1G040780,6	10.1306	5.55218e-77	'(p27523|cb23_horvu : 516.0) Chlorophyll a-b binding protein of LHCII type III, chloroplast precursor (CAB) - Hordeum vulgare (Barley) & (loc_os07g37550.1 : 447.0) no description available & (at5g54270 : 439.0) Lhcb3 protein is a component of the main light harvesting chlorophyll a/b-protein complex of Photosystem II (LHC II).; light-harvesting chlorophyll B-binding protein 3 (LHCB3); FUNCTIONS I…
'1.1.2.2'	'PS.lightreaction.photosystem I.PSI polypeptide subunits'	HORVU5Hr1G005480,1	9.91886	1.60505e-212	'(atcg01060 : 129.0) Encodes the PsaC subunit of photosystem I.; PSAC; FUNCTIONS IN: 4 iron, 4 sulfur cluster binding, electron carrier activity, iron-sulfur cluster binding; INVOLVED IN: photosynthesis; LOCATED IN: chloroplast stromal thylakoid, chloroplast thylakoid membrane, photosystem I, chloroplast, membrane; EXPRESSED IN: 23 plant structures; EXPRESSED DURING: 13 growth stages; CONTAINS In…
'1.1.30'	'PS.lightreaction.state transition'	HORVU2Hr1G075030,5	9.89633	2.49996e-118	'(loc_os04g35080.1 : 194.0) no description available & (at4g02630 : 101.0) Protein kinase superfamily protein; FUNCTIONS IN: protein serine/threonine kinase activity, protein kinase activity, kinase activity, ATP binding; INVOLVED IN: protein amino acid phosphorylation; LOCATED IN: plasma membrane; EXPRESSED IN: 22 plant structures; EXPRESSED DURING: 13 growth stages; CONTAINS InterPro DOMAIN/s: …
'2.1.2.1'	'major CHO metabolism.synthesis.starch.AGPase'	HORVU0Hr1G015930,2	10.584	3.18212e-189	'(p30524|glgl1_horvu : 468.0) Glucose-1-phosphate adenylyltransferase large subunit 1, chloroplast precursor (EC 2.7.7.27) (ADP-glucose synthase) (ADP-glucose pyrophosphorylase) (AGPase S) (Alpha-D-glucose-1-phosphate adenyl transferase) (BEPL) - Hordeum vulgare (B & (loc_os05g50380.2 : 404.0) no description available & (at2g21590 : 227.0) Encodes the large subunit of ADP-glucose pyrophosphorylas…
'2.1.2.1'	'major CHO metabolism.synthesis.starch.AGPase'	HORVU0Hr1G038120,2	11.4445	9.09832e-171	'(p30524|glgl1_horvu : 1055.0) Glucose-1-phosphate adenylyltransferase large subunit 1, chloroplast precursor (EC 2.7.7.27) (ADP-glucose synthase) (ADP-glucose pyrophosphorylase) (AGPase S) (Alpha-D-glucose-1-phosphate adenyl transferase) (BEPL) - Hordeum vulgare (B & (loc_os05g50380.1 : 955.0) no description available & (at1g27680 : 646.0) ADP-glucose pyrophosphorylase catalyzes the first, rate …
'2.1.2.1'	'major CHO metabolism.synthesis.starch.AGPase'	HORVU1Hr1G018540,3	10.5362	1.86325e-173	'(p30524|glgl1_horvu : 1055.0) Glucose-1-phosphate adenylyltransferase large subunit 1, chloroplast precursor (EC 2.7.7.27) (ADP-glucose synthase) (ADP-glucose pyrophosphorylase) (AGPase S) (Alpha-D-glucose-1-phosphate adenyl transferase) (BEPL) - Hordeum vulgare (B & (loc_os05g50380.1 : 955.0) no description available & (at1g27680 : 646.0) ADP-glucose pyrophosphorylase catalyzes the first, rate …
'2.1.2.1'	'major CHO metabolism.synthesis.starch.AGPase'	HORVU1Hr1G032190,4	10.6883	3.1262e-85	'(p30524|glgl1_horvu : 1055.0) Glucose-1-phosphate adenylyltransferase large subunit 1, chloroplast precursor (EC 2.7.7.27) (ADP-glucose synthase) (ADP-glucose pyrophosphorylase) (AGPase S) (Alpha-D-glucose-1-phosphate adenyl transferase) (BEPL) - Hordeum vulgare (B & (loc_os05g50380.1 : 955.0) no description available & (at1g27680 : 646.0) ADP-glucose pyrophosphorylase catalyzes the first, rate …
'2.1.2.1'	'major CHO metabolism.synthesis.starch.AGPase'	HORVU1Hr1G046870,4	10.952	3.35894e-215	'(p30524|glgl1_horvu : 1055.0) Glucose-1-phosphate adenylyltransferase large subunit 1, chloroplast precursor (EC 2.7.7.27) (ADP-glucose synthase) (ADP-glucose pyrophosphorylase) (AGPase S) (Alpha-D-glucose-1-phosphate adenyl transferase) (BEPL) - Hordeum vulgare (B & (loc_os05g50380.1 : 955.0) no description available & (at1g27680 : 646.0) ADP-glucose pyrophosphorylase catalyzes the first, rate …
'2.1.2.1'	'major CHO metabolism.synthesis.starch.AGPase'	HORVU1Hr1G072780,3	11.2438	0	'(p30524|glgl1_horvu : 701.0) Glucose-1-phosphate adenylyltransferase large subunit 1, chloroplast precursor (EC 2.7.7.27) (ADP-glucose synthase) (ADP-glucose pyrophosphorylase) (AGPase S) (Alpha-D-glucose-1-phosphate adenyl transferase) (BEPL) - Hordeum vulgare (B & (loc_os05g50380.1 : 662.0) no description available & (at1g27680 : 501.0) ADP-glucose pyrophosphorylase catalyzes the first, rate l…
'2.1.2.1'	'major CHO metabolism.synthesis.starch.AGPase'	HORVU1Hr1G080320,4	10.8218	1.68914e-225	'(p30524|glgl1_horvu : 1045.0) Glucose-1-phosphate adenylyltransferase large subunit 1, chloroplast precursor (EC 2.7.7.27) (ADP-glucose synthase) (ADP-glucose pyrophosphorylase) (AGPase S) (Alpha-D-glucose-1-phosphate adenyl transferase) (BEPL) - Hordeum vulgare (B & (loc_os05g50380.1 : 946.0) no description available & (at1g27680 : 637.0) ADP-glucose pyrophosphorylase catalyzes the first, rate …
'2.1.2.1'	'major CHO metabolism.synthesis.starch.AGPase'	HORVU1Hr1G084970,5	10.3276	1.36138e-244	'(p30524|glgl1_horvu : 488.0) Glucose-1-phosphate adenylyltransferase large subunit 1, chloroplast precursor (EC 2.7.7.27) (ADP-glucose synthase) (ADP-glucose pyrophosphorylase) (AGPase S) (Alpha-D-glucose-1-phosphate adenyl transferase) (BEPL) - Hordeum vulgare (B & (loc_os05g50380.1 : 458.0) no description available & (at1g27680 : 357.0) ADP-glucose pyrophosphorylase catalyzes the first, rate l…
'2.1.2.1'	'major CHO metabolism.synthesis.starch.AGPase'	HORVU1Hr1G086890,6	11.2174	2.48572e-237	'(p30524|glgl1_horvu : 1050.0) Glucose-1-phosphate adenylyltransferase large subunit 1, chloroplast precursor (EC 2.7.7.27) (ADP-glucose synthase) (ADP-glucose pyrophosphorylase) (AGPase S) (Alpha-D-glucose-1-phosphate adenyl transferase) (BEPL) - Hordeum vulgare (B & (loc_os05g50380.1 : 950.0) no description available & (at1g27680 : 642.0) ADP-glucose pyrophosphorylase catalyzes the first, rate …
'2.1.2.1'	'major CHO metabolism.synthesis.starch.AGPase'	HORVU1Hr1G091600,12	10.2336	1.39411e-243	'(p30524|glgl1_horvu : 607.0) Glucose-1-phosphate adenylyltransferase large subunit 1, chloroplast precursor (EC 2.7.7.27) (ADP-glucose synthase) (ADP-glucose pyrophosphorylase) (AGPase S) (Alpha-D-glucose-1-phosphate adenyl transferase) (BEPL) - Hordeum vulgare (B & (loc_os05g50380.1 : 571.0) no description available & (at1g27680 : 444.0) ADP-glucose pyrophosphorylase catalyzes the first, rate l…
'2.1.2.1'	'major CHO metabolism.synthesis.starch.AGPase'	HORVU2Hr1G004170,4	10.3805	2.197e-53	'(p12299|glgl2_wheat : 490.0) Glucose-1-phosphate adenylyltransferase large subunit, chloroplast precursor (EC 2.7.7.27) (ADP-glucose synthase) (ADP-glucose pyrophosphorylase) (AGPase S) (Alpha-D-glucose-1-phosphate adenyl transferase) - Triticum aestivum (Wheat) & (loc_os05g50380.1 : 457.0) no description available & (at1g27680 : 352.0) ADP-glucose pyrophosphorylase catalyzes the first, rate lim…
'2.1.2.1'	'major CHO metabolism.synthesis.starch.AGPase'	HORVU2Hr1G025530,3	11.412	5.88198e-205	'(p30524|glgl1_horvu : 469.0) Glucose-1-phosphate adenylyltransferase large subunit 1, chloroplast precursor (EC 2.7.7.27) (ADP-glucose synthase) (ADP-glucose pyrophosphorylase) (AGPase S) (Alpha-D-glucose-1-phosphate adenyl transferase) (BEPL) - Hordeum vulgare (B & (loc_os05g50380.1 : 405.0) no description available & (at2g21590 : 228.0) Encodes the large subunit of ADP-glucose pyrophosphorylas…
'2.1.2.1'	'major CHO metabolism.synthesis.starch.AGPase'	HORVU2Hr1G036680,1	10.9374	0	'(p30524|glgl1_horvu : 1050.0) Glucose-1-phosphate adenylyltransferase large subunit 1, chloroplast precursor (EC 2.7.7.27) (ADP-glucose synthase) (ADP-glucose pyrophosphorylase) (AGPase S) (Alpha-D-glucose-1-phosphate adenyl transferase) (BEPL) - Hordeum vulgare (B & (loc_os05g50380.1 : 950.0) no description available & (at1g27680 : 642.0) ADP-glucose pyrophosphorylase catalyzes the first, rate …
'2.1.2.1'	'major CHO metabolism.synthesis.starch.AGPase'	HORVU2Hr1G079300,1	10.3565	4.0736e-141	'(p30524|glgl1_horvu : 1055.0) Glucose-1-phosphate adenylyltransferase large subunit 1, chloroplast precursor (EC 2.7.7.27) (ADP-glucose synthase) (ADP-glucose pyrophosphorylase) (AGPase S) (Alpha-D-glucose-1-phosphate adenyl transferase) (BEPL) - Hordeum vulgare (B & (loc_os05g50380.1 : 955.0) no description available & (at1g27680 : 646.0) ADP-glucose pyrophosphorylase catalyzes the first, rate …
'2.1.2.1'	'major CHO metabolism.synthesis.starch.AGPase'	HORVU2Hr1G080140,4	10.7665	0	'(p30524|glgl1_horvu : 950.0) Glucose-1-phosphate adenylyltransferase large subunit 1, chloroplast precursor (EC 2.7.7.27) (ADP-glucose synthase) (ADP-glucose pyrophosphorylase) (AGPase S) (Alpha-D-glucose-1-phosphate adenyl transferase) (BEPL) - Hordeum vulgare (B & (loc_os05g50380.1 : 863.0) no description available & (at1g27680 : 572.0) ADP-glucose pyrophosphorylase catalyzes the first, rate l…
'2.1.2.1'	'major CHO metabolism.synthesis.starch.AGPase'	HORVU2Hr1G099480,31	10.3608	9.65108e-168	'(p30524|glgl1_horvu : 950.0) Glucose-1-phosphate adenylyltransferase large subunit 1, chloroplast precursor (EC 2.7.7.27) (ADP-glucose synthase) (ADP-glucose pyrophosphorylase) (AGPase S) (Alpha-D-glucose-1-phosphate adenyl transferase) (BEPL) - Hordeum vulgare (B & (loc_os05g50380.1 : 863.0) no description available & (at1g27680 : 572.0) ADP-glucose pyrophosphorylase catalyzes the first, rate l…
'2.1.2.1'	'major CHO metabolism.synthesis.starch.AGPase'	HORVU2Hr1G115700,8	10.5401	5.80314e-123	'(p30524|glgl1_horvu : 568.0) Glucose-1-phosphate adenylyltransferase large subunit 1, chloroplast precursor (EC 2.7.7.27) (ADP-glucose synthase) (ADP-glucose pyrophosphorylase) (AGPase S) (Alpha-D-glucose-1-phosphate adenyl transferase) (BEPL) - Hordeum vulgare (B & (loc_os05g50380.1 : 537.0) no description available & (at1g27680 : 418.0) ADP-glucose pyrophosphorylase catalyzes the first, rate l…
'2.1.2.1'	'major CHO metabolism.synthesis.starch.AGPase'	HORVU2Hr1G126730,3	10.4388	6.62642e-258	'(p12299|glgl2_wheat : 494.0) Glucose-1-phosphate adenylyltransferase large subunit, chloroplast precursor (EC 2.7.7.27) (ADP-glucose synthase) (ADP-glucose pyrophosphorylase) (AGPase S) (Alpha-D-glucose-1-phosphate adenyl transferase) - Triticum aestivum (Wheat) & (loc_os05g50380.1 : 462.0) no description available & (at1g27680 : 357.0) ADP-glucose pyrophosphorylase catalyzes the first, rate lim…
'2.1.2.2'	'major CHO metabolism.synthesis.starch.starch synthase'	HORVU1Hr1G080950,20	9.98868	5.03464e-122	'(loc_os05g45720.4 : 592.0) no description available & (at4g18240 : 325.0) starch synthase 4 (SS4); FUNCTIONS IN: transferase activity, transferring glycosyl groups; INVOLVED IN: starch metabolic process; LOCATED IN: chloroplast; EXPRESSED IN: 24 plant structures; EXPRESSED DURING: 13 growth stages; CONTAINS InterPro DOMAIN/s: Glycogen/starch synthases, ADP-glucose type (InterPro:IPR011835), Star…
'2.1.2.3'	'major CHO metabolism.synthesis.starch.starch branching'	HORVU2Hr1G071570,37	11.5078	0	'(q08047|glgb_maize : 1104.0) 1,4-alpha-glucan branching enzyme IIB, chloroplast precursor (EC 2.4.1.18) (Starch branching enzyme IIB) (Q-enzyme) - Zea mays (Maize) & (loc_os02g32660.1 : 1101.0) no description available & (at5g03650 : 1076.0) Encodes starch branching enzyme (E.C.2.4.1.18) similar to SBE2 from maize and rice. Expressed throughout the plant and highest in seedlings and cauline leav…
'2.1.2.3'	'major CHO metabolism.synthesis.starch.starch branching'	HORVU2Hr1G071570,9	10.8424	8.37008e-188	'(q08047|glgb_maize : 1104.0) 1,4-alpha-glucan branching enzyme IIB, chloroplast precursor (EC 2.4.1.18) (Starch branching enzyme IIB) (Q-enzyme) - Zea mays (Maize) & (loc_os02g32660.1 : 1101.0) no description available & (at5g03650 : 1076.0) Encodes starch branching enzyme (E.C.2.4.1.18) similar to SBE2 from maize and rice. Expressed throughout the plant and highest in seedlings and cauline leav…
'2.1.2.3'	'major CHO metabolism.synthesis.starch.starch branching'	HORVU2Hr1G072500,31	11.823	0	'(q08047|glgb_maize : 1010.0) 1,4-alpha-glucan branching enzyme IIB, chloroplast precursor (EC 2.4.1.18) (Starch branching enzyme IIB) (Q-enzyme) - Zea mays (Maize) & (loc_os02g32660.1 : 1006.0) no description available & (at5g03650 : 966.0) Encodes starch branching enzyme (E.C.2.4.1.18) similar to SBE2 from maize and rice. Expressed throughout the plant and highest in seedlings and cauline leave…
'2.2.1.3.2'	'major CHO metabolism.degradation.sucrose.invertases.cell wall'	HORVU1Hr1G012470,8	10.8218	2.7147e-155	'(p49174|inva_maize : 260.0) Beta-fructofuranosidase, cell wall isozyme precursor (EC 3.2.1.26) (Sucrose hydrolase) (Invertase) - Zea mays (Maize) & (loc_os02g33110.1 : 239.0) no description available & (at3g52600 : 182.0) cell wall invertase 2 (CWINV2); FUNCTIONS IN: hydrolase activity, hydrolyzing O-glycosyl compounds; INVOLVED IN: carbohydrate metabolic process; EXPRESSED IN: 9 plant structure…
'2.2.1.3.2'	'major CHO metabolism.degradation.sucrose.invertases.cell wall'	HORVU1Hr1G017710,3	11.3842	7.72646e-262	'(q6eu76|inv1_orysa : 616.0) Beta-fructofuranosidase, insoluble isoenzyme 1 precursor (EC 3.2.1.26) (Sucrose hydrolase 1) (Invertase 1) (Cell wall beta-fructosidase 1) (OsCIN1) - Oryza sativa (Rice) & (loc_os02g33110.2 : 616.0) no description available & (at2g36190 : 456.0) cwINV4 appears to function as a cell wall-localized invertase (that can catalyze the hydrolysis of sucrose into fructose and…
'2.2.1.3.2'	'major CHO metabolism.degradation.sucrose.invertases.cell wall'	HORVU1Hr1G022400,3	11.1523	3.44288e-87	'(q6eu76|inv1_orysa : 578.0) Beta-fructofuranosidase, insoluble isoenzyme 1 precursor (EC 3.2.1.26) (Sucrose hydrolase 1) (Invertase 1) (Cell wall beta-fructosidase 1) (OsCIN1) - Oryza sativa (Rice) & (loc_os02g33110.2 : 578.0) no description available & (at3g52600 : 434.0) cell wall invertase 2 (CWINV2); FUNCTIONS IN: hydrolase activity, hydrolyzing O-glycosyl compounds; INVOLVED IN: carbohydrat…
'2.2.1.3.2'	'major CHO metabolism.degradation.sucrose.invertases.cell wall'	HORVU1Hr1G036640,23	10.5953	2.53828e-106	'(p49174|inva_maize : 567.0) Beta-fructofuranosidase, cell wall isozyme precursor (EC 3.2.1.26) (Sucrose hydrolase) (Invertase) - Zea mays (Maize) & (loc_os02g33110.1 : 564.0) no description available & (at3g52600 : 421.0) cell wall invertase 2 (CWINV2); FUNCTIONS IN: hydrolase activity, hydrolyzing O-glycosyl compounds; INVOLVED IN: carbohydrate metabolic process; EXPRESSED IN: 9 plant structure…
'2.2.1.3.2'	'major CHO metabolism.degradation.sucrose.invertases.cell wall'	HORVU1Hr1G041820,2	10.3049	7.61364e-121	'(q6eu76|inv1_orysa : 811.0) Beta-fructofuranosidase, insoluble isoenzyme 1 precursor (EC 3.2.1.26) (Sucrose hydrolase 1) (Invertase 1) (Cell wall beta-fructosidase 1) (OsCIN1) - Oryza sativa (Rice) & (loc_os02g33110.1 : 811.0) no description available & (at3g52600 : 593.0) cell wall invertase 2 (CWINV2); FUNCTIONS IN: hydrolase activity, hydrolyzing O-glycosyl compounds; INVOLVED IN: carbohydrat…
'2.2.1.3.2'	'major CHO metabolism.degradation.sucrose.invertases.cell wall'	HORVU1Hr1G073500,1	11.1	0	'(p49174|inva_maize : 167.0) Beta-fructofuranosidase, cell wall isozyme precursor (EC 3.2.1.26) (Sucrose hydrolase) (Invertase) - Zea mays (Maize) & (loc_os02g33110.2 : 150.0) no description available & (at3g52600 : 114.0) cell wall invertase 2 (CWINV2); FUNCTIONS IN: hydrolase activity, hydrolyzing O-glycosyl compounds; INVOLVED IN: carbohydrate metabolic process; EXPRESSED IN: 9 plant structure…
'2.2.1.3.2'	'major CHO metabolism.degradation.sucrose.invertases.cell wall'	HORVU2Hr1G010380,6	10.9084	0	'(q6eu76|inv1_orysa : 811.0) Beta-fructofuranosidase, insoluble isoenzyme 1 precursor (EC 3.2.1.26) (Sucrose hydrolase 1) (Invertase 1) (Cell wall beta-fructosidase 1) (OsCIN1) - Oryza sativa (Rice) & (loc_os02g33110.1 : 811.0) no description available & (at3g52600 : 593.0) cell wall invertase 2 (CWINV2); FUNCTIONS IN: hydrolase activity, hydrolyzing O-glycosyl compounds; INVOLVED IN: carbohydrat…
'2.2.1.3.2'	'major CHO metabolism.degradation.sucrose.invertases.cell wall'	HORVU2Hr1G019660,5	10.7134	1.62691e-121	'(q6eu76|inv1_orysa : 796.0) Beta-fructofuranosidase, insoluble isoenzyme 1 precursor (EC 3.2.1.26) (Sucrose hydrolase 1) (Invertase 1) (Cell wall beta-fructosidase 1) (OsCIN1) - Oryza sativa (Rice) & (loc_os02g33110.1 : 796.0) no description available & (at3g52600 : 578.0) cell wall invertase 2 (CWINV2); FUNCTIONS IN: hydrolase activity, hydrolyzing O-glycosyl compounds; INVOLVED IN: carbohydrat…
'2.2.1.3.2'	'major CHO metabolism.degradation.sucrose.invertases.cell wall'	HORVU2Hr1G102800,7	10.3174	1.93234e-49	'(p49174|inva_maize : 129.0) Beta-fructofuranosidase, cell wall isozyme precursor (EC 3.2.1.26) (Sucrose hydrolase) (Invertase) - Zea mays (Maize) & (loc_os04g33740.1 : 118.0) no description available & (at3g52600 : 93.6) cell wall invertase 2 (CWINV2); FUNCTIONS IN: hydrolase activity, hydrolyzing O-glycosyl compounds; INVOLVED IN: carbohydrate metabolic process; EXPRESSED IN: 9 plant structures…
'2.2.1.3.2'	'major CHO metabolism.degradation.sucrose.invertases.cell wall'	HORVU2Hr1G105380,4	11.4594	4.22648e-210	'(p49174|inva_maize : 254.0) Beta-fructofuranosidase, cell wall isozyme precursor (EC 3.2.1.26) (Sucrose hydrolase) (Invertase) - Zea mays (Maize) & (loc_os02g33110.1 : 233.0) no description available & (at3g52600 : 178.0) cell wall invertase 2 (CWINV2); FUNCTIONS IN: hydrolase activity, hydrolyzing O-glycosyl compounds; INVOLVED IN: carbohydrate metabolic process; EXPRESSED IN: 9 plant structure…
'2.2.1.4'	'major CHO metabolism.degradation.sucrose.hexokinase'	HORVU1Hr1G075680,3	9.99577	9.07628e-53	'(q5w676|hxk5_orysa : 598.0) Hexokinase-5 (EC 2.7.1.1) (Hexokinase I) - Oryza sativa (Rice) & (loc_os05g44760.1 : 598.0) no description available & (at4g29130 : 455.0) Encodes a hexokinase (HXK1) in the plant glucose-signaling network. Functions as a glucose sensor to interrelate nutrient, light, and hormone signaling networks for controlling growth and development in response to the changing env…
'2.2.1.4'	'major CHO metabolism.degradation.sucrose.hexokinase'	HORVU3Hr1G105380,5	9.8392	4.75562e-204	'(q2knb4|hxk3_orysa : 431.0) Hexokinase-3 (EC 2.7.1.1) (Hexokinase-8) - Oryza sativa (Rice) & (loc_os01g71320.1 : 431.0) no description available & (at1g50460 : 329.0) hexokinase-like 1 (HKL1); FUNCTIONS IN: hexokinase activity, ATP binding; INVOLVED IN: response to salt stress, response to cold, response to osmotic stress; LOCATED IN: mitochondrion, plastid; EXPRESSED IN: 26 plant structures; EX…
'2.2.2.1'	'major CHO metabolism.degradation.starch.starch cleavage'	HORVU1Hr1G057330,20	11.5469	0	'(loc_os07g23880.1 : 1684.0) no description available & (at3g23640 : 1306.0) heteroglycan glucosidase 1 (HGL1); FUNCTIONS IN: hydrolase activity, hydrolyzing O-glycosyl compounds; INVOLVED IN: carbohydrate metabolic process; LOCATED IN: chloroplast; EXPRESSED IN: 22 plant structures; EXPRESSED DURING: 13 growth stages; CONTAINS InterPro DOMAIN/s: Glycoside hydrolase, family 31 (InterPro:IPR000322…
'2.2.2.1'	'major CHO metabolism.degradation.starch.starch cleavage'	HORVU1Hr1G057330,19	9.8857	7.3412e-201	'(loc_os07g23880.1 : 1008.0) no description available & (at3g23640 : 776.0) heteroglycan glucosidase 1 (HGL1); FUNCTIONS IN: hydrolase activity, hydrolyzing O-glycosyl compounds; INVOLVED IN: carbohydrate metabolic process; LOCATED IN: chloroplast; EXPRESSED IN: 22 plant structures; EXPRESSED DURING: 13 growth stages; CONTAINS InterPro DOMAIN/s: Glycoside hydrolase, family 31 (InterPro:IPR000322)…
'2.2.2.3'	'major CHO metabolism.degradation.starch.glucan water dikinase'	HORVU7Hr1G048330,45	9.81378	5.27928e-116	'(loc_os06g30310.1 : 2087.0) no description available & (q9awa5|gwd1_soltu : 1884.0) Alpha-glucan water dikinase, chloroplast precursor (EC 2.7.9.4) (EC 2.7.13.3) (Starch-related R1 protein) - Solanum tuberosum (Potato) & (at1g10760 : 1644.0) Encodes an &#945;-glucan, water dikinase required for starch degradation. Involved in cold-induced freezing tolerance. Mutations that eliminate the GWD prot…
'2.2.2.8'	'major CHO metabolism.degradation.starch.ISA3'	HORVU5Hr1G070160,25	9.8009	4.02388e-118	'(at4g09020 : 1106.0) Encodes an isoamylase-like protein. Mutant studies show that the gene is strongly involved in starch breakdown. A GUS-protein fusion product was shown to localize to the surface of chloroplastic structures reminiscent of starch granules. In the mutants, the chloroplastic &#945;-amylase AMY3 is upregulated.; isoamylase 3 (ISA3); FUNCTIONS IN: isoamylase activity, alpha-amylas…
'3.5'	'minor CHO metabolism.others'	HORVU0Hr1G040540,12	10.8978	2.15032e-79	'(loc_os04g38540.1 : 542.0) no description available & (at5g15140 : 305.0) Galactose mutarotase-like superfamily protein; FUNCTIONS IN: aldose 1-epimerase activity; INVOLVED IN: galactose metabolic process, hexose metabolic process, carbohydrate metabolic process; LOCATED IN: endomembrane system; EXPRESSED IN: 11 plant structures; EXPRESSED DURING: 7 growth stages; CONTAINS InterPro DOMAIN/s: Gly…
'3.5'	'minor CHO metabolism.others'	HORVU1Hr1G000020,2	10.4828	1.0124e-77	'(q6eu76|inv1_orysa : 811.0) Beta-fructofuranosidase, insoluble isoenzyme 1 precursor (EC 3.2.1.26) (Sucrose hydrolase 1) (Invertase 1) (Cell wall beta-fructosidase 1) (OsCIN1) - Oryza sativa (Rice) & (loc_os02g33110.1 : 811.0) no description available & (at3g52600 : 593.0) cell wall invertase 2 (CWINV2); FUNCTIONS IN: hydrolase activity, hydrolyzing O-glycosyl compounds; INVOLVED IN: carbohydrat…
'3.5'	'minor CHO metabolism.others'	HORVU1Hr1G018740,2	10.6987	0	'(loc_os04g38540.1 : 595.0) no description available & (at5g15140 : 346.0) Galactose mutarotase-like superfamily protein; FUNCTIONS IN: aldose 1-epimerase activity; INVOLVED IN: galactose metabolic process, hexose metabolic process, carbohydrate metabolic process; LOCATED IN: endomembrane system; EXPRESSED IN: 11 plant structures; EXPRESSED DURING: 7 growth stages; CONTAINS InterPro DOMAIN/s: Gly…
'3.5'	'minor CHO metabolism.others'	HORVU1Hr1G023100,2	10.4126	8.24956e-289	'(p49174|inva_maize : 260.0) Beta-fructofuranosidase, cell wall isozyme precursor (EC 3.2.1.26) (Sucrose hydrolase) (Invertase) - Zea mays (Maize) & (loc_os02g33110.1 : 239.0) no description available & (at3g52600 : 182.0) cell wall invertase 2 (CWINV2); FUNCTIONS IN: hydrolase activity, hydrolyzing O-glycosyl compounds; INVOLVED IN: carbohydrate metabolic process; EXPRESSED IN: 9 plant structure…
'3.5'	'minor CHO metabolism.others'	HORVU1Hr1G044930,6	10.4242	0	'(loc_os04g38540.2 : 513.0) no description available & (at5g15140 : 291.0) Galactose mutarotase-like superfamily protein; FUNCTIONS IN: aldose 1-epimerase activity; INVOLVED IN: galactose metabolic process, hexose metabolic process, carbohydrate metabolic process; LOCATED IN: endomembrane system; EXPRESSED IN: 11 plant structures; EXPRESSED DURING: 7 growth stages; CONTAINS InterPro DOMAIN/s: Gly…
'3.5'	'minor CHO metabolism.others'	HORVU1Hr1G070230,7	10.6357	1.76218e-160	'(p49174|inva_maize : 254.0) Beta-fructofuranosidase, cell wall isozyme precursor (EC 3.2.1.26) (Sucrose hydrolase) (Invertase) - Zea mays (Maize) & (loc_os02g33110.1 : 233.0) no description available & (at3g52600 : 178.0) cell wall invertase 2 (CWINV2); FUNCTIONS IN: hydrolase activity, hydrolyzing O-glycosyl compounds; INVOLVED IN: carbohydrate metabolic process; EXPRESSED IN: 9 plant structure…
'3.5'	'minor CHO metabolism.others'	HORVU1Hr1G072490,10	10.3487	1.25307e-75	'(p49174|inva_maize : 567.0) Beta-fructofuranosidase, cell wall isozyme precursor (EC 3.2.1.26) (Sucrose hydrolase) (Invertase) - Zea mays (Maize) & (loc_os02g33110.1 : 564.0) no description available & (at3g52600 : 421.0) cell wall invertase 2 (CWINV2); FUNCTIONS IN: hydrolase activity, hydrolyzing O-glycosyl compounds; INVOLVED IN: carbohydrate metabolic process; EXPRESSED IN: 9 plant structure…
'3.5'	'minor CHO metabolism.others'	HORVU1Hr1G076880,3	10.3197	1.14061e-253	'(loc_os04g38540.1 : 234.0) no description available & (at5g15140 : 141.0) Galactose mutarotase-like superfamily protein; FUNCTIONS IN: aldose 1-epimerase activity; INVOLVED IN: galactose metabolic process, hexose metabolic process, carbohydrate metabolic process; LOCATED IN: endomembrane system; EXPRESSED IN: 11 plant structures; EXPRESSED DURING: 7 growth stages; CONTAINS InterPro DOMAIN/s: Gly…
'3.5'	'minor CHO metabolism.others'	HORVU1Hr1G087340,2	10.4168	1.6209e-244	'(loc_os04g38540.1 : 587.0) no description available & (at5g15140 : 338.0) Galactose mutarotase-like superfamily protein; FUNCTIONS IN: aldose 1-epimerase activity; INVOLVED IN: galactose metabolic process, hexose metabolic process, carbohydrate metabolic process; LOCATED IN: endomembrane system; EXPRESSED IN: 11 plant structures; EXPRESSED DURING: 7 growth stages; CONTAINS InterPro DOMAIN/s: Gly…
'3.5'	'minor CHO metabolism.others'	HORVU2Hr1G002050,6	10.2408	3.13566e-48	'(q6eu76|inv1_orysa : 796.0) Beta-fructofuranosidase, insoluble isoenzyme 1 precursor (EC 3.2.1.26) (Sucrose hydrolase 1) (Invertase 1) (Cell wall beta-fructosidase 1) (OsCIN1) - Oryza sativa (Rice) & (loc_os02g33110.1 : 796.0) no description available & (at3g52600 : 578.0) cell wall invertase 2 (CWINV2); FUNCTIONS IN: hydrolase activity, hydrolyzing O-glycosyl compounds; INVOLVED IN: carbohydrat…
'3.5'	'minor CHO metabolism.others'	HORVU2Hr1G012690,1	10.5878	0	'(loc_os04g38540.1 : 542.0) no description available & (at5g15140 : 305.0) Galactose mutarotase-like superfamily protein; FUNCTIONS IN: aldose 1-epimerase activity; INVOLVED IN: galactose metabolic process, hexose metabolic process, carbohydrate metabolic process; LOCATED IN: endomembrane system; EXPRESSED IN: 11 plant structures; EXPRESSED DURING: 7 growth stages; CONTAINS InterPro DOMAIN/s: Gly…
'3.5'	'minor CHO metabolism.others'	HORVU2Hr1G016250,18	10.5536	7.83918e-162	'(loc_os04g38540.2 : 513.0) no description available & (at5g15140 : 291.0) Galactose mutarotase-like superfamily protein; FUNCTIONS IN: aldose 1-epimerase activity; INVOLVED IN: galactose metabolic process, hexose metabolic process, carbohydrate metabolic process; LOCATED IN: endomembrane system; EXPRESSED IN: 11 plant structures; EXPRESSED DURING: 7 growth stages; CONTAINS InterPro DOMAIN/s: Gly…
'3.5'	'minor CHO metabolism.others'	HORVU3Hr1G000770,7	10.5953	4.7614e-263	'(q6eu76|inv1_orysa : 811.0) Beta-fructofuranosidase, insoluble isoenzyme 1 precursor (EC 3.2.1.26) (Sucrose hydrolase 1) (Invertase 1) (Cell wall beta-fructosidase 1) (OsCIN1) - Oryza sativa (Rice) & (loc_os02g33110.1 : 811.0) no description available & (at3g52600 : 593.0) cell wall invertase 2 (CWINV2); FUNCTIONS IN: hydrolase activity, hydrolyzing O-glycosyl compounds; INVOLVED IN: carbohydrat…
'3.8.2'	'minor CHO metabolism.galactose.alpha-galactosidases'	HORVU1Hr1G043820,12	10.0661	4.68112e-88	'(q9fxt4|agal_orysa : 481.0) Alpha-galactosidase precursor (EC 3.2.1.22) (Melibiase) (Alpha-D-galactoside galactohydrolase) - Oryza sativa (Rice) & (loc_os10g35110.2 : 481.0) no description available & (at5g08370 : 390.0) alpha-galactosidase 2 (AGAL2); FUNCTIONS IN: alpha-galactosidase activity, hydrolase activity, hydrolyzing O-glycosyl compounds, catalytic activity; INVOLVED IN: positive regula…
'4.1.5'	'glycolysis.cytosolic branch.pyrophosphate-fructose-6-P phosphotransferase'	HORVU7Hr1G040550,6	9.98157	2.8093e-206	'(loc_os06g13810.1 : 976.0) no description available & (at1g12000 : 888.0) Phosphofructokinase family protein; FUNCTIONS IN: diphosphate-fructose-6-phosphate 1-phosphotransferase activity; INVOLVED IN: response to cadmium ion, glycolysis, photosynthesis; LOCATED IN: pyrophosphate-dependent phosphofructokinase complex, beta-subunit complex, cell wall, membrane; EXPRESSED IN: 24 plant structures; E…
'4.2.14'	'glycolysis.plastid branch.pyruvate kinase (PK)'	HORVU2Hr1G050140,2	10.0498	5.88338e-77	'(loc_os07g08340.1 : 907.0) no description available & (q43117|kpya_ricco : 831.0) Pyruvate kinase isozyme A, chloroplast precursor (EC 2.7.1.40) - Ricinus communis (Castor bean) & (at3g22960 : 815.0) encodes a chloroplast pyruvate kinase alpha subunit. Important for seed oil biosynthesis. Ubiquitously expressed, with significantly increased expression in maturing seeds.; PKP-ALPHA; FUNCTIONS IN:…
'8.2.9'	'TCA / org transformation.other organic acid transformatons.cyt MDH'	HORVU7Hr1G060260,1	9.73471	3.41854e-27	'(loc_os08g44810.1 : 141.0) no description available & (p15719|mdhp_maize : 130.0) Malate dehydrogenase [NADP], chloroplast precursor (EC 1.1.1.82) (NADP-MDH) - Zea mays (Maize) & (at5g58330 : 114.0) lactate/malate dehydrogenase family protein; FUNCTIONS IN: in 6 functions; INVOLVED IN: in 6 processes; LOCATED IN: thylakoid, mitochondrion, apoplast, chloroplast; EXPRESSED IN: 23 plant structures;…
'9.1.1.5'	'mitochondrial electron transport / ATP synthesis.NADH-DH.complex I.carbonic anhydrase'	HORVU6Hr1G013800,5	10.9887	3.24582e-164	'(loc_os12g07220.1 : 406.0) no description available & (at1g47260 : 369.0) Encodes mitochondrial gamma carbonic anhydrase. Component of the NADH dehydrogenase complex.; gamma carbonic anhydrase 2 (GAMMA CA2); FUNCTIONS IN: carbonate dehydratase activity; INVOLVED IN: response to salt stress, regulation of oxygen and reactive oxygen species metabolic process, anther dehiscence, photorespiration; L…
'9.1.1.5'	'mitochondrial electron transport / ATP synthesis.NADH-DH.complex I.carbonic anhydrase'	HORVU7Hr1G007220,9	10.9129	5.41056e-162	'(loc_os12g07220.1 : 448.0) no description available & (at1g47260 : 394.0) Encodes mitochondrial gamma carbonic anhydrase. Component of the NADH dehydrogenase complex.; gamma carbonic anhydrase 2 (GAMMA CA2); FUNCTIONS IN: carbonate dehydratase activity; INVOLVED IN: response to salt stress, regulation of oxygen and reactive oxygen species metabolic process, anther dehiscence, photorespiration; L…
'9.1.1.5'	'mitochondrial electron transport / ATP synthesis.NADH-DH.complex I.carbonic anhydrase'	HORVU2Hr1G106850,3	10.363	3.39248e-135	'(loc_os12g07220.1 : 499.0) no description available & (at1g47260 : 440.0) Encodes mitochondrial gamma carbonic anhydrase. Component of the NADH dehydrogenase complex.; gamma carbonic anhydrase 2 (GAMMA CA2); FUNCTIONS IN: carbonate dehydratase activity; INVOLVED IN: response to salt stress, regulation of oxygen and reactive oxygen species metabolic process, anther dehiscence, photorespiration; L…
'10.2'	'cell wall.cellulose synthesis'	HORVU6Hr1G034630,8	12.2464	0	'(loc_os02g09930.1 : 548.0) no description available & (at5g22740 : 456.0) encodes a beta-mannan synthase based on in vitro enzyme assays from heterologously expressed protein; cellulose synthase-like A02 (CSLA02); CONTAINS InterPro DOMAIN/s: Glycosyl transferase, family 2 (InterPro:IPR001173); BEST Arabidopsis thaliana protein match is: Nucleotide-diphospho-sugar transferases superfamily protein…
'10.2.1'	'cell wall.cellulose synthesis.cellulose synthase'	HORVU5Hr1G052100,14	10.3376	4.4724e-89	'(loc_os05g08370.1 : 1656.0) no description available & (at4g32410 : 1483.0) Encodes a cellulose synthase isomer. CESA1 mutants have cellulose defect in the primary cell wall. Multiple lines of evidence suggest that CESA1, along with CESA3 and CESA6 are present in the same plasma membrane complex for cellulose biosynthesis. lasma membrane complex for cellulose biosynthesis. As inferred from the n…
'10.2.1'	'cell wall.cellulose synthesis.cellulose synthase'	HORVU5Hr1G069600,9	10.4051	0	'(loc_os05g08370.1 : 1995.0) no description available & (at4g32410 : 1705.0) Encodes a cellulose synthase isomer. CESA1 mutants have cellulose defect in the primary cell wall. Multiple lines of evidence suggest that CESA1, along with CESA3 and CESA6 are present in the same plasma membrane complex for cellulose biosynthesis. lasma membrane complex for cellulose biosynthesis. As inferred from the n…
'10.2.1'	'cell wall.cellulose synthesis.cellulose synthase'	HORVU5Hr1G073970,4	10.4263	7.64142e-298	'(loc_os05g08370.1 : 1995.0) no description available & (at4g32410 : 1705.0) Encodes a cellulose synthase isomer. CESA1 mutants have cellulose defect in the primary cell wall. Multiple lines of evidence suggest that CESA1, along with CESA3 and CESA6 are present in the same plasma membrane complex for cellulose biosynthesis. lasma membrane complex for cellulose biosynthesis. As inferred from the n…
'10.2.1'	'cell wall.cellulose synthesis.cellulose synthase'	HORVU5Hr1G077200,1	10.5925	1.15093e-199	'(loc_os05g08370.1 : 1856.0) no description available & (at4g32410 : 1604.0) Encodes a cellulose synthase isomer. CESA1 mutants have cellulose defect in the primary cell wall. Multiple lines of evidence suggest that CESA1, along with CESA3 and CESA6 are present in the same plasma membrane complex for cellulose biosynthesis. lasma membrane complex for cellulose biosynthesis. As inferred from the n…
'10.2.1'	'cell wall.cellulose synthesis.cellulose synthase'	HORVU5Hr1G098890,9	10.4409	4.7969e-50	'(loc_os05g08370.1 : 1947.0) no description available & (at4g32410 : 1683.0) Encodes a cellulose synthase isomer. CESA1 mutants have cellulose defect in the primary cell wall. Multiple lines of evidence suggest that CESA1, along with CESA3 and CESA6 are present in the same plasma membrane complex for cellulose biosynthesis. lasma membrane complex for cellulose biosynthesis. As inferred from the n…
'10.2.1'	'cell wall.cellulose synthesis.cellulose synthase'	HORVU6Hr1G044700,4	11.0519	1.88774e-62	'(loc_os05g08370.1 : 1995.0) no description available & (at4g32410 : 1705.0) Encodes a cellulose synthase isomer. CESA1 mutants have cellulose defect in the primary cell wall. Multiple lines of evidence suggest that CESA1, along with CESA3 and CESA6 are present in the same plasma membrane complex for cellulose biosynthesis. lasma membrane complex for cellulose biosynthesis. As inferred from the n…
'10.2.1'	'cell wall.cellulose synthesis.cellulose synthase'	HORVU6Hr1G052420,10	10.9144	0	'(loc_os05g08370.1 : 1948.0) no description available & (at4g32410 : 1683.0) Encodes a cellulose synthase isomer. CESA1 mutants have cellulose defect in the primary cell wall. Multiple lines of evidence suggest that CESA1, along with CESA3 and CESA6 are present in the same plasma membrane complex for cellulose biosynthesis. lasma membrane complex for cellulose biosynthesis. As inferred from the n…
'10.2.1'	'cell wall.cellulose synthesis.cellulose synthase'	HORVU6Hr1G055840,12	11	2.19706e-247	'(loc_os05g08370.1 : 681.0) no description available & (at4g32410 : 602.0) Encodes a cellulose synthase isomer. CESA1 mutants have cellulose defect in the primary cell wall. Multiple lines of evidence suggest that CESA1, along with CESA3 and CESA6 are present in the same plasma membrane complex for cellulose biosynthesis. lasma membrane complex for cellulose biosynthesis. As inferred from the nul…
'10.2.1'	'cell wall.cellulose synthesis.cellulose synthase'	HORVU7Hr1G008320,3	10.268	9.00216e-30	'(loc_os05g08370.1 : 1610.0) no description available & (at4g32410 : 1450.0) Encodes a cellulose synthase isomer. CESA1 mutants have cellulose defect in the primary cell wall. Multiple lines of evidence suggest that CESA1, along with CESA3 and CESA6 are present in the same plasma membrane complex for cellulose biosynthesis. lasma membrane complex for cellulose biosynthesis. As inferred from the n…
'10.2.1'	'cell wall.cellulose synthesis.cellulose synthase'	HORVU7Hr1G022550,4	10.6027	3.15654e-138	'(loc_os05g08370.1 : 1607.0) no description available & (at4g32410 : 1449.0) Encodes a cellulose synthase isomer. CESA1 mutants have cellulose defect in the primary cell wall. Multiple lines of evidence suggest that CESA1, along with CESA3 and CESA6 are present in the same plasma membrane complex for cellulose biosynthesis. lasma membrane complex for cellulose biosynthesis. As inferred from the n…
'10.2.1'	'cell wall.cellulose synthesis.cellulose synthase'	HORVU7Hr1G086690,16	10.2503	3.11246e-261	'(loc_os05g08370.1 : 491.0) no description available & (at4g32410 : 368.0) Encodes a cellulose synthase isomer. CESA1 mutants have cellulose defect in the primary cell wall. Multiple lines of evidence suggest that CESA1, along with CESA3 and CESA6 are present in the same plasma membrane complex for cellulose biosynthesis. lasma membrane complex for cellulose biosynthesis. As inferred from the nul…
'10.6.2'	'cell wall.degradation.mannan-xylose-arabinose-fucose'	HORVU5Hr1G045150,13	10.151	5.60002e-113	'(loc_os11g03730.3 : 533.0) no description available & (at3g10740 : 401.0) Encodes a bifunctional alpha-l-arabinofuranosidase/beta-d-xylosidase that belongs to family 51 of glycoside hydrolases. It may be involved in cell wall modification.; alpha-L-arabinofuranosidase 1 (ASD1); FUNCTIONS IN: hydrolase activity, acting on glycosyl bonds, xylan 1,4-beta-xylosidase activity, alpha-N-arabinofuranosi…
'10.7'	'cell wall.modification'	HORVU6Hr1G067470,4	9.8933	0	'(loc_os02g46910.1 : 244.0) no description available & (at2g01850 : 187.0) EXGT-A3 has homology to xyloglucan endotransglucosylases/hydrolases (XTHs). Mutants in this gene show a lesion mimic phenotype associated with leaf maturation and a reduction in the number of tertiary veins. Individual tracheary elements in the mutants are shorter, but phloem transport activity is not severely affected. EX…
'10.7'	'cell wall.modification'	HORVU6Hr1G075970,5	9.74147	1.2269e-84	'(q6zgu9|expa5_orysa : 393.0) Expansin-A5 precursor (OsEXPA5) (Alpha-expansin-5) (OsEXP5) (OsaEXPa1.20) - Oryza sativa (Rice) & (loc_os02g51040.1 : 393.0) no description available & (at1g69530 : 328.0) Member of Alpha-Expansin Gene Family. Naming convention from the Expansin Working Group (Kende et al, Plant Mol Bio). Involved in the formation of nematode-induced syncytia in roots of Arabidopsis …
'11.3.1'	'lipid metabolism.Phospholipid synthesis.1-acylglycerol-3-phosphate O-acyltransferase'	HORVU1Hr1G050900,10	9.71425	1.0583e-56	'(loc_os10g42720.1 : 650.0) no description available & (q39639|plsb_cucsa : 521.0) Glycerol-3-phosphate acyltransferase, chloroplast precursor (EC 2.3.1.15) (GPAT) - Cucumis sativus (Cucumber) & (at1g32200 : 509.0) Encodes a chloroplast glycerol-3-phosphate acyltransferase.Involved in the biosynthesis of chloroplast phosphatidylglycerol.; ATS1; FUNCTIONS IN: glycerol-3-phosphate O-acyltransferase…
'11.3.3'	'lipid metabolism.Phospholipid synthesis.phosphatidate cytidylyltransferase'	HORVU3Hr1G073040,12	9.99435	3.9816e-60	'(loc_os01g55360.3 : 798.0) no description available & (o04940|cds1_soltu : 670.0) Phosphatidate cytidylyltransferase (EC 2.7.7.41) (CDP-diglyceride synthetase) (CDP-diglyceride pyrophosphorylase) (CDP-diacylglycerol synthase) (CDS) (CTP:phosphatidate cytidylyltransferase) (CDP-DAG synthase) (CDP-DG synthetase) - Sola & (at1g62430 : 655.0) Encodes a CDP-diacylglycerol synthase, involved in phosph…
'11.6'	'lipid metabolism.lipid transfer proteins etc'	HORVU3Hr1G081170,5	9.77149	2.67804e-40	'(loc_os01g60740.1 : 156.0) no description available & (q42978|nltp2_orysa : 98.2) Nonspecific lipid-transfer protein 2 precursor (LTP 2) - Oryza sativa (Rice) & (at5g01870 : 90.1) Predicted to encode a PR (pathogenesis-related) protein. Belongs to the lipid transfer protein (PR-14) family with the following members: At2g38540/LTP1, At2g38530/LTP2, At5g59320/LTP3, At5g59310/LTP4, At3g51600/LTP5, …
'11.8'	'lipid metabolism.'exotics'(steroids, squalene etc)'	HORVU5Hr1G113310,12	10.8439	6.63248e-72	'(loc_os12g43670.1 : 171.0) no description available & (at1g10030 : 167.0) homolog of yeast ergosterol28 (ERG28); INVOLVED IN: biological_process unknown; LOCATED IN: endomembrane system, integral to membrane; EXPRESSED IN: 22 plant structures; EXPRESSED DURING: 13 growth stages; CONTAINS InterPro DOMAIN/s: Erg28-like (InterPro:IPR005352); Has 223 Blast hits to 223 proteins in 105 species: Archae…
'11.8'	'lipid metabolism.'exotics'(steroids, squalene etc)'	HORVU6Hr1G035190,2	10.4115	1.55044e-135	'(at1g10030 : 114.0) homolog of yeast ergosterol28 (ERG28); INVOLVED IN: biological_process unknown; LOCATED IN: endomembrane system, integral to membrane; EXPRESSED IN: 22 plant structures; EXPRESSED DURING: 13 growth stages; CONTAINS InterPro DOMAIN/s: Erg28-like (InterPro:IPR005352); Has 223 Blast hits to 223 proteins in 105 species: Archae - 0; Bacteria - 0; Metazoa - 67; Fungi - 94; Plants -…
'11.8'	'lipid metabolism.'exotics'(steroids, squalene etc)'	HORVU7Hr1G102480,7	10.3197	5.53838e-149	'(loc_os12g43670.1 : 160.0) no description available & (at1g10030 : 157.0) homolog of yeast ergosterol28 (ERG28); INVOLVED IN: biological_process unknown; LOCATED IN: endomembrane system, integral to membrane; EXPRESSED IN: 22 plant structures; EXPRESSED DURING: 13 growth stages; CONTAINS InterPro DOMAIN/s: Erg28-like (InterPro:IPR005352); Has 223 Blast hits to 223 proteins in 105 species: Archae…
'13.1.1.3.1'	'amino acid metabolism.synthesis.central amino acid metabolism.alanine.alanine aminotransferase'	HORVU5Hr1G070740,1	10.5372	0	'(p52894|ala2_horvu : 412.0) Alanine aminotransferase 2 (EC 2.6.1.2) (GPT) (Glutamic--pyruvic transaminase 2) (Glutamic--alanine transaminase 2) (ALAAT-2) - Hordeum vulgare (Barley) & (loc_os10g25130.1 : 377.0) no description available & (at1g17290 : 346.0) Encodes for alanine aminotransferase (ALAAT1), involved in alanine catabolism during plants recovery from hypoxia; alanine aminotransferas (A…
'13.1.1.3.1'	'amino acid metabolism.synthesis.central amino acid metabolism.alanine.alanine aminotransferase'	HORVU5Hr1G092840,35	10.9233	1.36138e-244	'(p52894|ala2_horvu : 922.0) Alanine aminotransferase 2 (EC 2.6.1.2) (GPT) (Glutamic--pyruvic transaminase 2) (Glutamic--alanine transaminase 2) (ALAAT-2) - Hordeum vulgare (Barley) & (loc_os10g25130.1 : 827.0) no description available & (at1g17290 : 732.0) Encodes for alanine aminotransferase (ALAAT1), involved in alanine catabolism during plants recovery from hypoxia; alanine aminotransferas (A…
'13.1.1.3.1'	'amino acid metabolism.synthesis.central amino acid metabolism.alanine.alanine aminotransferase'	HORVU5Hr1G098960,9	11.4924	0	'(p52894|ala2_horvu : 721.0) Alanine aminotransferase 2 (EC 2.6.1.2) (GPT) (Glutamic--pyruvic transaminase 2) (Glutamic--alanine transaminase 2) (ALAAT-2) - Hordeum vulgare (Barley) & (loc_os10g25130.1 : 655.0) no description available & (at1g17290 : 602.0) Encodes for alanine aminotransferase (ALAAT1), involved in alanine catabolism during plants recovery from hypoxia; alanine aminotransferas (A…
'13.1.1.3.1'	'amino acid metabolism.synthesis.central amino acid metabolism.alanine.alanine aminotransferase'	HORVU5Hr1G106310,8	10.7657	0	'(p52894|ala2_horvu : 597.0) Alanine aminotransferase 2 (EC 2.6.1.2) (GPT) (Glutamic--pyruvic transaminase 2) (Glutamic--alanine transaminase 2) (ALAAT-2) - Hordeum vulgare (Barley) & (loc_os10g25130.1 : 539.0) no description available & (at1g72330 : 471.0) Encodes for alanine aminotransferase ALAAT2.; alanine aminotransferase 2 (ALAAT2); FUNCTIONS IN: copper ion binding, L-alanine:2-oxoglutarate…
'13.1.1.3.1'	'amino acid metabolism.synthesis.central amino acid metabolism.alanine.alanine aminotransferase'	HORVU5Hr1G114780,1	10.5925	4.06866e-82	'(p52894|ala2_horvu : 721.0) Alanine aminotransferase 2 (EC 2.6.1.2) (GPT) (Glutamic--pyruvic transaminase 2) (Glutamic--alanine transaminase 2) (ALAAT-2) - Hordeum vulgare (Barley) & (loc_os10g25130.1 : 655.0) no description available & (at1g17290 : 602.0) Encodes for alanine aminotransferase (ALAAT1), involved in alanine catabolism during plants recovery from hypoxia; alanine aminotransferas (A…
'13.1.1.3.1'	'amino acid metabolism.synthesis.central amino acid metabolism.alanine.alanine aminotransferase'	HORVU6Hr1G016120,4	10.8265	3.45938e-232	'(p52894|ala2_horvu : 721.0) Alanine aminotransferase 2 (EC 2.6.1.2) (GPT) (Glutamic--pyruvic transaminase 2) (Glutamic--alanine transaminase 2) (ALAAT-2) - Hordeum vulgare (Barley) & (loc_os10g25130.1 : 655.0) no description available & (at1g17290 : 602.0) Encodes for alanine aminotransferase (ALAAT1), involved in alanine catabolism during plants recovery from hypoxia; alanine aminotransferas (A…
'13.1.1.3.1'	'amino acid metabolism.synthesis.central amino acid metabolism.alanine.alanine aminotransferase'	HORVU6Hr1G037500,33	10.374	6.13992e-192	'(p52894|ala2_horvu : 886.0) Alanine aminotransferase 2 (EC 2.6.1.2) (GPT) (Glutamic--pyruvic transaminase 2) (Glutamic--alanine transaminase 2) (ALAAT-2) - Hordeum vulgare (Barley) & (loc_os10g25130.1 : 800.0) no description available & (at1g72330 : 708.0) Encodes for alanine aminotransferase ALAAT2.; alanine aminotransferase 2 (ALAAT2); FUNCTIONS IN: copper ion binding, L-alanine:2-oxoglutarate…
'13.1.1.3.1'	'amino acid metabolism.synthesis.central amino acid metabolism.alanine.alanine aminotransferase'	HORVU6Hr1G046540,14	10.3934	1.09008e-146	'(p52894|ala2_horvu : 863.0) Alanine aminotransferase 2 (EC 2.6.1.2) (GPT) (Glutamic--pyruvic transaminase 2) (Glutamic--alanine transaminase 2) (ALAAT-2) - Hordeum vulgare (Barley) & (loc_os10g25130.1 : 776.0) no description available & (at1g17290 : 694.0) Encodes for alanine aminotransferase (ALAAT1), involved in alanine catabolism during plants recovery from hypoxia; alanine aminotransferas (A…
'13.1.1.3.1'	'amino acid metabolism.synthesis.central amino acid metabolism.alanine.alanine aminotransferase'	HORVU6Hr1G058100,7	10.5507	5.0283e-76	'(p52894|ala2_horvu : 783.0) Alanine aminotransferase 2 (EC 2.6.1.2) (GPT) (Glutamic--pyruvic transaminase 2) (Glutamic--alanine transaminase 2) (ALAAT-2) - Hordeum vulgare (Barley) & (loc_os10g25130.1 : 701.0) no description available & (at1g72330 : 632.0) Encodes for alanine aminotransferase ALAAT2.; alanine aminotransferase 2 (ALAAT2); FUNCTIONS IN: copper ion binding, L-alanine:2-oxoglutarate…
'13.1.1.3.1'	'amino acid metabolism.synthesis.central amino acid metabolism.alanine.alanine aminotransferase'	HORVU6Hr1G084080,7	10.2264	1.88774e-62	'(p52894|ala2_horvu : 721.0) Alanine aminotransferase 2 (EC 2.6.1.2) (GPT) (Glutamic--pyruvic transaminase 2) (Glutamic--alanine transaminase 2) (ALAAT-2) - Hordeum vulgare (Barley) & (loc_os10g25130.1 : 655.0) no description available & (at1g17290 : 602.0) Encodes for alanine aminotransferase (ALAAT1), involved in alanine catabolism during plants recovery from hypoxia; alanine aminotransferas (A…
'13.1.1.3.1'	'amino acid metabolism.synthesis.central amino acid metabolism.alanine.alanine aminotransferase'	HORVU7Hr1G000480,4	10.8719	0	'(p52894|ala2_horvu : 736.0) Alanine aminotransferase 2 (EC 2.6.1.2) (GPT) (Glutamic--pyruvic transaminase 2) (Glutamic--alanine transaminase 2) (ALAAT-2) - Hordeum vulgare (Barley) & (loc_os10g25130.1 : 665.0) no description available & (at1g17290 : 608.0) Encodes for alanine aminotransferase (ALAAT1), involved in alanine catabolism during plants recovery from hypoxia; alanine aminotransferas (A…
'13.1.1.3.1'	'amino acid metabolism.synthesis.central amino acid metabolism.alanine.alanine aminotransferase'	HORVU7Hr1G002220,4	10.5304	8.56684e-115	'(p52894|ala2_horvu : 524.0) Alanine aminotransferase 2 (EC 2.6.1.2) (GPT) (Glutamic--pyruvic transaminase 2) (Glutamic--alanine transaminase 2) (ALAAT-2) - Hordeum vulgare (Barley) & (loc_os10g25130.1 : 464.0) no description available & (at1g17290 : 431.0) Encodes for alanine aminotransferase (ALAAT1), involved in alanine catabolism during plants recovery from hypoxia; alanine aminotransferas (A…
'13.1.1.3.1'	'amino acid metabolism.synthesis.central amino acid metabolism.alanine.alanine aminotransferase'	HORVU7Hr1G032310,5	10.568	4.16984e-128	'(p52894|ala2_horvu : 236.0) Alanine aminotransferase 2 (EC 2.6.1.2) (GPT) (Glutamic--pyruvic transaminase 2) (Glutamic--alanine transaminase 2) (ALAAT-2) - Hordeum vulgare (Barley) & (loc_os10g25130.1 : 202.0) no description available & (at1g17290 : 185.0) Encodes for alanine aminotransferase (ALAAT1), involved in alanine catabolism during plants recovery from hypoxia; alanine aminotransferas (A…
'13.1.1.3.1'	'amino acid metabolism.synthesis.central amino acid metabolism.alanine.alanine aminotransferase'	HORVU7Hr1G045240,8	10.5718	2.01764e-179	'(p52894|ala2_horvu : 520.0) Alanine aminotransferase 2 (EC 2.6.1.2) (GPT) (Glutamic--pyruvic transaminase 2) (Glutamic--alanine transaminase 2) (ALAAT-2) - Hordeum vulgare (Barley) & (loc_os10g25130.1 : 472.0) no description available & (at1g72330 : 408.0) Encodes for alanine aminotransferase ALAAT2.; alanine aminotransferase 2 (ALAAT2); FUNCTIONS IN: copper ion binding, L-alanine:2-oxoglutarate…
'13.1.1.3.1'	'amino acid metabolism.synthesis.central amino acid metabolism.alanine.alanine aminotransferase'	HORVU7Hr1G059090,4	11.0063	2.3462e-299	'(p52894|ala2_horvu : 922.0) Alanine aminotransferase 2 (EC 2.6.1.2) (GPT) (Glutamic--pyruvic transaminase 2) (Glutamic--alanine transaminase 2) (ALAAT-2) - Hordeum vulgare (Barley) & (loc_os10g25130.1 : 827.0) no description available & (at1g17290 : 731.0) Encodes for alanine aminotransferase (ALAAT1), involved in alanine catabolism during plants recovery from hypoxia; alanine aminotransferas (A…
'13.1.1.3.1'	'amino acid metabolism.synthesis.central amino acid metabolism.alanine.alanine aminotransferase'	HORVU7Hr1G071710,2	11.1699	6.50872e-236	'(p52894|ala2_horvu : 402.0) Alanine aminotransferase 2 (EC 2.6.1.2) (GPT) (Glutamic--pyruvic transaminase 2) (Glutamic--alanine transaminase 2) (ALAAT-2) - Hordeum vulgare (Barley) & (loc_os10g25130.1 : 356.0) no description available & (at1g17290 : 326.0) Encodes for alanine aminotransferase (ALAAT1), involved in alanine catabolism during plants recovery from hypoxia; alanine aminotransferas (A…
'13.1.1.3.1'	'amino acid metabolism.synthesis.central amino acid metabolism.alanine.alanine aminotransferase'	HORVU7Hr1G074850,2	10.4898	3.41064e-302	'(p52894|ala2_horvu : 696.0) Alanine aminotransferase 2 (EC 2.6.1.2) (GPT) (Glutamic--pyruvic transaminase 2) (Glutamic--alanine transaminase 2) (ALAAT-2) - Hordeum vulgare (Barley) & (loc_os10g25130.1 : 634.0) no description available & (at1g17290 : 578.0) Encodes for alanine aminotransferase (ALAAT1), involved in alanine catabolism during plants recovery from hypoxia; alanine aminotransferas (A…
'13.1.1.3.1'	'amino acid metabolism.synthesis.central amino acid metabolism.alanine.alanine aminotransferase'	HORVU7Hr1G100120,13	10.7074	6.37898e-130	'(p52894|ala2_horvu : 922.0) Alanine aminotransferase 2 (EC 2.6.1.2) (GPT) (Glutamic--pyruvic transaminase 2) (Glutamic--alanine transaminase 2) (ALAAT-2) - Hordeum vulgare (Barley) & (loc_os10g25130.1 : 827.0) no description available & (at1g17290 : 731.0) Encodes for alanine aminotransferase (ALAAT1), involved in alanine catabolism during plants recovery from hypoxia; alanine aminotransferas (A…
'13.1.2.2.1'	'amino acid metabolism.synthesis.glutamate family.proline.delta 1-pyrroline-5-carboxylate synthetase'	HORVU5Hr1G085560,4	10.8619	0	'(o04226|p5cs_orysa : 1002.0) Delta 1-pyrroline-5-carboxylate synthetase (P5CS) [Includes: Glutamate 5-kinase (EC 2.7.2.11) (Gamma-glutamyl kinase) (GK); Gamma-glutamyl phosphate reductase (GPR) (EC 1.2.1.41) (Glutamate-5-semialdehyde dehydrogenase) (Glutamyl-gamma- & (loc_os05g38150.2 : 1002.0) no description available & (at2g39800 : 846.0) delta1-pyrroline-5-carboxylate synthase 1 (P5CS1); CONT…
'13.1.2.2.1'	'amino acid metabolism.synthesis.glutamate family.proline.delta 1-pyrroline-5-carboxylate synthetase'	HORVU5Hr1G098040,3	10.29	1.4e-307	'(o04226|p5cs_orysa : 1054.0) Delta 1-pyrroline-5-carboxylate synthetase (P5CS) [Includes: Glutamate 5-kinase (EC 2.7.2.11) (Gamma-glutamyl kinase) (GK); Gamma-glutamyl phosphate reductase (GPR) (EC 1.2.1.41) (Glutamate-5-semialdehyde dehydrogenase) (Glutamyl-gamma- & (loc_os05g38150.2 : 1054.0) no description available & (at2g39800 : 886.0) delta1-pyrroline-5-carboxylate synthase 1 (P5CS1); CONT…
'13.1.2.2.1'	'amino acid metabolism.synthesis.glutamate family.proline.delta 1-pyrroline-5-carboxylate synthetase'	HORVU6Hr1G070560,12	10.9858	3.674e-288	'(o04226|p5cs_orysa : 1006.0) Delta 1-pyrroline-5-carboxylate synthetase (P5CS) [Includes: Glutamate 5-kinase (EC 2.7.2.11) (Gamma-glutamyl kinase) (GK); Gamma-glutamyl phosphate reductase (GPR) (EC 1.2.1.41) (Glutamate-5-semialdehyde dehydrogenase) (Glutamyl-gamma- & (loc_os05g38150.2 : 1006.0) no description available & (at2g39800 : 850.0) delta1-pyrroline-5-carboxylate synthase 1 (P5CS1); CONT…
'13.1.2.2.1'	'amino acid metabolism.synthesis.glutamate family.proline.delta 1-pyrroline-5-carboxylate synthetase'	HORVU7Hr1G022270,13	10.7499	1.3732e-90	'(o04226|p5cs_orysa : 1073.0) Delta 1-pyrroline-5-carboxylate synthetase (P5CS) [Includes: Glutamate 5-kinase (EC 2.7.2.11) (Gamma-glutamyl kinase) (GK); Gamma-glutamyl phosphate reductase (GPR) (EC 1.2.1.41) (Glutamate-5-semialdehyde dehydrogenase) (Glutamyl-gamma- & (loc_os05g38150.2 : 1073.0) no description available & (at2g39800 : 902.0) delta1-pyrroline-5-carboxylate synthase 1 (P5CS1); CONT…
'13.1.2.2.1'	'amino acid metabolism.synthesis.glutamate family.proline.delta 1-pyrroline-5-carboxylate synthetase'	HORVU7Hr1G039780,5	10.8305	4.42316e-125	'(o04226|p5cs_orysa : 277.0) Delta 1-pyrroline-5-carboxylate synthetase (P5CS) [Includes: Glutamate 5-kinase (EC 2.7.2.11) (Gamma-glutamyl kinase) (GK); Gamma-glutamyl phosphate reductase (GPR) (EC 1.2.1.41) (Glutamate-5-semialdehyde dehydrogenase) (Glutamyl-gamma- & (loc_os05g38150.2 : 277.0) no description available & (at3g55610 : 222.0) encodes delta 1-pyrroline-5-carboxylate synthetase B. Gen…
'13.1.2.2.1'	'amino acid metabolism.synthesis.glutamate family.proline.delta 1-pyrroline-5-carboxylate synthetase'	HORVU7Hr1G041850,11	10.4419	1.23715e-138	'(o04226|p5cs_orysa : 1004.0) Delta 1-pyrroline-5-carboxylate synthetase (P5CS) [Includes: Glutamate 5-kinase (EC 2.7.2.11) (Gamma-glutamyl kinase) (GK); Gamma-glutamyl phosphate reductase (GPR) (EC 1.2.1.41) (Glutamate-5-semialdehyde dehydrogenase) (Glutamyl-gamma- & (loc_os05g38150.2 : 1004.0) no description available & (at2g39800 : 847.0) delta1-pyrroline-5-carboxylate synthase 1 (P5CS1); CONT…
'13.1.2.2.1'	'amino acid metabolism.synthesis.glutamate family.proline.delta 1-pyrroline-5-carboxylate synthetase'	HORVU7Hr1G046980,2	10.3197	2.29054e-52	'(o04226|p5cs_orysa : 1144.0) Delta 1-pyrroline-5-carboxylate synthetase (P5CS) [Includes: Glutamate 5-kinase (EC 2.7.2.11) (Gamma-glutamyl kinase) (GK); Gamma-glutamyl phosphate reductase (GPR) (EC 1.2.1.41) (Glutamate-5-semialdehyde dehydrogenase) (Glutamyl-gamma- & (loc_os05g38150.2 : 1144.0) no description available & (at2g39800 : 957.0) delta1-pyrroline-5-carboxylate synthase 1 (P5CS1); CONT…
'13.1.3.4'	'amino acid metabolism.synthesis.aspartate family.methionine'	HORVU6Hr1G063560,7	10.0835	9.0247e-80	'(p50299|metk_horvu : 763.0) S-adenosylmethionine synthetase 1 (EC 2.5.1.6) (Methionine adenosyltransferase 1) (AdoMet synthetase 1) - Hordeum vulgare (Barley) & (loc_os01g22010.3 : 731.0) no description available & (at3g17390 : 696.0) S-adenosylmethionine synthetase; METHIONINE OVER-ACCUMULATOR 3 (MTO3); FUNCTIONS IN: methionine adenosyltransferase activity; INVOLVED IN: lignin biosynthetic proc…
'13.1.3.4.13'	'amino acid metabolism.synthesis.aspartate family.methionine.methionine S-methyltransferase'	HORVU1Hr1G002150,8	10.1189	1.50946e-97	'(q9mbc2|mmt1_horvu : 1989.0) Methionine S-methyltransferase (EC 2.1.1.12) (AdoMet:Met S-methyltransferase) (Hv-MMT1) - Hordeum vulgare (Barley) & (loc_os05g01470.2 : 1786.0) no description available & (at5g49810 : 1296.0) Arabidopsis thaliana methionine S-methyltransferase, an enzyme that catalyzes S -methylmethionine formation.; methionine S-methyltransferase (MMT); CONTAINS InterPro DOMAIN/s: …
'13.1.6.1.5'	'amino acid metabolism.synthesis.aromatic aa.chorismate.shikimate kinase'	HORVU5Hr1G054690,1	10.3509	5.91782e-48	'(loc_os04g54800.2 : 322.0) no description available & (at2g21940 : 229.0) shikimate kinase 1 (SK1); FUNCTIONS IN: shikimate kinase activity, ATP binding; EXPRESSED IN: 19 plant structures; EXPRESSED DURING: 10 growth stages; CONTAINS InterPro DOMAIN/s: Shikimate kinase (InterPro:IPR000623); BEST Arabidopsis thaliana protein match is: shikimate kinase 2 (TAIR:AT4G39540.2); Has 7831 Blast hits to …
'13.1.6.1.5'	'amino acid metabolism.synthesis.aromatic aa.chorismate.shikimate kinase'	HORVU5Hr1G057600,1	11.4057	2.9019e-300	'(loc_os04g54800.2 : 310.0) no description available & (at2g21940 : 226.0) shikimate kinase 1 (SK1); FUNCTIONS IN: shikimate kinase activity, ATP binding; EXPRESSED IN: 19 plant structures; EXPRESSED DURING: 10 growth stages; CONTAINS InterPro DOMAIN/s: Shikimate kinase (InterPro:IPR000623); BEST Arabidopsis thaliana protein match is: shikimate kinase 2 (TAIR:AT4G39540.2); Has 7831 Blast hits to …
'13.1.6.1.5'	'amino acid metabolism.synthesis.aromatic aa.chorismate.shikimate kinase'	HORVU5Hr1G086500,3	10.6653	5.81018e-182	'(loc_os04g54800.1 : 418.0) no description available & (at2g21940 : 258.0) shikimate kinase 1 (SK1); FUNCTIONS IN: shikimate kinase activity, ATP binding; EXPRESSED IN: 19 plant structures; EXPRESSED DURING: 10 growth stages; CONTAINS InterPro DOMAIN/s: Shikimate kinase (InterPro:IPR000623); BEST Arabidopsis thaliana protein match is: shikimate kinase 2 (TAIR:AT4G39540.2); Has 7831 Blast hits to …
'13.1.6.1.5'	'amino acid metabolism.synthesis.aromatic aa.chorismate.shikimate kinase'	HORVU6Hr1G021170,3	10.3365	1.26621e-165	'(loc_os04g54800.1 : 206.0) no description available & (at2g21940 : 149.0) shikimate kinase 1 (SK1); FUNCTIONS IN: shikimate kinase activity, ATP binding; EXPRESSED IN: 19 plant structures; EXPRESSED DURING: 10 growth stages; CONTAINS InterPro DOMAIN/s: Shikimate kinase (InterPro:IPR000623); BEST Arabidopsis thaliana protein match is: shikimate kinase 2 (TAIR:AT4G39540.2); Has 7831 Blast hits to …
'13.1.6.1.5'	'amino acid metabolism.synthesis.aromatic aa.chorismate.shikimate kinase'	HORVU6Hr1G041010,1	11.0775	4.3204e-162	'(loc_os04g54800.2 : 370.0) no description available & (at2g21940 : 253.0) shikimate kinase 1 (SK1); FUNCTIONS IN: shikimate kinase activity, ATP binding; EXPRESSED IN: 19 plant structures; EXPRESSED DURING: 10 growth stages; CONTAINS InterPro DOMAIN/s: Shikimate kinase (InterPro:IPR000623); BEST Arabidopsis thaliana protein match is: shikimate kinase 2 (TAIR:AT4G39540.2); Has 7831 Blast hits to …
'13.1.6.1.5'	'amino acid metabolism.synthesis.aromatic aa.chorismate.shikimate kinase'	HORVU6Hr1G048570,1	10.4533	2.28096e-76	'(loc_os04g54800.1 : 226.0) no description available & (at2g21940 : 153.0) shikimate kinase 1 (SK1); FUNCTIONS IN: shikimate kinase activity, ATP binding; EXPRESSED IN: 19 plant structures; EXPRESSED DURING: 10 growth stages; CONTAINS InterPro DOMAIN/s: Shikimate kinase (InterPro:IPR000623); BEST Arabidopsis thaliana protein match is: shikimate kinase 2 (TAIR:AT4G39540.2); Has 7831 Blast hits to …
'13.1.6.1.5'	'amino acid metabolism.synthesis.aromatic aa.chorismate.shikimate kinase'	HORVU6Hr1G052620,9	10.8281	4.0366e-253	'(loc_os04g54800.1 : 336.0) no description available & (at2g21940 : 227.0) shikimate kinase 1 (SK1); FUNCTIONS IN: shikimate kinase activity, ATP binding; EXPRESSED IN: 19 plant structures; EXPRESSED DURING: 10 growth stages; CONTAINS InterPro DOMAIN/s: Shikimate kinase (InterPro:IPR000623); BEST Arabidopsis thaliana protein match is: shikimate kinase 2 (TAIR:AT4G39540.2); Has 7831 Blast hits to …
'13.1.6.1.5'	'amino acid metabolism.synthesis.aromatic aa.chorismate.shikimate kinase'	HORVU6Hr1G066960,16	10.9366	2.10826e-66	'(loc_os04g54800.1 : 336.0) no description available & (at2g21940 : 227.0) shikimate kinase 1 (SK1); FUNCTIONS IN: shikimate kinase activity, ATP binding; EXPRESSED IN: 19 plant structures; EXPRESSED DURING: 10 growth stages; CONTAINS InterPro DOMAIN/s: Shikimate kinase (InterPro:IPR000623); BEST Arabidopsis thaliana protein match is: shikimate kinase 2 (TAIR:AT4G39540.2); Has 7831 Blast hits to …
'13.1.6.1.5'	'amino acid metabolism.synthesis.aromatic aa.chorismate.shikimate kinase'	HORVU7Hr1G032880,13	10.952	4.27872e-233	'(loc_os04g54800.2 : 335.0) no description available & (at2g21940 : 236.0) shikimate kinase 1 (SK1); FUNCTIONS IN: shikimate kinase activity, ATP binding; EXPRESSED IN: 19 plant structures; EXPRESSED DURING: 10 growth stages; CONTAINS InterPro DOMAIN/s: Shikimate kinase (InterPro:IPR000623); BEST Arabidopsis thaliana protein match is: shikimate kinase 2 (TAIR:AT4G39540.2); Has 7831 Blast hits to …
'13.1.6.1.5'	'amino acid metabolism.synthesis.aromatic aa.chorismate.shikimate kinase'	HORVU7Hr1G083180,2	10.4221	8.42958e-113	'(loc_os04g54800.1 : 395.0) no description available & (at2g21940 : 251.0) shikimate kinase 1 (SK1); FUNCTIONS IN: shikimate kinase activity, ATP binding; EXPRESSED IN: 19 plant structures; EXPRESSED DURING: 10 growth stages; CONTAINS InterPro DOMAIN/s: Shikimate kinase (InterPro:IPR000623); BEST Arabidopsis thaliana protein match is: shikimate kinase 2 (TAIR:AT4G39540.2); Has 7831 Blast hits to …
'13.1.6.1.5'	'amino acid metabolism.synthesis.aromatic aa.chorismate.shikimate kinase'	HORVU7Hr1G095370,11	10.2192	2.51272e-147	'(loc_os04g54800.2 : 303.0) no description available & (at2g21940 : 217.0) shikimate kinase 1 (SK1); FUNCTIONS IN: shikimate kinase activity, ATP binding; EXPRESSED IN: 19 plant structures; EXPRESSED DURING: 10 growth stages; CONTAINS InterPro DOMAIN/s: Shikimate kinase (InterPro:IPR000623); BEST Arabidopsis thaliana protein match is: shikimate kinase 2 (TAIR:AT4G39540.2); Has 7831 Blast hits to …
'13.1.6.5'	'amino acid metabolism.synthesis.aromatic aa.tryptophan'	HORVU7Hr1G033450,10	11.3815	0	'(loc_os04g59520.1 : 924.0) no description available & (at1g22610 : 743.0) C2 calcium/lipid-binding plant phosphoribosyltransferase family protein; FUNCTIONS IN: molecular_function unknown; INVOLVED IN: biological_process unknown; LOCATED IN: chloroplast; EXPRESSED IN: 22 plant structures; EXPRESSED DURING: 13 growth stages; CONTAINS InterPro DOMAIN/s: C2 membrane targeting protein (InterPro:IPR0…
'13.1.6.5'	'amino acid metabolism.synthesis.aromatic aa.tryptophan'	HORVU7Hr1G116640,2	10.623	1.43618e-93	'(loc_os04g59520.1 : 650.0) no description available & (at1g22610 : 570.0) C2 calcium/lipid-binding plant phosphoribosyltransferase family protein; FUNCTIONS IN: molecular_function unknown; INVOLVED IN: biological_process unknown; LOCATED IN: chloroplast; EXPRESSED IN: 22 plant structures; EXPRESSED DURING: 13 growth stages; CONTAINS InterPro DOMAIN/s: C2 membrane targeting protein (InterPro:IPR0…
'13.1.6.5.2'	'amino acid metabolism.synthesis.aromatic aa.tryptophan.anthranilate phosphoribosyltransferase'	HORVU4Hr1G083210,9	11.6294	2.65962e-80	'(loc_os03g03450.1 : 525.0) no description available & (at5g17990 : 419.0) Encodes the tryptophan biosynthetic enzyme phosphoribosylanthranilate transferase (PAT1, called trpD in bacteria). Converts anthranilate and phosphoribosylpyrophosphate into phosphoribosylanthranilate and inorganic pyrophosphate.; tryptophan biosynthesis 1 (TRP1); FUNCTIONS IN: anthranilate phosphoribosyltransferase activi…
'13.1.6.5.5'	'amino acid metabolism.synthesis.aromatic aa.tryptophan.tryptophan synthase'	HORVU3Hr1G003410,3	9.71768	1.45839e-146	'(loc_os03g58320.1 : 326.0) no description available & (p42390|trpa_maize : 282.0) Indole-3-glycerol phosphate lyase, chloroplast precursor (EC 4.1.2.8) (Indole synthase) (Tryptophan synthase alpha chain) (EC 4.2.1.20) (Benzoxazineless 1) - Zea mays (Maize) & (at3g54640 : 255.0) Catalyzes the conversion of indole-3-glycerolphosphate to indole, the penultimate reaction in the biosynthesis of trypt…
'13.1.6.5.5'	'amino acid metabolism.synthesis.aromatic aa.tryptophan.tryptophan synthase'	HORVU7Hr1G092800,9	9.71596	1.71734e-55	'(loc_os06g42560.3 : 278.0) no description available & (at5g38530 : 225.0) tryptophan synthase beta type 2 (TSBtype2); FUNCTIONS IN: pyridoxal phosphate binding, tryptophan synthase activity, catalytic activity; INVOLVED IN: tryptophan biosynthetic process, metabolic process; EXPRESSED IN: 21 plant structures; EXPRESSED DURING: 13 growth stages; CONTAINS InterPro DOMAIN/s: Pyridoxal phosphate-dep…
'13.2.2.2'	'amino acid metabolism.degradation.glutamate family.proline'	HORVU4Hr1G069230,1	10.2621	3.32836e-183	'(at5g62530 : 514.0) Encodes mitochondrial Delta-pyrroline-5- carboxylate dehydrogenase. Involved in the catabolism of proline to glutamate. Involved in protection from proline toxicity. Induced at pathogen infection sites. P5CDH and SRO5 (an overlapping gene in the sense orientation) generate 24-nt and 21-nt siRNAs, which together are components of a regulatory loop controlling reactive oxygen s…
'13.2.2.2'	'amino acid metabolism.degradation.glutamate family.proline'	HORVU5Hr1G002180,5	10.9629	6.55348e-294	'(at5g62530 : 865.0) Encodes mitochondrial Delta-pyrroline-5- carboxylate dehydrogenase. Involved in the catabolism of proline to glutamate. Involved in protection from proline toxicity. Induced at pathogen infection sites. P5CDH and SRO5 (an overlapping gene in the sense orientation) generate 24-nt and 21-nt siRNAs, which together are components of a regulatory loop controlling reactive oxygen s…
'13.2.2.2'	'amino acid metabolism.degradation.glutamate family.proline'	HORVU5Hr1G008980,5	10.5746	5.82862e-111	'(at5g62530 : 868.0) Encodes mitochondrial Delta-pyrroline-5- carboxylate dehydrogenase. Involved in the catabolism of proline to glutamate. Involved in protection from proline toxicity. Induced at pathogen infection sites. P5CDH and SRO5 (an overlapping gene in the sense orientation) generate 24-nt and 21-nt siRNAs, which together are components of a regulatory loop controlling reactive oxygen s…
'13.2.2.2'	'amino acid metabolism.degradation.glutamate family.proline'	HORVU4Hr1G015260,4	10.2216	0	'(at5g62530 : 798.0) Encodes mitochondrial Delta-pyrroline-5- carboxylate dehydrogenase. Involved in the catabolism of proline to glutamate. Involved in protection from proline toxicity. Induced at pathogen infection sites. P5CDH and SRO5 (an overlapping gene in the sense orientation) generate 24-nt and 21-nt siRNAs, which together are components of a regulatory loop controlling reactive oxygen s…
'13.2.2.2'	'amino acid metabolism.degradation.glutamate family.proline'	HORVU4Hr1G016810,11	10.403	4.62726e-146	'(at5g62530 : 865.0) Encodes mitochondrial Delta-pyrroline-5- carboxylate dehydrogenase. Involved in the catabolism of proline to glutamate. Involved in protection from proline toxicity. Induced at pathogen infection sites. P5CDH and SRO5 (an overlapping gene in the sense orientation) generate 24-nt and 21-nt siRNAs, which together are components of a regulatory loop controlling reactive oxygen s…
'13.2.2.2'	'amino acid metabolism.degradation.glutamate family.proline'	HORVU4Hr1G024950,8	10.7985	4.09148e-94	'(at5g62530 : 868.0) Encodes mitochondrial Delta-pyrroline-5- carboxylate dehydrogenase. Involved in the catabolism of proline to glutamate. Involved in protection from proline toxicity. Induced at pathogen infection sites. P5CDH and SRO5 (an overlapping gene in the sense orientation) generate 24-nt and 21-nt siRNAs, which together are components of a regulatory loop controlling reactive oxygen s…
'15.3'	'metal handling.regulation'	HORVU4Hr1G073630,3	11.8045	0	'(q58fk4|ard2_orysa : 401.0) 1,2-dihydroxy-3-keto-5-methylthiopentene dioxygenase 2 (EC 1.13.-.-) (Aci-reductone dioxygenase 2) (Submergence-induced protein 2A) - Oryza sativa (Rice) & (loc_os03g06620.1 : 401.0) no description available & (at4g14710 : 337.0) ATARD2; FUNCTIONS IN: acireductone dioxygenase [iron(II)-requiring] activity, metal ion binding; INVOLVED IN: oxidation reduction, L-methion…
'16.2.1.1'	'secondary metabolism.phenylpropanoids.lignin biosynthesis.PAL'	HORVU6Hr1G058820,3	12.4576	0	'(p14717|pal1_orysa : 1240.0) Phenylalanine ammonia-lyase (EC 4.3.1.5) - Oryza sativa (Rice) & (loc_os02g41630.2 : 1240.0) no description available & (at2g37040 : 969.0) Encodes PAL1, a phenylalanine ammonia-lyase. Arabidopsis has four PALs: AT2G37040 (PAL1), AT3G53260 (PAL2), AT5G04230 (PAL3) and AT3G10340 (PAL4).; PHE ammonia lyase 1 (PAL1); FUNCTIONS IN: phenylalanine ammonia-lyase activity; I…
'16.2.1.1'	'secondary metabolism.phenylpropanoids.lignin biosynthesis.PAL'	HORVU6Hr1G058820,9	9.82496	1.85957e-185	'(p14717|pal1_orysa : 1240.0) Phenylalanine ammonia-lyase (EC 4.3.1.5) - Oryza sativa (Rice) & (loc_os02g41630.2 : 1240.0) no description available & (at2g37040 : 969.0) Encodes PAL1, a phenylalanine ammonia-lyase. Arabidopsis has four PALs: AT2G37040 (PAL1), AT3G53260 (PAL2), AT5G04230 (PAL3) and AT3G10340 (PAL4).; PHE ammonia lyase 1 (PAL1); FUNCTIONS IN: phenylalanine ammonia-lyase activity; I…
'16.2.1.10'	'secondary metabolism.phenylpropanoids.lignin biosynthesis.CAD'	HORVU0Hr1G012860,1	10.2021	8.66218e-79	'(loc_os09g23550.2 : 282.0) no description available & (p93257|mtdh_mescr : 218.0) Probable mannitol dehydrogenase (EC 1.1.1.255) (NAD-dependent mannitol dehydrogenase) - Mesembryanthemum crystallinum (Common ice plant) & (at4g37980 : 202.0) elicitor-activated gene 3-1 (ELI3-1); FUNCTIONS IN: oxidoreductase activity, zinc ion binding; INVOLVED IN: response to bacterium, plant-type hypersensitive …
'16.5.1.1.1.10'	'secondary metabolism.sulfur-containing.glucosinolates.synthesis.aliphatic.flavin-containing monooxygenase'	HORVU6Hr1G029800,4	10.0238	8.24646e-86	'(loc_os10g40570.1 : 395.0) no description available & (at1g62600 : 336.0) Flavin-binding monooxygenase family protein; FUNCTIONS IN: NADP or NADPH binding, monooxygenase activity, FAD binding, flavin-containing monooxygenase activity; INVOLVED IN: oxidation reduction; LOCATED IN: vacuole; CONTAINS InterPro DOMAIN/s: Flavin-containing monooxygenase FMO (InterPro:IPR000960), Flavin-containing mono…
'16.8.2.1'	'secondary metabolism.flavonoids.chalcones.naringenin-chalcone synthase'	HORVU4Hr1G067780,3	10.7228	3.88304e-108	'(p53415|chs2_secce : 610.0) Chalcone synthase 2 (EC 2.3.1.74) (Naringenin-chalcone synthase 2) - Secale cereale (Rye) & (loc_os11g32650.1 : 579.0) no description available & (at5g13930 : 538.0) Encodes chalcone synthase (CHS), a key enzyme involved in the biosynthesis of flavonoids. Required for the accumulation of purple anthocyanins in leaves and stems. Also involved in the regulation of auxin…
'16.8.2.1'	'secondary metabolism.flavonoids.chalcones.naringenin-chalcone synthase'	HORVU4Hr1G070250,3	10.2761	2.54148e-55	'(p53415|chs2_secce : 135.0) Chalcone synthase 2 (EC 2.3.1.74) (Naringenin-chalcone synthase 2) - Secale cereale (Rye) & (loc_os11g32650.1 : 125.0) no description available & (at5g13930 : 98.6) Encodes chalcone synthase (CHS), a key enzyme involved in the biosynthesis of flavonoids. Required for the accumulation of purple anthocyanins in leaves and stems. Also involved in the regulation of auxin …
'16.8.2.1'	'secondary metabolism.flavonoids.chalcones.naringenin-chalcone synthase'	HORVU4Hr1G083960,7	10.2167	1.74067e-137	'(p53415|chs2_secce : 610.0) Chalcone synthase 2 (EC 2.3.1.74) (Naringenin-chalcone synthase 2) - Secale cereale (Rye) & (loc_os11g32650.1 : 579.0) no description available & (at5g13930 : 538.0) Encodes chalcone synthase (CHS), a key enzyme involved in the biosynthesis of flavonoids. Required for the accumulation of purple anthocyanins in leaves and stems. Also involved in the regulation of auxin…
'16.8.2.1'	'secondary metabolism.flavonoids.chalcones.naringenin-chalcone synthase'	HORVU5Hr1G048630,6	10.8408	6.77472e-186	'(p53415|chs2_secce : 146.0) Chalcone synthase 2 (EC 2.3.1.74) (Naringenin-chalcone synthase 2) - Secale cereale (Rye) & (loc_os11g32650.1 : 135.0) no description available & (at5g13930 : 108.0) Encodes chalcone synthase (CHS), a key enzyme involved in the biosynthesis of flavonoids. Required for the accumulation of purple anthocyanins in leaves and stems. Also involved in the regulation of auxin…
'16.8.2.1'	'secondary metabolism.flavonoids.chalcones.naringenin-chalcone synthase'	HORVU4Hr1G004210,15	10.8041	9.9286e-180	'(p53415|chs2_secce : 610.0) Chalcone synthase 2 (EC 2.3.1.74) (Naringenin-chalcone synthase 2) - Secale cereale (Rye) & (loc_os11g32650.1 : 579.0) no description available & (at5g13930 : 538.0) Encodes chalcone synthase (CHS), a key enzyme involved in the biosynthesis of flavonoids. Required for the accumulation of purple anthocyanins in leaves and stems. Also involved in the regulation of auxin…
'16.8.2.1'	'secondary metabolism.flavonoids.chalcones.naringenin-chalcone synthase'	HORVU4Hr1G011500,4	11.2946	4.31686e-203	'(p53415|chs2_secce : 610.0) Chalcone synthase 2 (EC 2.3.1.74) (Naringenin-chalcone synthase 2) - Secale cereale (Rye) & (loc_os11g32650.1 : 579.0) no description available & (at5g13930 : 538.0) Encodes chalcone synthase (CHS), a key enzyme involved in the biosynthesis of flavonoids. Required for the accumulation of purple anthocyanins in leaves and stems. Also involved in the regulation of auxin…
'16.8.2.1'	'secondary metabolism.flavonoids.chalcones.naringenin-chalcone synthase'	HORVU4Hr1G037030,1	11.1196	0	'(p53415|chs2_secce : 754.0) Chalcone synthase 2 (EC 2.3.1.74) (Naringenin-chalcone synthase 2) - Secale cereale (Rye) & (loc_os11g32650.1 : 713.0) no description available & (at5g13930 : 643.0) Encodes chalcone synthase (CHS), a key enzyme involved in the biosynthesis of flavonoids. Required for the accumulation of purple anthocyanins in leaves and stems. Also involved in the regulation of auxin…
'16.8.4'	'secondary metabolism.flavonoids.flavonols'	HORVU7Hr1G028840,14	10.1898	6.31642e-225	'(loc_os06g08041.1 : 117.0) no description available & (at5g54000 : 96.3) 2-oxoglutarate (2OG) and Fe(II)-dependent oxygenase superfamily protein; FUNCTIONS IN: oxidoreductase activity, acting on paired donors, with incorporation or reduction of molecular oxygen, 2-oxoglutarate as one donor, and incorporation of one atom each of oxygen into both donors, oxidoreductase activity; INVOLVED IN: biolo…
'16.8.4'	'secondary metabolism.flavonoids.flavonols'	HORVU7Hr1G038510,2	4.9542	0	'(loc_os10g09990.1 : 707.0) no description available & (at2g36800 : 372.0) Encodes a DON-Glucosyltransferase. The UGT73C5 glucosylates both brassinolide and castasterone in the 23-O position. The enzyme is presumably involved in the homeostasis of those steroid hormones hence regulating BR activity. Transgenic plants overexpressing UGT73C5 show a typical BR-deficient phenotype.; don-glucosyltrans…
'16.8.4'	'secondary metabolism.flavonoids.flavonols'	HORVU7Hr1G038510,2	7.18982	5.32018e-22	'(loc_os10g09990.1 : 707.0) no description available & (at2g36800 : 372.0) Encodes a DON-Glucosyltransferase. The UGT73C5 glucosylates both brassinolide and castasterone in the 23-O position. The enzyme is presumably involved in the homeostasis of those steroid hormones hence regulating BR activity. Transgenic plants overexpressing UGT73C5 show a typical BR-deficient phenotype.; don-glucosyltrans…
'17'	'hormone metabolism'	HORVU3Hr1G098290,5	9.91737	5.59322e-54	'(loc_os11g30040.1 : 151.0) no description available & (q43360|pir7b_orysa : 127.0) Esterase PIR7B (EC 3.1.-.-) - Oryza sativa (Rice) & (at2g23610 : 102.0) Encodes a protein shown to have carboxylesterase activity, methyl IAA esterase activity, and methyl jasmonate esterase activity in vitro. This protein does not act on methyl salicylate, MeGA4, or MEGA9 in vitro.; methyl esterase 3 (MES3); CONT…
'17.1.1.1.11'	'hormone metabolism.abscisic acid.synthesis-degradation.synthesis.short chain alcohol dehydrogenmase (ABA2)'	HORVU3Hr1G046320,1	9.95128	5.39744e-44	'(loc_os03g59610.1 : 420.0) no description available & (at1g52340 : 291.0) Encodes a cytosolic short-chain dehydrogenase/reductase involved in the conversion of xanthoxin to ABA-aldehyde during ABA biosynthesis. Mutants are insensitive to sucrose and glucose.; ABA DEFICIENT 2 (ABA2); CONTAINS InterPro DOMAIN/s: NAD(P)-binding domain (InterPro:IPR016040), Glucose/ribitol dehydrogenase (InterPro:IP…
'17.2.2'	'hormone metabolism.auxin.signal transduction'	HORVU3Hr1G094000,3	9.72281	1.46596e-137	'(q5jlm1|pin6_orysa : 381.0) Probable auxin efflux carrier component 6 (OsPIN6) - Oryza sativa (Rice) & (loc_os01g69070.1 : 381.0) no description available & (at5g16530 : 260.0) Encodes PIN5, an atypical member of the PIN family. PIN5 is a functional auxin transporter that is required for auxin-mediated development. PIN5 does not have a direct role in cell-to-cell transport but regulates intracel…
'17.2.3'	'hormone metabolism.auxin.induced-regulated-responsive-activated'	HORVU1Hr1G073150,1	9.98299	9.058e-69	'(loc_os05g37880.1 : 803.0) no description available & (at2g37980 : 622.0) O-fucosyltransferase family protein; FUNCTIONS IN: molecular_function unknown; INVOLVED IN: biological_process unknown; LOCATED IN: chloroplast; EXPRESSED IN: 13 plant structures; EXPRESSED DURING: L mature pollen stage, M germinated pollen stage, 4 anthesis, petal differentiation and expansion stage; CONTAINS InterPro DOM…
'17.4.1'	'hormone metabolism.cytokinin.synthesis-degradation'	HORVU1Hr1G011480,1	5.32193	8.87614e-24	'(loc_os03g24240.1 : 389.0) no description available & (at3g63110 : 229.0) Encodes cytokinin synthase involved in cytokinin biosynthesis. IPT3 subcellular localization is modulated by farnesylation- when farnesylated it is localized to the nucleus, otherwise to the chloroplast.; isopentenyltransferase 3 (IPT3); CONTAINS InterPro DOMAIN/s: tRNA isopentenyltransferase (InterPro:IPR002627); BEST Ara…
'17.4.1'	'hormone metabolism.cytokinin.synthesis-degradation'	HORVU1Hr1G042360,7	7.49985	3.67641e-20	'(loc_os10g34230.1 : 907.0) no description available & (at2g41510 : 408.0) It encodes a protein whose sequence is similar to cytokinin oxidase/dehydrogenase, which catalyzes the degradation of cytokinins.; cytokinin oxidase/dehydrogenase 1 (CKX1); FUNCTIONS IN: cytokinin dehydrogenase activity; INVOLVED IN: N-terminal protein myristoylation, cytokinin catabolic process, meristem development; LOCA…
'17.4.1'	'hormone metabolism.cytokinin.synthesis-degradation'	HORVU2Hr1G004720,3	4.70044	8.85606e-07	'(loc_os02g36830.1 : 383.0) no description available & (at1g22400 : 274.0) UGT85A1; FUNCTIONS IN: in 6 functions; INVOLVED IN: metabolic process; LOCATED IN: cellular_component unknown; EXPRESSED IN: 22 plant structures; EXPRESSED DURING: 10 growth stages; CONTAINS InterPro DOMAIN/s: UDP-glucuronosyl/UDP-glucosyltransferase (InterPro:IPR002213); BEST Arabidopsis thaliana protein match is: UDP-glu…
'17.4.1'	'hormone metabolism.cytokinin.synthesis-degradation'	HORVU2Hr1G004720,3	4.70044	8.85606e-07	'(loc_os02g36830.1 : 383.0) no description available & (at1g22400 : 274.0) UGT85A1; FUNCTIONS IN: in 6 functions; INVOLVED IN: metabolic process; LOCATED IN: cellular_component unknown; EXPRESSED IN: 22 plant structures; EXPRESSED DURING: 10 growth stages; CONTAINS InterPro DOMAIN/s: UDP-glucuronosyl/UDP-glucosyltransferase (InterPro:IPR002213); BEST Arabidopsis thaliana protein match is: UDP-glu…
'17.4.1'	'hormone metabolism.cytokinin.synthesis-degradation'	HORVU1Hr1G042360,7	6.14975	4.85028e-14	'(loc_os10g34230.1 : 641.0) no description available & (at2g41510 : 330.0) It encodes a protein whose sequence is similar to cytokinin oxidase/dehydrogenase, which catalyzes the degradation of cytokinins.; cytokinin oxidase/dehydrogenase 1 (CKX1); FUNCTIONS IN: cytokinin dehydrogenase activity; INVOLVED IN: N-terminal protein myristoylation, cytokinin catabolic process, meristem development; LOCA…
'17.4.1'	'hormone metabolism.cytokinin.synthesis-degradation'	HORVU2Hr1G004720,3	6.08746	1.17531e-11	'(loc_os02g36830.1 : 646.0) no description available & (at1g22360 : 471.0) UDP-glucosyl transferase 85A2 (UGT85A2); FUNCTIONS IN: UDP-glycosyltransferase activity, transferase activity, transferring glycosyl groups, glucuronosyltransferase activity; INVOLVED IN: metabolic process; LOCATED IN: cellular_component unknown; EXPRESSED IN: 21 plant structures; EXPRESSED DURING: 11 growth stages; CONTAI…
'17.4.1'	'hormone metabolism.cytokinin.synthesis-degradation'	HORVU2Hr1G004720,4	5.55459	6.19552e-07	'(loc_os02g36830.1 : 646.0) no description available & (at1g22360 : 471.0) UDP-glucosyl transferase 85A2 (UGT85A2); FUNCTIONS IN: UDP-glycosyltransferase activity, transferase activity, transferring glycosyl groups, glucuronosyltransferase activity; INVOLVED IN: metabolic process; LOCATED IN: cellular_component unknown; EXPRESSED IN: 21 plant structures; EXPRESSED DURING: 11 growth stages; CONTAI…
'17.4.1'	'hormone metabolism.cytokinin.synthesis-degradation'	HORVU3Hr1G027430,1	4.39232	0.00014566	'(loc_os01g10110.1 : 305.0) no description available & (at5g56970 : 204.0) It encodes a protein whose sequence is similar to cytokinin oxidase/dehydrogenase, which catalyzes the degradation of cytokinins.; cytokinin oxidase 3 (CKX3); FUNCTIONS IN: primary amine oxidase activity, cytokinin dehydrogenase activity; INVOLVED IN: cytokinin catabolic process; LOCATED IN: vacuole; EXPRESSED IN: 14 plant…
'17.5.3'	'hormone metabolism.ethylene.induced-regulated-responsive-activated'	HORVU3Hr1G018850,5	9.72622	1.26467e-106	'(loc_os01g10050.1 : 570.0) no description available & (at1g55150 : 493.0) DEA(D/H)-box RNA helicase family protein; FUNCTIONS IN: helicase activity, ATP-dependent helicase activity, ATP binding, nucleic acid binding; LOCATED IN: cellular_component unknown; EXPRESSED IN: 22 plant structures; EXPRESSED DURING: 13 growth stages; CONTAINS InterPro DOMAIN/s: RNA helicase, DEAD-box type, Q motif (Inte…
'17.6.1.2'	'hormone metabolism.gibberelin.synthesis-degradation.ent-kaurene synthase'	HORVU4Hr1G061030,1	10.7099	3.45354e-85	'(loc_os04g52230.1 : 526.0) no description available & (q39548|ksb_cucma : 355.0) Ent-kaurene synthase B, chloroplast precursor (EC 4.2.3.19) (KSB) - Cucurbita maxima (Pumpkin) (Winter squash) & (at1g79460 : 343.0) Encodes for a protein with ent-kaurene synthase B activity which catalyzes the second step in the cyclization of GGPP to ent-kaurene in the gibberellins biosynthetic pathway.; GA REQUI…
'17.6.1.2'	'hormone metabolism.gibberelin.synthesis-degradation.ent-kaurene synthase'	HORVU4Hr1G062880,2	10.4094	4.31686e-203	'(loc_os04g52230.1 : 654.0) no description available & (at1g79460 : 397.0) Encodes for a protein with ent-kaurene synthase B activity which catalyzes the second step in the cyclization of GGPP to ent-kaurene in the gibberellins biosynthetic pathway.; GA REQUIRING 2 (GA2); FUNCTIONS IN: ent-kaurene synthase activity; INVOLVED IN: gibberellin biosynthetic process, gibberellic acid mediated signalin…
'17.6.1.2'	'hormone metabolism.gibberelin.synthesis-degradation.ent-kaurene synthase'	HORVU4Hr1G068460,2	10.3231	9.2801e-73	'(loc_os04g52230.1 : 325.0) no description available & (at1g79460 : 230.0) Encodes for a protein with ent-kaurene synthase B activity which catalyzes the second step in the cyclization of GGPP to ent-kaurene in the gibberellins biosynthetic pathway.; GA REQUIRING 2 (GA2); FUNCTIONS IN: ent-kaurene synthase activity; INVOLVED IN: gibberellin biosynthetic process, gibberellic acid mediated signalin…
'17.6.1.2'	'hormone metabolism.gibberelin.synthesis-degradation.ent-kaurene synthase'	HORVU4Hr1G069760,18	11.5122	0	'(loc_os04g52230.1 : 1027.0) no description available & (at1g79460 : 654.0) Encodes for a protein with ent-kaurene synthase B activity which catalyzes the second step in the cyclization of GGPP to ent-kaurene in the gibberellins biosynthetic pathway.; GA REQUIRING 2 (GA2); FUNCTIONS IN: ent-kaurene synthase activity; INVOLVED IN: gibberellin biosynthetic process, gibberellic acid mediated signali…
'17.6.1.2'	'hormone metabolism.gibberelin.synthesis-degradation.ent-kaurene synthase'	HORVU4Hr1G073730,4	10.7142	3.03326e-156	'(loc_os04g52230.1 : 404.0) no description available & (at1g79460 : 261.0) Encodes for a protein with ent-kaurene synthase B activity which catalyzes the second step in the cyclization of GGPP to ent-kaurene in the gibberellins biosynthetic pathway.; GA REQUIRING 2 (GA2); FUNCTIONS IN: ent-kaurene synthase activity; INVOLVED IN: gibberellin biosynthetic process, gibberellic acid mediated signalin…
'17.6.1.2'	'hormone metabolism.gibberelin.synthesis-degradation.ent-kaurene synthase'	HORVU4Hr1G075310,5	10.388	0	'(loc_os04g52230.1 : 701.0) no description available & (at1g79460 : 461.0) Encodes for a protein with ent-kaurene synthase B activity which catalyzes the second step in the cyclization of GGPP to ent-kaurene in the gibberellins biosynthetic pathway.; GA REQUIRING 2 (GA2); FUNCTIONS IN: ent-kaurene synthase activity; INVOLVED IN: gibberellin biosynthetic process, gibberellic acid mediated signalin…
'17.6.1.2'	'hormone metabolism.gibberelin.synthesis-degradation.ent-kaurene synthase'	HORVU4Hr1G088880,23	10.8234	0	'(loc_os04g52230.1 : 1027.0) no description available & (at1g79460 : 655.0) Encodes for a protein with ent-kaurene synthase B activity which catalyzes the second step in the cyclization of GGPP to ent-kaurene in the gibberellins biosynthetic pathway.; GA REQUIRING 2 (GA2); FUNCTIONS IN: ent-kaurene synthase activity; INVOLVED IN: gibberellin biosynthetic process, gibberellic acid mediated signali…
'17.6.1.2'	'hormone metabolism.gibberelin.synthesis-degradation.ent-kaurene synthase'	HORVU5Hr1G007910,1	11.0423	2.36656e-145	'(loc_os04g52230.1 : 508.0) no description available & (at1g79460 : 323.0) Encodes for a protein with ent-kaurene synthase B activity which catalyzes the second step in the cyclization of GGPP to ent-kaurene in the gibberellins biosynthetic pathway.; GA REQUIRING 2 (GA2); FUNCTIONS IN: ent-kaurene synthase activity; INVOLVED IN: gibberellin biosynthetic process, gibberellic acid mediated signalin…
'17.6.1.2'	'hormone metabolism.gibberelin.synthesis-degradation.ent-kaurene synthase'	HORVU5Hr1G012510,6	10.7406	2.69248e-103	'(loc_os04g52230.1 : 505.0) no description available & (at1g79460 : 323.0) Encodes for a protein with ent-kaurene synthase B activity which catalyzes the second step in the cyclization of GGPP to ent-kaurene in the gibberellins biosynthetic pathway.; GA REQUIRING 2 (GA2); FUNCTIONS IN: ent-kaurene synthase activity; INVOLVED IN: gibberellin biosynthetic process, gibberellic acid mediated signalin…
'17.6.1.2'	'hormone metabolism.gibberelin.synthesis-degradation.ent-kaurene synthase'	HORVU5Hr1G022140,2	11.1309	0	'(loc_os04g52230.1 : 433.0) no description available & (q39548|ksb_cucma : 313.0) Ent-kaurene synthase B, chloroplast precursor (EC 4.2.3.19) (KSB) - Cucurbita maxima (Pumpkin) (Winter squash) & (at1g79460 : 308.0) Encodes for a protein with ent-kaurene synthase B activity which catalyzes the second step in the cyclization of GGPP to ent-kaurene in the gibberellins biosynthetic pathway.; GA REQUI…
'17.6.1.2'	'hormone metabolism.gibberelin.synthesis-degradation.ent-kaurene synthase'	HORVU5Hr1G023990,15	10.7356	2.02964e-141	'(loc_os04g52230.1 : 526.0) no description available & (q39548|ksb_cucma : 355.0) Ent-kaurene synthase B, chloroplast precursor (EC 4.2.3.19) (KSB) - Cucurbita maxima (Pumpkin) (Winter squash) & (at1g79460 : 341.0) Encodes for a protein with ent-kaurene synthase B activity which catalyzes the second step in the cyclization of GGPP to ent-kaurene in the gibberellins biosynthetic pathway.; GA REQUI…
'17.6.1.2'	'hormone metabolism.gibberelin.synthesis-degradation.ent-kaurene synthase'	HORVU5Hr1G025430,10	10.5088	0	'(loc_os04g52230.1 : 544.0) no description available & (q39548|ksb_cucma : 333.0) Ent-kaurene synthase B, chloroplast precursor (EC 4.2.3.19) (KSB) - Cucurbita maxima (Pumpkin) (Winter squash) & (at1g79460 : 332.0) Encodes for a protein with ent-kaurene synthase B activity which catalyzes the second step in the cyclization of GGPP to ent-kaurene in the gibberellins biosynthetic pathway.; GA REQUI…
'17.6.1.2'	'hormone metabolism.gibberelin.synthesis-degradation.ent-kaurene synthase'	HORVU5Hr1G041880,3	10.3837	1.0231e-73	'(loc_os04g52230.1 : 814.0) no description available & (at1g79460 : 508.0) Encodes for a protein with ent-kaurene synthase B activity which catalyzes the second step in the cyclization of GGPP to ent-kaurene in the gibberellins biosynthetic pathway.; GA REQUIRING 2 (GA2); FUNCTIONS IN: ent-kaurene synthase activity; INVOLVED IN: gibberellin biosynthetic process, gibberellic acid mediated signalin…
'17.6.1.2'	'hormone metabolism.gibberelin.synthesis-degradation.ent-kaurene synthase'	HORVU5Hr1G048010,11	10.2372	0	'(loc_os04g52240.1 : 520.0) no description available & (at1g79460 : 340.0) Encodes for a protein with ent-kaurene synthase B activity which catalyzes the second step in the cyclization of GGPP to ent-kaurene in the gibberellins biosynthetic pathway.; GA REQUIRING 2 (GA2); FUNCTIONS IN: ent-kaurene synthase activity; INVOLVED IN: gibberellin biosynthetic process, gibberellic acid mediated signalin…
'17.6.1.2'	'hormone metabolism.gibberelin.synthesis-degradation.ent-kaurene synthase'	HORVU5Hr1G049630,7	10.5812	8.66218e-79	'(loc_os04g52230.1 : 710.0) no description available & (at1g79460 : 436.0) Encodes for a protein with ent-kaurene synthase B activity which catalyzes the second step in the cyclization of GGPP to ent-kaurene in the gibberellins biosynthetic pathway.; GA REQUIRING 2 (GA2); FUNCTIONS IN: ent-kaurene synthase activity; INVOLVED IN: gibberellin biosynthetic process, gibberellic acid mediated signalin…
'17.6.1.2'	'hormone metabolism.gibberelin.synthesis-degradation.ent-kaurene synthase'	HORVU4Hr1G000020,2	10.9211	5.6073e-97	'(loc_os04g52230.1 : 467.0) no description available & (at1g79460 : 291.0) Encodes for a protein with ent-kaurene synthase B activity which catalyzes the second step in the cyclization of GGPP to ent-kaurene in the gibberellins biosynthetic pathway.; GA REQUIRING 2 (GA2); FUNCTIONS IN: ent-kaurene synthase activity; INVOLVED IN: gibberellin biosynthetic process, gibberellic acid mediated signalin…
'17.6.1.2'	'hormone metabolism.gibberelin.synthesis-degradation.ent-kaurene synthase'	HORVU4Hr1G011790,6	10.6777	2.89486e-182	'(loc_os04g52230.1 : 422.0) no description available & (at1g79460 : 269.0) Encodes for a protein with ent-kaurene synthase B activity which catalyzes the second step in the cyclization of GGPP to ent-kaurene in the gibberellins biosynthetic pathway.; GA REQUIRING 2 (GA2); FUNCTIONS IN: ent-kaurene synthase activity; INVOLVED IN: gibberellin biosynthetic process, gibberellic acid mediated signalin…
'17.7.1.2'	'hormone metabolism.jasmonate.synthesis-degradation.lipoxygenase'	HORVU4Hr1G005920,5	9.76818	4.21418e-210	'(q53rb0|lox4_orysa : 1419.0) Probable lipoxygenase 4 (EC 1.13.11.12) - Oryza sativa (Rice) & (loc_os03g49380.1 : 1419.0) no description available & (at1g55020 : 1015.0) lipoxygenase, a defense gene conferring resistance Xanthomonas campestris; lipoxygenase 1 (LOX1); CONTAINS InterPro DOMAIN/s: Lipoxygenase, iron binding site (InterPro:IPR020833), Lipoxygenase, C-terminal (InterPro:IPR013819), Li…
'20.1'	'stress.biotic'	HORVU3Hr1G055650,6	9.83289	6.85508e-99	'(loc_os01g43370.2 : 875.0) no description available & (at1g64140 : 569.0) BEST Arabidopsis thaliana protein match is: loricrin-related (TAIR:AT5G64550.1); Has 3596 Blast hits to 2004 proteins in 150 species: Archae - 0; Bacteria - 54; Metazoa - 1597; Fungi - 38; Plants - 513; Viruses - 9; Other Eukaryotes - 1385 (source: NCBI BLink). & (reliability: 1138.0) & (original description: no original d…
'20.1.7'	'stress.biotic.PR-proteins'	HORVU6Hr1G093470,32	10.0715	2.44646e-37	'(loc_os04g53160.1 : 659.0) no description available & (at3g14470 : 212.0) NB-ARC domain-containing disease resistance protein; FUNCTIONS IN: protein binding; INVOLVED IN: apoptosis, defense response; LOCATED IN: endomembrane system; EXPRESSED IN: 23 plant structures; EXPRESSED DURING: 14 growth stages; CONTAINS InterPro DOMAIN/s: Leucine-rich repeat-containing protein (InterPro:IPR015766), NB-AR…
'20.2.1'	'stress.abiotic.heat'	HORVU4Hr1G061700,4	11.5127	7.48186e-165	'(loc_os03g15480.1 : 364.0) no description available & (at5g22080 : 305.0) Chaperone DnaJ-domain superfamily protein; FUNCTIONS IN: heat shock protein binding; INVOLVED IN: protein folding; LOCATED IN: cellular_component unknown; CONTAINS InterPro DOMAIN/s: Heat shock protein DnaJ, N-terminal (InterPro:IPR001623); BEST Arabidopsis thaliana protein match is: DNAJ heat shock N-terminal domain-conta…
'20.2.1'	'stress.abiotic.heat'	HORVU5Hr1G072420,4	12.4359	0	'(q07078|hsp83_orysa : 1163.0) Heat shock protein 81-3 (HSP81-3) (Gravity-specific protein GSC 381) - Oryza sativa (Rice) & (loc_os09g30439.1 : 1163.0) no description available & (at5g56030 : 1130.0) A member of heat shock protein 90 (HSP90) gene family. Expressed in all tissues and abundant in root apical meristem, pollen and tapetum. Expression is NOT heat-induced but induced by IAA and NaCl. I…
'20.2.2'	'stress.abiotic.cold'	HORVU1Hr1G064210,1	9.72451	4.39812e-82	'(loc_os08g03520.1 : 170.0) no description available & (at4g36020 : 141.0) Encodes a cold shock domain protein. Involved in cold acclimation by blocking the secondary structure of mRNA which in turn facilitates translation at cold temperature.; cold shock domain protein 1 (CSDP1); CONTAINS InterPro DOMAIN/s: Nucleic acid-binding, OB-fold (InterPro:IPR012340), Cold-shock conserved site (InterPro:I…
'21.2.1.2'	'redox.ascorbate and glutathione.ascorbate.GDP-L-galactose-hexose-1-phosphate guanyltransferase'	HORVU4Hr1G017030,9	9.89178	1.29824e-87	'(loc_os12g08810.1 : 664.0) no description available & (at5g55120 : 533.0) Encodes a GDP-L-galactose phosphorylase, with similar biochemical properties as VTC2.; VITAMIN C DEFECTIVE 5 (VTC5); BEST Arabidopsis thaliana protein match is: mannose-1-phosphate guanylyltransferase (GDP)s;GDP-galactose:mannose-1-phosphate guanylyltransferases;GDP-galactose:glucose-1-phosphate guanylyltransferases;GDP-ga…
'23.1.2.9'	'nucleotide metabolism.synthesis.purine.AICAR transformylase'	HORVU3Hr1G098870,3	10.1712	3.1848e-200	'(loc_os08g10570.1 : 935.0) no description available & (at2g35040 : 846.0) AICARFT/IMPCHase bienzyme family protein; FUNCTIONS IN: phosphoribosylaminoimidazolecarboxamide formyltransferase activity, IMP cyclohydrolase activity, catalytic activity; INVOLVED IN: response to cold, purine nucleotide biosynthetic process; LOCATED IN: stromule; EXPRESSED IN: 23 plant structures; EXPRESSED DURING: 13 gr…
'23.2'	'nucleotide metabolism.degradation'	HORVU2Hr1G014130,20	9.85953	6.2808e-33	'(q84np7|ampd_orysa : 558.0) Probable AMP deaminase (EC 3.5.4.6) - Oryza sativa (Rice) & (loc_os07g49270.1 : 558.0) no description available & (at2g38280 : 414.0) Encodes a protein with in vitro AMP deaminase activity that is involved in embryogenesis. Homozygous mutant embryos fail to develop past the zygote stage.; EMBRYONIC FACTOR1 (FAC1); FUNCTIONS IN: AMP deaminase activity; INVOLVED IN: pur…
'23.4.10'	'nucleotide metabolism.phosphotransfer and pyrophosphatases.nucleoside diphosphate kinase'	HORVU1Hr1G055440,3	9.89633	2.97982e-98	'(loc_os10g41410.2 : 279.0) no description available & (p93554|ndk1_sacof : 271.0) Nucleoside diphosphate kinase 1 (EC 2.7.4.6) (Nucleoside diphosphate kinase I) (NDK I) (NDP kinase I) (NDPK I) (PP18) - Saccharum officinarum (Sugarcane) & (at4g09320 : 255.0) nucleoside diphosphate kinase type 1 (NDPK1) gene, complete; NDPK1; FUNCTIONS IN: nucleoside diphosphate kinase activity, ATP binding; INVOL…
'23.5.3'	'nucleotide metabolism.deoxynucleotide metabolism.cytosine deaminase'	HORVU0Hr1G012630,4	9.84392	6.44214e-35	'(loc_os09g04210.3 : 309.0) no description available & (at5g24670 : 161.0) Cytidine/deoxycytidylate deaminase family protein; FUNCTIONS IN: hydrolase activity, zinc ion binding, catalytic activity; INVOLVED IN: biological_process unknown; LOCATED IN: cellular_component unknown; EXPRESSED IN: 23 plant structures; EXPRESSED DURING: 13 growth stages; CONTAINS InterPro DOMAIN/s: CMP/dCMP deaminase, z…
'26.13'	'misc.acid and other phosphatases'	HORVU4Hr1G085050,2	9.98726	2.25586e-112	'(loc_os08g41880.1 : 1113.0) no description available & (at5g50400 : 863.0) purple acid phosphatase 27 (PAP27); FUNCTIONS IN: protein serine/threonine phosphatase activity, acid phosphatase activity; INVOLVED IN: biological_process unknown; LOCATED IN: endomembrane system; EXPRESSED IN: 24 plant structures; EXPRESSED DURING: 15 growth stages; CONTAINS InterPro DOMAIN/s: Purple acid phosphatase, N…
'26.17'	'misc.dynamin'	HORVU4Hr1G007880,2	9.79116	0	'(loc_os03g50520.2 : 155.0) no description available & (at1g14830 : 148.0) Encodes a dynamin-like protein that is involved in mitochondrial morphogenesis and pollen development. Protein is localized as speckles in the cytoplasm, partially co-localizes with mitochondrial markers, cell plate of dividing cells, and the tip of root hairs, root cap cells, and expanding part of trichoblasts.; DYNAMIN-l…
'26.2'	'misc.UDP glucosyl and glucoronyl transferases'	HORVU5Hr1G045700,21	9.8857	1.89233e-180	'(loc_os11g03160.1 : 978.0) no description available & (at2g38650 : 505.0) galacturonosyltransferase 7 (GAUT7); CONTAINS InterPro DOMAIN/s: Glycosyl transferase, family 8 (InterPro:IPR002495); BEST Arabidopsis thaliana protein match is: galacturonosyltransferase 4 (TAIR:AT5G47780.1). & (reliability: 1010.0) & (original description: no original description)'
'26.2'	'misc.UDP glucosyl and glucoronyl transferases'	HORVU7Hr1G105510,8	10.0154	2.3929e-109	'(loc_os06g46570.1 : 598.0) no description available & (at1g05170 : 502.0) Galactosyltransferase family protein; FUNCTIONS IN: transferase activity, transferring hexosyl groups, transferase activity, transferring glycosyl groups; INVOLVED IN: protein amino acid glycosylation; LOCATED IN: endomembrane system, membrane; EXPRESSED IN: 14 plant structures; EXPRESSED DURING: 4 anthesis, C globular sta…
'26.24'	'misc.GCN5-related N-acetyltransferase'	HORVU5Hr1G046260,2	9.87036	2.95966e-110	'(loc_os05g44020.1 : 191.0) no description available & (at4g19985 : 127.0) Acyl-CoA N-acyltransferases (NAT) superfamily protein; FUNCTIONS IN: N-acetyltransferase activity; INVOLVED IN: N-terminal protein myristoylation, metabolic process; EXPRESSED IN: 23 plant structures; EXPRESSED DURING: 15 growth stages; CONTAINS InterPro DOMAIN/s: GCN5-related N-acetyltransferase, C-terminal (InterPro:IPR0…
'26.28'	'misc.GDSL-motif lipase'	HORVU2Hr1G094330,5	11.5943	0	'(loc_os04g48800.1 : 451.0) no description available & (at5g41890 : 371.0) GDSL-like Lipase/Acylhydrolase superfamily protein; FUNCTIONS IN: lipase activity, hydrolase activity, acting on ester bonds, carboxylesterase activity; INVOLVED IN: lipid metabolic process; LOCATED IN: endomembrane system; EXPRESSED IN: flower; EXPRESSED DURING: petal differentiation and expansion stage; CONTAINS InterPro…
'26.3'	'misc.gluco-, galacto- and mannosidases'	HORVU5Hr1G073370,9	9.94837	2.27048e-146	'(loc_os09g31430.1 : 467.0) no description available & (at3g60130 : 308.0) beta glucosidase 16 (BGLU16); FUNCTIONS IN: cation binding, hydrolase activity, hydrolyzing O-glycosyl compounds, catalytic activity; INVOLVED IN: carbohydrate metabolic process; LOCATED IN: endomembrane system; EXPRESSED IN: 23 plant structures; EXPRESSED DURING: 13 growth stages; CONTAINS InterPro DOMAIN/s: Glycoside hyd…
'26.3'	'misc.gluco-, galacto- and mannosidases'	HORVU3Hr1G094450,1	9.72622	1.34878e-206	'(loc_os01g69210.1 : 1436.0) no description available & (at1g67490 : 985.0) Encodes an alpha-glucosidase I enzyme that catalyzes the first step in N-linked glycan processing. Localized to the endoplasmic reticulum (ER).; glucosidase 1 (GCS1); FUNCTIONS IN: alpha-glucosidase activity; INVOLVED IN: root epidermal cell differentiation, epidermal cell differentiation; LOCATED IN: endoplasmic reticulu…
'26.3.1'	'misc.gluco-, galacto- and mannosidases.alpha-galactosidase'	HORVU3Hr1G003540,1	11.0258	2.4405e-125	'(loc_os01g03950.1 : 1279.0) no description available & (at1g68560 : 1069.0) Encodes a bifunctional alpha-l-arabinofuranosidase/beta-d-xylosidase that belongs to family 3 of glycoside hydrolases.; alpha-xylosidase 1 (XYL1); FUNCTIONS IN: xyloglucan 1,6-alpha-xylosidase activity, xylan 1,4-beta-xylosidase activity, alpha-N-arabinofuranosidase activity, hydrolase activity, hydrolyzing O-glycosyl co…
'26.4.1'	'misc.beta 1,3 glucan hydrolases.glucan endo-1,3-beta-glucosidase'	HORVU0Hr1G021950,2	11.5483	3.2573e-176	'(loc_os06g40490.1 : 347.0) no description available & (at2g26600 : 263.0) Glycosyl hydrolase superfamily protein; FUNCTIONS IN: cation binding, hydrolase activity, hydrolyzing O-glycosyl compounds, catalytic activity; INVOLVED IN: carbohydrate metabolic process; LOCATED IN: anchored to membrane; EXPRESSED IN: 22 plant structures; EXPRESSED DURING: 13 growth stages; CONTAINS InterPro DOMAIN/s: Gl…
'27.1'	'RNA.processing'	HORVU7Hr1G120070,9	4.85798	3.32028e-05	'(loc_os06g51350.1 : 555.0) no description available & (at5g20040 : 435.0) Encodes tRNA isopentenyltransferase AtIPT9.; isopentenyltransferase 9 (IPT9); FUNCTIONS IN: tRNA dimethylallyltransferase activity, ATP binding; INVOLVED IN: tRNA processing, cytokinin biosynthetic process; EXPRESSED IN: 19 plant structures; EXPRESSED DURING: 13 growth stages; CONTAINS InterPro DOMAIN/s: tRNA delta(2)-isop…
'27.1.19'	'RNA.processing.ribonucleases'	HORVU1Hr1G010820,12	9.77314	2.0552e-34	'(loc_os01g62440.1 : 604.0) no description available & (at5g02250 : 446.0) Encodes a exoribonuclease involved in rRNA processing in mitochondria and chloroplasts.Loss of function mutations are pale green and require supplementation with sucrose for germination and early development. Plants are pale green due to defects in chloroplast biogenesis.; EMBRYO DEFECTIVE 2730 (EMB2730); FUNCTIONS IN: rib…
'27.1.2'	'RNA.processing.RNA helicase'	HORVU4Hr1G031280,3	9.77479	4.39016e-282	'(loc_os11g38670.1 : 844.0) no description available & (at2g42520 : 726.0) P-loop containing nucleoside triphosphate hydrolases superfamily protein; FUNCTIONS IN: helicase activity, nucleic acid binding, ATP binding, ATP-dependent helicase activity; LOCATED IN: peroxisome; EXPRESSED IN: 24 plant structures; EXPRESSED DURING: 15 growth stages; CONTAINS InterPro DOMAIN/s: RNA helicase, DEAD-box typ…
'27.3.17'	'RNA.regulation of transcription.CPP(Zn),CPP1-related transcription factor family'	HORVU5Hr1G013160,7	9.88722	1.08462e-102	'(loc_os12g41210.1 : 536.0) no description available & (at4g14770 : 154.0) TESMIN/TSO1-like CXC 2 (TCX2); FUNCTIONS IN: sequence-specific DNA binding transcription factor activity; INVOLVED IN: regulation of transcription; LOCATED IN: chloroplast; EXPRESSED IN: 16 plant structures; EXPRESSED DURING: 9 growth stages; CONTAINS InterPro DOMAIN/s: Tesmin/TSO1-like, CXC (InterPro:IPR005172); BEST Arab…
'27.3.2'	'RNA.regulation of transcription.Alfin-like'	HORVU3Hr1G090540,5	9.93811	7.0221e-92	'(loc_os01g66420.1 : 372.0) no description available & (at5g26210 : 303.0) AL4 encodes a member of the Alfin-Like family of nuclear-localized PhD domain containing homeodomain proteins. Binds to H3K4 di or trimethylated DNA.; alfin-like 4 (AL4); CONTAINS InterPro DOMAIN/s: Zinc finger, PHD-type, conserved site (InterPro:IPR019786), Zinc finger, PHD-type (InterPro:IPR001965), Protein of unknown fu…
'27.3.22'	'RNA.regulation of transcription.HB,Homeobox transcription factor family'	HORVU1Hr1G015720,6	10.0168	1.87217e-201	'(loc_os05g03884.1 : 410.0) no description available & (at1g23380 : 243.0) homeodomain transcription factor KNAT6, belonging to class I of KN transcription factor family (which also includes KNAT1 and KNAT2). Expression is increased in as and bop1 leaf mutants.; KNOTTED1-like homeobox gene 6 (KNAT6); FUNCTIONS IN: DNA binding, transcription activator activity, sequence-specific DNA binding transc…
'27.3.35'	'RNA.regulation of transcription.bZIP transcription factor family'	HORVU1Hr1G000140,4	10.1472	3.10114e-84	'(loc_os05g01030.1 : 1806.0) no description available & (at1g68710 : 1493.0) ATPase E1-E2 type family protein / haloacid dehalogenase-like hydrolase family protein; FUNCTIONS IN: ATPase activity, coupled to transmembrane movement of ions, phosphorylative mechanism; INVOLVED IN: metabolic process, phospholipid transport, ATP biosynthetic process; LOCATED IN: mitochondrion, integral to membrane, me…
'27.3.35'	'RNA.regulation of transcription.bZIP transcription factor family'	HORVU5Hr1G014170,29	9.94544	5.0302e-149	'(loc_os12g40920.2 : 220.0) no description available & (q99090|cprf2_petcr : 148.0) Light-inducible protein CPRF-2 - Petroselinum crispum (Parsley) (Petroselinum hortense) & (at3g54620 : 136.0) bZIP transcription factor-like protein mRNA; basic leucine zipper 25 (BZIP25); FUNCTIONS IN: protein heterodimerization activity, sequence-specific DNA binding transcription factor activity; INVOLVED IN: r…
'27.3.35'	'RNA.regulation of transcription.bZIP transcription factor family'	HORVU5Hr1G073410,5	10.1997	1.04273e-40	'(loc_os09g31390.2 : 616.0) no description available & (at5g06839 : 394.0) bZIP transcription factor family protein; FUNCTIONS IN: DNA binding, sequence-specific DNA binding transcription factor activity; INVOLVED IN: regulation of transcription, DNA-dependent; EXPRESSED IN: leaf whorl, root, flower, seed; EXPRESSED DURING: 4 anthesis, petal differentiation and expansion stage, E expanded cotyled…
'27.3.36'	'RNA.regulation of transcription.Argonaute'	HORVU3Hr1G038830,20	11.5817	0	'(loc_os01g16870.4 : 1536.0) no description available & (at2g27040 : 1186.0) AGO4 is a member of a class of PAZ/PIWI domain containing proteins involved in siRNA mediated gene silencing.Loss of function mutations have reduced site specific CpNpG and CpHpH methylation and increased susceptibility to bacterial pathogens.; ARGONAUTE 4 (AGO4); CONTAINS InterPro DOMAIN/s: Domain of unknown function DU…
'27.3.36'	'RNA.regulation of transcription.Argonaute'	HORVU3Hr1G038830,20	11.5817	0	'(loc_os01g16870.4 : 1536.0) no description available & (at2g27040 : 1186.0) AGO4 is a member of a class of PAZ/PIWI domain containing proteins involved in siRNA mediated gene silencing.Loss of function mutations have reduced site specific CpNpG and CpHpH methylation and increased susceptibility to bacterial pathogens.; ARGONAUTE 4 (AGO4); CONTAINS InterPro DOMAIN/s: Domain of unknown function DU…
'27.3.4'	'RNA.regulation of transcription.ARF, Auxin Response Factor family'	HORVU2Hr1G089660,2	9.86109	1.38848e-54	'(loc_os02g41800.2 : 144.0) no description available & (at2g28350 : 132.0) Involved in root cap cell differentiation.; auxin response factor 10 (ARF10); FUNCTIONS IN: sequence-specific DNA binding transcription factor activity, miRNA binding; INVOLVED IN: in 13 processes; LOCATED IN: nucleus; EXPRESSED IN: 25 plant structures; EXPRESSED DURING: 15 growth stages; CONTAINS InterPro DOMAIN/s: Aux/IA…
'27.3.41'	'RNA.regulation of transcription.B3 transcription factor family'	HORVU4Hr1G012100,1	9.72792	1.11126e-16	'(loc_os12g40070.1 : 141.0) no description available & (at4g33280 : 94.7) AP2/B3-like transcriptional factor family protein; FUNCTIONS IN: DNA binding, sequence-specific DNA binding transcription factor activity; INVOLVED IN: regulation of transcription, DNA-dependent; LOCATED IN: vacuole; CONTAINS InterPro DOMAIN/s: Transcriptional factor B3 (InterPro:IPR003340); BEST Arabidopsis thaliana protei…
'27.3.55'	'RNA.regulation of transcription.HDA'	HORVU3Hr1G092390,1	9.8392	2.74174e-69	'(loc_os01g68104.1 : 131.0) no description available & (o24591|hd2a_maize : 120.0) Histone deacetylase 2a (HD2a) (Zm-HD2a) (Nucleolar histone deacetylase HD2-p39) - Zea mays (Maize) & (at5g22650 : 92.0) Encodes a member of a plant-specific class of histone deacetylases. Controls the development of adaxial/abaxial leaf polarity. Its mRNA is widely expressed in stems, leaves, flowers and young sili…
'27.3.58'	'RNA.regulation of transcription.LUG'	HORVU6Hr1G089700,9	11.9535	5.95466e-228	'(loc_os02g56880.1 : 378.0) no description available & (at4g32551 : 277.0) LEUNIG regulates floral organ identity,gynoecium and ovule development. Negatively regulates AGAMOUS . Encodes a glutamine-rich protein with seven WD repeats similar to transcriptional corepressors.; LEUNIG (LUG); FUNCTIONS IN: transcription repressor activity, protein heterodimerization activity; INVOLVED IN: flower devel…
'27.3.60'	'RNA.regulation of transcription.NIN-like bZIP-related family'	HORVU2Hr1G095940,17	10.5324	3.5454e-278	'(loc_os04g47640.1 : 358.0) no description available & (at4g35590 : 150.0) RWP-RK domain-containing protein; FUNCTIONS IN: sequence-specific DNA binding transcription factor activity; INVOLVED IN: regulation of transcription; LOCATED IN: endomembrane system; EXPRESSED IN: 12 plant structures; EXPRESSED DURING: 4 anthesis, petal differentiation and expansion stage, LP.12 twelve leaves visible, D b…
'27.3.65'	'RNA.regulation of transcription.Polycomb Group (PcG)'	HORVU5Hr1G054730,18	10.1724	2.96326e-169	'(loc_os09g13630.1 : 908.0) no description available & (at5g51230 : 517.0) Polycomb group protein with zinc finger domain involved in negative regulation of reproductive development. Forms a complex with FIE, CLF, and MSI1. This complex modulates the expression of target genes including AG, PI and AP3.; EMBRYONIC FLOWER 2 (EMF2); CONTAINS InterPro DOMAIN/s: Zinc finger, C2H2-like (InterPro:IPR015…
'27.3.67'	'RNA.regulation of transcription.putative transcription regulator'	HORVU2Hr1G020690,8	9.77808	4.48388e-131	'(loc_os03g22740.1 : 742.0) no description available & (at3g05060 : 648.0) SAR DNA-binding protein, putative, strong similarity to SAR DNA-binding protein-1 (Pisum sativum) GI:3132696; contains Pfam profile PF01798: Putative snoRNA binding domain; encodes NOP58-like protein; NOP56-like pre RNA processing ribonucleoprotein; FUNCTIONS IN: DNA binding; INVOLVED IN: biological_process unknown; LOCATE…
'27.3.69'	'RNA.regulation of transcription.SET-domain transcriptional regulator family'	HORVU5Hr1G088420,8	9.98584	8.75858e-43	'(loc_os09g38440.1 : 927.0) no description available & (at1g05830 : 161.0) Encodes a homolog of trithorax, a histone-lysine N-methyltransferase. Paralog of ATX1. Unlike ATX1 which is involved in trimethylating of histone H3-mysine 4, ATX2 is involved in dimethylating of histone H3-lysine 4. ATX1 and ATX2 influence the expression of largely nonoverlapping gene sets. The expression pattern of ATX2 …
'27.3.99'	'RNA.regulation of transcription.unclassified'	HORVU4Hr1G048440,3	12.3859	0	'(loc_os03g25960.1 : 298.0) no description available & (at2g37220 : 266.0) Encodes a chloroplast RNA binding protein. A substrate of the type III effector HopU1 (mono-ADP-ribosyltransferase). Protein is tyrosine-phosphorylated and its phosphorylation state is modulated in response to ABA in Arabidopsis thaliana seeds.; RNA-binding (RRM/RBD/RNP motifs) family protein; FUNCTIONS IN: RNA binding, po…
'27.3.99'	'RNA.regulation of transcription.unclassified'	HORVU4Hr1G075700,8	9.90839	3.74258e-39	'(loc_os03g07800.1 : 581.0) no description available & (at5g19350 : 431.0) RNA-binding (RRM/RBD/RNP motifs) family protein; CONTAINS InterPro DOMAIN/s: RNA recognition motif, RNP-1 (InterPro:IPR000504), Nucleotide-binding, alpha-beta plait (InterPro:IPR012677); BEST Arabidopsis thaliana protein match is: RNA-binding protein 45A (TAIR:AT5G54900.1); Has 29846 Blast hits to 17541 proteins in 840 spe…
'27.4'	'RNA.RNA binding'	HORVU4Hr1G049680,7	10.1357	1.04802e-66	'(loc_os03g25970.2 : 763.0) no description available & (at5g15270 : 457.0) RNA-binding KH domain-containing protein; FUNCTIONS IN: RNA binding, nucleic acid binding; INVOLVED IN: biological_process unknown; LOCATED IN: cellular_component unknown; CONTAINS InterPro DOMAIN/s: K Homology, type 1, subgroup (InterPro:IPR018111), K Homology (InterPro:IPR004087), K Homology, type 1 (InterPro:IPR004088);…
'28.1'	'DNA.synthesis/chromatin structure'	HORVU1Hr1G036500,24	9.78627	9.29068e-40	'(loc_os02g30800.1 : 1645.0) no description available & (at1g08260 : 1617.0) Similar to POL2A, DNA polymerase epsilon catalytic subunit. Essential for Arabidopsis growth. Null homozygotes are embryo lethal, partial loss of function alleles show embryo patterning defects such as root pole displacement. Delayed progression through cell cycle results in embryos with smaller numbers of larger cells.;…
'28.1'	'DNA.synthesis/chromatin structure'	HORVU1Hr1G063700,14	9.78627	1.67506e-143	'(loc_os11g29380.1 : 1715.0) no description available & (at1g44900 : 1321.0) Encodes MCM2 (MINICHROMOSOME MAINTENANCE 2), a protein essential to embryo development. Overexpression results in altered root meristem function.; MINICHROMOSOME MAINTENANCE 2 (MCM2); FUNCTIONS IN: DNA-dependent ATPase activity, DNA binding, ATP binding; INVOLVED IN: in 7 processes; LOCATED IN: nuclear chromatin; EXPRESS…
'28.1'	'DNA.synthesis/chromatin structure'	HORVU2Hr1G035630,5	10.1886	2.28374e-135	'(loc_os07g39800.1 : 582.0) no description available & (at5g56780 : 216.0) effector of transcription2 (ET2); BEST Arabidopsis thaliana protein match is: unknown protein (TAIR:AT4G26170.1); Has 86 Blast hits to 52 proteins in 16 species: Archae - 0; Bacteria - 0; Metazoa - 0; Fungi - 0; Plants - 86; Viruses - 0; Other Eukaryotes - 0 (source: NCBI BLink). & (reliability: 432.0) & (original descript…
'28.1'	'DNA.synthesis/chromatin structure'	HORVU3Hr1G089480,4	10.0768	2.48726e-89	'(loc_os01g67250.1 : 373.0) no description available & (at5g16270 : 107.0) Encodes a SCC1/REC8 ortholog that may be involved in mitosis and may represent a mitotic cohesin.; sister chromatid cohesion 1 protein 4 (SYN4); FUNCTIONS IN: molecular_function unknown; INVOLVED IN: sister chromatid cohesion; LOCATED IN: nuclear chromosome; EXPRESSED IN: 22 plant structures; EXPRESSED DURING: 13 growth st…
'28.1'	'DNA.synthesis/chromatin structure'	HORVU5Hr1G095410,1	9.89026	4.4393e-302	'(loc_os08g33190.1 : 140.0) no description available & (q00423|hmgya_soybn : 100.0) HMG-Y-related protein A (SB16A protein) - Glycine max (Soybean) & (at1g14900 : 84.0) Encodes a protein belonging to the subgroup of HMGA (high mobility group A) proteins that interact with A/T-rich stretches of DNA.; high mobility group A (HMGA); FUNCTIONS IN: DNA binding; INVOLVED IN: regulation of transcription,…
'28.1'	'DNA.synthesis/chromatin structure'	HORVU7Hr1G041450,9	9.90238	4.81742e-298	'(loc_os06g14412.1 : 498.0) no description available & (at2g28290 : 487.0) Encodes a SWI2/SNF2-like protein in the SNF2 subclass. Homozygous plants with null mutations exhibit premature termination of the meristem and carpelloid structures from the inflorescence meristem. Co-activator of floral homeotic gene expression. Acts with LFY to regulate shoot apical meristem identity. Required for merist…
'28.1'	'DNA.synthesis/chromatin structure'	HORVU0Hr1G017330,12	10.6402	2.21648e-153	'(loc_os02g55410.1 : 370.0) no description available & (at2g07690 : 270.0) Member of the minichromosome maintenance complex, involved in DNA replication initiation. Abundant in proliferating and endocycling tissues. Localized in the nucleus during G1, S and G2 phases of the cell cycle, and are released into the cytoplasmic compartment during mitosis. Binds chromatin.; MINICHROMOSOME MAINTENANCE 5…
'28.1.3.2.4'	'DNA.synthesis/chromatin structure.histone.core.H4'	HORVU1Hr1G070700,3	13.8696	0	'(at5g59970 : 162.0) Histone superfamily protein; FUNCTIONS IN: DNA binding; INVOLVED IN: nucleosome assembly; LOCATED IN: vacuole; CONTAINS InterPro DOMAIN/s: Histone H4, conserved site (InterPro:IPR019809), Histone-fold (InterPro:IPR009072), Histone core (InterPro:IPR007125), Histone H4 (InterPro:IPR001951); BEST Arabidopsis thaliana protein match is: Histone superfamily protein (TAIR:AT5G59690…
'28.99'	'DNA.unspecified'	HORVU4Hr1G032190,11	10.1662	9.62768e-50	'(loc_os11g44910.1 : 898.0) no description available & (at3g05740 : 689.0) RECQ helicase l1 (RECQI1); FUNCTIONS IN: helicase activity, nucleic acid binding, ATP-dependent helicase activity, ATP binding; INVOLVED IN: DNA recombination; LOCATED IN: cellular_component unknown; EXPRESSED IN: 9 plant structures; EXPRESSED DURING: 6 growth stages; CONTAINS InterPro DOMAIN/s: DNA/RNA helicase, DEAD/DEAH…
'28.99'	'DNA.unspecified'	HORVU3Hr1G099730,1	10.6411	9.19016e-297	'(loc_os01g71050.1 : 404.0) no description available & (at1g08820 : 157.0) Encodes VAP33-like protein that interacts with cowpea mosaic virus protein 60K. Is a SNARE-like protein that may be involved in vesicular transport to or from the ER.; vamp/synaptobrevin-associated protein 27-2 (VAP27-2); FUNCTIONS IN: structural molecule activity; INVOLVED IN: intracellular transport; LOCATED IN: plasma m…
'29.1'	'protein.aa activation'	HORVU6Hr1G014980,1	9.82018	1.08252e-133	'(at5g03240 : 216.0) encodes ubiquitin that is attached to proteins destined for degradation. UBQ3 is most homologous with UBQ4, and is expressed in higher levels in vegetative tissue but lower levels in flowers than UBQ4. UBQ3 encodes different number of ubiquitins in different ecotypes. UBQ3 transcript level is modulated by UV-B and light/dark treatments.; polyubiquitin 3 (UBQ3); INVOLVED IN: p…
'29.1.21'	'protein.aa activation.histidine-tRNA ligase'	HORVU1Hr1G021700,5	9.92481	1.56414e-41	'(loc_os05g05840.1 : 1216.0) no description available & (p93422|syh_orysa : 1166.0) Histidyl-tRNA synthetase (EC 6.1.1.21) (Histidine--tRNA ligase) (HisRS) - Oryza sativa (Rice) & (at3g02760 : 669.0) Class II aaRS and biotin synthetases superfamily protein; FUNCTIONS IN: histidine-tRNA ligase activity, aminoacyl-tRNA ligase activity, nucleotide binding, ATP binding; INVOLVED IN: histidyl-tRNA ami…
'29.2.1.1.3.1.1'	'protein.synthesis.ribosomal protein.prokaryotic.unknown organellar.30S subunit.S1'	HORVU3Hr1G051150,1	9.9263	2.68922e-44	'(loc_os01g40640.3 : 382.0) no description available & (at1g71720 : 270.0) Nucleic acid-binding proteins superfamily; FUNCTIONS IN: RNA binding; LOCATED IN: chloroplast; EXPRESSED IN: 22 plant structures; EXPRESSED DURING: 13 growth stages; CONTAINS InterPro DOMAIN/s: Nucleic acid-binding, OB-fold-like (InterPro:IPR016027), Nucleic acid-binding, OB-fold (InterPro:IPR012340), Ribosomal protein S1,…
'29.2.1.2.1.10'	'protein.synthesis.ribosomal protein.eukaryotic.40S subunit.S10'	HORVU0Hr1G004700,2	11.5934	3.4233e-179	'(q9ayp4|rs10_orysa : 194.0) 40S ribosomal protein S10 - Oryza sativa (Rice) & (loc_os04g35090.1 : 194.0) no description available & (at5g52650 : 172.0) RNA binding Plectin/S10 domain-containing protein; FUNCTIONS IN: structural constituent of ribosome; INVOLVED IN: translation; LOCATED IN: cytosolic small ribosomal subunit, cytosolic ribosome, cell wall, membrane; EXPRESSED IN: 22 plant structur…
'29.2.1.2.1.11'	'protein.synthesis.ribosomal protein.eukaryotic.40S subunit.S11'	HORVU2Hr1G099230,6	12.3699	0	'(loc_os08g10608.1 : 307.0) no description available & (p25460|rs11_maize : 303.0) 40S ribosomal protein S11 - Zea mays (Maize) & (at5g23740 : 289.0) Encodes a putative ribosomal protein S11 (RPS11-beta).; ribosomal protein S11-beta (RPS11-BETA); FUNCTIONS IN: structural constituent of ribosome; INVOLVED IN: translation; LOCATED IN: cytosolic small ribosomal subunit, membrane; EXPRESSED IN: 22 pl…
'29.2.1.2.1.11'	'protein.synthesis.ribosomal protein.eukaryotic.40S subunit.S11'	HORVU2Hr1G099230,9	10.4157	1.73986e-71	'(loc_os08g10608.1 : 307.0) no description available & (p25460|rs11_maize : 303.0) 40S ribosomal protein S11 - Zea mays (Maize) & (at5g23740 : 289.0) Encodes a putative ribosomal protein S11 (RPS11-beta).; ribosomal protein S11-beta (RPS11-BETA); FUNCTIONS IN: structural constituent of ribosome; INVOLVED IN: translation; LOCATED IN: cytosolic small ribosomal subunit, membrane; EXPRESSED IN: 22 pl…
'29.2.1.2.1.4'	'protein.synthesis.ribosomal protein.eukaryotic.40S subunit.S4'	HORVU1Hr1G021720,3	10.1319	1.25307e-75	'(p49398|rs4_orysa : 458.0) 40S ribosomal protein S4 (SCAR protein SS620) - Oryza sativa (Rice) & (loc_os02g01560.1 : 458.0) no description available & (at5g58420 : 444.0) Ribosomal protein S4 (RPS4A) family protein; FUNCTIONS IN: structural constituent of ribosome; INVOLVED IN: translation; LOCATED IN: cytosolic small ribosomal subunit, cytosolic ribosome, nucleolus, membrane; EXPRESSED IN: 25 p…
'29.2.1.2.1.8'	'protein.synthesis.ribosomal protein.eukaryotic.40S subunit.S8'	HORVU2Hr1G067370,7	12.9803	0	'(p49199|rs8_orysa : 336.0) 40S ribosomal protein S8 - Oryza sativa (Rice) & (loc_os02g28810.2 : 336.0) no description available & (at5g20290 : 321.0) Ribosomal protein S8e family protein; FUNCTIONS IN: structural constituent of ribosome; INVOLVED IN: translation, ribosome biogenesis; LOCATED IN: in 8 components; EXPRESSED IN: 26 plant structures; EXPRESSED DURING: 14 growth stages; CONTAINS Inte…
'29.2.1.2.2.14'	'protein.synthesis.ribosomal protein.eukaryotic.60S subunit.L14'	HORVU6Hr1G058560,3	10.0835	1.8038e-147	'(loc_os04g43540.1 : 228.0) no description available & (at2g20450 : 200.0) Ribosomal protein L14; FUNCTIONS IN: structural constituent of ribosome; INVOLVED IN: translation, ribosome biogenesis; LOCATED IN: ribosome, cytosolic large ribosomal subunit, endoplasmic reticulum, vacuole; EXPRESSED IN: 23 plant structures; EXPRESSED DURING: 13 growth stages; CONTAINS InterPro DOMAIN/s: Ribosomal protei…
'29.2.1.2.2.30'	'protein.synthesis.ribosomal protein.eukaryotic.60S subunit.L30'	HORVU1Hr1G068640,2	13.9405	0	'(q5i7k9|rl30_wheat : 222.0) 60S ribosomal protein L30 - Triticum aestivum (Wheat) & (loc_os05g41110.1 : 216.0) no description available & (at3g18740 : 176.0) Ribosomal protein L7Ae/L30e/S12e/Gadd45 family protein; FUNCTIONS IN: structural constituent of ribosome; INVOLVED IN: translation; LOCATED IN: cytosolic ribosome, cytosolic large ribosomal subunit; EXPRESSED IN: 23 plant structures; EXPRES…
'29.2.1.2.2.7'	'protein.synthesis.ribosomal protein.eukaryotic.60S subunit.L7'	HORVU2Hr1G100970,5	9.73132	4.52216e-53	'(loc_os04g51630.2 : 382.0) no description available & (at2g01250 : 340.0) Ribosomal protein L30/L7 family protein; FUNCTIONS IN: structural constituent of ribosome; INVOLVED IN: translation; LOCATED IN: cytosolic large ribosomal subunit, chloroplast, plasma membrane, large ribosomal subunit, membrane; EXPRESSED IN: 25 plant structures; EXPRESSED DURING: 14 growth stages; CONTAINS InterPro DOMAIN…
'29.2.1.2.2.7'	'protein.synthesis.ribosomal protein.eukaryotic.60S subunit.L7'	HORVU5Hr1G108990,3	12.2674	2.9629e-221	'(loc_os04g51630.3 : 225.0) no description available & (at2g44120 : 202.0) Ribosomal protein L30/L7 family protein; FUNCTIONS IN: structural constituent of ribosome, transcription regulator activity; INVOLVED IN: translation; LOCATED IN: in 7 components; EXPRESSED IN: 22 plant structures; EXPRESSED DURING: 13 growth stages; CONTAINS InterPro DOMAIN/s: Ribosomal protein L30, N-terminal (InterPro:I…
'29.2.1.2.2.80'	'protein.synthesis.ribosomal protein.eukaryotic.60S subunit.P0'	HORVU5Hr1G047980,1	10.1874	3.47116e-114	'(loc_os11g01420.1 : 390.0) no description available & (at1g25260 : 269.0) Ribosomal protein L10 family protein; FUNCTIONS IN: structural constituent of ribosome; INVOLVED IN: translation, ribosome biogenesis; LOCATED IN: cytosolic ribosome, ribosome; EXPRESSED IN: 23 plant structures; EXPRESSED DURING: 13 growth stages; CONTAINS InterPro DOMAIN/s: Ribosomal protein L10 (InterPro:IPR001790); BEST…
'29.2.2.50'	'protein.synthesis.ribosome biogenesis.BRIX'	HORVU4Hr1G046720,5	9.98726	5.27986e-53	'(loc_os03g22350.1 : 223.0) no description available & (at5g61770 : 139.0) PETER PAN-like protein (PPAN); CONTAINS InterPro DOMAIN/s: Brix domain (InterPro:IPR007109); Has 35333 Blast hits to 34131 proteins in 2444 species: Archae - 798; Bacteria - 22429; Metazoa - 974; Fungi - 991; Plants - 531; Viruses - 0; Other Eukaryotes - 9610 (source: NCBI BLink). & (reliability: 278.0) & (original descrip…
'29.2.3'	'protein.synthesis.initiation'	HORVU4Hr1G050630,3	11.0485	0	'(o24473|if2b_wheat : 506.0) Eukaryotic translation initiation factor 2 subunit beta (eIF-2-beta) (P38) - Triticum aestivum (Wheat) & (loc_os03g21550.2 : 479.0) no description available & (at5g20920 : 346.0) protein synthesis initiation factor eIF2 beta; eukaryotic translation initiation factor 2 beta subunit (EIF2 BETA); FUNCTIONS IN: protein binding, translation initiation factor activity; INVO…
'29.2.3'	'protein.synthesis.initiation'	HORVU4Hr1G050630,4	10.865	6.28952e-185	'(o24473|if2b_wheat : 506.0) Eukaryotic translation initiation factor 2 subunit beta (eIF-2-beta) (P38) - Triticum aestivum (Wheat) & (loc_os03g21550.2 : 479.0) no description available & (at5g20920 : 346.0) protein synthesis initiation factor eIF2 beta; eukaryotic translation initiation factor 2 beta subunit (EIF2 BETA); FUNCTIONS IN: protein binding, translation initiation factor activity; INVO…
'29.2.3'	'protein.synthesis.initiation'	HORVU4Hr1G050630,7	11.9812	1.29854e-278	'(o24473|if2b_wheat : 506.0) Eukaryotic translation initiation factor 2 subunit beta (eIF-2-beta) (P38) - Triticum aestivum (Wheat) & (loc_os03g21550.2 : 479.0) no description available & (at5g20920 : 346.0) protein synthesis initiation factor eIF2 beta; eukaryotic translation initiation factor 2 beta subunit (EIF2 BETA); FUNCTIONS IN: protein binding, translation initiation factor activity; INVO…
'29.2.4'	'protein.synthesis.elongation'	HORVU0Hr1G017020,2	10.0279	5.11792e-91	'(q40034|ef1a2_horvu : 871.0) Elongation factor 1-alpha (EF-1-alpha) - Hordeum vulgare (Barley) & (loc_os03g08050.3 : 844.0) no description available & (at5g60390 : 843.0) GTP binding Elongation factor Tu family protein; FUNCTIONS IN: calmodulin binding, translation elongation factor activity; INVOLVED IN: translational elongation; LOCATED IN: mitochondrion, nucleus, cytoplasm; EXPRESSED IN: coty…
'29.3.1'	'protein.targeting.nucleus'	HORVU1Hr1G013580,2	9.75656	0	'(loc_os05g28510.4 : 1425.0) no description available & (at3g08943 : 1059.0) ARM repeat superfamily protein; FUNCTIONS IN: protein transporter activity, binding; INVOLVED IN: intracellular protein transport; CONTAINS InterPro DOMAIN/s: HEAT (InterPro:IPR000357), Importin-beta, N-terminal (InterPro:IPR001494), Armadillo-like helical (InterPro:IPR011989), Armadillo-type fold (InterPro:IPR016024); B…
'29.3.1'	'protein.targeting.nucleus'	HORVU2Hr1G126610,9	9.85953	1.08462e-102	'(loc_os04g59494.4 : 1466.0) no description available & (at2g16950 : 1198.0) Nuclear import receptor for AtGRP7.; transportin 1 (TRN1); CONTAINS InterPro DOMAIN/s: HEAT (InterPro:IPR000357), Importin-beta, N-terminal (InterPro:IPR001494), Armadillo-like helical (InterPro:IPR011989), Armadillo-type fold (InterPro:IPR016024); BEST Arabidopsis thaliana protein match is: ARM repeat superfamily protei…
'29.3.4.3'	'protein.targeting.secretory pathway.vacuole'	HORVU2Hr1G092090,1	13.4826	0	'(loc_os04g45470.1 : 186.0) no description available & (p49045|vpe_soybn : 150.0) Vacuolar-processing enzyme precursor (EC 3.4.22.-) (VPE) - Glycine max (Soybean) & (at4g32940 : 133.0) Encodes a vacuolar processing enzyme belonging to a novel group of cysteine proteinases that is expressed in vegetative organs and is upregulated in association with various types of cell death and under stressed c…
'29.4'	'protein.postranslational modification'	HORVU1Hr1G027770,9	10.0362	1.30896e-57	'(loc_os01g09200.1 : 810.0) no description available & (at4g33080 : 714.0) AGC (cAMP-dependent, cGMP-dependent and protein kinase C) kinase family protein; FUNCTIONS IN: kinase activity; INVOLVED IN: protein amino acid phosphorylation; LOCATED IN: cellular_component unknown; EXPRESSED IN: 22 plant structures; EXPRESSED DURING: 13 growth stages; CONTAINS InterPro DOMAIN/s: Protein kinase, ATP bind…
'29.4'	'protein.postranslational modification'	HORVU2Hr1G063420,9	13.1338	0	'(loc_os07g02350.1 : 631.0) no description available & (p28523|csk2a_maize : 623.0) Casein kinase II subunit alpha (EC 2.7.11.1) (CK II) (CK2-alpha) - Zea mays (Maize) & (at3g50000 : 606.0) casein kinase II catalytic subunit alpha; "casein kinase II, alpha chain 2" (CKA2); FUNCTIONS IN: protein binding, kinase activity; INVOLVED IN: protein amino acid phosphorylation; LOCATED IN: plasma membrane;…
'29.4'	'protein.postranslational modification'	HORVU2Hr1G063420,6	10.2095	9.27878e-104	'(loc_os07g02350.1 : 631.0) no description available & (p28523|csk2a_maize : 623.0) Casein kinase II subunit alpha (EC 2.7.11.1) (CK II) (CK2-alpha) - Zea mays (Maize) & (at3g50000 : 606.0) casein kinase II catalytic subunit alpha; "casein kinase II, alpha chain 2" (CKA2); FUNCTIONS IN: protein binding, kinase activity; INVOLVED IN: protein amino acid phosphorylation; LOCATED IN: plasma membrane;…
'29.4'	'protein.postranslational modification'	HORVU5Hr1G051850,5	12.0451	0	'(loc_os09g07510.2 : 907.0) no description available & (at3g25800 : 884.0) one of three genes encoding the protein phosphatase 2A regulatory subunit; protein phosphatase 2A subunit A2 (PP2AA2); FUNCTIONS IN: protein phosphatase type 2A regulator activity; INVOLVED IN: response to cadmium ion, regulation of phosphorylation; LOCATED IN: plasma membrane; EXPRESSED IN: 25 plant structures; EXPRESSED …
'29.4'	'protein.postranslational modification'	HORVU5Hr1G078370,3	10.151	4.02388e-118	'(loc_os09g33930.3 : 536.0) no description available & (at3g59380 : 391.0) Encodes the alpha-subunit shared between protein farnesyltransferase and protein geranylgeranyltransferase-I. Involved in protein prenylation: covalent attachment of the C-15 isoprene farnesyl or the C-20 isoprene geranylgeranyl groups to the C-terminal end of some proteins. Involved in shoot and flower meristem homeostasi…
'29.4'	'protein.postranslational modification'	HORVU5Hr1G097060,7	11.6257	6.34486e-67	'(loc_os03g55320.3 : 325.0) no description available & (at4g33920 : 223.0) Protein phosphatase 2C family protein; FUNCTIONS IN: protein serine/threonine phosphatase activity, catalytic activity; INVOLVED IN: protein amino acid dephosphorylation; LOCATED IN: mitochondrion, protein serine/threonine phosphatase complex; EXPRESSED IN: 23 plant structures; EXPRESSED DURING: 13 growth stages; CONTAINS …
'29.4'	'protein.postranslational modification'	HORVU7Hr1G084630,3	9.8009	1.61865e-92	'(loc_os06g39760.1 : 629.0) no description available & (at1g52730 : 574.0) Transducin/WD40 repeat-like superfamily protein; CONTAINS InterPro DOMAIN/s: WD40 repeat 2 (InterPro:IPR019782), WD40 repeat-like-containing domain (InterPro:IPR011046), WD40 repeat, conserved site (InterPro:IPR019775), WD40-repeat-containing domain (InterPro:IPR017986), WD40/YVTN repeat-like-containing domain (InterPro:IP…
'29.4'	'protein.postranslational modification'	HORVU3Hr1G003410,3	9.71768	1.45839e-146	'(loc_os04g34390.1 : 705.0) no description available & (at2g19130 : 519.0) S-locus lectin protein kinase family protein; FUNCTIONS IN: protein serine/threonine kinase activity, sugar binding, protein kinase activity, ATP binding; INVOLVED IN: protein amino acid phosphorylation, recognition of pollen; LOCATED IN: endomembrane system; EXPRESSED IN: 19 plant structures; EXPRESSED DURING: 13 growth s…
'29.5'	'protein.degradation'	HORVU2Hr1G011910,2	10.032	3.8403e-144	'(loc_os07g24050.1 : 179.0) no description available & (at2g20170 : 90.9) Protein of Unknown Function (DUF239); FUNCTIONS IN: molecular_function unknown; INVOLVED IN: biological_process unknown; LOCATED IN: endomembrane system; CONTAINS InterPro DOMAIN/s: Protein of unknown function DUF239, plant (InterPro:IPR004314); BEST Arabidopsis thaliana protein match is: Protein of Unknown Function (DUF239…
'29.5.11'	'protein.degradation.ubiquitin'	HORVU1Hr1G029800,14	9.84392	1.69637e-32	'(loc_os05g14300.1 : 381.0) no description available & (at3g15355 : 233.0) ubiquitin-conjugating enzyme 25 (UBC25); FUNCTIONS IN: small conjugating protein ligase activity; INVOLVED IN: regulation of protein metabolic process, post-translational protein modification; LOCATED IN: cellular_component unknown; EXPRESSED IN: 21 plant structures; EXPRESSED DURING: 13 growth stages; CONTAINS InterPro DO…
'29.5.11'	'protein.degradation.ubiquitin'	HORVU2Hr1G082590,4	10.2009	0	'(loc_os04g40090.1 : 454.0) no description available & (at4g24690 : 209.0) ubiquitin-associated (UBA)/TS-N domain-containing protein / octicosapeptide/Phox/Bemp1 (PB1) domain-containing protein; FUNCTIONS IN: zinc ion binding; INVOLVED IN: biological_process unknown; LOCATED IN: cytoplasm; EXPRESSED IN: 24 plant structures; EXPRESSED DURING: 15 growth stages; CONTAINS InterPro DOMAIN/s: Octicosap…
'29.5.11'	'protein.degradation.ubiquitin'	HORVU5Hr1G016350,10	10.0728	1.42253e-221	'(loc_os12g40490.1 : 419.0) no description available & (at4g36860 : 340.0) LIM domain-containing protein; FUNCTIONS IN: zinc ion binding; LOCATED IN: plasma membrane; EXPRESSED IN: 24 plant structures; EXPRESSED DURING: 13 growth stages; CONTAINS InterPro DOMAIN/s: Zinc finger, LIM-type (InterPro:IPR001781), Ubiquitin interacting motif (InterPro:IPR003903), Protein of unknown function DUF3633 (In…
'29.5.11'	'protein.degradation.ubiquitin'	HORVU6Hr1G016460,6	9.74483	2.34634e-45	'(loc_os02g30180.2 : 323.0) no description available & (at1g04850 : 243.0) ubiquitin-associated (UBA)/TS-N domain-containing protein; FUNCTIONS IN: zinc ion binding; INVOLVED IN: biological_process unknown; LOCATED IN: intracellular; EXPRESSED IN: 24 plant structures; EXPRESSED DURING: 13 growth stages; CONTAINS InterPro DOMAIN/s: Zinc finger, C2H2-like (InterPro:IPR015880), Ubiquitin-associated/…
'29.5.11'	'protein.degradation.ubiquitin'	HORVU6Hr1G029050,4	9.78136	1.70191e-102	'(loc_os09g25320.1 : 234.0) no description available & (at1g31340 : 233.0) Encodes a ubiquitin-related protein that is conjugated to target proteins by neddylation. It has been shown to be conjugated to the cullin AtCUL1. The RUB-conjugation pathway has been implicated in in auxin response.; related to ubiquitin 1 (RUB1); INVOLVED IN: protein modification process, response to auxin stimulus, prot…
'29.5.11'	'protein.degradation.ubiquitin'	HORVU6Hr1G029150,7	9.83605	6.69202e-106	'(loc_os02g08370.1 : 330.0) no description available & (at1g65650 : 245.0) UCH2; CONTAINS InterPro DOMAIN/s: Peptidase C12, ubiquitin carboxyl-terminal hydrolase 1 (InterPro:IPR001578), Ubiquitinyl hydrolase, UCH37 type (InterPro:IPR017390); BEST Arabidopsis thaliana protein match is: Peptidase C12, ubiquitin carboxyl-terminal hydrolase 1 (TAIR:AT5G16310.1); Has 1283 Blast hits to 1275 proteins i…
'29.5.11.4.3.2'	'protein.degradation.ubiquitin.E3.SCF.FBOX'	HORVU2Hr1G104500,10	10.1189	3.82492e-139	'(loc_os02g56840.1 : 181.0) no description available & (at2g02360 : 142.0) phloem protein 2-B10 (PP2-B10); CONTAINS InterPro DOMAIN/s: F-box domain, cyclin-like (InterPro:IPR001810), F-box domain, Skp2-like (InterPro:IPR022364); BEST Arabidopsis thaliana protein match is: F-box family protein (TAIR:AT2G02240.1); Has 572 Blast hits to 558 proteins in 38 species: Archae - 0; Bacteria - 0; Metazoa -…
'29.5.11.4.3.2'	'protein.degradation.ubiquitin.E3.SCF.FBOX'	HORVU5Hr1G093590,9	9.71596	8.98728e-148	'(loc_os03g43390.1 : 604.0) no description available & (at3g54650 : 357.0) FBL17; FUNCTIONS IN: ubiquitin-protein ligase activity; INVOLVED IN: generative cell mitosis, seed development, embryo development, ubiquitin-dependent protein catabolic process, pollen development; LOCATED IN: chloroplast; EXPRESSED IN: 21 plant structures; EXPRESSED DURING: 12 growth stages; CONTAINS InterPro DOMAIN/s: F…
'29.5.11.4.3.3'	'protein.degradation.ubiquitin.E3.SCF.cullin'	HORVU1Hr1G020400,3	10.2119	3.66064e-111	'(loc_os01g27150.1 : 858.0) no description available & (at4g02570 : 724.0) Encodes a cullin that is a component of SCF ubiquitin ligase complexes involved in mediating responses to auxin and jasmonic acid. Homozygous auxin-resistant mutants arrest growth soon after germination, lacking a root and hypocotyl. Heterozygotes display a variety of phenotypes consistent with impaired auxin response.; cu…
'29.5.3'	'protein.degradation.cysteine protease'	HORVU2Hr1G073300,6	9.89026	1.56421e-107	'(loc_os04g33780.1 : 615.0) no description available & (at2g27350 : 403.0) OTU-like cysteine protease family protein; FUNCTIONS IN: cysteine-type peptidase activity; INVOLVED IN: biological_process unknown; LOCATED IN: chloroplast; EXPRESSED IN: 24 plant structures; EXPRESSED DURING: 15 growth stages; CONTAINS InterPro DOMAIN/s: Ubiquitin-associated/translation elongation factor EF1B, N-terminal,…
'29.5.3'	'protein.degradation.cysteine protease'	HORVU3Hr1G039020,1	9.97871	1.27708e-39	'(loc_os08g44270.1 : 95.9) no description available & (o65039|cysep_ricco : 93.6) Vignain precursor (EC 3.4.22.-) (Cysteine endopeptidase) - Ricinus communis (Castor bean) & (at5g50260 : 89.0) Cysteine proteinases superfamily protein; FUNCTIONS IN: cysteine-type endopeptidase activity, cysteine-type peptidase activity; INVOLVED IN: proteolysis; LOCATED IN: endomembrane system; EXPRESSED IN: 8 pla…
'29.5.3'	'protein.degradation.cysteine protease'	HORVU6Hr1G091360,3	9.9629	1.42862e-140	'(loc_os02g57410.5 : 510.0) no description available & (at5g04250 : 273.0) Cysteine proteinases superfamily protein; FUNCTIONS IN: cysteine-type peptidase activity; INVOLVED IN: biological_process unknown; LOCATED IN: cellular_component unknown; EXPRESSED IN: 24 plant structures; EXPRESSED DURING: 15 growth stages; CONTAINS InterPro DOMAIN/s: Ovarian tumour, otubain (InterPro:IPR003323); BEST Ara…
'29.5.4'	'protein.degradation.aspartate protease'	HORVU1Hr1G017570,9	9.74987	2.79752e-46	'(p42211|asprx_orysa : 883.0) Aspartic proteinase precursor (EC 3.4.23.-) - Oryza sativa (Rice) & (loc_os05g04630.6 : 883.0) no description available & (at1g11910 : 626.0) Encodes an aspartic proteinase that forms a heterodimer and is stable over a broad pH range (ph 3-8).; aspartic proteinase A1 (APA1); FUNCTIONS IN: endopeptidase activity; INVOLVED IN: proteolysis, response to salt stress; LOCA…
'29.5.4'	'protein.degradation.aspartate protease'	HORVU6Hr1G072910,4	12.8063	0	'(loc_os02g49800.1 : 356.0) no description available & (at1g49050 : 213.0) Eukaryotic aspartyl protease family protein; FUNCTIONS IN: aspartic-type endopeptidase activity; INVOLVED IN: proteolysis; LOCATED IN: endomembrane system; EXPRESSED IN: 24 plant structures; EXPRESSED DURING: 13 growth stages; CONTAINS InterPro DOMAIN/s: Peptidase aspartic (InterPro:IPR021109), Peptidase aspartic, catalyti…
'29.5.5'	'protein.degradation.serine protease'	HORVU6Hr1G063910,2	9.74651	8.15462e-79	'(loc_os02g44520.1 : 1117.0) no description available & (at4g20850 : 804.0) Tripeptidyl Peptidase II. Ser protease that assembles into a large oligomeric complex containing two proteins of 153 and 142 kD that are derived from a single TPP2 gene, with the smaller version missing part of the C-terminal end. Not essential, based on the lack of phenotype of a T-DNA disruption mutant.; tripeptidyl pep…
'29.5.9'	'protein.degradation.AAA type'	HORVU1Hr1G076180,23	10.1085	2.36302e-240	'(loc_os05g44310.1 : 1042.0) no description available & (at4g04910 : 900.0) N-ethylmaleimide sensitive factor; N-ethylmaleimide sensitive factor (NSF); FUNCTIONS IN: protein binding; LOCATED IN: vacuole; EXPRESSED IN: 26 plant structures; EXPRESSED DURING: 15 growth stages; CONTAINS InterPro DOMAIN/s: ATPase, AAA+ type, core (InterPro:IPR003593), ATPase, AAA-type, core (InterPro:IPR003959), ATPas…
'29.5.9'	'protein.degradation.AAA type'	HORVU2Hr1G019730,17	9.71425	1.39016e-113	'(loc_os07g47530.1 : 1484.0) no description available & (at4g02480 : 831.0) AAA-type ATPase family protein; FUNCTIONS IN: nucleoside-triphosphatase activity, ATPase activity, nucleotide binding, ATP binding; LOCATED IN: chloroplast; EXPRESSED IN: 24 plant structures; EXPRESSED DURING: 14 growth stages; CONTAINS InterPro DOMAIN/s: ATPase, AAA+ type, core (InterPro:IPR003593), ATPase, AAA-type, cor…
'29.6'	'protein.folding'	HORVU7Hr1G044070,3	11.6036	2.26208e-269	'(loc_os04g46620.1 : 886.0) no description available & (at3g20050 : 827.0) Encodes a putative cytoplasmic chaperonin that is similar to mouse Tcp-1 (t complex polypeptide 1).; T-complex protein 1 alpha subunit (TCP-1); FUNCTIONS IN: unfolded protein binding, ATP binding; INVOLVED IN: protein folding, cellular protein metabolic process; LOCATED IN: cellular_component unknown; EXPRESSED IN: 24 plan…
'30.11'	'signalling.light'	HORVU3Hr1G012030,1	9.76321	2.61702e-62	'(loc_os01g31629.3 : 172.0) no description available & (at1g55080 : 109.0) MED9; BEST Arabidopsis thaliana protein match is: unknown protein (TAIR:AT1G29580.1); Has 67203 Blast hits to 25757 proteins in 1293 species: Archae - 12; Bacteria - 4374; Metazoa - 24340; Fungi - 7940; Plants - 5927; Viruses - 273; Other Eukaryotes - 24337 (source: NCBI BLink). & (reliability: 218.0) & (original descripti…
'30.2.5'	'signalling.receptor kinases.leucine rich repeat V'	HORVU2Hr1G039960,9	9.94837	1.69024e-65	'(loc_os07g37810.2 : 1024.0) no description available & (at2g20850 : 466.0) STRUBBELIG-receptor family 1 (SRF1); FUNCTIONS IN: kinase activity; INVOLVED IN: protein amino acid phosphorylation; LOCATED IN: plasma membrane; EXPRESSED IN: 22 plant structures; EXPRESSED DURING: 13 growth stages; CONTAINS InterPro DOMAIN/s: Serine/threonine-protein kinase domain (InterPro:IPR002290), Leucine-rich repe…
'30.3'	'signalling.calcium'	HORVU2Hr1G077560,12	9.7364	2.15032e-79	'(loc_os04g36660.1 : 955.0) no description available & (at5g57580 : 603.0) Calmodulin-binding protein; CONTAINS InterPro DOMAIN/s: Calmodulin binding protein-like (InterPro:IPR012416); BEST Arabidopsis thaliana protein match is: Calmodulin-binding protein (TAIR:AT4G25800.2); Has 341 Blast hits to 322 proteins in 21 species: Archae - 0; Bacteria - 2; Metazoa - 0; Fungi - 0; Plants - 339; Viruses -…
'30.3'	'signalling.calcium'	HORVU2Hr1G114590,3	10.1383	0	'(loc_os04g55220.1 : 863.0) no description available & (at1g05500 : 709.0) Encodes a endomembrane-localized synaptotagmin. Synaptotagmin family proteins are calcium sensors that regulate exocytosis in mammalian cells.; NTMC2T2.1; FUNCTIONS IN: molecular_function unknown; INVOLVED IN: biological_process unknown; LOCATED IN: endomembrane system, plasma membrane; EXPRESSED IN: 25 plant structures; E…
'30.3'	'signalling.calcium'	HORVU5Hr1G075050,12	9.85643	1.45486e-28	'(loc_os08g40530.2 : 562.0) no description available & (at3g21180 : 497.0) one of the type IIB calcium pump isoforms. encodes an autoinhibited Ca(2+)-ATPase that contains an N-terminal calmodulin binding autoinhibitory domain.; autoinhibited Ca(2+)-ATPase 9 (ACA9); FUNCTIONS IN: calcium-transporting ATPase activity, calmodulin binding; INVOLVED IN: single fertilization, pollen development; LOCATE…
'30.5'	'signalling.G-proteins'	HORVU3Hr1G010780,5	11.5226	4.81672e-97	'(loc_os01g08450.1 : 378.0) no description available & (q05737|yptm2_maize : 377.0) GTP-binding protein YPTM2 - Zea mays (Maize) & (at1g02130 : 368.0) Belongs to the Rab1 GTPase subfamily. This small GTP-binding protein is required in ER to Golgi transportation.; RAS 5 (RA-5); FUNCTIONS IN: GTP binding; INVOLVED IN: response to cadmium ion, ER to Golgi vesicle-mediated transport; LOCATED IN: plas…
'30.5'	'signalling.G-proteins'	HORVU3Hr1G026100,11	9.86419	4.36918e-102	'(loc_os01g10790.1 : 422.0) no description available & (at5g45760 : 264.0) Transducin/WD40 repeat-like superfamily protein; CONTAINS InterPro DOMAIN/s: WD40 repeat 2 (InterPro:IPR019782), WD40 repeat-like-containing domain (InterPro:IPR011046), WD40-repeat-containing domain (InterPro:IPR017986), WD40/YVTN repeat-like-containing domain (InterPro:IPR015943), WD40 repeat (InterPro:IPR001680), WD40 r…
'30.9'	'signalling.lipids'	HORVU1Hr1G041740,9	10.1396	1.56794e-46	'(at2g28320 : 779.0) Pleckstrin homology (PH) and lipid-binding START domains-containing protein; FUNCTIONS IN: phosphoinositide binding; INVOLVED IN: signal transduction; LOCATED IN: plasma membrane; EXPRESSED IN: 24 plant structures; EXPRESSED DURING: 15 growth stages; CONTAINS InterPro DOMAIN/s: Protein of unknown function DUF1336 (InterPro:IPR009769), Pleckstrin homology-type (InterPro:IPR011…
'31.1'	'cell.organisation'	HORVU2Hr1G108010,6	9.783	1.49062e-55	'(loc_os04g53760.2 : 926.0) no description available & (at4g05190 : 520.0) ATK5 encodes a kinesin protein involved in microtubule spindle morphogenesis. It acts as a minus-end directed motor as well as a plus-end tracking protein (+TIP). Localizes to mitotic spindle midzones and regions rich in growing plus-ends within phragmoplasts.; kinesin 5 (ATK5); FUNCTIONS IN: microtubule motor activity; IN…
'31.1.1.1.2'	'cell.organisation.cytoskeleton.actin.actin depolymerizing factors'	HORVU5Hr1G100770,2	9.86264	1.18207e-31	'(loc_os03g56790.1 : 277.0) no description available & (q8sag3|adf_vitvi : 218.0) Actin-depolymerizing factor (ADF) - Vitis vinifera (Grape) & (at2g31200 : 212.0) Encodes actin depolymerizing factor 6 (ADF6).; actin depolymerizing factor 6 (ADF6); FUNCTIONS IN: actin binding; INVOLVED IN: biological_process unknown; LOCATED IN: intracellular; EXPRESSED IN: 24 plant structures; EXPRESSED DURING: 1…
'31.1.1.1.2'	'cell.organisation.cytoskeleton.actin.actin depolymerizing factors'	HORVU5Hr1G100770,3	11.7797	0	'(loc_os03g56790.1 : 277.0) no description available & (q8sag3|adf_vitvi : 218.0) Actin-depolymerizing factor (ADF) - Vitis vinifera (Grape) & (at2g31200 : 212.0) Encodes actin depolymerizing factor 6 (ADF6).; actin depolymerizing factor 6 (ADF6); FUNCTIONS IN: actin binding; INVOLVED IN: biological_process unknown; LOCATED IN: intracellular; EXPRESSED IN: 24 plant structures; EXPRESSED DURING: 1…
'31.1.1.1.3'	'cell.organisation.cytoskeleton.actin.actin binding'	HORVU3Hr1G113850,1	9.96145	3.9754e-166	'(loc_os06g44890.1 : 476.0) no description available & (at4g30160 : 349.0) Arabidopsis thaliana VILLIN4; villin 4 (VLN4); FUNCTIONS IN: actin binding; INVOLVED IN: cytoskeleton organization; LOCATED IN: cellular_component unknown; EXPRESSED IN: 23 plant structures; EXPRESSED DURING: 13 growth stages; CONTAINS InterPro DOMAIN/s: Gelsolin (InterPro:IPR007122), Villin headpiece (InterPro:IPR003128),…
'31.1.1.2.6'	'cell.organisation.cytoskeleton.mikrotubuli.MAP65'	HORVU7Hr1G054130,3	11.5925	0	'(loc_os08g41890.1 : 654.0) no description available & (at1g27920 : 405.0) microtubule-associated protein 65-8 (MAP65-8); CONTAINS InterPro DOMAIN/s: Microtubule-associated protein, MAP65/ASE1-type (InterPro:IPR007145); BEST Arabidopsis thaliana protein match is: microtubule-associated protein 65-2 (TAIR:AT4G26760.1); Has 2013 Blast hits to 1836 proteins in 335 species: Archae - 36; Bacteria - 20…
'31.2'	'cell.division'	HORVU5Hr1G089510,8	9.8009	4.6862e-63	'(at5g60870 : 392.0) Regulator of chromosome condensation (RCC1) family protein; FUNCTIONS IN: Ran GTPase binding; INVOLVED IN: biological_process unknown; EXPRESSED IN: 14 plant structures; EXPRESSED DURING: 7 growth stages; CONTAINS InterPro DOMAIN/s: Regulator of chromosome condensation/beta-lactamase-inhibitor protein II (InterPro:IPR009091), Regulator of chromosome condensation, RCC1 (InterP…
'31.3.1'	'cell.cycle.peptidylprolyl isomerase'	HORVU2Hr1G056230,10	9.74651	3.57182e-65	'(loc_os07g08190.1 : 275.0) no description available & (at3g63400 : 221.0) Cyclophilin-like peptidyl-prolyl cis-trans isomerase family protein; FUNCTIONS IN: peptidyl-prolyl cis-trans isomerase activity; INVOLVED IN: protein folding, RNA splicing; LOCATED IN: cellular_component unknown; EXPRESSED IN: 23 plant structures; EXPRESSED DURING: 13 growth stages; CONTAINS InterPro DOMAIN/s: Cyclophilin-…
'31.3.1'	'cell.cycle.peptidylprolyl isomerase'	HORVU6Hr1G077290,10	10.0348	8.57724e-174	'(loc_os02g52360.2 : 610.0) no description available & (at2g15790 : 503.0) SQN encodes the Arabidopsis homolog of cyclophilin 40 (CyP40). It is specifically required for the vegetative but not the reproductive maturation of the shoot.; SQUINT (SQN); CONTAINS InterPro DOMAIN/s: Cyclophilin-like (InterPro:IPR015891), Peptidyl-prolyl cis-trans isomerase, cyclophilin-type (InterPro:IPR002130), Tetrat…
'31.4'	'cell.vesicle transport'	HORVU1Hr1G042050,8	10.1007	3.96072e-289	'(loc_os07g10150.1 : 1516.0) no description available & (at4g34450 : 1301.0) coatomer gamma-2 subunit, putative / gamma-2 coat protein, putative / gamma-2 COP, putative; FUNCTIONS IN: clathrin binding, structural molecule activity, binding; INVOLVED IN: intracellular protein transport, vesicle-mediated transport; LOCATED IN: chloroplast, membrane; EXPRESSED IN: 26 plant structures; EXPRESSED DURI…
'31.4'	'cell.vesicle transport'	HORVU6Hr1G095330,12	10.0389	2.69576e-162	'(loc_os07g07000.1 : 433.0) no description available & (at5g08080 : 330.0) member of SYP13 Gene Family; syntaxin of plants 132 (SYP132); CONTAINS InterPro DOMAIN/s: Target SNARE coiled-coil domain (InterPro:IPR000727), t-SNARE (InterPro:IPR010989), Syntaxin/epimorphin, conserved site (InterPro:IPR006012), Syntaxin, N-terminal (InterPro:IPR006011); BEST Arabidopsis thaliana protein match is: synta…
'31.4'	'cell.vesicle transport'	HORVU7Hr1G065240,10	9.79604	7.52984e-157	'(loc_os06g16430.1 : 373.0) no description available & (at5g38840 : 259.0) SMAD/FHA domain-containing protein ; FUNCTIONS IN: molecular_function unknown; INVOLVED IN: biological_process unknown; LOCATED IN: membrane; EXPRESSED IN: 23 plant structures; EXPRESSED DURING: 13 growth stages; CONTAINS InterPro DOMAIN/s: SMAD/FHA domain (InterPro:IPR008984), Forkhead-associated (FHA) domain (InterPro:IP…
'33.3'	'development.squamosa promoter binding like (SPL)'	HORVU5Hr1G117190,3	10.1523	3.94756e-145	'(loc_os03g61760.1 : 744.0) no description available & (at2g47070 : 350.0) member of SPL gene family, encodes DNA binding proteins and putative transcription factors. All have the SBP-box, which encodes the SBP-domain, required for and sufficient for interaction with DNA.; squamosa promoter binding protein-like 1 (SPL1); FUNCTIONS IN: DNA binding, sequence-specific DNA binding transcription facto…
'33.99'	'development.unspecified'	HORVU1Hr1G046740,2	9.73471	2.97506e-171	'(loc_os10g36420.1 : 176.0) no description available & (at2g45190 : 142.0) Encodes a member of the YABBY family of transcriptional regulators that is involved in abaxial cell type specification in leaves and fruits. YAB1 acts in a non-cell autonomous fashion within the meristem to affect phyllotactic patterning. The non-autonomous effect on the central region of the meristem is mediated through t…
'34.1'	'transport.p- and v-ATPases'	HORVU7Hr1G087590,1	9.79442	2.40684e-190	'(loc_os06g36990.1 : 829.0) no description available & (at1g54280 : 680.0) ATPase E1-E2 type family protein / haloacid dehalogenase-like hydrolase family protein; FUNCTIONS IN: zinc ion binding, ATPase activity, coupled to transmembrane movement of ions, phosphorylative mechanism; INVOLVED IN: metabolic process, phospholipid transport, ATP biosynthetic process; LOCATED IN: integral to membrane, m…
'34.21'	'transport.calcium'	HORVU5Hr1G048120,19	11.6041	0	'(loc_os12g07650.1 : 446.0) no description available & (at2g38270 : 306.0) Encodes protein homologous to CXIP1. CXIP1 is a PICOT domain containing protein interacts with CAX1, a high capacity calcium transporter. However, CXP2 does not interact with CAX1 and only moderately activates another calcium transporter CAX4.; CAX-interacting protein 2 (CXIP2); FUNCTIONS IN: electron carrier activity, pro…
'34.22'	'transport.cyclic nucleotide or calcium regulated channels'	HORVU7Hr1G079410,1	9.78463	3.66064e-111	'(loc_os06g33570.1 : 410.0) no description available & (at5g53130 : 326.0) member of Cyclic nucleotide gated channel family; cyclic nucleotide gated channel 1 (CNGC1); FUNCTIONS IN: inward rectifier potassium channel activity, cyclic nucleotide binding, intracellular cyclic nucleotide activated cation channel activity, calmodulin binding, cation channel activity; INVOLVED IN: potassium ion transp…
'34.23.1'	'transport.hormones.auxin'	HORVU3Hr1G019440,9	9.77149	1.65722e-45	'(loc_os01g09670.1 : 360.0) no description available & (at5g11790 : 299.0) N-MYC downregulated-like 2 (NDL2); CONTAINS InterPro DOMAIN/s: Pollen specific protein SF21 (InterPro:IPR015511), Ndr (InterPro:IPR004142); BEST Arabidopsis thaliana protein match is: N-MYC downregulated-like 1 (TAIR:AT5G56750.1); Has 30201 Blast hits to 17322 proteins in 780 species: Archae - 12; Bacteria - 1396; Metazoa …
'34.7'	'transport.phosphate'	HORVU3Hr1G085350,10	9.84235	4.70502e-117	'(loc_os01g63290.1 : 460.0) no description available & (at3g46980 : 355.0) Encodes an inorganic phosphate transporter (PHT4;3).; phosphate transporter 4;3 (PHT4;3); FUNCTIONS IN: organic anion transmembrane transporter activity, carbohydrate transmembrane transporter activity, inorganic phosphate transmembrane transporter activity, sugar:hydrogen symporter activity; INVOLVED IN: transmembrane tra…
'34.8'	'transport.metabolite transporters at the envelope membrane'	HORVU2Hr1G045900,8	10.1163	2.20086e-53	'(loc_os07g33910.2 : 310.0) no description available & (at1g61800 : 264.0) glucose6-Phosphate/phosphate transporter 2; glucose-6-phosphate/phosphate translocator 2 (GPT2); FUNCTIONS IN: antiporter activity, glucose-6-phosphate transmembrane transporter activity; INVOLVED IN: in 7 processes; LOCATED IN: plasma membrane; EXPRESSED IN: 16 plant structures; EXPRESSED DURING: 10 growth stages; CONTAIN…
'34.9'	'transport.metabolite transporters at the mitochondrial membrane'	HORVU2Hr1G090800,6	10.2033	0	'(loc_os04g44540.2 : 545.0) no description available & (at4g15010 : 335.0) Mitochondrial substrate carrier family protein; FUNCTIONS IN: binding; INVOLVED IN: transport, mitochondrial transport, transmembrane transport; LOCATED IN: endomembrane system, mitochondrial inner membrane, membrane; EXPRESSED IN: 19 plant structures; EXPRESSED DURING: 8 growth stages; CONTAINS InterPro DOMAIN/s: Mitochon…
'34.9'	'transport.metabolite transporters at the mitochondrial membrane'	HORVU3Hr1G025820,3	11.4051	0	'(loc_os05g11780.1 : 284.0) no description available & (at5g19760 : 259.0) Mitochondrial substrate carrier family protein; FUNCTIONS IN: oxidative phosphorylation uncoupler activity, binding; INVOLVED IN: transport, mitochondrial transport, transmembrane transport; LOCATED IN: in 6 components; EXPRESSED IN: 27 plant structures; EXPRESSED DURING: 16 growth stages; CONTAINS InterPro DOMAIN/s: Mitoc…
'34.99'	'transport.misc'	HORVU5Hr1G082890,1	9.92481	1.33808e-48	'(loc_os03g37490.1 : 493.0) no description available & (at3g21690 : 412.0) MATE efflux family protein; FUNCTIONS IN: antiporter activity, drug transmembrane transporter activity, transporter activity; INVOLVED IN: drug transmembrane transport, transmembrane transport; LOCATED IN: plasma membrane, membrane; EXPRESSED IN: 23 plant structures; EXPRESSED DURING: 13 growth stages; CONTAINS InterPro DO…
'34.99'	'transport.misc'	HORVU2Hr1G031690,15	9.7211	4.8029e-34	'(loc_os07g42180.1 : 1148.0) no description available & (at1g72560 : 794.0) Encodes a karyopherin, specifically the Arabidopsis ortholog of LOS1/XPOT, a protein that mediates nuclear export of tRNAs in yeast and mammals. PSD is capable of rescuing the tRNA export defect of los1 in S. cerevisiae. psd mutants display disrupted initiation of the shoot apical meristem and delay leaf initiation after …
'35.1'	'not assigned.no ontology'	HORVU1Hr1G017220,12	10.014	0	'(loc_os07g12520.1 : 830.0) no description available & (at4g13970 : 656.0) zinc ion binding; FUNCTIONS IN: zinc ion binding; INVOLVED IN: biological_process unknown; LOCATED IN: cellular_component unknown; CONTAINS InterPro DOMAIN/s: Zinc finger, SWIM-type (InterPro:IPR007527); BEST Arabidopsis thaliana protein match is: SWIM zinc finger family protein (TAIR:AT1G60560.1); Has 80 Blast hits to 80 …
'35.1'	'not assigned.no ontology'	HORVU1Hr1G051150,7	10.1636	0	'(loc_os10g42780.1 : 582.0) no description available & (at1g32080 : 580.0) membrane protein, putative; LOCATED IN: chloroplast, chloroplast inner membrane, membrane, chloroplast envelope; EXPRESSED IN: 21 plant structures; EXPRESSED DURING: 13 growth stages; CONTAINS InterPro DOMAIN/s: LrgB-like protein (InterPro:IPR007300); Has 3603 Blast hits to 3592 proteins in 1271 species: Archae - 22; Bacte…
'35.1'	'not assigned.no ontology'	HORVU1Hr1G069060,10	9.89633	1.34691e-54	'(loc_os03g52594.3 : 611.0) no description available & (at1g07705 : 468.0) NOT2 / NOT3 / NOT5 family; FUNCTIONS IN: transcription regulator activity; INVOLVED IN: regulation of transcription; LOCATED IN: nucleus, chloroplast; EXPRESSED IN: 23 plant structures; EXPRESSED DURING: 13 growth stages; CONTAINS InterPro DOMAIN/s: NOT2/NOT3/NOT5 (InterPro:IPR007282); BEST Arabidopsis thaliana protein mat…
'35.1'	'not assigned.no ontology'	HORVU2Hr1G036030,4	9.72451	5.34494e-86	'(loc_os07g39630.1 : 603.0) no description available & (at5g47540 : 520.0) Mo25 family protein; FUNCTIONS IN: binding; INVOLVED IN: biological_process unknown; EXPRESSED IN: 24 plant structures; EXPRESSED DURING: 15 growth stages; CONTAINS InterPro DOMAIN/s: Mo25-like (InterPro:IPR013878), Armadillo-type fold (InterPro:IPR016024); BEST Arabidopsis thaliana protein match is: Mo25 family protein (T…
'35.1'	'not assigned.no ontology'	HORVU2Hr1G048110,2	10.0728	7.4229e-138	'(loc_os07g32350.2 : 302.0) no description available & (at1g29320 : 175.0) Transducin/WD40 repeat-like superfamily protein; CONTAINS InterPro DOMAIN/s: WD40 repeat-like-containing domain (InterPro:IPR011046), WD40-repeat-containing domain (InterPro:IPR017986), WD40 repeat (InterPro:IPR001680), WD40/YVTN repeat-like-containing domain (InterPro:IPR015943), WD40 repeat, subgroup (InterPro:IPR019781)…
'35.1'	'not assigned.no ontology'	HORVU3Hr1G057270,20	9.77479	2.0466e-207	'(loc_os01g13470.1 : 893.0) no description available & (at1g51580 : 218.0) RNA-binding KH domain-containing protein; FUNCTIONS IN: RNA binding, nucleic acid binding; EXPRESSED IN: 23 plant structures; EXPRESSED DURING: 13 growth stages; CONTAINS InterPro DOMAIN/s: K Homology, type 1, subgroup (InterPro:IPR018111), K Homology (InterPro:IPR004087), K Homology, type 1 (InterPro:IPR004088); BEST Arab…
'35.1'	'not assigned.no ontology'	HORVU3Hr1G084260,6	9.96434	3.79486e-125	'(loc_os05g12140.1 : 754.0) no description available & (at4g23840 : 384.0) Leucine-rich repeat (LRR) family protein; BEST Arabidopsis thaliana protein match is: Leucine-rich repeat family protein (TAIR:AT1G15740.1); Has 13188 Blast hits to 8222 proteins in 561 species: Archae - 2; Bacteria - 5781; Metazoa - 2271; Fungi - 110; Plants - 3199; Viruses - 40; Other Eukaryotes - 1785 (source: NCBI BLin…
'35.1'	'not assigned.no ontology'	HORVU5Hr1G053300,6	9.78627	1.37972e-47	'(loc_os09g10820.1 : 576.0) no description available & (at3g20790 : 415.0) NAD(P)-binding Rossmann-fold superfamily protein; FUNCTIONS IN: oxidoreductase activity, binding, catalytic activity; INVOLVED IN: oxidation reduction, metabolic process; EXPRESSED IN: 23 plant structures; EXPRESSED DURING: 15 growth stages; CONTAINS InterPro DOMAIN/s: Oxidoreductase, N-terminal (InterPro:IPR000683), Oxido…
'35.1'	'not assigned.no ontology'	HORVU5Hr1G088210,2	10.007	1.22189e-155	'(loc_os02g57070.1 : 251.0) no description available & (at5g38890 : 207.0) Nucleic acid-binding, OB-fold-like protein; FUNCTIONS IN: RNA binding; INVOLVED IN: biological_process unknown; LOCATED IN: cellular_component unknown; EXPRESSED IN: 22 plant structures; EXPRESSED DURING: 13 growth stages; CONTAINS InterPro DOMAIN/s: Ribosomal protein S1, RNA-binding domain (InterPro:IPR003029), Exosome co…
'35.1'	'not assigned.no ontology'	HORVU5Hr1G115230,4	10.0471	1.42883e-109	'(loc_os03g61130.1 : 927.0) no description available & (at1g07230 : 757.0) non-specific phospholipase C1 (NPC1); FUNCTIONS IN: hydrolase activity, acting on ester bonds; LOCATED IN: endomembrane system; EXPRESSED IN: 23 plant structures; EXPRESSED DURING: 13 growth stages; CONTAINS InterPro DOMAIN/s: Phosphoesterase (InterPro:IPR007312); BEST Arabidopsis thaliana protein match is: non-specific ph…
'35.1'	'not assigned.no ontology'	HORVU5Hr1G117920,6	9.72451	3.78882e-62	'(loc_os03g61950.1 : 870.0) no description available & (at2g36360 : 640.0) Galactose oxidase/kelch repeat superfamily protein; FUNCTIONS IN: molecular_function unknown; INVOLVED IN: biological_process unknown; LOCATED IN: cellular_component unknown; EXPRESSED IN: 22 plant structures; EXPRESSED DURING: 13 growth stages; CONTAINS InterPro DOMAIN/s: Galactose oxidase/kelch, beta-propeller (InterPro:…
'35.1'	'not assigned.no ontology'	HORVU7Hr1G059460,7	10.014	1.1881e-60	'(loc_os08g44530.1 : 802.0) no description available & (at3g23940 : 703.0) dehydratase family; CONTAINS InterPro DOMAIN/s: Dihydroxy-acid dehydratase (InterPro:IPR004404), Dihydroxy-acid/6-phosphogluconate dehydratase, conserved site (InterPro:IPR020558), Dihydroxy-acid/6-phosphogluconate dehydratase (InterPro:IPR000581). & (reliability: 1406.0) & (original description: no original description)'
'35.1.40'	'not assigned.no ontology.glycine rich proteins'	HORVU4Hr1G004410,1	10.0928	5.21654e-158	'(loc_os03g48260.1 : 221.0) no description available & (at1g27090 : 96.7) glycine-rich protein; BEST Arabidopsis thaliana protein match is: unknown protein (TAIR:AT3G24690.1); Has 13206 Blast hits to 7104 proteins in 677 species: Archae - 0; Bacteria - 2039; Metazoa - 5686; Fungi - 1146; Plants - 2571; Viruses - 80; Other Eukaryotes - 1684 (source: NCBI BLink). & (reliability: 193.4) & (original …
'35.1.5'	'not assigned.no ontology.pentatricopeptide (PPR) repeat-containing protein'	HORVU2Hr1G021860,27	9.94983	1.83434e-117	'(loc_os07g46770.1 : 833.0) no description available & (at5g40405 : 452.0) Tetratricopeptide repeat (TPR)-like superfamily protein; CONTAINS InterPro DOMAIN/s: Pentatricopeptide repeat (InterPro:IPR002885); BEST Arabidopsis thaliana protein match is: Tetratricopeptide repeat (TPR)-like superfamily protein (TAIR:AT5G66520.1); Has 34577 Blast hits to 13703 proteins in 254 species: Archae - 0; Bacte…
'35.1.5'	'not assigned.no ontology.pentatricopeptide (PPR) repeat-containing protein'	HORVU2Hr1G033970,6	10.1306	4.20834e-58	'(loc_os07g40800.1 : 760.0) no description available & (at1g26460 : 528.0) Tetratricopeptide repeat (TPR)-like superfamily protein; CONTAINS InterPro DOMAIN/s: Pentatricopeptide repeat (InterPro:IPR002885); BEST Arabidopsis thaliana protein match is: Pentatricopeptide repeat (PPR) superfamily protein (TAIR:AT3G53700.1); Has 8798 Blast hits to 4372 proteins in 169 species: Archae - 0; Bacteria - 0…
'35.2'	'not assigned.unknown'	HORVU0Hr1G010590,2	9.77314	5.20704e-118	'(loc_os11g03570.1 : 553.0) no description available & (at5g10060 : 243.0) ENTH/VHS family protein; FUNCTIONS IN: molecular_function unknown; INVOLVED IN: biological_process unknown; LOCATED IN: endomembrane system; CONTAINS InterPro DOMAIN/s: Protein of unknown function DUF618 (InterPro:IPR006903), RNA polymerase II, large subunit, CTD (InterPro:IPR006569), ENTH/VHS (InterPro:IPR008942); BEST Ar…
'35.2'	'not assigned.unknown'	HORVU1Hr1G000110,4	9.8009	1.90875e-26	'(at1g36320 : 436.0) unknown protein; BEST Arabidopsis thaliana protein match is: unknown protein (TAIR:AT4G37920.1); Has 93 Blast hits to 90 proteins in 22 species: Archae - 0; Bacteria - 0; Metazoa - 0; Fungi - 0; Plants - 85; Viruses - 0; Other Eukaryotes - 8 (source: NCBI BLink). & (loc_os01g20110.2 : 274.0) no description available & (reliability: 872.0) & (original description: no original …
'35.2'	'not assigned.unknown'	HORVU1Hr1G063310,2	10.0607	1.03688e-149	'(loc_os10g16440.1 : 446.0) no description available & (at1g03290 : 197.0) unknown protein; FUNCTIONS IN: molecular_function unknown; INVOLVED IN: biological_process unknown; LOCATED IN: cellular_component unknown; EXPRESSED IN: 22 plant structures; EXPRESSED DURING: 13 growth stages; BEST Arabidopsis thaliana protein match is: unknown protein (TAIR:AT4G02880.2). & (reliability: 394.0) & (origina…
'35.2'	'not assigned.unknown'	HORVU1Hr1G064040,2	9.93811	0	' no hits & (original description: no original description)'
'35.2'	'not assigned.unknown'	HORVU1Hr1G095410,5	10.151	1.0231e-73	'(loc_os05g51690.2 : 233.0) no description available & (at5g53420 : 122.0) CCT motif family protein; FUNCTIONS IN: molecular_function unknown; INVOLVED IN: biological_process unknown; LOCATED IN: cellular_component unknown; EXPRESSED IN: 23 plant structures; EXPRESSED DURING: 13 growth stages; BEST Arabidopsis thaliana protein match is: CCT motif family protein (TAIR:AT4G27900.2); Has 30201 Blast…
'35.2'	'not assigned.unknown'	HORVU2Hr1G045100,8	9.83763	1.06033e-166	' (original description: no original description)'
'35.2'	'not assigned.unknown'	HORVU2Hr1G079780,7	11.8218	0	'(loc_os04g38310.2 : 409.0) no description available & (at4g39860 : 276.0) unknown protein; BEST Arabidopsis thaliana protein match is: unknown protein (TAIR:AT2G22270.1); Has 148 Blast hits to 144 proteins in 18 species: Archae - 0; Bacteria - 0; Metazoa - 0; Fungi - 0; Plants - 144; Viruses - 0; Other Eukaryotes - 4 (source: NCBI BLink). & (reliability: 552.0) & (original description: no origin…
'35.2'	'not assigned.unknown'	HORVU2Hr1G080440,1	10.0056	8.96462e-187	' no hits & (original description: no original description)'
'35.2'	'not assigned.unknown'	HORVU2Hr1G102040,18	9.84078	2.66918e-93	' (original description: no original description)'
'35.2'	'not assigned.unknown'	HORVU2Hr1G108150,1	9.85331	4.46696e-30	'(loc_os02g22380.1 : 643.0) no description available & (at3g18170 : 258.0) Glycosyltransferase family 61 protein; FUNCTIONS IN: transferase activity, transferring glycosyl groups; INVOLVED IN: biological_process unknown; LOCATED IN: cellular_component unknown; EXPRESSED IN: 8 plant structures; EXPRESSED DURING: petal differentiation and expansion stage; CONTAINS InterPro DOMAIN/s: Glycosyltransfe…
'35.2'	'not assigned.unknown'	HORVU3Hr1G014080,9	9.84235	4.13688e-86	' (original description: no original description)'
'35.2'	'not assigned.unknown'	HORVU3Hr1G048310,1	9.81698	2.17178e-37	'(loc_os01g37832.4 : 179.0) no description available & (at2g25950 : 154.0) CONTAINS InterPro DOMAIN/s: Proteasome-interacting thioredoxin-like domain, C-terminal (InterPro:IPR010400); BEST Arabidopsis thaliana protein match is: Protein of unknown function (DUF1000) (TAIR:AT3G04780.1); Has 551 Blast hits to 551 proteins in 191 species: Archae - 0; Bacteria - 0; Metazoa - 233; Fungi - 139; Plants -…
'35.2'	'not assigned.unknown'	HORVU3Hr1G067530,10	9.75822	1.1908e-50	' no hits & (original description: no original description)'
'35.2'	'not assigned.unknown'	HORVU3Hr1G077890,1	9.92184	9.19936e-131	' (original description: no original description)'
'35.2'	'not assigned.unknown'	HORVU3Hr1G098920,5	10.0539	4.01052e-72	' (original description: no original description)'
'35.2'	'not assigned.unknown'	HORVU4Hr1G012070,2	9.78136	1.71942e-114	' no hits & (original description: no original description)'
'35.2'	'not assigned.unknown'	HORVU4Hr1G016410,7	10.1874	8.3166e-55	' no hits & (original description: no original description)'
'35.2'	'not assigned.unknown'	HORVU4Hr1G041810,3	10.1408	4.07856e-200	' no hits & (original description: no original description)'
'35.2'	'not assigned.unknown'	HORVU5Hr1G059820,4	9.92778	1.43577e-236	'(loc_os09g21460.1 : 200.0) no description available & (at1g10522 : 125.0) unknown protein; FUNCTIONS IN: molecular_function unknown; INVOLVED IN: biological_process unknown; LOCATED IN: chloroplast; EXPRESSED IN: 23 plant structures; EXPRESSED DURING: 13 growth stages; Has 24 Blast hits to 24 proteins in 8 species: Archae - 0; Bacteria - 0; Metazoa - 0; Fungi - 0; Plants - 24; Viruses - 0; Other…
'35.2'	'not assigned.unknown'	HORVU5Hr1G062160,8	9.7364	7.30082e-80	'(loc_os09g26830.1 : 874.0) no description available & (at1g72480 : 613.0) Lung seven transmembrane receptor family protein; CONTAINS InterPro DOMAIN/s: Transmembrane receptor, eukaryota (InterPro:IPR009637); BEST Arabidopsis thaliana protein match is: Lung seven transmembrane receptor family protein (TAIR:AT2G01070.1); Has 596 Blast hits to 594 proteins in 172 species: Archae - 0; Bacteria - 0; …
'35.2'	'not assigned.unknown'	HORVU5Hr1G071040,1	9.74987	1.05959e-115	' (original description: no original description)'
'35.2'	'not assigned.unknown'	HORVU5Hr1G084900,4	10.0098	1.64297e-199	' no hits & (original description: no original description)'
'35.2'	'not assigned.unknown'	HORVU5Hr1G106970,2	10.007	1.68986e-49	'(loc_os02g29320.1 : 226.0) no description available & (at1g79390 : 187.0) unknown protein; Has 30201 Blast hits to 17322 proteins in 780 species: Archae - 12; Bacteria - 1396; Metazoa - 17338; Fungi - 3422; Plants - 5037; Viruses - 0; Other Eukaryotes - 2996 (source: NCBI BLink). & (reliability: 374.0) & (original description: no original description)'
'35.2'	'not assigned.unknown'	HORVU6Hr1G013580,1	9.88722	2.51156e-143	' (original description: no original description)'
'35.2'	'not assigned.unknown'	HORVU6Hr1G027760,9	10.1898	8.47254e-151	'(loc_os02g07180.1 : 331.0) no description available & (at1g06660 : 82.8) unknown protein; BEST Arabidopsis thaliana protein match is: unknown protein (TAIR:AT2G30820.2); Has 166 Blast hits to 144 proteins in 35 species: Archae - 0; Bacteria - 17; Metazoa - 13; Fungi - 20; Plants - 104; Viruses - 0; Other Eukaryotes - 12 (source: NCBI BLink). & (reliability: 165.6) & (original description: no ori…
'35.2'	'not assigned.unknown'	HORVU6Hr1G072740,2	9.99294	9.70054e-59	'(loc_os02g49680.1 : 432.0) no description available & (at5g23060 : 310.0) Encodes a chloroplast-localized protein that modulates cytoplasmic Ca2+ concentration and is crucial for proper stomatal regulation in response to elevations of external Ca2+.; calcium sensing receptor (CaS); INVOLVED IN: regulation of stomatal closure, cellular response to calcium ion; LOCATED IN: thylakoid, mitochondrion…
'35.2'	'not assigned.unknown'	HORVU6Hr1G082160,9	9.91737	0	'(loc_os02g54080.1 : 306.0) no description available & (at5g49710 : 205.0) unknown protein; BEST Arabidopsis thaliana protein match is: unknown protein (TAIR:AT4G24590.1); Has 35333 Blast hits to 34131 proteins in 2444 species: Archae - 798; Bacteria - 22429; Metazoa - 974; Fungi - 991; Plants - 531; Viruses - 0; Other Eukaryotes - 9610 (source: NCBI BLink). & (reliability: 410.0) & (original des…
'35.2'	'not assigned.unknown'	HORVU7Hr1G053130,3	10.0768	3.20246e-213	' (original description: no original description)'
'35.2'	'not assigned.unknown'	HORVU7Hr1G060970,3	10.1624	0	'(loc_os08g45080.1 : 731.0) no description available & (at1g15780 : 514.0) unknown protein; BEST Arabidopsis thaliana protein match is: unknown protein (TAIR:AT2G10440.1); Has 103701 Blast hits to 43153 proteins in 1828 species: Archae - 30; Bacteria - 7385; Metazoa - 38639; Fungi - 11531; Plants - 7727; Viruses - 307; Other Eukaryotes - 38082 (source: NCBI BLink). & (reliability: 1028.0) & (orig…
'35.2'	'not assigned.unknown'	HORVU7Hr1G065990,4	9.86573	1.31487e-61	'(loc_os08g15500.1 : 423.0) no description available & (at3g21200 : 273.0) proton gradient regulation 7 (PGR7); Has 162 Blast hits to 162 proteins in 45 species: Archae - 0; Bacteria - 40; Metazoa - 0; Fungi - 0; Plants - 91; Viruses - 0; Other Eukaryotes - 31 (source: NCBI BLink). & (reliability: 546.0) & (original description: no original description)'
'35.2'	'not assigned.unknown'	HORVU7Hr1G079430,6	9.84706	1.56293e-192	' no hits & (original description: no original description)'
'35.2'	'not assigned.unknown'	HORVU7Hr1G080070,5	9.86109	1.13093e-98	' (original description: no original description)'
'35.2'	'not assigned.unknown'	HORVU7Hr1G090920,3	10.2021	5.22118e-152	'(loc_os06g40740.1 : 459.0) no description available & (at5g50350 : 120.0) unknown protein; FUNCTIONS IN: molecular_function unknown; INVOLVED IN: response to oxidative stress; LOCATED IN: chloroplast; EXPRESSED IN: 22 plant structures; EXPRESSED DURING: 13 growth stages; Has 1807 Blast hits to 1807 proteins in 277 species: Archae - 0; Bacteria - 0; Metazoa - 736; Fungi - 347; Plants - 385; Virus…
'35.2'	'not assigned.unknown'	HORVU7Hr1G091220,5	10.1215	1.95859e-131	'(loc_os06g49990.3 : 779.0) no description available & (at3g51130 : 680.0) unknown protein; CONTAINS InterPro DOMAIN/s: Uncharacterised protein family UPF0183 (InterPro:IPR005373); Has 269 Blast hits to 265 proteins in 123 species: Archae - 0; Bacteria - 0; Metazoa - 131; Fungi - 82; Plants - 37; Viruses - 0; Other Eukaryotes - 19 (source: NCBI BLink). & (reliability: 1360.0) & (original descript…
'35.2'	'not assigned.unknown'	HORVU7Hr1G100310,15	10.1254	2.69576e-162	' (original description: no original description)'
'35.2'	'not assigned.unknown'	HORVU7Hr1G119590,3	9.97585	1.13226e-74	'(loc_os06g51510.1 : 281.0) no description available & (at2g20760 : 185.0) Clathrin light chain protein; FUNCTIONS IN: structural molecule activity; INVOLVED IN: intracellular protein transport, vesicle-mediated transport; LOCATED IN: plasma membrane; EXPRESSED IN: 23 plant structures; EXPRESSED DURING: 15 growth stages; CONTAINS InterPro DOMAIN/s: Clathrin light chain (InterPro:IPR000996); BEST …
'35.2'	'not assigned.unknown'	HORVU1Hr1G050900,10	9.71425	1.0583e-56	'(loc_os10g34580.2 : 179.0) no description available & (at3g02680 : 91.7) DNA repair and meiotic recombination protein, component of MRE11 complex with RAD50 and MRE11; nijmegen breakage syndrome 1 (NBS1); CONTAINS InterPro DOMAIN/s: SMAD/FHA domain (InterPro:IPR008984), Forkhead-associated (FHA) domain (InterPro:IPR000253); Has 164 Blast hits to 161 proteins in 63 species: Archae - 0; Bacteria -…
'35.2'	'not assigned.unknown'	HORVU2Hr1G019500,8	9.71081	2.05222e-105	' no hits & (original description: no original description)'
'35.2'	'not assigned.unknown'	HORVU3Hr1G042680,9	9.7211	4.59312e-124	'(loc_os01g31360.5 : 367.0) no description available & (at3g54500 : 82.4) FUNCTIONS IN: molecular_function unknown; INVOLVED IN: biological_process unknown; LOCATED IN: cellular_component unknown; EXPRESSED IN: 22 plant structures; EXPRESSED DURING: 13 growth stages; BEST Arabidopsis thaliana protein match is: dentin sialophosphoprotein-related (TAIR:AT5G64170.2). & (reliability: 164.8) & (origin…
'35.2'	'not assigned.unknown'	HORVU7Hr1G025440,1	9.71768	4.93448e-53	' no hits & (original description: no original description)'
'35.2'	'not assigned.unknown'	HORVU2Hr1G009840,14	11.1039	0	' (original description: no original description)'
'35.2'	'not assigned.unknown'	HORVU2Hr1G014020,6	11.3896	8.47254e-151	' (original description: no original description)'

## Sheet: C1-22_7DAP_downregulated
List of downregulated genes identified in 7DAP spikes of ckx1 mutant line C1-22. Functional annotation was performed using Mercator sequence annotation tool.
BINCODE	NAME	IDENTIFIER	Log2 fold change	P value	DESCRIPTION
'1.1.1.1'	'PS.lightreaction.photosystem II.LHC-II'	HORVU1Hr1G088920,2	-10.0821	0	'(p04784|cb21_wheat : 489.0) Chlorophyll a-b binding protein, chloroplast precursor (LHCII type I CAB) (LHCP) - Triticum aestivum (Wheat) & (loc_os01g52240.1 : 477.0) no description available & (at2g34420 : 449.0) Photosystem II type I chlorophyll a/b-binding protein; photosystem II light harvesting complex gene B1B2 (LHB1B2); FUNCTIONS IN: chlorophyll binding; INVOLVED IN: photosynthesis, light …
'1.1.1.1'	'PS.lightreaction.photosystem II.LHC-II'	HORVU2Hr1G010690,13	-10.6312	0	'(p27523|cb23_horvu : 549.0) Chlorophyll a-b binding protein of LHCII type III, chloroplast precursor (CAB) - Hordeum vulgare (Barley) & (loc_os07g37550.1 : 480.0) no description available & (at5g54270 : 472.0) Lhcb3 protein is a component of the main light harvesting chlorophyll a/b-protein complex of Photosystem II (LHC II).; light-harvesting chlorophyll B-binding protein 3 (LHCB3); FUNCTIONS I…
'1.1.1.1'	'PS.lightreaction.photosystem II.LHC-II'	HORVU2Hr1G040780,6	-10.4315	0	'(p27523|cb23_horvu : 530.0) Chlorophyll a-b binding protein of LHCII type III, chloroplast precursor (CAB) - Hordeum vulgare (Barley) & (at5g54270 : 463.0) Lhcb3 protein is a component of the main light harvesting chlorophyll a/b-protein complex of Photosystem II (LHC II).; light-harvesting chlorophyll B-binding protein 3 (LHCB3); FUNCTIONS IN: structural molecule activity; INVOLVED IN: photosyn…
'1.1.1.1'	'PS.lightreaction.photosystem II.LHC-II'	HORVU4Hr1G050630,2	-11.2848	0	'(p27523|cb23_horvu : 335.0) Chlorophyll a-b binding protein of LHCII type III, chloroplast precursor (CAB) - Hordeum vulgare (Barley) & (at5g54270 : 318.0) Lhcb3 protein is a component of the main light harvesting chlorophyll a/b-protein complex of Photosystem II (LHC II).; light-harvesting chlorophyll B-binding protein 3 (LHCB3); FUNCTIONS IN: structural molecule activity; INVOLVED IN: photosyn…
'1.1.1.1'	'PS.lightreaction.photosystem II.LHC-II'	HORVU4Hr1G074810,7	-10.2715	6.15772e-235	'(p27523|cb23_horvu : 459.0) Chlorophyll a-b binding protein of LHCII type III, chloroplast precursor (CAB) - Hordeum vulgare (Barley) & (at5g54270 : 437.0) Lhcb3 protein is a component of the main light harvesting chlorophyll a/b-protein complex of Photosystem II (LHC II).; light-harvesting chlorophyll B-binding protein 3 (LHCB3); FUNCTIONS IN: structural molecule activity; INVOLVED IN: photosyn…
'1.1.1.1'	'PS.lightreaction.photosystem II.LHC-II'	HORVU5Hr1G125130,3	-12.4155	0	'(p27523|cb23_horvu : 530.0) Chlorophyll a-b binding protein of LHCII type III, chloroplast precursor (CAB) - Hordeum vulgare (Barley) & (at5g54270 : 462.0) Lhcb3 protein is a component of the main light harvesting chlorophyll a/b-protein complex of Photosystem II (LHC II).; light-harvesting chlorophyll B-binding protein 3 (LHCB3); FUNCTIONS IN: structural molecule activity; INVOLVED IN: photosyn…
'1.1.6'	'PS.lightreaction.NADH DH'	HORVU2Hr1G044860,1	-9.91737	1.85953e-99	'(p58420|nu4c_wheat : 305.0) NAD(P)H-quinone oxidoreductase chain 4, chloroplast (EC 1.6.5.-) (NAD(P)H dehydrogenase, chain 4) (NADH-plastoquinone oxidoreductase chain 4) - Triticum aestivum (Wheat) & (loc_osp1g00910.1 : 298.0) no description available & (atcg01050 : 262.0) Represents a plastid-encoded subunit of a NAD(P)H dehydrogenase complex. Its mRNA is edited at four positions. Translation d…
'1.2.2'	'PS.photorespiration.glycolate oxydase'	HORVU0Hr1G013900,4	-9.95565	0	'(loc_os03g57220.2 : 477.0) no description available & (at3g14415 : 449.0) Aldolase-type TIM barrel family protein; FUNCTIONS IN: glycolate oxidase activity, oxidoreductase activity, FMN binding, catalytic activity; INVOLVED IN: oxidation reduction, metabolic process; LOCATED IN: peroxisome; EXPRESSED IN: guard cell, leaf; CONTAINS InterPro DOMAIN/s: Aldolase-type TIM barrel (InterPro:IPR013785),…
'1.3.13'	'PS.calvin cycle.rubisco interacting'	HORVU2Hr1G007840,6	-9.7364	0	'(loc_os12g17910.1 : 984.0) no description available & (p08823|ruba_wheat : 982.0) RuBisCO large subunit-binding protein subunit alpha, chloroplast precursor (60 kDa chaperonin subunit alpha) (CPN-60 alpha) (Fragment) - Triticum aestivum (Wheat) & (at2g28000 : 872.0) Encodes chaperonin-60 alpha, a molecular chaperone involved in Rubisco folding. Mutants display aberrant chloroplast and embryo dev…
'2.1.1.1'	'major CHO metabolism.synthesis.sucrose.SPS'	HORVU4Hr1G015570,3	-9.86419	5.71452e-155	'(loc_os11g12810.1 : 749.0) no description available & (at4g10120 : 613.0) Encodes a protein with putative sucrose-phosphate synthase activity.; ATSPS4F; FUNCTIONS IN: transferase activity, transferring glycosyl groups; INVOLVED IN: biosynthetic process, sucrose metabolic process; LOCATED IN: plasma membrane; EXPRESSED IN: 19 plant structures; EXPRESSED DURING: 10 growth stages; CONTAINS InterPro…
'2.1.1.3'	'major CHO metabolism.synthesis.sucrose.FBPase'	HORVU1Hr1G075680,4	-10.5147	1.04632e-228	'(q43139|f16p2_sachy : 624.0) Fructose-1,6-bisphosphatase, cytosolic (EC 3.1.3.11) (D-fructose-1,6-bisphosphate 1-phosphohydrolase) (FBPase) - Saccharum hybrid (Sugarcane) & (loc_os01g64660.2 : 622.0) no description available & (at1g43670 : 579.0) Inositol monophosphatase family protein; FUNCTIONS IN: fructose 1,6-bisphosphate 1-phosphatase activity, phosphoric ester hydrolase activity; INVOLVED …
'2.1.1.3'	'major CHO metabolism.synthesis.sucrose.FBPase'	HORVU2Hr1G072500,32	-11.2808	0	'(q43139|f16p2_sachy : 624.0) Fructose-1,6-bisphosphatase, cytosolic (EC 3.1.3.11) (D-fructose-1,6-bisphosphate 1-phosphohydrolase) (FBPase) - Saccharum hybrid (Sugarcane) & (loc_os01g64660.2 : 620.0) no description available & (at1g43670 : 579.0) Inositol monophosphatase family protein; FUNCTIONS IN: fructose 1,6-bisphosphate 1-phosphatase activity, phosphoric ester hydrolase activity; INVOLVED …
'2.1.1.3'	'major CHO metabolism.synthesis.sucrose.FBPase'	HORVU3Hr1G083350,14	-10.3542	0	'(q43139|f16p2_sachy : 628.0) Fructose-1,6-bisphosphatase, cytosolic (EC 3.1.3.11) (D-fructose-1,6-bisphosphate 1-phosphohydrolase) (FBPase) - Saccharum hybrid (Sugarcane) & (loc_os01g64660.2 : 626.0) no description available & (at1g43670 : 585.0) Inositol monophosphatase family protein; FUNCTIONS IN: fructose 1,6-bisphosphate 1-phosphatase activity, phosphoric ester hydrolase activity; INVOLVED …
'2.1.1.3'	'major CHO metabolism.synthesis.sucrose.FBPase'	HORVU7Hr1G025390,8	-11.9244	0	'(loc_os01g64660.1 : 532.0) no description available & (o64421|f16p2_orysa : 527.0) Fructose-1,6-bisphosphatase, cytosolic (EC 3.1.3.11) (D-fructose-1,6-bisphosphate 1-phosphohydrolase) (FBPase) - Oryza sativa (Rice) & (at1g43670 : 483.0) Inositol monophosphatase family protein; FUNCTIONS IN: fructose 1,6-bisphosphate 1-phosphatase activity, phosphoric ester hydrolase activity; INVOLVED IN: carbo…
'2.1.2.2'	'major CHO metabolism.synthesis.starch.starch synthase'	HORVU2Hr1G030870,9	-13.1466	0	'(q43654|ssy1_wheat : 1078.0) Starch synthase 1, chloroplast precursor (EC 2.4.1.21) (SS I) (Starch synthase I-2) (SS I-2) - Triticum aestivum (Wheat) & (loc_os06g06560.1 : 1009.0) no description available & (at5g24300 : 815.0) SSI is a plastidial enzyme and crucial for the synthesis of normal amylopectin in the leaves of Arabidopsis. The absence of SSI results in a deficiency in the number of sh…
'2.1.2.2'	'major CHO metabolism.synthesis.starch.starch synthase'	HORVU3Hr1G007190,9	-11.3214	0	'(q43654|ssy1_wheat : 1055.0) Starch synthase 1, chloroplast precursor (EC 2.4.1.21) (SS I) (Starch synthase I-2) (SS I-2) - Triticum aestivum (Wheat) & (loc_os06g06560.1 : 972.0) no description available & (at5g24300 : 740.0) SSI is a plastidial enzyme and crucial for the synthesis of normal amylopectin in the leaves of Arabidopsis. The absence of SSI results in a deficiency in the number of sho…
'2.1.2.2'	'major CHO metabolism.synthesis.starch.starch synthase'	HORVU3Hr1G032490,3	-11.2246	9.0714e-216	'(q43654|ssy1_wheat : 488.0) Starch synthase 1, chloroplast precursor (EC 2.4.1.21) (SS I) (Starch synthase I-2) (SS I-2) - Triticum aestivum (Wheat) & (loc_os06g06560.1 : 430.0) no description available & (at5g24300 : 303.0) SSI is a plastidial enzyme and crucial for the synthesis of normal amylopectin in the leaves of Arabidopsis. The absence of SSI results in a deficiency in the number of shor…
'2.1.2.2'	'major CHO metabolism.synthesis.starch.starch synthase'	HORVU5Hr1G096390,6	-12.3197	0	'(q43654|ssy1_wheat : 1137.0) Starch synthase 1, chloroplast precursor (EC 2.4.1.21) (SS I) (Starch synthase I-2) (SS I-2) - Triticum aestivum (Wheat) & (loc_os06g06560.1 : 1046.0) no description available & (at5g24300 : 815.0) SSI is a plastidial enzyme and crucial for the synthesis of normal amylopectin in the leaves of Arabidopsis. The absence of SSI results in a deficiency in the number of sh…
'2.1.2.2'	'major CHO metabolism.synthesis.starch.starch synthase'	HORVU7Hr1G008070,7	-10.5527	0	'(q43654|ssy1_wheat : 1078.0) Starch synthase 1, chloroplast precursor (EC 2.4.1.21) (SS I) (Starch synthase I-2) (SS I-2) - Triticum aestivum (Wheat) & (loc_os06g06560.1 : 1009.0) no description available & (at5g24300 : 815.0) SSI is a plastidial enzyme and crucial for the synthesis of normal amylopectin in the leaves of Arabidopsis. The absence of SSI results in a deficiency in the number of sh…
'2.1.2.3'	'major CHO metabolism.synthesis.starch.starch branching'	HORVU0Hr1G022810,18	-9.67772	1.2801e-39	'(q01401|glgb_orysa : 991.0) 1,4-alpha-glucan branching enzyme, chloroplast precursor (EC 2.4.1.18) (Starch branching enzyme) (Q-enzyme) - Oryza sativa (Rice) & (loc_os06g51084.1 : 991.0) no description available & (at5g03650 : 628.0) Encodes starch branching enzyme (E.C.2.4.1.18) similar to SBE2 from maize and rice. Expressed throughout the plant and highest in seedlings and cauline leaves.; sta…
'2.2.2.4'	'major CHO metabolism.degradation.starch.D enzyme'	HORVU1Hr1G073510,19	-9.71253	0	'(loc_os05g37450.1 : 305.0) no description available & (at5g01260 : 130.0) Carbohydrate-binding-like fold; FUNCTIONS IN: carbohydrate binding, catalytic activity; INVOLVED IN: carbohydrate metabolic process; LOCATED IN: cellular_component unknown; EXPRESSED IN: 21 plant structures; EXPRESSED DURING: 13 growth stages; CONTAINS InterPro DOMAIN/s: Immunoglobulin-like fold (InterPro:IPR013783), Carbo…
'3.1.2.2'	'minor CHO metabolism.raffinose family.raffinose synthases.putative'	HORVU3Hr1G020780,10	-10.7895	3.9443e-118	'(loc_os07g10840.1 : 1284.0) no description available & (at3g57520 : 1089.0) seed imbibition 2 (SIP2); CONTAINS InterPro DOMAIN/s: Glycoside hydrolase, catalytic core (InterPro:IPR017853), Raffinose synthase (InterPro:IPR008811); BEST Arabidopsis thaliana protein match is: seed imbibition 1 (TAIR:AT1G55740.1); Has 35333 Blast hits to 34131 proteins in 2444 species: Archae - 798; Bacteria - 22429;…
'3.1.2.2'	minor CHO metabolism.raffinose family.raffinose synthases.putative'	HORVU4Hr1G008470,5	-10.2479	1.23547e-144	'(loc_os07g10840.1 : 979.0) no description available & (at3g57520 : 847.0) seed imbibition 2 (SIP2); CONTAINS InterPro DOMAIN/s: Glycoside hydrolase, catalytic core (InterPro:IPR017853), Raffinose synthase (InterPro:IPR008811); BEST Arabidopsis thaliana protein match is: seed imbibition 1 (TAIR:AT1G55740.1); Has 35333 Blast hits to 34131 proteins in 2444 species: Archae - 798; Bacteria - 22429; M…
'3.1.2.2'	'minor CHO metabolism.raffinose family.raffinose synthases.putative'	HORVU4Hr1G071730,6	-12.275	0	'(loc_os07g10840.1 : 991.0) no description available & (at3g57520 : 889.0) seed imbibition 2 (SIP2); CONTAINS InterPro DOMAIN/s: Glycoside hydrolase, catalytic core (InterPro:IPR017853), Raffinose synthase (InterPro:IPR008811); BEST Arabidopsis thaliana protein match is: seed imbibition 1 (TAIR:AT1G55740.1); Has 35333 Blast hits to 34131 proteins in 2444 species: Archae - 798; Bacteria - 22429; M…
'3.1.2.2'	'minor CHO metabolism.raffinose family.raffinose synthases.putative'	HORVU5Hr1G056390,6	-10.5603	5.9503e-226	'(loc_os07g10840.1 : 1008.0) no description available & (at3g57520 : 894.0) seed imbibition 2 (SIP2); CONTAINS InterPro DOMAIN/s: Glycoside hydrolase, catalytic core (InterPro:IPR017853), Raffinose synthase (InterPro:IPR008811); BEST Arabidopsis thaliana protein match is: seed imbibition 1 (TAIR:AT1G55740.1); Has 35333 Blast hits to 34131 proteins in 2444 species: Archae - 798; Bacteria - 22429; …
'3.1.2.2'	'minor CHO metabolism.raffinose family.raffinose synthases.putative'	HORVU6Hr1G013800,3	-10.9091	0	'(loc_os07g10840.1 : 775.0) no description available & (at3g57520 : 697.0) seed imbibition 2 (SIP2); CONTAINS InterPro DOMAIN/s: Glycoside hydrolase, catalytic core (InterPro:IPR017853), Raffinose synthase (InterPro:IPR008811); BEST Arabidopsis thaliana protein match is: seed imbibition 1 (TAIR:AT1G55740.1); Has 35333 Blast hits to 34131 proteins in 2444 species: Archae - 798; Bacteria - 22429; M…
'3.2.3'	'minor CHO metabolism.trehalose.potential TPS/TPP'	HORVU5Hr1G060460,5	-9.60733	0	'(loc_os09g23350.1 : 1445.0) no description available & (at1g68020 : 1261.0) Encodes an enzyme putatively involved in trehalose biosynthesis. The protein has a trehalose synthase (TPS)-like domain and a trehalose phosphatase (TPP)-like domain. It can complement a yeast mutant lacking both of these activities suggesting that this is a bifunctional enzyme.; ATTPS6; CONTAINS InterPro DOMAIN/s: HAD-s…
'3.5'	'minor CHO metabolism.others'	HORVU1Hr1G090020,1	-9.60548	5.0519e-112	'(loc_os05g49430.1 : 446.0) no description available & (at3g61610 : 393.0) Galactose mutarotase-like superfamily protein; FUNCTIONS IN: carbohydrate binding, isomerase activity, aldose 1-epimerase activity, catalytic activity; INVOLVED IN: galactose metabolic process, N-terminal protein myristoylation, carbohydrate metabolic process; LOCATED IN: cellular_component unknown; EXPRESSED IN: 17 plant …
'3.6'	'minor CHO metabolism.callose'	HORVU4Hr1G085510,9	-10.1189	0	'(at3g07160 : 1087.0) Encodes GSL10, a member of the Glucan Synthase-Like (GSL) family believed to be involved in the synthesis of the cell wall component callose. GSL10 is required for male gametophyte development and plant growth. Has a role in entry of microspores into mitosis. GSL10 mutation leads to perturbation of microspore division symmetry, irregular callose deposition and failure of gen…
'4.1.14'	'glycolysis.cytosolic branch.pyruvate kinase (PK)'	HORVU1Hr1G075550,8	-10.2597	2.0313e-187	'(loc_os11g05110.2 : 684.0) no description available & (at3g52990 : 625.0) Pyruvate kinase family protein; FUNCTIONS IN: pyruvate kinase activity, magnesium ion binding, potassium ion binding, catalytic activity; INVOLVED IN: glycolysis; LOCATED IN: membrane; EXPRESSED IN: guard cell, cultured cell, leaf; CONTAINS InterPro DOMAIN/s: Pyruvate/Phosphoenolpyruvate kinase, catalytic core (InterPro:IP…
'4.1.14'	'glycolysis.cytosolic branch.pyruvate kinase (PK)'	HORVU3Hr1G073020,9	-10.3652	1.72718e-203	'(loc_os11g05110.2 : 636.0) no description available & (at3g52990 : 584.0) Pyruvate kinase family protein; FUNCTIONS IN: pyruvate kinase activity, magnesium ion binding, potassium ion binding, catalytic activity; INVOLVED IN: glycolysis; LOCATED IN: membrane; EXPRESSED IN: guard cell, cultured cell, leaf; CONTAINS InterPro DOMAIN/s: Pyruvate/Phosphoenolpyruvate kinase, catalytic core (InterPro:IP…
'4.1.14'	'glycolysis.cytosolic branch.pyruvate kinase (PK)'	HORVU5Hr1G027250,16	-10.4231	4.06038e-186	'(loc_os11g05110.2 : 474.0) no description available & (at3g52990 : 419.0) Pyruvate kinase family protein; FUNCTIONS IN: pyruvate kinase activity, magnesium ion binding, potassium ion binding, catalytic activity; INVOLVED IN: glycolysis; LOCATED IN: membrane; EXPRESSED IN: guard cell, cultured cell, leaf; CONTAINS InterPro DOMAIN/s: Pyruvate/Phosphoenolpyruvate kinase, catalytic core (InterPro:IP…
'4.1.14'	'glycolysis.cytosolic branch.pyruvate kinase (PK)'	HORVU5Hr1G041120,5	-10.8138	0	'(loc_os11g05110.2 : 887.0) no description available & (at3g52990 : 825.0) Pyruvate kinase family protein; FUNCTIONS IN: pyruvate kinase activity, magnesium ion binding, potassium ion binding, catalytic activity; INVOLVED IN: glycolysis; LOCATED IN: membrane; EXPRESSED IN: guard cell, cultured cell, leaf; CONTAINS InterPro DOMAIN/s: Pyruvate/Phosphoenolpyruvate kinase, catalytic core (InterPro:IP…
'4.1.14'	'glycolysis.cytosolic branch.pyruvate kinase (PK)'	HORVU6Hr1G048410,6	-11.1793	0	'(loc_os11g05110.2 : 936.0) no description available & (at3g52990 : 868.0) Pyruvate kinase family protein; FUNCTIONS IN: pyruvate kinase activity, magnesium ion binding, potassium ion binding, catalytic activity; INVOLVED IN: glycolysis; LOCATED IN: membrane; EXPRESSED IN: guard cell, cultured cell, leaf; CONTAINS InterPro DOMAIN/s: Pyruvate/Phosphoenolpyruvate kinase, catalytic core (InterPro:IP…
'4.1.14'	'glycolysis.cytosolic branch.pyruvate kinase (PK)'	HORVU7Hr1G040550,7	-10.3718	5.94488e-105	'(loc_os11g05110.2 : 979.0) no description available & (at3g52990 : 910.0) Pyruvate kinase family protein; FUNCTIONS IN: pyruvate kinase activity, magnesium ion binding, potassium ion binding, catalytic activity; INVOLVED IN: glycolysis; LOCATED IN: membrane; EXPRESSED IN: guard cell, cultured cell, leaf; CONTAINS InterPro DOMAIN/s: Pyruvate/Phosphoenolpyruvate kinase, catalytic core (InterPro:IP…
'5.10'	fermentation.aldehyde dehydrogenase'	HORVU5Hr1G062090,7	-12.2912	0	'(loc_os09g26880.4 : 641.0) no description available & (q9zpb7|al7a1_maldo : 586.0) Aldehyde dehydrogenase family 7 member A1 (EC 1.2.1.3) (Antiquitin-1) (Matured fruit 60 kDa protein) (MF-60) - Malus domestica (Apple) (Malus sylvestris) & (at1g54100 : 572.0) Aldehyde dehydrogenase; aldehyde dehydrogenase 7B4 (ALDH7B4); FUNCTIONS IN: 3-chloroallyl aldehyde dehydrogenase activity, oxidoreductase a…
'6.3'	'gluconeogenesis / glyoxylate cycle.Malate DH'	HORVU5Hr1G098890,11	-11.8857	0	'(loc_os03g56280.1 : 362.0) no description available & (q42972|mdhg_orysa : 333.0) Malate dehydrogenase, glyoxysomal precursor (EC 1.1.1.37) - Oryza sativa (Rice) & (at5g09660 : 327.0) encodes a microbody NAD-dependent malate dehydrogenase encodes an peroxisomal NAD-malate dehydrogenase that is involved in fatty acid beta-oxidation through providing NAD to the process of converting fatty acyl CoA…
'7.2.2'	'OPP.non-reductive PP.transaldolase'	HORVU3Hr1G096050,2	-9.69349	3.52564e-128	'(loc_os01g70170.1 : 514.0) no description available & (at5g13420 : 474.0) Aldolase-type TIM barrel family protein; FUNCTIONS IN: catalytic activity, transaldolase activity; INVOLVED IN: response to cadmium ion; LOCATED IN: mitochondrion, chloroplast stroma, chloroplast; EXPRESSED IN: 25 plant structures; EXPRESSED DURING: 15 growth stages; CONTAINS InterPro DOMAIN/s: Transaldolase subfamily (Int…
'7.3'	'OPP.electron transfer'	HORVU5Hr1G103180,7	-9.79442	6.1958e-297	'(p41345|fenr2_orysa : 538.0) Ferredoxin--NADP reductase, root isozyme, chloroplast precursor (EC 1.18.1.2) (FNR) - Oryza sativa (Rice) & (loc_os03g57120.1 : 538.0) no description available & (at1g30510 : 483.0) Encodes a root-type ferredoxin:NADP(H) oxidoreductase.; root FNR 2 (RFNR2); FUNCTIONS IN: oxidoreductase activity, copper ion binding; INVOLVED IN: oxidation reduction; LOCATED IN: thylak…
'8.1.1.1'	'TCA / org transformation.TCA.pyruvate DH.E1'	HORVU1Hr1G023630,1	-11.1079	0	'(loc_os03g44300.1 : 613.0) no description available & (at1g30120 : 569.0) Encodes a putative plastid pyruvate dehydrogenase E1 beta subunit that is distinct from the mitochondrial pyruvate dehydrogenase E1 beta subunit.; pyruvate dehydrogenase E1 beta (PDH-E1 BETA); FUNCTIONS IN: pyruvate dehydrogenase (acetyl-transferring) activity; INVOLVED IN: fatty acid biosynthetic process; LOCATED IN: plas…
'8.1.1.1'	'TCA / org transformation.TCA.pyruvate DH.E1'	HORVU2Hr1G070090,2	-11.6092	0	'(loc_os03g44300.1 : 647.0) no description available & (at1g30120 : 595.0) Encodes a putative plastid pyruvate dehydrogenase E1 beta subunit that is distinct from the mitochondrial pyruvate dehydrogenase E1 beta subunit.; pyruvate dehydrogenase E1 beta (PDH-E1 BETA); FUNCTIONS IN: pyruvate dehydrogenase (acetyl-transferring) activity; INVOLVED IN: fatty acid biosynthetic process; LOCATED IN: plas…
'8.1.1.1'	'TCA / org transformation.TCA.pyruvate DH.E1'	HORVU3Hr1G040360,1	-12.129	0	'(loc_os03g44300.1 : 613.0) no description available & (at1g30120 : 569.0) Encodes a putative plastid pyruvate dehydrogenase E1 beta subunit that is distinct from the mitochondrial pyruvate dehydrogenase E1 beta subunit.; pyruvate dehydrogenase E1 beta (PDH-E1 BETA); FUNCTIONS IN: pyruvate dehydrogenase (acetyl-transferring) activity; INVOLVED IN: fatty acid biosynthetic process; LOCATED IN: plas…
'8.1.1.1'	'TCA / org transformation.TCA.pyruvate DH.E1'	HORVU3Hr1G058460,5	-11.6303	0	'(loc_os03g44300.1 : 647.0) no description available & (at1g30120 : 595.0) Encodes a putative plastid pyruvate dehydrogenase E1 beta subunit that is distinct from the mitochondrial pyruvate dehydrogenase E1 beta subunit.; pyruvate dehydrogenase E1 beta (PDH-E1 BETA); FUNCTIONS IN: pyruvate dehydrogenase (acetyl-transferring) activity; INVOLVED IN: fatty acid biosynthetic process; LOCATED IN: plas…
'8.1.1.1'	'TCA / org transformation.TCA.pyruvate DH.E1'	HORVU3Hr1G059060,10	-10.6768	1.26792e-171	'(loc_os03g44300.1 : 613.0) no description available & (at1g30120 : 569.0) Encodes a putative plastid pyruvate dehydrogenase E1 beta subunit that is distinct from the mitochondrial pyruvate dehydrogenase E1 beta subunit.; pyruvate dehydrogenase E1 beta (PDH-E1 BETA); FUNCTIONS IN: pyruvate dehydrogenase (acetyl-transferring) activity; INVOLVED IN: fatty acid biosynthetic process; LOCATED IN: plas…
'8.1.1.1'	'TCA / org transformation.TCA.pyruvate DH.E1'	HORVU3Hr1G059060,11	-13.2457	0	'(loc_os03g44300.1 : 613.0) no description available & (at1g30120 : 569.0) Encodes a putative plastid pyruvate dehydrogenase E1 beta subunit that is distinct from the mitochondrial pyruvate dehydrogenase E1 beta subunit.; pyruvate dehydrogenase E1 beta (PDH-E1 BETA); FUNCTIONS IN: pyruvate dehydrogenase (acetyl-transferring) activity; INVOLVED IN: fatty acid biosynthetic process; LOCATED IN: plas…
'8.1.1.1'	'TCA / org transformation.TCA.pyruvate DH.E1'	HORVU5Hr1G077200,3	-9.66711	6.78242e-200	'(loc_os08g42410.2 : 610.0) no description available & (at5g50850 : 563.0) MACCI-BOU (MAB1); FUNCTIONS IN: pyruvate dehydrogenase (acetyl-transferring) activity, catalytic activity; INVOLVED IN: defense response to bacterium; LOCATED IN: mitochondrion, nucleolus, plasma membrane; EXPRESSED IN: 25 plant structures; EXPRESSED DURING: 17 growth stages; CONTAINS InterPro DOMAIN/s: Transketolase, C-te…
'8.1.1.1'	'TCA / org transformation.TCA.pyruvate DH.E1'	HORVU5Hr1G092920,9	-10.6027	0	'(loc_os03g44300.1 : 647.0) no description available & (at1g30120 : 595.0) Encodes a putative plastid pyruvate dehydrogenase E1 beta subunit that is distinct from the mitochondrial pyruvate dehydrogenase E1 beta subunit.; pyruvate dehydrogenase E1 beta (PDH-E1 BETA); FUNCTIONS IN: pyruvate dehydrogenase (acetyl-transferring) activity; INVOLVED IN: fatty acid biosynthetic process; LOCATED IN: plas…
'8.1.1.1'	'TCA / org transformation.TCA.pyruvate DH.E1'	HORVU6Hr1G003770,12	-10.2784	0	'(loc_os03g44300.1 : 613.0) no description available & (at1g30120 : 569.0) Encodes a putative plastid pyruvate dehydrogenase E1 beta subunit that is distinct from the mitochondrial pyruvate dehydrogenase E1 beta subunit.; pyruvate dehydrogenase E1 beta (PDH-E1 BETA); FUNCTIONS IN: pyruvate dehydrogenase (acetyl-transferring) activity; INVOLVED IN: fatty acid biosynthetic process; LOCATED IN: plas…
'8.1.2'	'TCA / org transformation.TCA.CS'	HORVU6Hr1G033980,8	-9.85175	1.21968e-172	'(loc_os11g33240.2 : 799.0) no description available & (at2g44350 : 721.0) encodes a mitochrondrion targeted citrate synthase, the first enzyme of the tricarboxylic acid cycle, catalyzing the condensation of acetyl-CoA and oxaloacetate, finally yielding citrate and CoA.; ATCS; FUNCTIONS IN: citrate (SI)-synthase activity, zinc ion binding, ATP binding; INVOLVED IN: response to cadmium ion, tricar…
'8.1.3'	'TCA / org transformation.TCA.aconitase'	HORVU4Hr1G080640,7	-10.1861	0	'(loc_os03g04410.1 : 647.0) no description available & (q6yzx6|acoc_orysa : 607.0) Putative aconitate hydratase, cytoplasmic (EC 4.2.1.3) (Citrate hydro-lyase) (Aconitase) - Oryza sativa (Rice) & (at2g05710 : 590.0) Encodes an aconitase that can catalyze the conversion of citrate to isocitrate through a cis-aconitate intermediate, indicating that it may participate in the TCA cycle and other prim…
'8.2.10'	'TCA / org transformation.other organic acid transformatons.malic'	HORVU3Hr1G068600,30	-9.60733	5.5804e-28	'(loc_os01g52500.3 : 981.0) no description available & (p51615|maox_vitvi : 897.0) NADP-dependent malic enzyme (EC 1.1.1.40) (NADP-ME) - Vitis vinifera (Grape) & (at5g11670 : 878.0) The malic enzyme (EC 1.1.1.40) encoded by AtNADP-ME2 is presumably a cytosolic enzyme involved in malate metabolism and possibly assisting the oxidative pentose phosphate pathway. AtNADP-ME2 counts for the major part …
'9.1.2'	'mitochondrial electron transport / ATP synthesis.NADH-DH.localisation not clear'	HORVU1Hr1G050740,4	-10.0028	4.39434e-86	'(loc_os10g42540.1 : 171.0) no description available & (at3g18410 : 145.0) Complex I subunit NDUFS6; FUNCTIONS IN: molecular_function unknown; INVOLVED IN: photorespiration; LOCATED IN: mitochondrion, mitochondrial membrane, mitochondrial respiratory chain complex I, respiratory chain complex I; CONTAINS InterPro DOMAIN/s: NADH-ubiquinone oxidoreductase, subunit 10 (InterPro:IPR019377), Complex I…
'9.1.2'	mitochondrial electron transport / ATP synthesis.NADH-DH.localisation not clear'	HORVU1Hr1G077910,3	-10.9248	0	'(loc_os05g43360.1 : 413.0) no description available & (at4g02580 : 361.0) NADH-ubiquinone oxidoreductase 24 kDa subunit, putative; FUNCTIONS IN: NADH dehydrogenase (ubiquinone) activity, zinc ion binding; INVOLVED IN: response to oxidative stress, mitochondrial electron transport, NADH to ubiquinone; LOCATED IN: mitochondrion, mitochondrial respiratory chain complex I, respiratory chain complex …
'9.1.2'	'mitochondrial electron transport / ATP synthesis.NADH-DH.localisation not clear'	HORVU2Hr1G051740,4	-11.7545	0	'(loc_os05g43360.1 : 241.0) no description available & (at4g02580 : 208.0) NADH-ubiquinone oxidoreductase 24 kDa subunit, putative; FUNCTIONS IN: NADH dehydrogenase (ubiquinone) activity, zinc ion binding; INVOLVED IN: response to oxidative stress, mitochondrial electron transport, NADH to ubiquinone; LOCATED IN: mitochondrion, mitochondrial respiratory chain complex I, respiratory chain complex …
'9.1.2'	'mitochondrial electron transport / ATP synthesis.NADH-DH.localisation not clear'	HORVU2Hr1G052880,2	-11.8819	0	'(loc_os05g43360.1 : 451.0) no description available & (at4g02580 : 394.0) NADH-ubiquinone oxidoreductase 24 kDa subunit, putative; FUNCTIONS IN: NADH dehydrogenase (ubiquinone) activity, zinc ion binding; INVOLVED IN: response to oxidative stress, mitochondrial electron transport, NADH to ubiquinone; LOCATED IN: mitochondrion, mitochondrial respiratory chain complex I, respiratory chain complex …
'9.1.2'	'mitochondrial electron transport / ATP synthesis.NADH-DH.localisation not clear'	HORVU5Hr1G123160,3	-9.62571	1.13993e-275	'(q851x7|derl2_orysa : 431.0) Derlin-2 (OsDerlin 2-1) - Oryza sativa (Rice) & (loc_os03g63520.1 : 431.0) no description available & (at4g04860 : 378.0) DERLIN-2.2 (DER2.2); CONTAINS InterPro DOMAIN/s: Der1-like (InterPro:IPR007599); BEST Arabidopsis thaliana protein match is: DERLIN-2.1 (TAIR:AT4G21810.1); Has 863 Blast hits to 862 proteins in 227 species: Archae - 0; Bacteria - 0; Metazoa - 343;…
'9.7'	'mitochondrial electron transport / ATP synthesis.cytochrome c oxidase'	HORVU7Hr1G020720,11	-9.7039	3.55898e-91	'(loc_os06g05080.1 : 162.0) no description available & (at3g15640 : 140.0) Rubredoxin-like superfamily protein; CONTAINS InterPro DOMAIN/s: Cytochrome c oxidase, subunit Vb (InterPro:IPR002124); BEST Arabidopsis thaliana protein match is: Rubredoxin-like superfamily protein (TAIR:AT1G80230.1); Has 464 Blast hits to 464 proteins in 159 species: Archae - 0; Bacteria - 0; Metazoa - 230; Fungi - 86; …
'10.1.1.1'	'cell wall.precursor synthesis.NDP sugar pyrophosphorylase.GDP mannose'	HORVU4Hr1G060380,3	-9.75656	1.11007e-53	'(loc_os03g16150.1 : 556.0) no description available & (at2g39770 : 520.0) Encodes a GDP-mannose pyrophosphorylase/ mannose-1-pyrophosphatase. This enzyme provides GDP-mannose, which is used for cell wall carbohydrate biosynthesis and protein glycosylation as well as for ascorbate (vitamin C) biosynthesis. Mutations in this gene confer hypersensitivity to NH4+.; CYTOKINESIS DEFECTIVE 1 (CYT1); CO…
'10.1.21'	'cell wall.precursor synthesis.phosphomannomutase'	HORVU2Hr1G122950,2	-10.5392	3.01992e-229	'(loc_os04g58580.1 : 457.0) no description available & (at2g45790 : 416.0) encodes a phosphomannomutase, involved in ascorbate biosynthesis; phosphomannomutase (PMM); FUNCTIONS IN: protein binding, phosphomannomutase activity; INVOLVED IN: L-ascorbic acid biosynthetic process, response to salt stress, mannose biosynthetic process; LOCATED IN: cytoplasm; EXPRESSED IN: 24 plant structures; EXPRESSE…
'10.1.21'	'cell wall.precursor synthesis.phosphomannomutase'	HORVU4Hr1G026720,4	-10.8305	7.2635e-218	'(loc_os04g58580.1 : 435.0) no description available & (at2g45790 : 393.0) encodes a phosphomannomutase, involved in ascorbate biosynthesis; phosphomannomutase (PMM); FUNCTIONS IN: protein binding, phosphomannomutase activity; INVOLVED IN: L-ascorbic acid biosynthetic process, response to salt stress, mannose biosynthetic process; LOCATED IN: cytoplasm; EXPRESSED IN: 24 plant structures; EXPRESSE…
'10.1.21'	'cell wall.precursor synthesis.phosphomannomutase'	HORVU5Hr1G096370,5	-11.5048	0	'(loc_os04g58580.2 : 164.0) no description available & (at2g45790 : 149.0) encodes a phosphomannomutase, involved in ascorbate biosynthesis; phosphomannomutase (PMM); FUNCTIONS IN: protein binding, phosphomannomutase activity; INVOLVED IN: L-ascorbic acid biosynthetic process, response to salt stress, mannose biosynthetic process; LOCATED IN: cytoplasm; EXPRESSED IN: 24 plant structures; EXPRESSE…
'10.1.4'	'cell wall.precursor synthesis.UDP-Glc dehydrogenase (UGD)'	HORVU7Hr1G093680,1	-10.9665	0	'(loc_os12g25690.1 : 924.0) no description available & (q96558|ugdh_soybn : 885.0) UDP-glucose 6-dehydrogenase (EC 1.1.1.22) (UDP-Glc dehydrogenase) (UDP-GlcDH) (UDPGDH) - Glycine max (Soybean) & (at5g15490 : 880.0) UDP-glucose 6-dehydrogenase family protein; FUNCTIONS IN: in 7 functions; INVOLVED IN: oxidation reduction, metabolic process; LOCATED IN: cytosol, cell wall, nucleus; EXPRESSED IN: 2…
'10.5.3'	'cell wall.cell wall proteins.LRR'	HORVU1Hr1G026650,4	-10.1137	4.69708e-211	'(loc_os05g08770.1 : 577.0) no description available & (at4g13340 : 449.0) Leucine-rich repeat (LRR) family protein; FUNCTIONS IN: structural constituent of cell wall; LOCATED IN: cell wall, plant-type cell wall; EXPRESSED IN: 23 plant structures; EXPRESSED DURING: 13 growth stages; CONTAINS InterPro DOMAIN/s: Leucine-rich repeat-containing N-terminal domain, type 2 (InterPro:IPR013210); BEST Ara…
'10.6.2'	'cell wall.degradation.mannan-xylose-arabinose-fucose'	HORVU2Hr1G091270,5	-9.62022	7.2569e-97	'(loc_os04g44840.1 : 1039.0) no description available & (at5g10560 : 710.0) Glycosyl hydrolase family protein; FUNCTIONS IN: xylan 1,4-beta-xylosidase activity, hydrolase activity, hydrolyzing O-glycosyl compounds; INVOLVED IN: carbohydrate metabolic process; LOCATED IN: plasma membrane, vacuole; EXPRESSED IN: 24 plant structures; EXPRESSED DURING: 13 growth stages; CONTAINS InterPro DOMAIN/s: Gl…
'11.1.1.1'	'lipid metabolism.FA synthesis and FA elongation.Acetyl CoA Carboxylation.homomeric Enzyme'	HORVU0Hr1G009740,10	-10.9758	0	'(loc_os05g22940.1 : 1560.0) no description available & (at1g36160 : 1161.0) Encodes acetyl-CoA carboxylase. Mutant displays uncoordinated cell divisions which are enhanced by cytokinins. Mutant also has aberrant organization of the apical region in the embryo and abnormal root and shoot development. Essential for very long chain fatty acid elongation.; acetyl-CoA carboxylase 1 (ACC1); CONTAINS I…
'11.1.1.1'	'lipid metabolism.FA synthesis and FA elongation.Acetyl CoA Carboxylation.homomeric Enzyme'	HORVU1Hr1G024240,10	-10.5999	8.61302e-142	'(loc_os05g22940.1 : 2580.0) no description available & (at1g36160 : 2021.0) Encodes acetyl-CoA carboxylase. Mutant displays uncoordinated cell divisions which are enhanced by cytokinins. Mutant also has aberrant organization of the apical region in the embryo and abnormal root and shoot development. Essential for very long chain fatty acid elongation.; acetyl-CoA carboxylase 1 (ACC1); CONTAINS I…
'11.1.1.1'	'lipid metabolism.FA synthesis and FA elongation.Acetyl CoA Carboxylation.homomeric Enzyme'	HORVU2Hr1G010440,5	-10.2981	0	'(loc_os05g22940.1 : 1560.0) no description available & (at1g36160 : 1161.0) Encodes acetyl-CoA carboxylase. Mutant displays uncoordinated cell divisions which are enhanced by cytokinins. Mutant also has aberrant organization of the apical region in the embryo and abnormal root and shoot development. Essential for very long chain fatty acid elongation.; acetyl-CoA carboxylase 1 (ACC1); CONTAINS I…
'11.1.1.1'	'lipid metabolism.FA synthesis and FA elongation.Acetyl CoA Carboxylation.homomeric Enzyme'	HORVU2Hr1G068670,6	-10.2396	1.37503e-235	'(loc_os05g22940.1 : 2133.0) no description available & (at1g36160 : 1632.0) Encodes acetyl-CoA carboxylase. Mutant displays uncoordinated cell divisions which are enhanced by cytokinins. Mutant also has aberrant organization of the apical region in the embryo and abnormal root and shoot development. Essential for very long chain fatty acid elongation.; acetyl-CoA carboxylase 1 (ACC1); CONTAINS I…
'11.1.1.1'	'lipid metabolism.FA synthesis and FA elongation.Acetyl CoA Carboxylation.homomeric Enzyme'	HORVU3Hr1G024530,7	-11.4099	0	'(loc_os05g22940.1 : 3291.0) no description available & (at1g36160 : 2639.0) Encodes acetyl-CoA carboxylase. Mutant displays uncoordinated cell divisions which are enhanced by cytokinins. Mutant also has aberrant organization of the apical region in the embryo and abnormal root and shoot development. Essential for very long chain fatty acid elongation.; acetyl-CoA carboxylase 1 (ACC1); CONTAINS I…
'11.1.1.1'	'lipid metabolism.FA synthesis and FA elongation.Acetyl CoA Carboxylation.homomeric Enzyme'	HORVU3Hr1G059140,20	-10.5118	0	'(loc_os05g22940.1 : 1969.0) no description available & (at1g36160 : 1494.0) Encodes acetyl-CoA carboxylase. Mutant displays uncoordinated cell divisions which are enhanced by cytokinins. Mutant also has aberrant organization of the apical region in the embryo and abnormal root and shoot development. Essential for very long chain fatty acid elongation.; acetyl-CoA carboxylase 1 (ACC1); CONTAINS I…
'11.1.1.1'	'lipid metabolism.FA synthesis and FA elongation.Acetyl CoA Carboxylation.homomeric Enzyme'	HORVU5Hr1G092920,17	-10.1687	5.10238e-246	'(loc_os05g22940.1 : 3333.0) no description available & (at1g36180 : 2640.0) acetyl-CoA carboxylase 2 (ACC2); acetyl-CoA carboxylase 2 (ACC2); FUNCTIONS IN: acetyl-CoA carboxylase activity; INVOLVED IN: metabolic process; LOCATED IN: chloroplast; EXPRESSED IN: 14 plant structures; EXPRESSED DURING: 7 growth stages; CONTAINS InterPro DOMAIN/s: Carbamoyl phosphate synthase, large subunit, N-termina…
'11.1.1.1'	'lipid metabolism.FA synthesis and FA elongation.Acetyl CoA Carboxylation.homomeric Enzyme'	HORVU6Hr1G024100,5	-10.2703	3.12226e-234	'(loc_os05g22940.1 : 1695.0) no description available & (at1g36160 : 1270.0) Encodes acetyl-CoA carboxylase. Mutant displays uncoordinated cell divisions which are enhanced by cytokinins. Mutant also has aberrant organization of the apical region in the embryo and abnormal root and shoot development. Essential for very long chain fatty acid elongation.; acetyl-CoA carboxylase 1 (ACC1); CONTAINS I…
'11.1.1.1'	'lipid metabolism.FA synthesis and FA elongation.Acetyl CoA Carboxylation.homomeric Enzyme'	HORVU6Hr1G052420,12	-10.2726	1.63172e-78	'(loc_os05g22940.1 : 2133.0) no description available & (at1g36160 : 1632.0) Encodes acetyl-CoA carboxylase. Mutant displays uncoordinated cell divisions which are enhanced by cytokinins. Mutant also has aberrant organization of the apical region in the embryo and abnormal root and shoot development. Essential for very long chain fatty acid elongation.; acetyl-CoA carboxylase 1 (ACC1); CONTAINS I…
'11.3.3'	'lipid metabolism.Phospholipid synthesis.phosphatidate cytidylyltransferase'	HORVU6Hr1G014790,4	-9.57365	0	'(loc_os02g03460.1 : 371.0) no description available & (at2g45150 : 311.0) cytidinediphosphate diacylglycerol synthase 4; CONTAINS InterPro DOMAIN/s: Phosphatidate cytidylyltransferase (InterPro:IPR000374); BEST Arabidopsis thaliana protein match is: cytidinediphosphate diacylglycerol synthase 5 (TAIR:AT3G60620.1); Has 35333 Blast hits to 34131 proteins in 2444 species: Archae - 798; Bacteria - 2…
'11.6'	'lipid metabolism.lipid transfer proteins etc'	HORVU5Hr1G109040,3	-9.84235	2.22114e-83	'(loc_os03g58940.1 : 187.0) no description available & (at2g44300 : 122.0) Bifunctional inhibitor/lipid-transfer protein/seed storage 2S albumin superfamily protein; FUNCTIONS IN: lipid binding; INVOLVED IN: lipid transport; LOCATED IN: plasma membrane, anchored to membrane; EXPRESSED IN: 21 plant structures; EXPRESSED DURING: 13 growth stages; CONTAINS InterPro DOMAIN/s: Bifunctional inhibitor/p…
'11.8.1.3'	'lipid metabolism.''exotics'' (steroids, squalene etc).sphingolipids.ceramide glucosyltransferase'	HORVU5Hr1G035030,1	-10.0875	1.60287e-123	'(at2g19880 : 89.4) Nucleotide-diphospho-sugar transferases superfamily protein; FUNCTIONS IN: ceramide glucosyltransferase activity; INVOLVED IN: biological_process unknown; LOCATED IN: endomembrane system; EXPRESSED IN: 24 plant structures; EXPRESSED DURING: 15 growth stages; CONTAINS InterPro DOMAIN/s: Glycosyl transferase, family 2 (InterPro:IPR001173). & (loc_os01g67870.1 : 86.3) no descript…
'11.8.6'	'lipid metabolism.'exotics' (steroids, squalene etc).cycloartenol synthase'	HORVU6Hr1G019840,15	-9.62571	1.4875e-43	'(loc_os02g04710.1 : 1333.0) no description available & (at2g07050 : 1181.0) Involved in the biosynthesis of brassinosteroids. Catalyzes the reaction from epoxysqualene to cycloartenol.; cycloartenol synthase 1 (CAS1); FUNCTIONS IN: cycloartenol synthase activity; INVOLVED IN: pentacyclic triterpenoid biosynthetic process, thylakoid membrane organization, pollen development; LOCATED IN: vacuole; …
'11.9.3'	'lipid metabolism.lipid degradation.lysophospholipases'	HORVU2Hr1G061710,9	-9.76321	5.4065e-86	'(loc_os07g03160.1 : 1171.0) no description available & (at3g18860 : 866.0) transducin family protein / WD-40 repeat family protein; CONTAINS InterPro DOMAIN/s: WD40 repeat 2 (InterPro:IPR019782), PLAA family ubiquitin binding, PFU (InterPro:IPR015155), WD40 repeat, conserved site (InterPro:IPR019775), WD40 repeat (InterPro:IPR001680), G-protein beta WD-40 repeat, region (InterPro:IPR020472), WD4…
'12.2.2'	'N-metabolism.ammonia metabolism.glutamine synthetase'	HORVU2Hr1G111300,16	-10.4367	1.11419e-269	'(p13564|glna2_horvu : 308.0) Glutamine synthetase leaf isozyme, chloroplast precursor (EC 6.3.1.2) (Glutamate--ammonia ligase) (Chloroplast GS2) - Hordeum vulgare (Barley) & (loc_os04g56400.4 : 294.0) no description available & (at5g35630 : 269.0) chloroplastic glutamine synthetase; glutamine synthetase 2 (GS2); FUNCTIONS IN: glutamate-ammonia ligase activity; INVOLVED IN: in 8 processes; LOCATE…
'13'	'amino acid metabolism'	HORVU5Hr1G042310,4	-10.0182	1.91711e-67	'(loc_os12g05650.1 : 400.0) no description available & (at5g04740 : 313.0) ACT domain-containing protein; FUNCTIONS IN: amino acid binding; INVOLVED IN: metabolic process; LOCATED IN: chloroplast thylakoid membrane; EXPRESSED IN: 22 plant structures; EXPRESSED DURING: 13 growth stages; CONTAINS InterPro DOMAIN/s: Amino acid-binding ACT (InterPro:IPR002912); BEST Arabidopsis thaliana protein match…
'13.1.1.2.1'	'amino acid metabolism.synthesis.central amino acid metabolism.aspartate.aspartate aminotransferase'	HORVU1Hr1G090490,11	-10.7406	0	'(loc_os02g14110.1 : 724.0) no description available & (at2g30970 : 641.0) ASPARTATE AMINOTRANSFERASE 1; aspartate aminotransferase 1 (ASP1); FUNCTIONS IN: L-aspartate:2-oxoglutarate aminotransferase activity, copper ion binding; LOCATED IN: mitochondrion; EXPRESSED IN: 23 plant structures; EXPRESSED DURING: 13 growth stages; CONTAINS InterPro DOMAIN/s: Aminotransferase, class I/classII (InterPro…
'13.1.1.2.1'	'amino acid metabolism.synthesis.central amino acid metabolism.aspartate.aspartate aminotransferase'	HORVU5Hr1G012780,7	-11.7993	0	'(loc_os02g14110.1 : 724.0) no description available & (at2g30970 : 641.0) ASPARTATE AMINOTRANSFERASE 1; aspartate aminotransferase 1 (ASP1); FUNCTIONS IN: L-aspartate:2-oxoglutarate aminotransferase activity, copper ion binding; LOCATED IN: mitochondrion; EXPRESSED IN: 23 plant structures; EXPRESSED DURING: 13 growth stages; CONTAINS InterPro DOMAIN/s: Aminotransferase, class I/classII (InterPro…
'13.1.1.2.1'	'amino acid metabolism.synthesis.central amino acid metabolism.aspartate.aspartate aminotransferase'	HORVU6Hr1G003470,4	-11.0728	0	'(loc_os02g14110.1 : 794.0) no description available & (at2g30970 : 701.0) ASPARTATE AMINOTRANSFERASE 1; aspartate aminotransferase 1 (ASP1); FUNCTIONS IN: L-aspartate:2-oxoglutarate aminotransferase activity, copper ion binding; LOCATED IN: mitochondrion; EXPRESSED IN: 23 plant structures; EXPRESSED DURING: 13 growth stages; CONTAINS InterPro DOMAIN/s: Aminotransferase, class I/classII (InterPro…
'13.1.1.2.1'	'amino acid metabolism.synthesis.central amino acid metabolism.aspartate.aspartate aminotransferase'	HORVU6Hr1G091130,8	-12.517	0	'(loc_os02g14110.1 : 725.0) no description available & (at2g30970 : 643.0) ASPARTATE AMINOTRANSFERASE 1; aspartate aminotransferase 1 (ASP1); FUNCTIONS IN: L-aspartate:2-oxoglutarate aminotransferase activity, copper ion binding; LOCATED IN: mitochondrion; EXPRESSED IN: 23 plant structures; EXPRESSED DURING: 13 growth stages; CONTAINS InterPro DOMAIN/s: Aminotransferase, class I/classII (InterPro…
'13.1.1.3.1'	'amino acid metabolism.synthesis.central amino acid metabolism.alanine.alanine aminotransferase'	HORVU1Hr1G018540,8	-9.60548	7.34026e-100	'(p52894|ala2_horvu : 721.0) Alanine aminotransferase 2 (EC 2.6.1.2) (GPT) (Glutamic--pyruvic transaminase 2) (Glutamic--alanine transaminase 2) (ALAAT-2) - Hordeum vulgare (Barley) & (loc_os10g25130.1 : 655.0) no description available & (at1g17290 : 602.0) Encodes for alanine aminotransferase (ALAAT1), involved in alanine catabolism during plants recovery from hypoxia; alanine aminotransferas (A…
'13.1.3.6.1.1'	'amino acid metabolism.synthesis.aspartate family.misc.homoserine.aspartate kinase'	HORVU5Hr1G053950,15	-9.85953	2.63074e-72	'(loc_os09g12290.1 : 1596.0) no description available & (p49080|akh2_maize : 1542.0) Bifunctional aspartokinase/homoserine dehydrogenase 2, chloroplast precursor (AK-HD 2) (AK-HSDH 2) [Includes: Aspartokinase (EC 2.7.2.4); Homoserine dehydrogenase (EC 1.1.1.3)] - Zea mays (Maize) & (at1g31230 : 1282.0) Encodes a bifunctional aspartate kinase/homoserine dehydrogenase. These two activities catalyze…
'13.1.4.5.1'	'amino acid metabolism.synthesis.branched chain group.isoleucine specific.threonine ammonia-lyase'	HORVU4Hr1G007890,9	-10.0098	0	'(loc_os03g50510.1 : 867.0) no description available & (at3g10050 : 717.0) first enzyme in the biosynthetic pathway of isoleucine; L-O-methylthreonine resistant 1 (OMR1); FUNCTIONS IN: L-threonine ammonia-lyase activity; INVOLVED IN: isoleucine biosynthetic process, threonine metabolic process; LOCATED IN: chloroplast; EXPRESSED IN: 22 plant structures; EXPRESSED DURING: 13 growth stages; CONTAIN…
'13.1.6.1.5'	'amino acid metabolism.synthesis.aromatic aa.chorismate.shikimate kinase'	HORVU7Hr1G007940,10	-9.81858	2.3759e-166	'(at2g16790 : 157.0) P-loop containing nucleoside triphosphate hydrolases superfamily protein; FUNCTIONS IN: shikimate kinase activity, kinase activity, ATP binding; INVOLVED IN: carbohydrate metabolic process; LOCATED IN: cellular_component unknown; EXPRESSED IN: 10 plant structures; EXPRESSED DURING: LP.04 four leaves visible, 4 anthesis, petal differentiation and expansion stage; CONTAINS Inte…
'13.1.6.5.5'	'amino acid metabolism.synthesis.aromatic aa.tryptophan.tryptophan synthase'	HORVU1Hr1G093480,5	-9.81218	3.34382e-135	'(loc_os07g08430.1 : 256.0) no description available & (at4g02610 : 216.0) Aldolase-type TIM barrel family protein; CONTAINS InterPro DOMAIN/s: Tryptophan synthase, alpha chain, active site (InterPro:IPR018204), Aldolase-type TIM barrel (InterPro:IPR013785), Ribulose-phosphate binding barrel (InterPro:IPR011060), Tryptophan synthase, alpha chain (InterPro:IPR002028); BEST Arabidopsis thaliana pro…
'13.2.2.3'	'amino acid metabolism.degradation.glutamate family.arginine'	HORVU5Hr1G092960,5	-9.98584	4.22034e-120	'(loc_os03g44150.1 : 811.0) no description available & (at5g46180 : 670.0) Encodes an ornithine delta-aminotransferase that is transcriptionally up-regulated in young seedlings and in response to salt stress. It is unlikely to play a role in salt-stress-induced proline accumulation, however, it appears to participate in arginine and ornithine catabolism.; ornithine-delta-aminotransferase (DELTA-O…
'13.2.3.5.1'	'mino acid metabolism.degradation.aspartate family.lysine.lysine decarboxylase'	HORVU1Hr1G094290,2	-7.02	6.65812e-14	'(loc_os05g51390.1 : 239.0) no description available & (at3g53450 : 183.0) Putative lysine decarboxylase family protein; FUNCTIONS IN: molecular_function unknown; INVOLVED IN: lysine biosynthetic process via diaminopimelate; LOCATED IN: cytosol, nucleus; EXPRESSED IN: 15 plant structures; EXPRESSED DURING: 6 growth stages; CONTAINS InterPro DOMAIN/s: Conserved hypothetical protein CHP00730 (Inter…
'13.2.3.5.1'	'mino acid metabolism.degradation.aspartate family.lysine.lysine decarboxylase'	HORVU4Hr1G005660,6	-6.22882	0	'(loc_os03g49050.1 : 213.0) no description available & (at2g37210 : 167.0) Encodes a protein of unknown function. It has been crystallized and shown to be structurally almost identical to the protein encoded by At5g11950.; lysine decarboxylase family protein; FUNCTIONS IN: molecular_function unknown; INVOLVED IN: biological_process unknown; LOCATED IN: cytosol, nucleus; EXPRESSED IN: 9 plant stru…
'13.2.4.3'	'amino acid metabolism.degradation.branched chain group.valine'	HORVU2Hr1G107550,4	-10.2119	2.24402e-151	'(loc_os07g09060.1 : 917.0) no description available & (at2g14170 : 736.0) Arabidopsis thaliana methylmalonate-semialdehyde dehydrogenase; aldehyde dehydrogenase 6B2 (ALDH6B2); CONTAINS InterPro DOMAIN/s: Aldehyde/histidinol dehydrogenase (InterPro:IPR016161), Aldehyde dehydrogenase (InterPro:IPR015590), Aldehyde dehydrogenase, N-terminal (InterPro:IPR016162), Aldehyde dehydrogenase, conserved si…
'13.2.6.3'	'amino acid metabolism.degradation.aromatic aa.tryptophan'	HORVU1Hr1G049960,22	-9.76155	0	'(loc_os12g16350.9 : 531.0) no description available & (at5g65940 : 430.0) hydrolyzes beta-hydroxyisobutyryl-CoA; beta-hydroxyisobutyryl-CoA hydrolase 1 (CHY1); CONTAINS InterPro DOMAIN/s: Crotonase, core (InterPro:IPR001753); BEST Arabidopsis thaliana protein match is: ATP-dependent caseinolytic (Clp) protease/crotonase family protein (TAIR:AT2G30660.1); Has 31609 Blast hits to 31599 proteins in…
'15.3'	'metal handling.regulation'	HORVU4Hr1G073630,3	-10.8826	1.7098e-88	'(q58fk4|ard2_orysa : 390.0) 1,2-dihydroxy-3-keto-5-methylthiopentene dioxygenase 2 (EC 1.13.-.-) (Aci-reductone dioxygenase 2) (Submergence-induced protein 2A) - Oryza sativa (Rice) & (loc_os03g06620.1 : 390.0) no description available & (at4g14710 : 337.0) ATARD2; FUNCTIONS IN: acireductone dioxygenase [iron(II)-requiring] activity, metal ion binding; INVOLVED IN: oxidation reduction, L-methion…
'16.1.4'	'secondary metabolism.isoprenoids.carotenoids'	HORVU5Hr1G002180,7	-9.82655	0	'(loc_os12g43590.1 : 322.0) no description available & (at5g49555 : 249.0) FAD/NAD(P)-binding oxidoreductase family protein; CONTAINS InterPro DOMAIN/s: FAD dependent oxidoreductase (InterPro:IPR006076); BEST Arabidopsis thaliana protein match is: carotenoid isomerase (TAIR:AT1G06820.1); Has 30201 Blast hits to 17322 proteins in 780 species: Archae - 12; Bacteria - 1396; Metazoa - 17338; Fungi - …
'16.1.4.1'	'secondary metabolism.isoprenoids.carotenoids.phytoene synthase'	HORVU2Hr1G080970,14	-11.151	0	'(loc_os06g51290.3 : 382.0) no description available & (p49085|psy_maize : 372.0) Phytoene synthase, chloroplast precursor (EC 2.5.1.-) - Zea mays (Maize) & (at5g17230 : 340.0) Encodes phytoene synthase.; PHYTOENE SYNTHASE (PSY); CONTAINS InterPro DOMAIN/s: Squalene/phytoene synthase, conserved site (InterPro:IPR019845), Terpenoid synthase (InterPro:IPR008949), Squalene/phytoene synthase (InterPr…
'16.1.4.1'	'secondary metabolism.isoprenoids.carotenoids.phytoene synthase'	HORVU7Hr1G120660,16	-10.6046	0	'(loc_os06g51290.3 : 600.0) no description available & (p49085|psy_maize : 561.0) Phytoene synthase, chloroplast precursor (EC 2.5.1.-) - Zea mays (Maize) & (at5g17230 : 497.0) Encodes phytoene synthase.; PHYTOENE SYNTHASE (PSY); CONTAINS InterPro DOMAIN/s: Squalene/phytoene synthase, conserved site (InterPro:IPR019845), Terpenoid synthase (InterPro:IPR008949), Squalene/phytoene synthase (InterPr…
'16.2'	'secondary metabolism.phenylpropanoids'	HORVU5Hr1G073960,12	-9.68475	1.41363e-90	'(loc_os09g31490.1 : 192.0) no description available & (at1g76470 : 157.0) NAD(P)-binding Rossmann-fold superfamily protein; FUNCTIONS IN: coenzyme binding, binding, cinnamoyl-CoA reductase activity, catalytic activity; INVOLVED IN: lignin biosynthetic process, cellular metabolic process, metabolic process; LOCATED IN: endomembrane system; EXPRESSED IN: leaf whorl, sepal, male gametophyte, flower…
'17.2.2'	'hormone metabolism.auxin.signal transduction'	HORVU1Hr1G057860,12	-6.70044	0	'(loc_os02g07120.1 : 1097.0) no description available & (at2g02560 : 901.0) Arabidopsis thaliana homolog of human CAND1 (cullin-associated and neddylation-dissociated). Putative similarity to TBP-interacting protein TIP120. Ubiquitously expressed in plant tissues throughout development. T-DNA insertion mutant plants were completely sterile and resistant to sirtinol and auxin, but not to gibberell…
'17.2.2'	'hormone metabolism.auxin.signal transduction'	HORVU2Hr1G005650,20	-11.8868	0	'(loc_os02g07120.1 : 1394.0) no description available & (at2g02560 : 1168.0) Arabidopsis thaliana homolog of human CAND1 (cullin-associated and neddylation-dissociated). Putative similarity to TBP-interacting protein TIP120. Ubiquitously expressed in plant tissues throughout development. T-DNA insertion mutant plants were completely sterile and resistant to sirtinol and auxin, but not to gibberel…
'17.2.2'	'hormone metabolism.auxin.signal transduction'	HORVU3Hr1G026020,4	-10.7177	0	'(loc_os02g07120.1 : 1390.0) no description available & (at2g02560 : 1163.0) Arabidopsis thaliana homolog of human CAND1 (cullin-associated and neddylation-dissociated). Putative similarity to TBP-interacting protein TIP120. Ubiquitously expressed in plant tissues throughout development. T-DNA insertion mutant plants were completely sterile and resistant to sirtinol and auxin, but not to gibberel…
'17.2.2'	'hormone metabolism.auxin.signal transduction'	HORVU5Hr1G093700,19	-13.895	0	'(loc_os02g07120.1 : 831.0) no description available & (at2g02560 : 681.0) Arabidopsis thaliana homolog of human CAND1 (cullin-associated and neddylation-dissociated). Putative similarity to TBP-interacting protein TIP120. Ubiquitously expressed in plant tissues throughout development. T-DNA insertion mutant plants were completely sterile and resistant to sirtinol and auxin, but not to gibberelli…
'17.2.2'	'hormone metabolism.auxin.signal transduction'	HORVU6Hr1G079140,10	-11.2258	0	'(loc_os02g07120.1 : 831.0) no description available & (at2g02560 : 681.0) Arabidopsis thaliana homolog of human CAND1 (cullin-associated and neddylation-dissociated). Putative similarity to TBP-interacting protein TIP120. Ubiquitously expressed in plant tissues throughout development. T-DNA insertion mutant plants were completely sterile and resistant to sirtinol and auxin, but not to gibberelli…
'17.2.2'	'hormone metabolism.auxin.signal transduction'	HORVU7Hr1G012940,5	-10.2621	5.7572e-133	'(loc_os02g07120.1 : 1195.0) no description available & (at2g02560 : 981.0) Arabidopsis thaliana homolog of human CAND1 (cullin-associated and neddylation-dissociated). Putative similarity to TBP-interacting protein TIP120. Ubiquitously expressed in plant tissues throughout development. T-DNA insertion mutant plants were completely sterile and resistant to sirtinol and auxin, but not to gibberell…
'17.2.2'	'hormone metabolism.auxin.signal transduction'	HORVU7Hr1G028840,13	-10.6978	2.1888e-199	'(loc_os02g07120.1 : 1028.0) no description available & (at2g02560 : 846.0) Arabidopsis thaliana homolog of human CAND1 (cullin-associated and neddylation-dissociated). Putative similarity to TBP-interacting protein TIP120. Ubiquitously expressed in plant tissues throughout development. T-DNA insertion mutant plants were completely sterile and resistant to sirtinol and auxin, but not to gibberell…
'17.2.2'	'hormone metabolism.auxin.signal transduction'	HORVU7Hr1G100850,3	-11.4424	0	'(loc_os02g07120.1 : 1028.0) no description available & (at2g02560 : 846.0) Arabidopsis thaliana homolog of human CAND1 (cullin-associated and neddylation-dissociated). Putative similarity to TBP-interacting protein TIP120. Ubiquitously expressed in plant tissues throughout development. T-DNA insertion mutant plants were completely sterile and resistant to sirtinol and auxin, but not to gibberell…
'17.2.2'	'hormone metabolism.auxin.signal transduction'	HORVU3Hr1G075920,2	-4.70044	0.000255552	'(loc_os02g07120.1 : 903.0) no description available & (at2g02560 : 738.0) Arabidopsis thaliana homolog of human CAND1 (cullin-associated and neddylation-dissociated). Putative similarity to TBP-interacting protein TIP120. Ubiquitously expressed in plant tissues throughout development. T-DNA insertion mutant plants were completely sterile and resistant to sirtinol and auxin, but not to gibberelli…
'17.2.2'	'hormone metabolism.auxin.signal transduction'	HORVU5Hr1G055220,2	-4.16993	1.89243e-227	'(loc_os02g07120.1 : 2008.0) no description available & (at2g02560 : 1676.0) Arabidopsis thaliana homolog of human CAND1 (cullin-associated and neddylation-dissociated). Putative similarity to TBP-interacting protein TIP120. Ubiquitously expressed in plant tissues throughout development. T-DNA insertion mutant plants were completely sterile and resistant to sirtinol and auxin, but not to gibberel…
'17.2.3'	'hormone metabolism.auxin.induced-regulated-responsive-activated'	HORVU3Hr1G083110,4	-9.88722	2.66752e-72	'(loc_os01g64780.4 : 248.0) no description available & (at1g43130 : 206.0) like COV 2 (LCV2); CONTAINS InterPro DOMAIN/s: Protein of unknown function DUF502 (InterPro:IPR007462); BEST Arabidopsis thaliana protein match is: Protein of unknown function (DUF502) (TAIR:AT2G20120.1); Has 2432 Blast hits to 2432 proteins in 576 species: Archae - 20; Bacteria - 1089; Metazoa - 1; Fungi - 0; Plants - 154…
'17.3.2.99'	'hormone metabolism.brassinosteroid.signal transduction.other'	HORVU2Hr1G080020,6	-9.56986	5.61218e-92	'(loc_os04g38480.1 : 808.0) no description available & (at1g71830 : 725.0) Plasma membrane LRR receptor-like serine threonine kinase expressed during embryogenesis in locules until stage 6 anthers, with higher expression in the tapetal cell layer. SERK1 and SERK2 receptor kinases function redundantly as an important control point for sporophytic development controlling male gametophyte production…
'17.4.1'	'hormone metabolism.cytokinin.synthesis-degradation'	HORVU2Hr1G062320,1	-4.16993	0.00288486	'(loc_os01g73760.1 : 171.0) no description available & (at2g27760 : 122.0) Encodes tRNA isopentenyltransferase, similar to yeast MOD5.; tRNAisopentenyltransferase 2 (IPT2); CONTAINS InterPro DOMAIN/s: tRNA delta(2)-isopentenylpyrophosphate transferase (InterPro:IPR018022), tRNA isopentenyltransferase (InterPro:IPR002627); BEST Arabidopsis thaliana protein match is: isopentenyltransferase 5 (TAIR:…
'17.4.1'	'hormone metabolism.cytokinin.synthesis-degradation'	HORVU2Hr1G062320,13	-5.58496	1.63841e-08	'(loc_os01g73760.1 : 171.0) no description available & (at2g27760 : 122.0) Encodes tRNA isopentenyltransferase, similar to yeast MOD5.; tRNAisopentenyltransferase 2 (IPT2); CONTAINS InterPro DOMAIN/s: tRNA delta(2)-isopentenylpyrophosphate transferase (InterPro:IPR018022), tRNA isopentenyltransferase (InterPro:IPR002627); BEST Arabidopsis thaliana protein match is: isopentenyltransferase 5 (TAIR:…
'17.4.1'	'hormone metabolism.cytokinin.synthesis-degradation'	HORVU3Hr1G105360,3	-5	5.84718e-07	'(loc_os01g71310.1 : 376.0) no description available & (at2g41510 : 256.0) It encodes a protein whose sequence is similar to cytokinin oxidase/dehydrogenase, which catalyzes the degradation of cytokinins.; cytokinin oxidase/dehydrogenase 1 (CKX1); FUNCTIONS IN: cytokinin dehydrogenase activity; INVOLVED IN: N-terminal protein myristoylation, cytokinin catabolic process, meristem development; LOCA…
'17.4.1'	'hormone metabolism.cytokinin.synthesis-degradation'	HORVU1Hr1G057860,12	-6.04439	6.32266e-11	'(loc_os05g31040.1 : 316.0) no description available & (at3g63440 : 236.0) This gene used to be called AtCKX7. It encodes a protein whose sequence is similar to cytokinin oxidase/dehydrogenase, which catalyzes the degradation of cytokinins.; cytokinin oxidase/dehydrogenase 6 (CKX6); CONTAINS InterPro DOMAIN/s: Cytokinin dehydrogenase 1, FAD/cytokinin binding domain (InterPro:IPR015345), FAD-bindi…
'17.4.1'	'hormone metabolism.cytokinin.synthesis-degradation'	HORVU5Hr1G055220,2	-1	0.0014998	'(loc_os03g24240.1 : 292.0) no description available & (at3g63110 : 203.0) Encodes cytokinin synthase involved in cytokinin biosynthesis. IPT3 subcellular localization is modulated by farnesylation- when farnesylated it is localized to the nucleus, otherwise to the chloroplast.; isopentenyltransferase 3 (IPT3); CONTAINS InterPro DOMAIN/s: tRNA isopentenyltransferase (InterPro:IPR002627); BEST Ara…
'17.4.1'	'hormone metabolism.cytokinin.synthesis-degradation'	HORVU3Hr1G075920,2	-2.62882	0	'(loc_os01g56810.1 : 576.0) no description available & (at1g75450 : 428.0) This gene used to be called AtCKX6. It encodes a protein whose sequence is similar to cytokinin oxidase/dehydrogenase, which catalyzes the degradation of cytokinins.; cytokinin oxidase 5 (CKX5); CONTAINS InterPro DOMAIN/s: Cytokinin dehydrogenase 1, FAD/cytokinin binding domain (InterPro:IPR015345), FAD-binding, type 2 (In…
'17.7.1.2'	'hormone metabolism.jasmonate.synthesis-degradation.lipoxygenase'	HORVU5Hr1G093770,7	-9.58308	5.5462e-127	'(p29250|lox2_orysa : 1354.0) Lipoxygenase 2 (EC 1.13.11.12) (Lipoxygenase L-2) - Oryza sativa (Rice) & (loc_os03g52860.1 : 1354.0) no description available & (at3g22400 : 953.0) LOX5; FUNCTIONS IN: oxidoreductase activity, acting on single donors with incorporation of molecular oxygen, incorporation of two atoms of oxygen, lipoxygenase activity, iron ion binding, metal ion binding; INVOLVED IN: …
'18.4.6'	'Co-factor and vitamine metabolism.pantothenate.phosphopantothenoylcysteine synthetase (PPCS)'	HORVU7Hr1G116040,2	-10.3174	4.62188e-139	'(loc_os08g07880.1 : 471.0) no description available & (at1g12350 : 306.0) At1g12350 encodes phosphopantothenoylcysteine synthetase (phosphopantothenoylcysteine ligase). Its molecular function was shown to add cysteine forming (R)-4Ă­-phospho-N-pantothenoylcysteine (PPC); 4-phospho-panto-thenoylcysteine synthetase (COAB); FUNCTIONS IN: phosphopantothenate--cysteine ligase activity, catalytic acti…
'19.2'	'tetrapyrrole synthesis.glu-tRNA reductase'	HORVU1Hr1G011520,2	-9.57175	5.4065e-86	'(q96563|hem12_horvu : 829.0) Glutamyl-tRNA reductase 2 (EC 1.2.1.70) (GluTR) (Fragment) - Hordeum vulgare (Barley) & (loc_os10g35840.1 : 785.0) no description available & (at1g58290 : 602.0) Encodes a protein with glutamyl-tRNA reductase (GluTR) activity, catalyzing the NADPH-dependent reduction of Glu-tRNA(Glu) to glutamate 1-semialdehyde (GSA) with the release of free tRNA(Glu). It is involved…
'19.20'	'tetrapyrrole synthesis.ferrochelatase'	HORVU1Hr1G031230,2	-9.70736	1.78246e-166	'(o22101|hemh_orysa : 763.0) Ferrochelatase-2, chloroplast precursor (EC 4.99.1.1) (Ferrochelatase II) (Protoheme ferro-lyase 2) (Heme synthetase 2) - Oryza sativa (Rice) & (loc_os05g29760.2 : 763.0) no description available & (at2g30390 : 614.0) Encodes one of two ferrochelatase genes in Arabidopsis. Ferrochelatase is the terminal enzyme of heme biosynthesis. FC-II is speculated to operate in ph…
'20'	'stress'	HORVU2Hr1G115730,4	-11.4635	0	'(loc_os04g54630.1 : 120.0) no description available & (at2g21970 : 89.4) stress enhanced protein 2 (SEP2) chlorophyll a/b-binding protein; stress enhanced protein 2 (SEP2); Has 34 Blast hits to 34 proteins in 10 species: Archae - 0; Bacteria - 0; Metazoa - 0; Fungi - 0; Plants - 34; Viruses - 0; Other Eukaryotes - 0 (source: NCBI BLink). & (reliability: 178.8) & (original description: no origina…
'20'	'stress'	HORVU5Hr1G032650,1	-12.5725	0	'(loc_os04g54630.1 : 182.0) no description available & (at2g21970 : 138.0) stress enhanced protein 2 (SEP2) chlorophyll a/b-binding protein; stress enhanced protein 2 (SEP2); Has 34 Blast hits to 34 proteins in 10 species: Archae - 0; Bacteria - 0; Metazoa - 0; Fungi - 0; Plants - 34; Viruses - 0; Other Eukaryotes - 0 (source: NCBI BLink). & (reliability: 276.0) & (original description: no origin…
'20'	'stress'	HORVU5Hr1G113630,2	-10.2515	0	'(loc_os04g54630.1 : 173.0) no description available & (at2g21970 : 130.0) stress enhanced protein 2 (SEP2) chlorophyll a/b-binding protein; stress enhanced protein 2 (SEP2); Has 34 Blast hits to 34 proteins in 10 species: Archae - 0; Bacteria - 0; Metazoa - 0; Fungi - 0; Plants - 34; Viruses - 0; Other Eukaryotes - 0 (source: NCBI BLink). & (reliability: 260.0) & (original description: no origin…
'20'	'stress'	HORVU7Hr1G049370,1	-11.9979	0	'(loc_os04g54630.1 : 164.0) no description available & (at2g21970 : 127.0) stress enhanced protein 2 (SEP2) chlorophyll a/b-binding protein; stress enhanced protein 2 (SEP2); Has 34 Blast hits to 34 proteins in 10 species: Archae - 0; Bacteria - 0; Metazoa - 0; Fungi - 0; Plants - 34; Viruses - 0; Other Eukaryotes - 0 (source: NCBI BLink). & (reliability: 254.0) & (original description: no origin…
'20'	'stress'	HORVU7Hr1G113270,9	-11.2473	1.35142e-195	'(loc_os04g54630.1 : 182.0) no description available & (at2g21970 : 138.0) stress enhanced protein 2 (SEP2) chlorophyll a/b-binding protein; stress enhanced protein 2 (SEP2); Has 34 Blast hits to 34 proteins in 10 species: Archae - 0; Bacteria - 0; Metazoa - 0; Fungi - 0; Plants - 34; Viruses - 0; Other Eukaryotes - 0 (source: NCBI BLink). & (reliability: 276.0) & (original description: no origin…
'20'	'stress'	HORVU7Hr1G117000,14	-11.749	0	'(loc_os04g54630.1 : 120.0) no description available & (at2g21970 : 89.4) stress enhanced protein 2 (SEP2) chlorophyll a/b-binding protein; stress enhanced protein 2 (SEP2); Has 34 Blast hits to 34 proteins in 10 species: Archae - 0; Bacteria - 0; Metazoa - 0; Fungi - 0; Plants - 34; Viruses - 0; Other Eukaryotes - 0 (source: NCBI BLink). & (reliability: 178.8) & (original description: no origina…
'20.1'	'stress.biotic'	HORVU3Hr1G030760,6	-10.0056	2.36346e-225	'(loc_os01g12650.1 : 284.0) no description available & (at4g23630 : 225.0) VIRB2-interacting protein 1 (BTI1); INVOLVED IN: biological_process unknown; LOCATED IN: endoplasmic reticulum, plasma membrane, endoplasmic reticulum membrane, vacuole; EXPRESSED IN: 26 plant structures; EXPRESSED DURING: 15 growth stages; CONTAINS InterPro DOMAIN/s: Reticulon (InterPro:IPR003388); BEST Arabidopsis thalia…
'20.1'	'stress.biotic'	HORVU7Hr1G005720,1	-9.8933	5.0664e-63	'(q9sme8|dad2_horvu : 223.0) Defender against cell death 2 (DAD-2) - Hordeum vulgare (Barley) & (loc_os04g32550.1 : 211.0) no description available & (at1g32210 : 182.0) Encodes protein involved in suppression of apoptosis. Complements a mammalian apoptosis suppressor mutation.; DEFENDER AGAINST APOPTOTIC DEATH 1 (ATDAD1); FUNCTIONS IN: molecular_function unknown; INVOLVED IN: anti-apoptosis; LOC…
'20.2.1'	'stress.abiotic.heat'	HORVU1Hr1G027420,5	-9.77314	1.80367e-131	'(loc_os01g08560.2 : 1241.0) no description available & (at1g79930 : 1083.0) encodes high molecular weight heat shock protein 70 not a HSP90 homolog, mRNA is constitutively expressed but transiently induced after heat shock; heat shock protein 91 (HSP91); FUNCTIONS IN: ATP binding; INVOLVED IN: protein folding, response to cadmium ion, response to heat; LOCATED IN: nucleus, plasma membrane; EXPRE…
'20.2.1'	'stress.abiotic.heat'	HORVU3Hr1G000130,7	-9.70908	1.0321e-152	'(loc_os12g15590.2 : 447.0) no description available & (at1g61770 : 387.0) J domain protein.; Chaperone DnaJ-domain superfamily protein; FUNCTIONS IN: unfolded protein binding, heat shock protein binding; INVOLVED IN: protein folding; LOCATED IN: endoplasmic reticulum; EXPRESSED IN: 26 plant structures; EXPRESSED DURING: 15 growth stages; CONTAINS InterPro DOMAIN/s: Molecular chaperone, heat shoc…
'21.1'	'redox.thioredoxin'	HORVU2Hr1G046000,8	-12.057	0	'(loc_os07g34030.2 : 523.0) no description available & (at3g20560 : 367.0) Encodes a protein disulfide isomerase-like (PDIL) protein, a member of a multigene family within the thioredoxin (TRX) superfamily. Unlike several other PDI family members, transcript levels for this gene are not up-regulated in response to three different chemical inducers of ER stress (dithiothreitol, beta-mercaptoethano…
'21.1'	'redox.thioredoxin'	HORVU3Hr1G079960,2	-10.8978	3.15788e-221	'(loc_os07g34030.2 : 555.0) no description available & (at3g20560 : 401.0) Encodes a protein disulfide isomerase-like (PDIL) protein, a member of a multigene family within the thioredoxin (TRX) superfamily. Unlike several other PDI family members, transcript levels for this gene are not up-regulated in response to three different chemical inducers of ER stress (dithiothreitol, beta-mercaptoethano…
'21.1'	'redox.thioredoxin'	HORVU7Hr1G106280,6	-9.90388	2.45594e-33	'(loc_os07g34030.1 : 911.0) no description available & (at3g20560 : 690.0) Encodes a protein disulfide isomerase-like (PDIL) protein, a member of a multigene family within the thioredoxin (TRX) superfamily. Unlike several other PDI family members, transcript levels for this gene are not up-regulated in response to three different chemical inducers of ER stress (dithiothreitol, beta-mercaptoethano…
'21.1'	'redox.thioredoxin'	HORVU7Hr1G119720,3	-9.86109	3.41342e-49	'(q9zp20|trxm_orysa : 142.0) Thioredoxin M-type, chloroplast precursor (TRX-M) - Oryza sativa (Rice) & (loc_os12g08730.1 : 142.0) no description available & (at3g15360 : 130.0) encodes a prokaryotic thioredoxin; thioredoxin M-type 4 (TRX-M4); FUNCTIONS IN: enzyme activator activity; INVOLVED IN: response to oxidative stress, positive regulation of catalytic activity; LOCATED IN: thylakoid, chloro…
'21.1'	'redox.thioredoxin'	HORVU7Hr1G121700,4	-10.8122	2.31008e-219	'(loc_os07g34030.1 : 911.0) no description available & (at3g20560 : 690.0) Encodes a protein disulfide isomerase-like (PDIL) protein, a member of a multigene family within the thioredoxin (TRX) superfamily. Unlike several other PDI family members, transcript levels for this gene are not up-regulated in response to three different chemical inducers of ER stress (dithiothreitol, beta-mercaptoethano…
'21.2'	'redox.ascorbate and glutathione'	HORVU7Hr1G030810,6	-9.90839	8.29076e-44	'(loc_os06g08670.1 : 301.0) no description available & (at2g25080 : 290.0) Encodes glutathione peroxidase.; glutathione peroxidase 1 (GPX1); FUNCTIONS IN: glutathione peroxidase activity; INVOLVED IN: oxidation reduction, response to oxidative stress; LOCATED IN: chloroplast thylakoid membrane, chloroplast stroma, chloroplast, chloroplast envelope; EXPRESSED IN: 23 plant structures; EXPRESSED DUR…
'21.2.2'	'redox.ascorbate and glutathione.glutathione'	HORVU4Hr1G073930,6	-9.71081	0	'(loc_os03g06740.1 : 723.0) no description available & (p80461|gshrp_tobac : 640.0) Glutathione reductase, chloroplast precursor (EC 1.8.1.7) (GR) (GRase) (Fragment) - Nicotiana tabacum (Common tobacco) & (at3g54660 : 635.0) Encodes glutathione reductase that is most likely localized in the chloroplast.; glutathione reductase (GR); FUNCTIONS IN: glutathione-disulfide reductase activity, copper io…
'22.1.5'	polyamine metabolism.synthesis.N-carbamoylputrescine amidohydrolase'	HORVU5Hr1G006730,1	-11.6253	0	'(q93xi4|agub_orysa : 485.0) N-carbamoylputrescine amidase (EC 3.5.1.53) - Oryza sativa (Rice) & (loc_os02g33080.1 : 485.0) no description available & (at2g27450 : 436.0) Encodes N-carbamoylputrescine amidohydrolase that is involved in putrescine and polyamine biosynthesis.; nitrilase-like protein 1 (NLP1); CONTAINS InterPro DOMAIN/s: Nitrilase/cyanide hydratase and apolipoprotein N-acyltransfera…
'23.4.3'	'nucleotide metabolism.phosphotransfer and pyrophosphatases.uridylate kinase'	HORVU2Hr1G029350,6	-9.94691	0	'(loc_os07g43170.3 : 330.0) no description available & (at5g26667 : 279.0) encodes a uridine 5'-monophosphate (UMP)/cytidine 5'-monophosphate (CMP) kinase.; PYR6; FUNCTIONS IN: uridylate kinase activity, cytidylate kinase activity; INVOLVED IN: pyrimidine ribonucleoside monophosphate metabolic process; LOCATED IN: cellular_component unknown; EXPRESSED IN: male gametophyte, cultured cell; EXPRESSE…
'23.4.99'	nucleotide metabolism.phosphotransfer and pyrophosphatases.misc'	HORVU2Hr1G097730,4	-10.2866	1.28485e-261	'(loc_os04g46460.2 : 544.0) no description available & (at3g57560 : 390.0) encodes a N-acetylglutamate kinase, involved in arginine biosynthesis; N-acetyl-l-glutamate kinase (NAGK); FUNCTIONS IN: acetylglutamate kinase activity; INVOLVED IN: arginine biosynthetic process via ornithine, arginine biosynthetic process; LOCATED IN: chloroplast; EXPRESSED IN: 22 plant structures; EXPRESSED DURING: 14 …
'25'	C1-metabolism'	HORVU3Hr1G067110,3	-11.7172	0	'(loc_os01g51410.1 : 910.0) no description available & (o49954|gcsp_soltu : 876.0) Glycine dehydrogenase [decarboxylating], mitochondrial precursor (EC 1.4.4.2) (Glycine decarboxylase) (Glycine cleavage system P-protein) - Solanum tuberosum (Potato) & (at2g26080 : 873.0) glycine decarboxylase P-protein 2 (GLDP2); FUNCTIONS IN: glycine dehydrogenase (decarboxylating) activity, ATP binding; INVOLVE…
'26.1'	'misc.misc2'	HORVU3Hr1G017700,4	-9.74147	0	'(loc_os01g34700.1 : 455.0) no description available & (at2g32520 : 390.0) alpha/beta-Hydrolases superfamily protein; FUNCTIONS IN: hydrolase activity, transferase activity, transferring acyl groups other than amino-acyl groups; INVOLVED IN: response to zinc ion; LOCATED IN: chloroplast; EXPRESSED IN: 24 plant structures; EXPRESSED DURING: 13 growth stages; CONTAINS InterPro DOMAIN/s: Thiolase, a…
'26.3'	'misc.gluco-, galacto- and mannosidases'	HORVU2Hr1G023590,7	-8.24317	0	'(loc_os07g46280.2 : 176.0) no description available & (at3g18080 : 145.0) B-S glucosidase 44 (BGLU44); FUNCTIONS IN: in 6 functions; INVOLVED IN: carbohydrate metabolic process; LOCATED IN: cytosolic ribosome, cell wall, plant-type cell wall; EXPRESSED IN: 22 plant structures; EXPRESSED DURING: 13 growth stages; CONTAINS InterPro DOMAIN/s: Glycoside hydrolase, family 1 (InterPro:IPR001360), Glyc…
'26.10'	'misc.cytochrome P450'	HORVU1Hr1G007830,4	-9.84235	1.40622e-149	'(o48958|c71e1_sorbi : 256.0) Cytochrome P450 71E1 (EC 1.14.13.68) (4-hydroxyphenylacetaldehyde oxime monooxygenase) - Sorghum bicolor (Sorghum) (Sorghum vulgare) & (loc_os03g63310.1 : 256.0) no description available & (at3g26300 : 225.0) putative cytochrome P450; "cytochrome P450, family 71, subfamily B, polypeptide 34" (CYP71B34); FUNCTIONS IN: electron carrier activity, monooxygenase activity,…
'26.11.1'	'misc.alcohol dehydrogenases.cinnamyl alcohol dehydrogenase'	HORVU5Hr1G122150,3	-9.89785	5.08658e-150	'(loc_os01g34480.1 : 533.0) no description available & (at5g19440 : 463.0) similar to Eucalyptus gunnii alcohol dehydrogenase of unknown physiological function (GI:1143445), apple tree, PIR:T16995; NOT a cinnamyl-alcohol dehydrogenase; NAD(P)-binding Rossmann-fold superfamily protein; FUNCTIONS IN: alcohol dehydrogenase (NAD) activity; INVOLVED IN: response to salt stress; LOCATED IN: plasma memb…
'26.13'	'misc.acid and other phosphatases'	HORVU6Hr1G068790,7	-7.04439	4.80064e-30	'(loc_os02g47570.1 : 180.0) no description available & (at3g50920 : 120.0) Phosphatidic acid phosphatase (PAP2) family protein; FUNCTIONS IN: catalytic activity; INVOLVED IN: biological_process unknown; LOCATED IN: membrane; EXPRESSED IN: 23 plant structures; EXPRESSED DURING: 13 growth stages; CONTAINS InterPro DOMAIN/s: Phosphatidic acid phosphatase type 2/haloperoxidase (InterPro:IPR000326); B…
'26.14'	'misc.oxygenases'	HORVU3Hr1G071400,13	-10.5137	0	'(loc_os03g50040.1 : 482.0) no description available & (at2g01490 : 410.0) phytanoyl-CoA dioxygenase (PhyH) family protein; FUNCTIONS IN: phytanoyl-CoA dioxygenase activity; INVOLVED IN: N-terminal protein myristoylation; LOCATED IN: plasma membrane; EXPRESSED IN: 25 plant structures; EXPRESSED DURING: 15 growth stages; CONTAINS InterPro DOMAIN/s: Phytanoyl-CoA dioxygenase (InterPro:IPR008775); H…
'26.14'	'misc.oxygenases'	HORVU3Hr1G096210,2	-10.3185	0	'(loc_os03g50040.1 : 464.0) no description available & (at2g01490 : 394.0) phytanoyl-CoA dioxygenase (PhyH) family protein; FUNCTIONS IN: phytanoyl-CoA dioxygenase activity; INVOLVED IN: N-terminal protein myristoylation; LOCATED IN: plasma membrane; EXPRESSED IN: 25 plant structures; EXPRESSED DURING: 15 growth stages; CONTAINS InterPro DOMAIN/s: Phytanoyl-CoA dioxygenase (InterPro:IPR008775); H…
'26.14'	'misc.oxygenases'	HORVU4Hr1G007050,5	-10.4252	0	'(loc_os03g50040.1 : 467.0) no description available & (at2g01490 : 394.0) phytanoyl-CoA dioxygenase (PhyH) family protein; FUNCTIONS IN: phytanoyl-CoA dioxygenase activity; INVOLVED IN: N-terminal protein myristoylation; LOCATED IN: plasma membrane; EXPRESSED IN: 25 plant structures; EXPRESSED DURING: 15 growth stages; CONTAINS InterPro DOMAIN/s: Phytanoyl-CoA dioxygenase (InterPro:IPR008775); H…
'26.2'	'misc.UDP glucosyl and glucoronyl transferases'	HORVU3Hr1G036630,1	-9.80413	0	'(loc_os01g15780.1 : 412.0) no description available & (at1g75420 : 363.0) UDP-Glycosyltransferase superfamily protein; FUNCTIONS IN: transferase activity, transferring glycosyl groups; INVOLVED IN: biosynthetic process; LOCATED IN: cellular_component unknown; EXPRESSED IN: 22 plant structures; EXPRESSED DURING: 13 growth stages; CONTAINS InterPro DOMAIN/s: Glycosyl transferase, group 1 (InterPro…
'26.3.1'	'misc.gluco-, galacto- and mannosidases.alpha-galactosidase'	HORVU7Hr1G106540,20	-9.76653	7.9931e-62	'(q43763|aglu_horvu : 1137.0) Alpha-glucosidase precursor (EC 3.2.1.20) (Maltase) - Hordeum vulgare (Barley) & (loc_os06g46284.1 : 984.0) no description available & (at5g11720 : 795.0) Glycosyl hydrolases family 31 protein; FUNCTIONS IN: hydrolase activity, hydrolyzing O-glycosyl compounds; INVOLVED IN: carbohydrate metabolic process; LOCATED IN: apoplast, vacuole, plant-type cell wall; EXPRESSED…
'26.3.3'	'misc.gluco-, galacto- and mannosidases.alpha-mannosidase'	HORVU5Hr1G113880,26	-9.92035	0	'(loc_os11g32260.1 : 894.0) no description available & (at5g13980 : 730.0) Glycosyl hydrolase family 38 protein; FUNCTIONS IN: in 6 functions; INVOLVED IN: mannose metabolic process, carbohydrate metabolic process; LOCATED IN: apoplast, cell wall, plasma membrane, vacuole, plant-type cell wall; EXPRESSED IN: 25 plant structures; EXPRESSED DURING: 13 growth stages; CONTAINS InterPro DOMAIN/s: Glyc…
'26.4'	'misc.beta 1,3 glucan hydrolases'	HORVU6Hr1G079630,8	-9.56986	4.14988e-225	'(loc_os02g53200.2 : 540.0) no description available & (at5g55180 : 384.0) O-Glycosyl hydrolases family 17 protein; FUNCTIONS IN: cation binding, hydrolase activity, hydrolyzing O-glycosyl compounds, catalytic activity; INVOLVED IN: carbohydrate metabolic process; LOCATED IN: endomembrane system; EXPRESSED IN: 18 plant structures; EXPRESSED DURING: 11 growth stages; CONTAINS InterPro DOMAIN/s: X8…
'26.4.1'	'misc.beta 1,3 glucan hydrolases.glucan endo-1,3-beta-glucosidase'	HORVU0Hr1G021950,2	-9.97585	1.24006e-185	'(loc_os06g40490.1 : 347.0) no description available & (at2g26600 : 263.0) Glycosyl hydrolase superfamily protein; FUNCTIONS IN: cation binding, hydrolase activity, hydrolyzing O-glycosyl compounds, catalytic activity; INVOLVED IN: carbohydrate metabolic process; LOCATED IN: anchored to membrane; EXPRESSED IN: 22 plant structures; EXPRESSED DURING: 13 growth stages; CONTAINS InterPro DOMAIN/s: Gl…
'27.1'	'RNA.processing'	HORVU1Hr1G039050,21	-10.3587	4.47638e-272	'(loc_os08g22354.2 : 676.0) no description available & (at4g34110 : 519.0) Putative poly-A binding protein. Member of a gene family .Expressed in stele and root meristem and post-fertilization ovules.Member of the class II family of PABP proteins.; poly(A) binding protein 2 (PAB2); FUNCTIONS IN: RNA binding, translation initiation factor activity; INVOLVED IN: response to salt stress, translation…
'27.1'	'RNA.processing'	HORVU1Hr1G087660,15	-10.4645	2.71976e-197	'(loc_os06g51350.1 : 555.0) no description available & (at5g20040 : 435.0) Encodes tRNA isopentenyltransferase AtIPT9.; isopentenyltransferase 9 (IPT9); FUNCTIONS IN: tRNA dimethylallyltransferase activity, ATP binding; INVOLVED IN: tRNA processing, cytokinin biosynthetic process; EXPRESSED IN: 19 plant structures; EXPRESSED DURING: 13 growth stages; CONTAINS InterPro DOMAIN/s: tRNA delta(2)-isop…
'27.1'	'RNA.processing'	HORVU2Hr1G063950,4	-10.8138	1.96664e-108	'(loc_os08g22354.2 : 686.0) no description available & (at4g34110 : 526.0) Putative poly-A binding protein. Member of a gene family .Expressed in stele and root meristem and post-fertilization ovules.Member of the class II family of PABP proteins.; poly(A) binding protein 2 (PAB2); FUNCTIONS IN: RNA binding, translation initiation factor activity; INVOLVED IN: response to salt stress, translation…
'27.1'	'RNA.processing'	HORVU2Hr1G087390,1	-10.3696	1.72572e-87	'(loc_os06g51350.1 : 555.0) no description available & (at5g20040 : 435.0) Encodes tRNA isopentenyltransferase AtIPT9.; isopentenyltransferase 9 (IPT9); FUNCTIONS IN: tRNA dimethylallyltransferase activity, ATP binding; INVOLVED IN: tRNA processing, cytokinin biosynthetic process; EXPRESSED IN: 19 plant structures; EXPRESSED DURING: 13 growth stages; CONTAINS InterPro DOMAIN/s: tRNA delta(2)-isop…
'27.1'	'RNA.processing'	HORVU2Hr1G106810,4	-9.83447	0	'(loc_os04g53440.2 : 484.0) no description available & (at1g11650 : 379.0) RBP45B; FUNCTIONS IN: RNA binding; EXPRESSED IN: 26 plant structures; EXPRESSED DURING: 16 growth stages; CONTAINS InterPro DOMAIN/s: RNA recognition motif, RNP-1 (InterPro:IPR000504), Nucleotide-binding, alpha-beta plait (InterPro:IPR012677); BEST Arabidopsis thaliana protein match is: RNA-binding protein 45A (TAIR:AT5G54…
'27.1'	'RNA.processing'	HORVU3Hr1G012850,19	-10.7423	1.27669e-184	'(loc_os08g22354.2 : 574.0) no description available & (at1g49760 : 420.0) polyadenylate-binding protein, putative / PABP, putative, similar to poly(A)-binding protein GB:AAF66825 GI:7673359 from (Nicotiana tabacum). Highly and ubiquitously expressed. Member of the class II PABP family.; poly(A) binding protein 8 (PAB8); CONTAINS InterPro DOMAIN/s: Polyadenylate-binding protein/Hyperplastic disc …
'27.1'	'RNA.processing'	HORVU3Hr1G068500,3	-11.7805	0	'(loc_os06g51350.1 : 555.0) no description available & (at5g20040 : 435.0) Encodes tRNA isopentenyltransferase AtIPT9.; isopentenyltransferase 9 (IPT9); FUNCTIONS IN: tRNA dimethylallyltransferase activity, ATP binding; INVOLVED IN: tRNA processing, cytokinin biosynthetic process; EXPRESSED IN: 19 plant structures; EXPRESSED DURING: 13 growth stages; CONTAINS InterPro DOMAIN/s: tRNA delta(2)-isop…
'27.1'	'RNA.processing'	HORVU3Hr1G117680,43	-10.7682	0	'(loc_os06g51350.1 : 555.0) no description available & (at5g20040 : 435.0) Encodes tRNA isopentenyltransferase AtIPT9.; isopentenyltransferase 9 (IPT9); FUNCTIONS IN: tRNA dimethylallyltransferase activity, ATP binding; INVOLVED IN: tRNA processing, cytokinin biosynthetic process; EXPRESSED IN: 19 plant structures; EXPRESSED DURING: 13 growth stages; CONTAINS InterPro DOMAIN/s: tRNA delta(2)-isop…
'27.1'	'RNA.processing'	HORVU4Hr1G021000,6	-9.84862	1.82702e-97	'(loc_os06g51350.1 : 555.0) no description available & (at5g20040 : 435.0) Encodes tRNA isopentenyltransferase AtIPT9.; isopentenyltransferase 9 (IPT9); FUNCTIONS IN: tRNA dimethylallyltransferase activity, ATP binding; INVOLVED IN: tRNA processing, cytokinin biosynthetic process; EXPRESSED IN: 19 plant structures; EXPRESSED DURING: 13 growth stages; CONTAINS InterPro DOMAIN/s: tRNA delta(2)-isop…
'27.1'	'RNA.processing'	HORVU5Hr1G011460,5	-10.5594	0	'(loc_os08g22354.2 : 676.0) no description available & (at4g34110 : 519.0) Putative poly-A binding protein. Member of a gene family .Expressed in stele and root meristem and post-fertilization ovules.Member of the class II family of PABP proteins.; poly(A) binding protein 2 (PAB2); FUNCTIONS IN: RNA binding, translation initiation factor activity; INVOLVED IN: response to salt stress, translation…
'27.1'	'RNA.processing'	HORVU5Hr1G016350,10	-10.8074	0	'(loc_os06g51350.1 : 555.0) no description available & (at5g20040 : 435.0) Encodes tRNA isopentenyltransferase AtIPT9.; isopentenyltransferase 9 (IPT9); FUNCTIONS IN: tRNA dimethylallyltransferase activity, ATP binding; INVOLVED IN: tRNA processing, cytokinin biosynthetic process; EXPRESSED IN: 19 plant structures; EXPRESSED DURING: 13 growth stages; CONTAINS InterPro DOMAIN/s: tRNA delta(2)-isop…
'27.1'	'RNA.processing'	HORVU5Hr1G033640,3	-10.5934	2.4672e-241	'(loc_os06g51350.1 : 555.0) no description available & (at5g20040 : 435.0) Encodes tRNA isopentenyltransferase AtIPT9.; isopentenyltransferase 9 (IPT9); FUNCTIONS IN: tRNA dimethylallyltransferase activity, ATP binding; INVOLVED IN: tRNA processing, cytokinin biosynthetic process; EXPRESSED IN: 19 plant structures; EXPRESSED DURING: 13 growth stages; CONTAINS InterPro DOMAIN/s: tRNA delta(2)-isop…
'27.1'	'RNA.processing'	HORVU5Hr1G076400,5	-10.3276	0	'(loc_os08g22354.2 : 876.0) no description available & (at1g49760 : 632.0) polyadenylate-binding protein, putative / PABP, putative, similar to poly(A)-binding protein GB:AAF66825 GI:7673359 from (Nicotiana tabacum). Highly and ubiquitously expressed. Member of the class II PABP family.; poly(A) binding protein 8 (PAB8); CONTAINS InterPro DOMAIN/s: Polyadenylate-binding protein/Hyperplastic disc …
'27.1'	'RNA.processing'	HORVU5Hr1G076780,7	-11.5265	0	'(loc_os08g22354.2 : 432.0) no description available & (at2g23350 : 330.0) polyadenylate-binding protein, putative / PABP, putative.Member of the Class II family of PABP proteins. Highly and ubiquitously expressed.; poly(A) binding protein 4 (PAB4); FUNCTIONS IN: RNA binding, translation initiation factor activity; INVOLVED IN: response to cadmium ion; EXPRESSED IN: 24 plant structures; EXPRESSED…
'27.1'	'RNA.processing'	HORVU6Hr1G040220,10	-10.8948	1.35635e-159	'(loc_os08g22354.2 : 440.0) no description available & (at1g49760 : 307.0) polyadenylate-binding protein, putative / PABP, putative, similar to poly(A)-binding protein GB:AAF66825 GI:7673359 from (Nicotiana tabacum). Highly and ubiquitously expressed. Member of the class II PABP family.; poly(A) binding protein 8 (PAB8); CONTAINS InterPro DOMAIN/s: Polyadenylate-binding protein/Hyperplastic disc …
'27.1'	'RNA.processing'	HORVU6Hr1G045250,3	-10.4858	2.34244e-173	'(loc_os08g22354.2 : 917.0) no description available & (at1g49760 : 659.0) polyadenylate-binding protein, putative / PABP, putative, similar to poly(A)-binding protein GB:AAF66825 GI:7673359 from (Nicotiana tabacum). Highly and ubiquitously expressed. Member of the class II PABP family.; poly(A) binding protein 8 (PAB8); CONTAINS InterPro DOMAIN/s: Polyadenylate-binding protein/Hyperplastic disc …
'27.1'	'RNA.processing'	HORVU7Hr1G031320,16	-10.8424	0	'(loc_os06g51350.1 : 555.0) no description available & (at5g20040 : 435.0) Encodes tRNA isopentenyltransferase AtIPT9.; isopentenyltransferase 9 (IPT9); FUNCTIONS IN: tRNA dimethylallyltransferase activity, ATP binding; INVOLVED IN: tRNA processing, cytokinin biosynthetic process; EXPRESSED IN: 19 plant structures; EXPRESSED DURING: 13 growth stages; CONTAINS InterPro DOMAIN/s: tRNA delta(2)-isop…
'27.1'	'RNA.processing'	HORVU7Hr1G063970,12	-10.9542	1.53801e-253	'(loc_os08g22354.2 : 570.0) no description available & (at4g34110 : 435.0) Putative poly-A binding protein. Member of a gene family .Expressed in stele and root meristem and post-fertilization ovules.Member of the class II family of PABP proteins.; poly(A) binding protein 2 (PAB2); FUNCTIONS IN: RNA binding, translation initiation factor activity; INVOLVED IN: response to salt stress, translation…
'27.1'	'RNA.processing'	HORVU7Hr1G071790,2	-12.444	0	'(loc_os06g51350.1 : 555.0) no description available & (at5g20040 : 435.0) Encodes tRNA isopentenyltransferase AtIPT9.; isopentenyltransferase 9 (IPT9); FUNCTIONS IN: tRNA dimethylallyltransferase activity, ATP binding; INVOLVED IN: tRNA processing, cytokinin biosynthetic process; EXPRESSED IN: 19 plant structures; EXPRESSED DURING: 13 growth stages; CONTAINS InterPro DOMAIN/s: tRNA delta(2)-isop…
'27.1'	'RNA.processing'	HORVU7Hr1G115180,10	-10.2574	5.04444e-243	'(loc_os08g22354.2 : 563.0) no description available & (at1g49760 : 389.0) polyadenylate-binding protein, putative / PABP, putative, similar to poly(A)-binding protein GB:AAF66825 GI:7673359 from (Nicotiana tabacum). Highly and ubiquitously expressed. Member of the class II PABP family.; poly(A) binding protein 8 (PAB8); CONTAINS InterPro DOMAIN/s: Polyadenylate-binding protein/Hyperplastic disc …
'27.1'	'RNA.processing'	HORVU7Hr1G120070,7	-5.88264	2.14552e-07	'(loc_os08g22354.2 : 612.0) no description available & (at1g49760 : 445.0) polyadenylate-binding protein, putative / PABP, putative, similar to poly(A)-binding protein GB:AAF66825 GI:7673359 from (Nicotiana tabacum). Highly and ubiquitously expressed. Member of the class II PABP family.; poly(A) binding protein 8 (PAB8); CONTAINS InterPro DOMAIN/s: Polyadenylate-binding protein/Hyperplastic disc …
'27.1.1'	'RNA.processing.splicing'	HORVU4Hr1G000670,13	-9.72451	1.77916e-55	'(loc_os06g30020.1 : 432.0) no description available & (at1g67210 : 242.0) Proline-rich spliceosome-associated (PSP) family protein / zinc knuckle (CCHC-type) family protein; FUNCTIONS IN: zinc ion binding, nucleic acid binding; INVOLVED IN: biological_process unknown; LOCATED IN: cellular_component unknown; EXPRESSED IN: sperm cell; CONTAINS InterPro DOMAIN/s: PSP, proline-rich (InterPro:IPR0065…
'27.1.1'	'RNA.processing.splicing'	HORVU4Hr1G038850,14	-9.59805	0	'(loc_os11g41820.1 : 568.0) no description available & (at4g36690 : 479.0) ATU2AF65A; FUNCTIONS IN: RNA binding, nucleotide binding, nucleic acid binding; INVOLVED IN: nuclear mRNA splicing, via spliceosome; LOCATED IN: nucleus; EXPRESSED IN: 25 plant structures; EXPRESSED DURING: 15 growth stages; CONTAINS InterPro DOMAIN/s: RNA recognition motif, RNP-1 (InterPro:IPR000504), Nucleotide-binding, …
'27.1.1'	'RNA.processing.splicing'	HORVU7Hr1G019870,1	-9.6987	1.78738e-212	'(loc_os05g08600.2 : 288.0) no description available & (at5g37370 : 268.0) encodes a putative splicing factor. Over-expression in yeast and Arabidopsis result in increased tolerance to high salt.; ATSRL1; FUNCTIONS IN: binding; INVOLVED IN: response to salt stress, RNA processing; LOCATED IN: cellular_component unknown; EXPRESSED IN: 24 plant structures; EXPRESSED DURING: 15 growth stages; CONTAI…
'27.1.3.1'	'RNA.processing.3' end processing.PAP'	HORVU7Hr1G088370,11	-9.83289	7.893e-73	'(loc_os06g36360.3 : 838.0) no description available & (at4g32850 : 559.0) Encodes a nuclear poly(A) polymerase. Located in the nucleus.; nuclear poly(a) polymerase (nPAP); CONTAINS InterPro DOMAIN/s: Poly(A) polymerase (InterPro:IPR014492), Nucleotidyltransferase, class I, C-terminal-like (InterPro:IPR011068), Poly(A) polymerase, central domain (InterPro:IPR007012), Nucleotidyl transferase domai…
'27.2'	'RNA.transcription'	HORVU3Hr1G019090,2	-9.72451	0	'(loc_os05g23940.1 : 669.0) no description available & (at3g09360 : 316.0) Cyclin/Brf1-like TBP-binding protein; FUNCTIONS IN: RNA polymerase II transcription factor activity, transcription regulator activity, transcription activator activity, zinc ion binding, translation initiation factor activity; INVOLVED IN: translational initiation, positive regulation of transcription, regulation of transc…
'27.2'	'RNA.transcription'	HORVU7Hr1G076780,7	-9.57554	0	'(loc_os08g01930.1 : 155.0) no description available & (at1g33680 : 94.0) KH domain-containing protein; FUNCTIONS IN: RNA binding, nucleic acid binding; INVOLVED IN: biological_process unknown; LOCATED IN: cellular_component unknown; EXPRESSED IN: 21 plant structures; EXPRESSED DURING: 13 growth stages; CONTAINS InterPro DOMAIN/s: K Homology, type 1, subgroup (InterPro:IPR018111), K Homology (Int…
'27.3.22'	'RNA.regulation of transcription.HB,Homeobox transcription factor family'	HORVU4Hr1G003800,7	-9.87036	0	'(loc_os03g47740.3 : 941.0) no description available & (at4g34610 : 344.0) BEL1-like homeodomain 6 (BLH6); FUNCTIONS IN: DNA binding, sequence-specific DNA binding transcription factor activity; INVOLVED IN: regulation of transcription, DNA-dependent, regulation of transcription; EXPRESSED IN: 21 plant structures; EXPRESSED DURING: 13 growth stages; CONTAINS InterPro DOMAIN/s: Homeobox (InterPro:…
'27.3.35'	'RNA.regulation of transcription.bZIP transcription factor family'	HORVU7Hr1G117020,5	-9.71081	5.43072e-202	'(loc_os06g50310.1 : 300.0) no description available & (at4g35040 : 181.0) Basic-region leucine zipper (bZIP19) transcription factor involved in the adaptation to zinc deficiency. Binds ZDRE motifs.; bZIP19; FUNCTIONS IN: protein binding, DNA binding, sequence-specific DNA binding transcription factor activity; INVOLVED IN: cellular response to zinc ion, response to zinc ion; LOCATED IN: nucleus;…
'27.3.4'	'RNA.regulation of transcription.ARF, Auxin Response Factor family'	HORVU7Hr1G106280,6	-9.90388	2.45594e-33	'(loc_os06g46410.1 : 1376.0) no description available & (at1g30330 : 758.0) Encodes a member of the auxin response factor family. Mediates auxin response via expression of auxin regulated genes. Acts redundantly with ARF8 to control stamen elongation and flower maturation. Expression of ARF6 is controlled by miR167.; auxin response factor 6 (ARF6); FUNCTIONS IN: sequence-specific DNA binding tran…
'27.3.52'	'RNA.regulation of transcription.Global transcription factor group'	HORVU2Hr1G010380,9	-10.2204	0	'(q7x923|spt16_orysa : 1552.0) FACT complex subunit SPT16 (Facilitates chromatin transcription complex subunit SPT16) - Oryza sativa (Rice) & (loc_os04g25550.1 : 1552.0) no description available & (at4g10710 : 1253.0) encodes a component of the FAcilitates Chromatin Transcription (FACT) complex, SPT16.Along with SSRP1 binds to the promoter of FLC.; global transcription factor C (SPT16); INVOLVED …
'27.3.55'	'RNA.regulation of transcription.HDA'	HORVU6Hr1G038010,7	-10.0875	3.12234e-117	'(loc_os08g25570.1 : 753.0) no description available & (at5g63110 : 624.0) RPD3-like histone deacetylase. HDA6 mutations specifically increase the expression of auxin-responsive transgenes, suggesting a role in transgene silencing.; histone deacetylase 6 (HDA6); FUNCTIONS IN: histone deacetylase activity; INVOLVED IN: response to salt stress, gene silencing, posttranscriptional gene silencing, re…
'27.3.67'	'RNA.regulation of transcription.putative transcription regulator'	HORVU2Hr1G105390,11	-9.59432	4.69708e-211	'(loc_os12g38440.3 : 263.0) no description available & (at1g15910 : 101.0) XH/XS domain-containing protein; CONTAINS InterPro DOMAIN/s: Domain of unknown function XS (InterPro:IPR005380), Domain of unknown function XH (InterPro:IPR005379), Domain of unknown function, putative Zinc finger, XS/XH (InterPro:IPR005381); BEST Arabidopsis thaliana protein match is: XH/XS domain-containing protein (TAIR…
'27.3.67'	'RNA.regulation of transcription.putative transcription regulator'	HORVU4Hr1G002170,9	-9.91886	3.24822e-67	'(loc_os03g44900.1 : 485.0) no description available & (at5g18230 : 445.0) transcription regulator NOT2/NOT3/NOT5 family protein; FUNCTIONS IN: transcription regulator activity; INVOLVED IN: negative regulation of transcription, regulation of transcription; LOCATED IN: nucleus; EXPRESSED IN: 24 plant structures; EXPRESSED DURING: 15 growth stages; CONTAINS InterPro DOMAIN/s: NOT2/NOT3/NOT5 (Inter…
'27.3.67'	'RNA.regulation of transcription.putative transcription regulator'	HORVU5Hr1G048960,5	-9.86264	0	'(loc_os12g01190.3 : 1149.0) no description available & (at5g60170 : 466.0) RNA binding (RRM/RBD/RNP motifs) family protein; FUNCTIONS IN: RNA binding, nucleotide binding, zinc ion binding, nucleic acid binding; INVOLVED IN: biological_process unknown; LOCATED IN: cellular_component unknown; EXPRESSED IN: 24 plant structures; EXPRESSED DURING: 15 growth stages; CONTAINS InterPro DOMAIN/s: Zinc fi…
'27.3.67'	'RNA.regulation of transcription.putative transcription regulator'	HORVU5Hr1G053470,12	-9.72451	0	'(loc_os01g32720.1 : 793.0) no description available & (at5g55390 : 356.0) Encodes EDM2 (enhanced downy mildew 2). The predicted protein bears typical features of transcriptional regulators. EDM2 contains two putative bipartite nuclear localization signals (NLS) two zinc-finger-like motifs, a Proline-rich region and a large aspartic acid-rich region. Both zinc-finger-like stretches resemble the P…
'27.3.99'	'RNA.regulation of transcription.unclassified'	HORVU1Hr1G069060,4	-9.63118	4.32166e-142	'(loc_os03g52594.3 : 697.0) no description available & (at5g59710 : 493.0) Encodes a nuclear-localized NOT (negative on TATA-less) domain-containing protein that interacts with the Agrobacterium VirE2 protein and is required for Agrobacterium-mediated plant transformation. It likely facilitates T-DNA integration into plant chromosomes and may play a role as a transcriptional regulator.; VIRE2 int…
'27.3.99'	'RNA.regulation of transcription.unclassified'	HORVU6Hr1G095320,18	-7.25739	0	'(loc_os03g52594.3 : 851.0) no description available & (at1g07705 : 535.0) NOT2 / NOT3 / NOT5 family; FUNCTIONS IN: transcription regulator activity; INVOLVED IN: regulation of transcription; LOCATED IN: nucleus, chloroplast; EXPRESSED IN: 23 plant structures; EXPRESSED DURING: 13 growth stages; CONTAINS InterPro DOMAIN/s: NOT2/NOT3/NOT5 (InterPro:IPR007282); BEST Arabidopsis thaliana protein mat…
'27.4'	'RNA.RNA binding'	HORVU7Hr1G075450,23	-10.1408	4.98262e-119	'(loc_os08g02330.1 : 313.0) no description available & (at1g32790 : 289.0) RNA-binding protein, putative, similar to RNA-binding protein GB:CAB40027 GI:4539439 from (Arabidopsis thaliana).Member of a family of PAB2 binding domain proteins.; CTC-interacting domain 11 (CID11); FUNCTIONS IN: RNA binding, nucleotide binding, nucleic acid binding; INVOLVED IN: biological_process unknown; EXPRESSED IN:…
'28.1'	'DNA.synthesis/chromatin structure'	HORVU1Hr1G020070,2	-11.2348	0	'(loc_os05g46230.1 : 334.0) no description available & (at2g19480 : 269.0) This gene is predicted to encode a nucleosome assembly protein. Plant lines expressing an RNAi construct directed against this gene show a reduction in agrobacterium-mediated root transformation.; nucleosome assembly protein 1;2 (NAP1;2); CONTAINS InterPro DOMAIN/s: Nucleosome assembly protein (NAP) (InterPro:IPR002164); B…
'28.1'	'DNA.synthesis/chromatin structure'	HORVU1Hr1G022400,4	-11.3326	0	'(loc_os05g46230.1 : 342.0) no description available & (at2g19480 : 271.0) This gene is predicted to encode a nucleosome assembly protein. Plant lines expressing an RNAi construct directed against this gene show a reduction in agrobacterium-mediated root transformation.; nucleosome assembly protein 1;2 (NAP1;2); CONTAINS InterPro DOMAIN/s: Nucleosome assembly protein (NAP) (InterPro:IPR002164); B…
'28.1'	'DNA.synthesis/chromatin structure'	HORVU1Hr1G029770,13	-10.5755	4.8515e-290	'(loc_os05g46230.1 : 342.0) no description available & (at2g19480 : 271.0) This gene is predicted to encode a nucleosome assembly protein. Plant lines expressing an RNAi construct directed against this gene show a reduction in agrobacterium-mediated root transformation.; nucleosome assembly protein 1;2 (NAP1;2); CONTAINS InterPro DOMAIN/s: Nucleosome assembly protein (NAP) (InterPro:IPR002164); B…
'28.1'	'DNA.synthesis/chromatin structure'	HORVU1Hr1G046020,3	-9.93517	1.20435e-103	'(loc_os10g35990.1 : 783.0) no description available & (at4g00660 : 733.0) RNAhelicase-like 8 (RH8); FUNCTIONS IN: helicase activity, nucleic acid binding, ATP-dependent helicase activity, ATP binding; INVOLVED IN: viral reproduction, virus-host interaction; EXPRESSED IN: 24 plant structures; EXPRESSED DURING: 15 growth stages; CONTAINS InterPro DOMAIN/s: RNA helicase, DEAD-box type, Q motif (Int…
'28.1'	'DNA.synthesis/chromatin structure'	HORVU1Hr1G070700,3	-11.2691	1.46134e-76	'(loc_os05g46230.1 : 328.0) no description available & (at2g19480 : 259.0) This gene is predicted to encode a nucleosome assembly protein. Plant lines expressing an RNAi construct directed against this gene show a reduction in agrobacterium-mediated root transformation.; nucleosome assembly protein 1;2 (NAP1;2); CONTAINS InterPro DOMAIN/s: Nucleosome assembly protein (NAP) (InterPro:IPR002164); B…
'28.1'	'DNA.synthesis/chromatin structure'	HORVU1Hr1G080060,9	-11.6578	0	'(loc_os05g46230.1 : 342.0) no description available & (at2g19480 : 271.0) This gene is predicted to encode a nucleosome assembly protein. Plant lines expressing an RNAi construct directed against this gene show a reduction in agrobacterium-mediated root transformation.; nucleosome assembly protein 1;2 (NAP1;2); CONTAINS InterPro DOMAIN/s: Nucleosome assembly protein (NAP) (InterPro:IPR002164); B…
'28.1'	'DNA.synthesis/chromatin structure'	HORVU2Hr1G022720,7	-9.69	2.77074e-146	'(loc_os07g46540.1 : 1721.0) no description available & (at3g57060 : 1330.0) binding; FUNCTIONS IN: binding; INVOLVED IN: mitosis, chromosome condensation; LOCATED IN: nucleus, condensin complex; EXPRESSED IN: 15 plant structures; EXPRESSED DURING: 6 growth stages; CONTAINS InterPro DOMAIN/s: Non-SMC condensin subunit, XCAP-D2/Cnd1 (InterPro:IPR007673), Armadillo-type fold (InterPro:IPR016024); B…
'28.1.3.2.4'	'DNA.synthesis/chromatin structure.histone.core.H4'	HORVU5Hr1G079130,2	-9.95565	0	'(at5g59970 : 162.0) Histone superfamily protein; FUNCTIONS IN: DNA binding; INVOLVED IN: nucleosome assembly; LOCATED IN: vacuole; CONTAINS InterPro DOMAIN/s: Histone H4, conserved site (InterPro:IPR019809), Histone-fold (InterPro:IPR009072), Histone core (InterPro:IPR007125), Histone H4 (InterPro:IPR001951); BEST Arabidopsis thaliana protein match is: Histone superfamily protein (TAIR:AT5G59690…
'28.99'	'DNA.unspecified'	HORVU4Hr1G046140,3	-9.78463	0	'(loc_os03g22900.1 : 1788.0) no description available & (at3g57300 : 1290.0) Encodes the Arabidopsis INO80 ortholog of the SWI/SNF ATPase family. Functions as a positive regulator of DNA homologous recombination (HR). In INO80 mutants, the HR frequency is reduced to 15% of that in the wild-type. Mutation in INO80 does not affect sensitivity to genotoxic agents and efficiency of T-DNA integration.…
'29.1.11'	'protein.aa activation.serine-tRNA ligase'	HORVU6Hr1G080800,6	-9.69174	5.33604e-137	'(loc_os01g37837.2 : 541.0) no description available & (o81983|sys_helan : 452.0) Seryl-tRNA synthetase (EC 6.1.1.11) (Serine--tRNA ligase) (SerRS) - Helianthus annuus (Common sunflower) & (at5g27470 : 441.0) seryl-tRNA synthetase / serine--tRNA ligase; FUNCTIONS IN: serine-tRNA ligase activity, aminoacyl-tRNA ligase activity, nucleotide binding, ATP binding; INVOLVED IN: response to cadmium ion,…
'29.1.19'	'protein.aa activation.arginine-tRNA ligase'	HORVU1Hr1G073500,2	-10.0355	0	'(loc_os05g37434.1 : 859.0) no description available & (at3g11240 : 498.0) Encodes an arginyl-tRNA:protein arginyltransferase (ATE2), a component of the N-end rule pathway that targets protein degradation through the identity of the amino-terminal residue of specific protein substrates. Arabidopsis contains two ATE genes: At5g05700/ATE1, At3g11240/ATE2. Another component of the N-end rule pathway…
'29.1.22'	'protein.aa activation.asparagine-tRNA ligase'	HORVU1Hr1G021130,3	-10.3083	2.17986e-83	'(loc_os01g27520.1 : 816.0) no description available & (at5g56680 : 662.0) Encodes a putative cytosolic asparaginyl-tRNA synthetase.; SYNC1; FUNCTIONS IN: in 6 functions; INVOLVED IN: response to cadmium ion, embryo development ending in seed dormancy; LOCATED IN: mitochondrion, chloroplast; EXPRESSED IN: cotyledon, guard cell, cultured cell, leaf; CONTAINS InterPro DOMAIN/s: Nucleic acid-binding…
'29.1.22'	'protein.aa activation.asparagine-tRNA ligase'	HORVU3Hr1G087380,4	-10.4019	0	'(loc_os01g27520.2 : 716.0) no description available & (at1g70980 : 562.0) SYNC3; FUNCTIONS IN: in 6 functions; INVOLVED IN: asparaginyl-tRNA aminoacylation, aspartyl-tRNA aminoacylation, translation, tRNA aminoacylation for protein translation; LOCATED IN: cytoplasm; EXPRESSED IN: male gametophyte, pollen tube; EXPRESSED DURING: L mature pollen stage, M germinated pollen stage; CONTAINS InterPro…
'29.1.22'	'protein.aa activation.asparagine-tRNA ligase'	HORVU4Hr1G027410,11	-11.9046	0	'(loc_os01g27520.1 : 421.0) no description available & (at5g56680 : 367.0) Encodes a putative cytosolic asparaginyl-tRNA synthetase.; SYNC1; FUNCTIONS IN: in 6 functions; INVOLVED IN: response to cadmium ion, embryo development ending in seed dormancy; LOCATED IN: mitochondrion, chloroplast; EXPRESSED IN: cotyledon, guard cell, cultured cell, leaf; CONTAINS InterPro DOMAIN/s: Nucleic acid-binding…
'29.1.22'	'protein.aa activation.asparagine-tRNA ligase'	HORVU4Hr1G070370,4	-10.4878	0	'(loc_os01g27520.1 : 949.0) no description available & (at5g56680 : 777.0) Encodes a putative cytosolic asparaginyl-tRNA synthetase.; SYNC1; FUNCTIONS IN: in 6 functions; INVOLVED IN: response to cadmium ion, embryo development ending in seed dormancy; LOCATED IN: mitochondrion, chloroplast; EXPRESSED IN: cotyledon, guard cell, cultured cell, leaf; CONTAINS InterPro DOMAIN/s: Nucleic acid-binding…
'29.1.22'	'protein.aa activation.asparagine-tRNA ligase'	HORVU4Hr1G077240,2	-10.8857	3.7488e-123	'(loc_os01g27520.1 : 578.0) no description available & (at5g56680 : 479.0) Encodes a putative cytosolic asparaginyl-tRNA synthetase.; SYNC1; FUNCTIONS IN: in 6 functions; INVOLVED IN: response to cadmium ion, embryo development ending in seed dormancy; LOCATED IN: mitochondrion, chloroplast; EXPRESSED IN: cotyledon, guard cell, cultured cell, leaf; CONTAINS InterPro DOMAIN/s: Nucleic acid-binding…
'29.1.4'	'protein.aa activation.leucine-tRNA ligase'	HORVU3Hr1G032730,2	-9.84078	0	'(loc_os09g32650.1 : 1817.0) no description available & (at1g09620 : 1459.0) ATP binding;leucine-tRNA ligases;aminoacyl-tRNA ligases;nucleotide binding;ATP binding;aminoacyl-tRNA ligases; FUNCTIONS IN: nucleotide binding, aminoacyl-tRNA ligase activity, leucine-tRNA ligase activity, ATP binding; INVOLVED IN: leucyl-tRNA aminoacylation, translation, tRNA aminoacylation for protein translation; LOC…
'29.1.7'	'protein.aa activation.alanine-tRNA ligase'	HORVU1Hr1G028820,4	-10.5878	7.77164e-115	'(loc_os10g10244.1 : 323.0) no description available & (at1g50200 : 235.0) Alanyl-tRNA synthetase (ALATS); FUNCTIONS IN: alanine-tRNA ligase activity, ligase activity, forming aminoacyl-tRNA and related compounds, nucleotide binding, ATP binding, nucleic acid binding; INVOLVED IN: alanyl-tRNA aminoacylation; LOCATED IN: mitochondrion, chloroplast; EXPRESSED IN: 24 plant structures; EXPRESSED DURI…
'29.1.7'	'protein.aa activation.alanine-tRNA ligase'	HORVU1Hr1G053280,5	-10.2935	0	'(loc_os10g10244.1 : 541.0) no description available & (at1g50200 : 434.0) Alanyl-tRNA synthetase (ALATS); FUNCTIONS IN: alanine-tRNA ligase activity, ligase activity, forming aminoacyl-tRNA and related compounds, nucleotide binding, ATP binding, nucleic acid binding; INVOLVED IN: alanyl-tRNA aminoacylation; LOCATED IN: mitochondrion, chloroplast; EXPRESSED IN: 24 plant structures; EXPRESSED DURI…
'29.1.7'	'protein.aa activation.alanine-tRNA ligase'	HORVU2Hr1G010870,13	-13.773	0	'(loc_os10g10244.1 : 1035.0) no description available & (at1g50200 : 849.0) Alanyl-tRNA synthetase (ALATS); FUNCTIONS IN: alanine-tRNA ligase activity, ligase activity, forming aminoacyl-tRNA and related compounds, nucleotide binding, ATP binding, nucleic acid binding; INVOLVED IN: alanyl-tRNA aminoacylation; LOCATED IN: mitochondrion, chloroplast; EXPRESSED IN: 24 plant structures; EXPRESSED DUR…
'29.1.7'	'protein.aa activation.alanine-tRNA ligase'	HORVU2Hr1G031130,15	-10.6375	0	'(loc_os10g10244.1 : 456.0) no description available & (at1g50200 : 356.0) Alanyl-tRNA synthetase (ALATS); FUNCTIONS IN: alanine-tRNA ligase activity, ligase activity, forming aminoacyl-tRNA and related compounds, nucleotide binding, ATP binding, nucleic acid binding; INVOLVED IN: alanyl-tRNA aminoacylation; LOCATED IN: mitochondrion, chloroplast; EXPRESSED IN: 24 plant structures; EXPRESSED DURI…
'29.1.7'	'protein.aa activation.alanine-tRNA ligase'	HORVU2Hr1G086240,5	-12.1904	0	'(loc_os10g10244.1 : 682.0) no description available & (at1g50200 : 534.0) Alanyl-tRNA synthetase (ALATS); FUNCTIONS IN: alanine-tRNA ligase activity, ligase activity, forming aminoacyl-tRNA and related compounds, nucleotide binding, ATP binding, nucleic acid binding; INVOLVED IN: alanyl-tRNA aminoacylation; LOCATED IN: mitochondrion, chloroplast; EXPRESSED IN: 24 plant structures; EXPRESSED DURI…
'29.1.7'	'protein.aa activation.alanine-tRNA ligase'	HORVU3Hr1G062590,2	-12.3194	0	'(loc_os10g10244.1 : 1527.0) no description available & (at1g50200 : 1235.0) Alanyl-tRNA synthetase (ALATS); FUNCTIONS IN: alanine-tRNA ligase activity, ligase activity, forming aminoacyl-tRNA and related compounds, nucleotide binding, ATP binding, nucleic acid binding; INVOLVED IN: alanyl-tRNA aminoacylation; LOCATED IN: mitochondrion, chloroplast; EXPRESSED IN: 24 plant structures; EXPRESSED DU…
'29.1.7'	'protein.aa activation.alanine-tRNA ligase'	HORVU4Hr1G050630,3	-10.4717	1.18551e-135	'(loc_os10g10244.1 : 775.0) no description available & (at1g50200 : 587.0) Alanyl-tRNA synthetase (ALATS); FUNCTIONS IN: alanine-tRNA ligase activity, ligase activity, forming aminoacyl-tRNA and related compounds, nucleotide binding, ATP binding, nucleic acid binding; INVOLVED IN: alanyl-tRNA aminoacylation; LOCATED IN: mitochondrion, chloroplast; EXPRESSED IN: 24 plant structures; EXPRESSED DURI…
'29.1.7'	'protein.aa activation.alanine-tRNA ligase'	HORVU4Hr1G061500,3	-10.2348	0	'(loc_os10g10244.1 : 775.0) no description available & (at1g50200 : 587.0) Alanyl-tRNA synthetase (ALATS); FUNCTIONS IN: alanine-tRNA ligase activity, ligase activity, forming aminoacyl-tRNA and related compounds, nucleotide binding, ATP binding, nucleic acid binding; INVOLVED IN: alanyl-tRNA aminoacylation; LOCATED IN: mitochondrion, chloroplast; EXPRESSED IN: 24 plant structures; EXPRESSED DURI…
'29.1.7'	'protein.aa activation.alanine-tRNA ligase'	HORVU5Hr1G106440,4	-10.9381	1.17242e-222	'(loc_os10g10244.1 : 717.0) no description available & (at1g50200 : 618.0) Alanyl-tRNA synthetase (ALATS); FUNCTIONS IN: alanine-tRNA ligase activity, ligase activity, forming aminoacyl-tRNA and related compounds, nucleotide binding, ATP binding, nucleic acid binding; INVOLVED IN: alanyl-tRNA aminoacylation; LOCATED IN: mitochondrion, chloroplast; EXPRESSED IN: 24 plant structures; EXPRESSED DURI…
'29.1.7'	'protein.aa activation.alanine-tRNA ligase'	HORVU5Hr1G116580,8	-12.5635	0	'(loc_os10g10244.1 : 1234.0) no description available & (at1g50200 : 1023.0) Alanyl-tRNA synthetase (ALATS); FUNCTIONS IN: alanine-tRNA ligase activity, ligase activity, forming aminoacyl-tRNA and related compounds, nucleotide binding, ATP binding, nucleic acid binding; INVOLVED IN: alanyl-tRNA aminoacylation; LOCATED IN: mitochondrion, chloroplast; EXPRESSED IN: 24 plant structures; EXPRESSED DU…
'29.1.7'	'protein.aa activation.alanine-tRNA ligase'	HORVU6Hr1G005390,2	-10.3332	0	'(loc_os10g10244.1 : 814.0) no description available & (at1g50200 : 621.0) Alanyl-tRNA synthetase (ALATS); FUNCTIONS IN: alanine-tRNA ligase activity, ligase activity, forming aminoacyl-tRNA and related compounds, nucleotide binding, ATP binding, nucleic acid binding; INVOLVED IN: alanyl-tRNA aminoacylation; LOCATED IN: mitochondrion, chloroplast; EXPRESSED IN: 24 plant structures; EXPRESSED DURI…
'29.1.7'	'protein.aa activation.alanine-tRNA ligase'	HORVU7Hr1G062190,1	-10.4336	1.52187e-49	'(loc_os10g10244.1 : 816.0) no description available & (at1g50200 : 621.0) Alanyl-tRNA synthetase (ALATS); FUNCTIONS IN: alanine-tRNA ligase activity, ligase activity, forming aminoacyl-tRNA and related compounds, nucleotide binding, ATP binding, nucleic acid binding; INVOLVED IN: alanyl-tRNA aminoacylation; LOCATED IN: mitochondrion, chloroplast; EXPRESSED IN: 24 plant structures; EXPRESSED DURI…
'29.2'	'protein.synthesis'	HORVU4Hr1G008750,11	-9.79116	0	'(at1g64790 : 1377.0) ILITYHIA (ILA) is a HEAT repeat protein involved in plant immunity. The gene is also involved in systemic acquired resistance induced by P. syringae expressing avrRps4. Loss-of-function mutants of ILA caused pleiotropic defects in the mutant plants. The mutant plants are smaller in size and the leaves are serrated and yellow to light green in color.; ILITYHIA (ILA); FUNCTION…
'29.2.1.2.1.11'	'protein.synthesis.ribosomal protein.eukaryotic.40S subunit.S11'	HORVU2Hr1G099230,6	-9.9629	2.00038e-75	'(loc_os08g10608.1 : 300.0) no description available & (p25460|rs11_maize : 296.0) 40S ribosomal protein S11 - Zea mays (Maize) & (at5g23740 : 282.0) Encodes a putative ribosomal protein S11 (RPS11-beta).; ribosomal protein S11-beta (RPS11-BETA); FUNCTIONS IN: structural constituent of ribosome; INVOLVED IN: translation; LOCATED IN: cytosolic small ribosomal subunit, membrane; EXPRESSED IN: 22 pl…
'29.2.1.2.1.11'	'protein.synthesis.ribosomal protein.eukaryotic.40S subunit.S11'	HORVU6Hr1G056610,6	-9.59432	1.66748e-73	'(loc_os04g42380.1 : 296.0) no description available & (p25460|rs11_maize : 285.0) 40S ribosomal protein S11 - Zea mays (Maize) & (at3g48930 : 280.0) embryo defective 1080 (EMB1080); FUNCTIONS IN: structural constituent of ribosome; INVOLVED IN: translation, embryo development ending in seed dormancy; LOCATED IN: cytosolic small ribosomal subunit, cytosolic ribosome, cell wall, membrane; EXPRESSE…
'29.2.1.2.1.23'	'protein.synthesis.ribosomal protein.eukaryotic.40S subunit.S23'	HORVU3Hr1G027730,3	-10.6357	0	'(loc_os03g60400.1 : 289.0) no description available & (p46297|rs23_fraan : 280.0) 40S ribosomal protein S23 (S12) - Fragaria ananassa (Strawberry) & (at5g02960 : 276.0) Ribosomal protein S12/S23 family protein; FUNCTIONS IN: structural constituent of ribosome; INVOLVED IN: translation; LOCATED IN: cytosolic small ribosomal subunit, cytosolic ribosome, ribosome; EXPRESSED IN: guard cell, leaf; CO…
'29.2.1.2.1.23'	'protein.synthesis.ribosomal protein.eukaryotic.40S subunit.S23'	HORVU3Hr1G037050,5	-10.3772	7.40152e-100	'(loc_os03g60400.1 : 285.0) no description available & (p46297|rs23_fraan : 275.0) 40S ribosomal protein S23 (S12) - Fragaria ananassa (Strawberry) & (at5g02960 : 271.0) Ribosomal protein S12/S23 family protein; FUNCTIONS IN: structural constituent of ribosome; INVOLVED IN: translation; LOCATED IN: cytosolic small ribosomal subunit, cytosolic ribosome, ribosome; EXPRESSED IN: guard cell, leaf; CO…
'29.2.1.2.1.23'	'protein.synthesis.ribosomal protein.eukaryotic.40S subunit.S23'	HORVU4Hr1G050280,9	-11.713	7.03446e-239	'(loc_os03g60400.1 : 113.0) no description available & (p46297|rs23_fraan : 105.0) 40S ribosomal protein S23 (S12) - Fragaria ananassa (Strawberry) & (at5g02960 : 102.0) Ribosomal protein S12/S23 family protein; FUNCTIONS IN: structural constituent of ribosome; INVOLVED IN: translation; LOCATED IN: cytosolic small ribosomal subunit, cytosolic ribosome, ribosome; EXPRESSED IN: guard cell, leaf; CO…
'29.2.1.2.1.23'	'protein.synthesis.ribosomal protein.eukaryotic.40S subunit.S23'	HORVU5Hr1G046490,15	-12.1512	0	'(loc_os03g60400.1 : 285.0) no description available & (p46297|rs23_fraan : 275.0) 40S ribosomal protein S23 (S12) - Fragaria ananassa (Strawberry) & (at5g02960 : 271.0) Ribosomal protein S12/S23 family protein; FUNCTIONS IN: structural constituent of ribosome; INVOLVED IN: translation; LOCATED IN: cytosolic small ribosomal subunit, cytosolic ribosome, ribosome; EXPRESSED IN: guard cell, leaf; CO…
'29.2.1.2.1.31'	'protein.synthesis.ribosomal protein.eukaryotic.40S subunit.SA'	HORVU3Hr1G026020,5	-11.2691	0	'(loc_os03g08440.2 : 194.0) no description available & (o22518|rssa_soybn : 186.0) 40S ribosomal protein SA (p40) - Glycine max (Soybean) & (at3g04770 : 178.0) 40s ribosomal protein SA B (RPSAb); FUNCTIONS IN: structural constituent of ribosome; INVOLVED IN: translation; LOCATED IN: cytosolic small ribosomal subunit, cytosolic ribosome, chloroplast, membrane; EXPRESSED IN: 25 plant structures; EX…
'29.2.1.2.1.31'	'protein.synthesis.ribosomal protein.eukaryotic.40S subunit.SA'	HORVU6Hr1G077100,4	-10.446	9.05666e-132	'(loc_os03g08440.1 : 476.0) no description available & (o22518|rssa_soybn : 424.0) 40S ribosomal protein SA (p40) - Glycine max (Soybean) & (at1g72370 : 399.0) acidic protein associated to 40S ribosomal subunit of ribosomes. Involved in polysome formation during active protein synthesis. Expressed in actively growing tissue.; 40s ribosomal protein SA (P40); FUNCTIONS IN: structural constituent of…
'29.2.1.2.1.31'	'protein.synthesis.ribosomal protein.eukaryotic.40S subunit.SA'	HORVU7Hr1G008690,24	-10.7674	9.46574e-176	'(loc_os03g08440.2 : 469.0) no description available & (o22518|rssa_soybn : 424.0) 40S ribosomal protein SA (p40) - Glycine max (Soybean) & (at1g72370 : 399.0) acidic protein associated to 40S ribosomal subunit of ribosomes. Involved in polysome formation during active protein synthesis. Expressed in actively growing tissue.; 40s ribosomal protein SA (P40); FUNCTIONS IN: structural constituent of…
'29.2.1.2.1.53'	'protein.synthesis.ribosomal protein.eukaryotic.40S subunit.S3A'	HORVU4Hr1G052200,4	-10.2866	0	'(loc_os12g21798.1 : 270.0) no description available & (p49397|rs3a_orysa : 266.0) 40S ribosomal protein S3a (CYC07 protein) - Oryza sativa (Rice) & (at4g34670 : 246.0) Ribosomal protein S3Ae; FUNCTIONS IN: structural constituent of ribosome; INVOLVED IN: translation; LOCATED IN: in 6 components; EXPRESSED IN: 23 plant structures; EXPRESSED DURING: 13 growth stages; CONTAINS InterPro DOMAIN/s: Ri…
'29.2.1.2.1.53'	'protein.synthesis.ribosomal protein.eukaryotic.40S subunit.S3A'	HORVU5Hr1G014980,16	-11.8956	0	'(loc_os12g21798.1 : 373.0) no description available & (p49397|rs3a_orysa : 368.0) 40S ribosomal protein S3a (CYC07 protein) - Oryza sativa (Rice) & (at4g34670 : 336.0) Ribosomal protein S3Ae; FUNCTIONS IN: structural constituent of ribosome; INVOLVED IN: translation; LOCATED IN: in 6 components; EXPRESSED IN: 23 plant structures; EXPRESSED DURING: 13 growth stages; CONTAINS InterPro DOMAIN/s: Ri…
'29.2.1.2.1.53'	'protein.synthesis.ribosomal protein.eukaryotic.40S subunit.S3A'	HORVU6Hr1G006880,4	-10.2538	3.28852e-191	'(loc_os12g21798.1 : 432.0) no description available & (p49397|rs3a_orysa : 427.0) 40S ribosomal protein S3a (CYC07 protein) - Oryza sativa (Rice) & (at4g34670 : 398.0) Ribosomal protein S3Ae; FUNCTIONS IN: structural constituent of ribosome; INVOLVED IN: translation; LOCATED IN: in 6 components; EXPRESSED IN: 23 plant structures; EXPRESSED DURING: 13 growth stages; CONTAINS InterPro DOMAIN/s: Ri…
'29.2.1.2.1.53'	'protein.synthesis.ribosomal protein.eukaryotic.40S subunit.S3A'	HORVU6Hr1G077210,6	-10.7074	9.01158e-205	'(loc_os12g21798.1 : 376.0) no description available & (p49397|rs3a_orysa : 372.0) 40S ribosomal protein S3a (CYC07 protein) - Oryza sativa (Rice) & (at4g34670 : 345.0) Ribosomal protein S3Ae; FUNCTIONS IN: structural constituent of ribosome; INVOLVED IN: translation; LOCATED IN: in 6 components; EXPRESSED IN: 23 plant structures; EXPRESSED DURING: 13 growth stages; CONTAINS InterPro DOMAIN/s: Ri…
'29.2.1.2.1.6'	'protein.synthesis.ribosomal protein.eukaryotic.40S subunit.S6'	HORVU1Hr1G038680,18	-11.0112	0	'(loc_os07g42950.1 : 296.0) no description available & (at5g10360 : 288.0) RPS6A and RPS6B are fully redundant and essential during gametogenesis.; embryo defective 3010 (EMB3010); CONTAINS InterPro DOMAIN/s: Ribosomal protein S6e (InterPro:IPR001377), Ribosomal protein S6e, conserved site (InterPro:IPR018282); BEST Arabidopsis thaliana protein match is: ribosomal protein S6 (TAIR:AT4G31700.1). &…
'29.2.1.2.1.6'	'protein.synthesis.ribosomal protein.eukaryotic.40S subunit.S6'	HORVU1Hr1G094900,11	-10.9337	0	'(loc_os07g42950.1 : 227.0) no description available & (at5g10360 : 224.0) RPS6A and RPS6B are fully redundant and essential during gametogenesis.; embryo defective 3010 (EMB3010); CONTAINS InterPro DOMAIN/s: Ribosomal protein S6e (InterPro:IPR001377), Ribosomal protein S6e, conserved site (InterPro:IPR018282); BEST Arabidopsis thaliana protein match is: ribosomal protein S6 (TAIR:AT4G31700.1). &…
'29.2.1.2.1.6'	'protein.synthesis.ribosomal protein.eukaryotic.40S subunit.S6'	HORVU2Hr1G022340,7	-11.4284	0	'(loc_os03g27260.1 : 361.0) no description available & (q9m3v8|rs6_aspof : 351.0) 40S ribosomal protein S6 - Asparagus officinalis (Garden asparagus) & (at5g10360 : 350.0) RPS6A and RPS6B are fully redundant and essential during gametogenesis.; embryo defective 3010 (EMB3010); CONTAINS InterPro DOMAIN/s: Ribosomal protein S6e (InterPro:IPR001377), Ribosomal protein S6e, conserved site (InterPro:I…
'29.2.1.2.1.6'	'protein.synthesis.ribosomal protein.eukaryotic.40S subunit.S6'	HORVU3Hr1G049120,11	-11.0021	0	'(loc_os03g27260.1 : 362.0) no description available & (q9m3v8|rs6_aspof : 352.0) 40S ribosomal protein S6 - Asparagus officinalis (Garden asparagus) & (at5g10360 : 351.0) RPS6A and RPS6B are fully redundant and essential during gametogenesis.; embryo defective 3010 (EMB3010); CONTAINS InterPro DOMAIN/s: Ribosomal protein S6e (InterPro:IPR001377), Ribosomal protein S6e, conserved site (InterPro:I…
'29.2.1.2.1.6'	'protein.synthesis.ribosomal protein.eukaryotic.40S subunit.S6'	HORVU4Hr1G003100,3	-10.4788	0	'(loc_os07g42950.1 : 296.0) no description available & (at5g10360 : 288.0) RPS6A and RPS6B are fully redundant and essential during gametogenesis.; embryo defective 3010 (EMB3010); CONTAINS InterPro DOMAIN/s: Ribosomal protein S6e (InterPro:IPR001377), Ribosomal protein S6e, conserved site (InterPro:IPR018282); BEST Arabidopsis thaliana protein match is: ribosomal protein S6 (TAIR:AT4G31700.1). &…
'29.2.1.2.1.6'	'protein.synthesis.ribosomal protein.eukaryotic.40S subunit.S6'	HORVU5Hr1G042600,3	-10.3117	0	'(loc_os03g27260.1 : 366.0) no description available & (q9m3v8|rs6_aspof : 356.0) 40S ribosomal protein S6 - Asparagus officinalis (Garden asparagus) & (at5g10360 : 355.0) RPS6A and RPS6B are fully redundant and essential during gametogenesis.; embryo defective 3010 (EMB3010); CONTAINS InterPro DOMAIN/s: Ribosomal protein S6e (InterPro:IPR001377), Ribosomal protein S6e, conserved site (InterPro:I…
'29.2.1.2.1.6'	'protein.synthesis.ribosomal protein.eukaryotic.40S subunit.S6'	HORVU5Hr1G047790,3	-11.3219	0	'(loc_os03g27260.1 : 363.0) no description available & (q9m3v8|rs6_aspof : 353.0) 40S ribosomal protein S6 - Asparagus officinalis (Garden asparagus) & (at5g10360 : 352.0) RPS6A and RPS6B are fully redundant and essential during gametogenesis.; embryo defective 3010 (EMB3010); CONTAINS InterPro DOMAIN/s: Ribosomal protein S6e (InterPro:IPR001377), Ribosomal protein S6e, conserved site (InterPro:I…
'29.2.1.2.1.6'	'protein.synthesis.ribosomal protein.eukaryotic.40S subunit.S6'	HORVU6Hr1G053250,6	-10.6591	2.83476e-152	'(loc_os03g27260.1 : 81.6) no description available & (at5g10360 : 80.5) RPS6A and RPS6B are fully redundant and essential during gametogenesis.; embryo defective 3010 (EMB3010); CONTAINS InterPro DOMAIN/s: Ribosomal protein S6e (InterPro:IPR001377), Ribosomal protein S6e, conserved site (InterPro:IPR018282); BEST Arabidopsis thaliana protein match is: ribosomal protein S6 (TAIR:AT4G31700.1). & (…
'29.2.1.2.1.6'	'protein.synthesis.ribosomal protein.eukaryotic.40S subunit.S6'	HORVU7Hr1G032070,4	-10.7091	9.87312e-222	'(loc_os07g42950.1 : 278.0) no description available & (at5g10360 : 269.0) RPS6A and RPS6B are fully redundant and essential during gametogenesis.; embryo defective 3010 (EMB3010); CONTAINS InterPro DOMAIN/s: Ribosomal protein S6e (InterPro:IPR001377), Ribosomal protein S6e, conserved site (InterPro:IPR018282); BEST Arabidopsis thaliana protein match is: ribosomal protein S6 (TAIR:AT4G31700.1). &…
'29.2.1.2.1.6'	'protein.synthesis.ribosomal protein.eukaryotic.40S subunit.S6'	HORVU7Hr1G093060,23	-10.3129	1.67932e-256	'(loc_os03g27260.1 : 362.0) no description available & (q9m3v8|rs6_aspof : 352.0) 40S ribosomal protein S6 - Asparagus officinalis (Garden asparagus) & (at5g10360 : 351.0) RPS6A and RPS6B are fully redundant and essential during gametogenesis.; embryo defective 3010 (EMB3010); CONTAINS InterPro DOMAIN/s: Ribosomal protein S6e (InterPro:IPR001377), Ribosomal protein S6e, conserved site (InterPro:I…
'29.2.2.1'	'protein.synthesis.ribosome biogenesis.export from nucleus'	HORVU3Hr1G090460,11	-9.82655	0	'(loc_os01g66520.1 : 365.0) no description available & (at3g51270 : 252.0) protein serine/threonine kinases;ATP binding;catalytics; FUNCTIONS IN: protein serine/threonine kinase activity, catalytic activity, ATP binding; INVOLVED IN: protein amino acid phosphorylation; LOCATED IN: cellular_component unknown; EXPRESSED IN: 21 plant structures; EXPRESSED DURING: 13 growth stages; CONTAINS InterPro …
'29.2.2.2.1'	'protein.synthesis.ribosome biogenesis.Assembly factors.DExD-box helicases'	HORVU1Hr1G004510,6	-9.67243	0	'(loc_os05g01990.1 : 929.0) no description available & (at2g40700 : 670.0) P-loop containing nucleoside triphosphate hydrolases superfamily protein; FUNCTIONS IN: helicase activity, ATP binding, ATP-dependent helicase activity, nucleic acid binding; EXPRESSED IN: 23 plant structures; EXPRESSED DURING: 13 growth stages; CONTAINS InterPro DOMAIN/s: RNA helicase, DEAD-box type, Q motif (InterPro:IPR…
'29.2.2.3.1'	'protein.synthesis.ribosome biogenesis.Pre-rRNA processing and modifications.snoRNPs'	HORVU2Hr1G027400,4	-9.67596	1.42237e-152	'(loc_os07g44190.1 : 765.0) no description available & (at3g57150 : 686.0) Encodes a putative pseudouridine synthase (NAP57).; homologue of NAP57 (NAP57); FUNCTIONS IN: pseudouridine synthase activity; INVOLVED IN: pseudouridine synthesis, RNA modification, RNA processing; LOCATED IN: cytosol, nucleolus; EXPRESSED IN: 24 plant structures; EXPRESSED DURING: 13 growth stages; CONTAINS InterPro DOMA…
'29.2.2.3.4'	'protein.synthesis.ribosome biogenesis.Pre-rRNA processing and modifications.WD-repeat proteins'	HORVU5Hr1G105970,7	-10.0593	1.38716e-172	'(loc_os07g41190.1 : 797.0) no description available & (at5g14050 : 581.0) Transducin/WD40 repeat-like superfamily protein; FUNCTIONS IN: nucleotide binding; INVOLVED IN: biological_process unknown; LOCATED IN: CUL4 RING ubiquitin ligase complex; EXPRESSED IN: 22 plant structures; EXPRESSED DURING: 13 growth stages; CONTAINS InterPro DOMAIN/s: WD40 repeat 2 (InterPro:IPR019782), WD40 repeat-like-…
'29.2.3'	'protein.synthesis.initiation'	HORVU4Hr1G049090,1	-9.9629	3.9706e-184	'(loc_os03g22570.2 : 1456.0) no description available & (at2g13540 : 984.0) Encodes a nuclear cap-binding protein that forms a heterodimeric complex with CBP20 and is involved in ABA signaling and flowering. Mutants are early flowering and exhibit hypersensitive response to ABA in germination inhibition.Loss of ABH1 function results in abnormal processing of mRNAs for several important floral reg…
'29.2.3'	'protein.synthesis.initiation'	HORVU6Hr1G012010,3	-9.86419	8.60618e-50	'(loc_os02g02990.1 : 233.0) no description available & (at1g66070 : 144.0) Translation initiation factor eIF3 subunit; FUNCTIONS IN: molecular_function unknown; INVOLVED IN: biological_process unknown; EXPRESSED IN: 23 plant structures; EXPRESSED DURING: 13 growth stages; CONTAINS InterPro DOMAIN/s: Translation initiation factor eIF3 subunit (InterPro:IPR013906); BEST Arabidopsis thaliana protein…
'29.3.3'	'protein.targeting.chloroplast'	HORVU1Hr1G043940,6	-9.64746	5.07718e-39	'(loc_os10g35010.1 : 985.0) no description available & (at1g06950 : 680.0) Encodes a protein thought to be a part of the translocon at the chloroplast inner envelope. Involved in protein import into the chloroplast and chloroplast biogenesis.; translocon at the inner envelope membrane of chloroplasts 110 (TIC110); INVOLVED IN: protein import into chloroplast stroma, chloroplast organization; LOCA…
'29.3.3'	'protein.targeting.chloroplast'	HORVU3Hr1G043930,5	-9.64386	1.46882e-98	'(loc_os01g31680.2 : 376.0) no description available & (at2g01110 : 350.0) mutant is Albino and pale green; Chloroplast Protein Translocation (tatC). Core subunit of the chloroplast Tat translocase. Integral chloroplast thylakoid membrane protein.; ALBINO AND PALE GREEN 2 (APG2); FUNCTIONS IN: proton motive force dependent protein transmembrane transporter activity; INVOLVED IN: thylakoid membran…
'29.3.4.2'	'protein.targeting.secretory pathway.golgi'	HORVU6Hr1G063210,2	-9.63844	2.06074e-189	'(loc_os02g44111.1 : 421.0) no description available & (at3g24315 : 256.0) AtSec20; CONTAINS InterPro DOMAIN/s: Sec20 (InterPro:IPR005606); Has 291 Blast hits to 291 proteins in 130 species: Archae - 0; Bacteria - 0; Metazoa - 136; Fungi - 95; Plants - 46; Viruses - 0; Other Eukaryotes - 14 (source: NCBI BLink). & (reliability: 512.0) & (original description: no original description)'
'29.4'	'protein.postranslational modification'	HORVU1Hr1G088510,13	-10.1007	1.36601e-81	'(q67c40|mpk7_orysa : 773.0) Mitogen-activated protein kinase 7 (EC 2.7.11.24) (MAP kinase 7) (OsMAPK6) (MAP kinase 6) - Oryza sativa (Rice) & (loc_os05g49140.2 : 773.0) no description available & (at2g42880 : 645.0) member of MAP Kinase; MAP kinase 20 (MPK20); CONTAINS InterPro DOMAIN/s: Protein kinase, ATP binding site (InterPro:IPR017441), MAP kinase, conserved site (InterPro:IPR003527), Prote…
'29.4'	'protein.postranslational modification'	HORVU2Hr1G083850,3	-9.93664	1.39757e-87	'(loc_os04g40860.1 : 905.0) no description available & (at1g13460 : 687.0) Encodes protein phosphatase 2A (PP2A) B'theta subunit. Targeted to peroxisomes.; Protein phosphatase 2A regulatory B subunit family protein; FUNCTIONS IN: protein phosphatase type 2A regulator activity; INVOLVED IN: signal transduction; LOCATED IN: peroxisome, protein phosphatase type 2A complex; EXPRESSED IN: 21 plant str…
'29.4'	'protein.postranslational modification'	HORVU3Hr1G060390,16	-9.69697	6.23462e-72	'(loc_os01g47530.4 : 769.0) no description available & (q5sn53|mpk8_orysa : 765.0) Mitogen-activated protein kinase 8 (EC 2.7.11.24) (MAP kinase 8) (OsWJUMK1) (Wound- and JA-uninducible MAP kinase 1) - Oryza sativa (Rice) & (at2g42880 : 699.0) member of MAP Kinase; MAP kinase 20 (MPK20); CONTAINS InterPro DOMAIN/s: Protein kinase, ATP binding site (InterPro:IPR017441), MAP kinase, conserved site …
'29.4'	'protein.postranslational modification'	HORVU5Hr1G018340,2	-9.92778	0	'(q75v57|sapk9_orysa : 350.0) Serine/threonine-protein kinase SAPK9 (EC 2.7.11.1) (Osmotic stress/abscisic acid-activated protein kinase 9) - Oryza sativa (Rice) & (loc_os12g39630.1 : 350.0) no description available & (at4g33950 : 335.0) Encodes calcium-independent ABA-activated protein kinase, a member of SNF1-related protein kinases (SnRK2) whose activity is activated by ionic (salt) and non-io…
'29.4'	'protein.postranslational modification'	HORVU7Hr1G082710,5	-9.99152	0	'(loc_os06g27760.1 : 110.0) no description available & (at1g53670 : 103.0) methionine sulfoxide reductase B 1 (MSRB1); FUNCTIONS IN: peptide-methionine-(S)-S-oxide reductase activity; INVOLVED IN: response to oxidative stress; LOCATED IN: chloroplast; EXPRESSED IN: 23 plant structures; EXPRESSED DURING: 13 growth stages; CONTAINS InterPro DOMAIN/s: Methionine sulphoxide reductase B (InterPro:IPR0…
'29.4'	'protein.postranslational modification'	HORVU7Hr1G113110,1	-10.1344	8.7846e-164	'(loc_os06g44210.2 : 451.0) no description available & (at4g31860 : 382.0) Protein phosphatase 2C family protein; FUNCTIONS IN: protein serine/threonine phosphatase activity, catalytic activity; INVOLVED IN: protein amino acid dephosphorylation; LOCATED IN: plasma membrane; EXPRESSED IN: 24 plant structures; EXPRESSED DURING: 15 growth stages; CONTAINS InterPro DOMAIN/s: Protein phosphatase 2C, m…
'29.4.1.57'	'protein.postranslational modification.kinase.receptor like cytoplasmatic kinase VII'	HORVU1Hr1G004690,3	-9.71425	0	'(loc_os05g02020.2 : 406.0) no description available & (at1g07570 : 363.0) Protein kinase capable of phosphorylating tyrosine, serine, and threonine residues; APK1A; FUNCTIONS IN: protein serine/threonine kinase activity, kinase activity; INVOLVED IN: protein amino acid phosphorylation; EXPRESSED IN: 20 plant structures; EXPRESSED DURING: 8 growth stages; CONTAINS InterPro DOMAIN/s: Protein kinas…
'29.5'	'protein.degradation'	HORVU3Hr1G068660,7	-9.87191	4.93052e-237	'(q9lsu2|psa2_orysa : 388.0) Proteasome subunit alpha type 2 (EC 3.4.25.1) (20S proteasome alpha subunit B) (20S proteasome subunit alpha-2) - Oryza sativa (Rice) & (loc_os03g26970.1 : 388.0) no description available & (at1g16470 : 372.0) Encodes 20S proteasome subunit PAB1 (PAB1).; proteasome subunit PAB1 (PAB1); FUNCTIONS IN: peptidase activity, endopeptidase activity, threonine-type endopeptid…
'29.5'	'protein.degradation'	HORVU7Hr1G108960,21	-10.2107	8.66628e-204	'(loc_os06g45480.2 : 260.0) no description available & (at4g20070 : 209.0) The gene encoding Arabidopsis thaliana Allantoate Amidohydrolase (AtAAH)which catalyzes the allantoate deiminase reaction (EC 3.5.3.9)is expressed in all parts of the plant being consistent with a function in purine turnover in Arabidopsis.; allantoate amidohydrolase (AAH); CONTAINS InterPro DOMAIN/s: Peptidase M20 (InterP…
'29.5.11'	'protein.degradation.ubiquitin'	HORVU1Hr1G052260,5	-9.98014	5.18244e-153	'(loc_os10g39620.2 : 464.0) no description available & (at2g17200 : 221.0) DSK2; CONTAINS InterPro DOMAIN/s: Heat shock chaperonin-binding (InterPro:IPR006636), Ubiquitin-associated/translation elongation factor EF1B, N-terminal (InterPro:IPR000449), Ubiquitin-associated/translation elongation factor EF1B, N-terminal, eukaryote (InterPro:IPR015940), Ubiquilin (InterPro:IPR015496), Ubiquitin (Inte…
'29.5.11'	'protein.degradation.ubiquitin'	HORVU2Hr1G058700,23	-9.59991	1.50075e-253	'(at5g06600 : 394.0) Encodes a ubiquitin-specific protease.; ubiquitin-specific protease 12 (UBP12); FUNCTIONS IN: ubiquitin-specific protease activity, ubiquitin thiolesterase activity; INVOLVED IN: ubiquitin-dependent protein catabolic process; LOCATED IN: cellular_component unknown; EXPRESSED IN: 25 plant structures; EXPRESSED DURING: 14 growth stages; CONTAINS InterPro DOMAIN/s: TRAF-like (In…
'29.5.11'	'protein.degradation.ubiquitin'	HORVU2Hr1G058700,29	-9.79279	3.75434e-175	'(at5g06600 : 394.0) Encodes a ubiquitin-specific protease.; ubiquitin-specific protease 12 (UBP12); FUNCTIONS IN: ubiquitin-specific protease activity, ubiquitin thiolesterase activity; INVOLVED IN: ubiquitin-dependent protein catabolic process; LOCATED IN: cellular_component unknown; EXPRESSED IN: 25 plant structures; EXPRESSED DURING: 14 growth stages; CONTAINS InterPro DOMAIN/s: TRAF-like (In…
'29.5.11'	'protein.degradation.ubiquitin'	HORVU3Hr1G031730,7	-9.68299	0	'(loc_os01g13170.1 : 492.0) no description available & (at1g53025 : 298.0) Ubiquitin-conjugating enzyme family protein; FUNCTIONS IN: small conjugating protein ligase activity; INVOLVED IN: regulation of protein metabolic process, post-translational protein modification; CONTAINS InterPro DOMAIN/s: Ubiquitin-conjugating enzyme/RWD-like (InterPro:IPR016135), Ubiquitin-conjugating enzyme, E2 (Inter…
'29.5.11'	'protein.degradation.ubiquitin'	HORVU4Hr1G074360,5	-9.71253	0	'(loc_os03g06950.1 : 1535.0) no description available & (at3g47910 : 910.0) Ubiquitin carboxyl-terminal hydrolase-related protein; FUNCTIONS IN: ubiquitin thiolesterase activity, zinc ion binding; INVOLVED IN: ubiquitin-dependent protein catabolic process; LOCATED IN: intracellular; EXPRESSED IN: cultured cell; CONTAINS InterPro DOMAIN/s: Protein of unknown function DUF627 (InterPro:IPR006866), P…
'29.5.11'	'protein.degradation.ubiquitin'	HORVU3Hr1G004520,14	-10.2058	9.06314e-95	'(loc_os01g03520.1 : 1594.0) no description available & (at2g16920 : 917.0) ubiquitin-conjugating enzyme 23 (UBC23); FUNCTIONS IN: ubiquitin-protein ligase activity, small conjugating protein ligase activity; INVOLVED IN: regulation of protein metabolic process, post-translational protein modification; LOCATED IN: cellular_component unknown; EXPRESSED IN: 24 plant structures; EXPRESSED DURING: 15…
'29.5.11'	'protein.degradation.ubiquitin'	HORVU7Hr1G108540,6	-10.2167	0	'(loc_os03g31400.1 : 1302.0) no description available & (at5g15400 : 1030.0) U-box domain-containing protein; FUNCTIONS IN: ubiquitin-protein ligase activity, ubiquitin-ubiquitin ligase activity; INVOLVED IN: protein ubiquitination, ubiquitin-dependent protein catabolic process; LOCATED IN: ubiquitin ligase complex; EXPRESSED IN: 23 plant structures; EXPRESSED DURING: 13 growth stages; CONTAINS I…
'29.5.11.20'	'protein.degradation.ubiquitin.proteasom'	HORVU5Hr1G065220,3	-9.57743	3.1388e-58	'(loc_os09g25310.1 : 335.0) no description available & (at5g57950 : 210.0) 26S proteasome regulatory subunit, putative; CONTAINS InterPro DOMAIN/s: PDZ/DHR/GLGF (InterPro:IPR001478); Has 30201 Blast hits to 17322 proteins in 780 species: Archae - 12; Bacteria - 1396; Metazoa - 17338; Fungi - 3422; Plants - 5037; Viruses - 0; Other Eukaryotes - 2996 (source: NCBI BLink). & (reliability: 420.0) & (…
'29.5.11.20'	'protein.degradation.ubiquitin.proteasom'	HORVU5Hr1G110330,3	-9.6865	0	'(loc_os06g06030.2 : 412.0) no description available & (at1g13060 : 382.0) Encodes 20S proteasome beta subunit PBE1 (PBE1).; 20S proteasome beta subunit E1 (PBE1); FUNCTIONS IN: peptidase activity, threonine-type endopeptidase activity; INVOLVED IN: ubiquitin-dependent protein catabolic process; LOCATED IN: proteasome core complex, proteasome complex; EXPRESSED IN: guard cell, pollen tube; EXPRES…
'29.5.11.20'	'protein.degradation.ubiquitin.proteasom'	HORVU5Hr1G122430,4	-9.90839	0	'(loc_os03g63430.2 : 383.0) no description available & (at5g09900 : 335.0) Encodes one of two isoforms for the 26S proteasome regulatory protein (RN) subunit RPN5. For many functions it acts redundantly with the paralogous gene RPN5b but also appears to exert independent effects.; EMBRYO DEFECTIVE 2107 (EMB2107); FUNCTIONS IN: molecular_function unknown; INVOLVED IN: multicellular organismal deve…
'29.5.11.20'	'protein.degradation.ubiquitin.proteasom'	HORVU5Hr1G122560,1	-9.91289	1.71656e-141	'(loc_os03g63430.1 : 796.0) no description available & (at5g09900 : 698.0) Encodes one of two isoforms for the 26S proteasome regulatory protein (RN) subunit RPN5. For many functions it acts redundantly with the paralogous gene RPN5b but also appears to exert independent effects.; EMBRYO DEFECTIVE 2107 (EMB2107); FUNCTIONS IN: molecular_function unknown; INVOLVED IN: multicellular organismal deve…
'29.5.11.4.2'	'protein.degradation.ubiquitin.E3.RING'	HORVU2Hr1G080910,15	-10.1033	0	'(loc_os02g37030.1 : 301.0) no description available & (at3g48070 : 149.0) RING/U-box superfamily protein; FUNCTIONS IN: zinc ion binding; LOCATED IN: chloroplast; EXPRESSED IN: 24 plant structures; EXPRESSED DURING: 15 growth stages; CONTAINS InterPro DOMAIN/s: Zinc finger, RING-type (InterPro:IPR001841); BEST Arabidopsis thaliana protein match is: RING/U-box superfamily protein (TAIR:AT5G62910.…
'29.5.11.4.2'	'protein.degradation.ubiquitin.E3.RING'	HORVU2Hr1G085060,6	-9.94983	5.71974e-276	'(loc_os04g41470.2 : 215.0) no description available & (at1g65430 : 205.0) ARIADNE 8 (ARI8); FUNCTIONS IN: ubiquitin-protein ligase activity; LOCATED IN: intracellular; EXPRESSED IN: 24 plant structures; EXPRESSED DURING: 15 growth stages; CONTAINS InterPro DOMAIN/s: Zinc finger, C6HC-type (InterPro:IPR002867), Zinc finger, RING-type (InterPro:IPR001841), Zinc finger, CCHC-type (InterPro:IPR00187…
'29.5.11.4.2'	'protein.degradation.ubiquitin.E3.RING'	HORVU3Hr1G014190,4	-9.783	3.55898e-91	'(loc_os02g55200.2 : 556.0) no description available & (at3g54360 : 424.0) zinc ion binding; FUNCTIONS IN: zinc ion binding; EXPRESSED IN: 23 plant structures; EXPRESSED DURING: 15 growth stages; CONTAINS InterPro DOMAIN/s: Zinc finger, RING-type, conserved site (InterPro:IPR017907), Zinc finger, RING-type (InterPro:IPR001841); Has 748 Blast hits to 691 proteins in 131 species: Archae - 16; Bacte…
'29.5.11.4.2'	'protein.degradation.ubiquitin.E3.RING'	HORVU0Hr1G008700,7	-10.1812	7.42458e-103	'(loc_os03g15000.1 : 540.0) no description available & (at3g09770 : 379.0) RING/U-box superfamily protein; FUNCTIONS IN: zinc ion binding; LOCATED IN: plasma membrane; EXPRESSED IN: 23 plant structures; EXPRESSED DURING: 15 growth stages; BEST Arabidopsis thaliana protein match is: RING/U-box superfamily protein (TAIR:AT5G03200.1); Has 7619 Blast hits to 4715 proteins in 450 species: Archae - 8; …
'29.5.11.4.3.1'	'protein.degradation.ubiquitin.E3.SCF.SKP'	HORVU7Hr1G002220,4	-9.66534	3.29948e-33	'(loc_os11g26910.1 : 128.0) no description available & (at1g20140 : 112.0) SKP1-like 4 (SK4); CONTAINS InterPro DOMAIN/s: E3 ubiquitin ligase, SCF complex, Skp subunit (InterPro:IPR016897), SKP1 component, dimerisation (InterPro:IPR016072), SKP1 component (InterPro:IPR001232), BTB/POZ fold (InterPro:IPR011333), SKP1 component, POZ (InterPro:IPR016073); BEST Arabidopsis thaliana protein match is: …
'29.5.11.4.3.2'	'protein.degradation.ubiquitin.E3.SCF.FBOX'	HORVU7Hr1G099010,3	-9.94837	4.72056e-138	'(q5z8k3|ado1_orysa : 1109.0) Adagio-like protein 1 - Oryza sativa (Rice) & (loc_os06g47890.2 : 1109.0) no description available & (at5g57360 : 925.0) Encodes clock-associated PAS protein ZTL; Also known as FKF1-like protein 2 or ADAGIO1(ADO1). A protein containing a PAS domain ZTL contributes to the plant fitness (carbon fixation, biomass) by influencing the circadian clock period. ZTL is the F-…
'29.5.3'	'protein.degradation.cysteine protease'	HORVU6Hr1G091360,5	-9.90539	0	'(loc_os02g57410.5 : 373.0) no description available & (at5g04250 : 272.0) Cysteine proteinases superfamily protein; FUNCTIONS IN: cysteine-type peptidase activity; INVOLVED IN: biological_process unknown; LOCATED IN: cellular_component unknown; EXPRESSED IN: 24 plant structures; EXPRESSED DURING: 15 growth stages; CONTAINS InterPro DOMAIN/s: Ovarian tumour, otubain (InterPro:IPR003323); BEST Ara…
'29.5.5'	'protein.degradation.serine protease'	HORVU1Hr1G051420,3	-9.66	8.96022e-92	'(loc_os10g43050.1 : 222.0) no description available & (at5g45390 : 187.0) One of several nuclear-encoded ClpPs (caseinolytic protease). Contains a highly conserved catalytic triad of Ser-type proteases (Ser-His-Asp). The name reflects nomenclature described in Adam et. al (2001).; CLP protease P4 (CLPP4); FUNCTIONS IN: serine-type endopeptidase activity; INVOLVED IN: chloroplast organization, re…
'29.5.5'	'protein.degradation.serine protease'	HORVU2Hr1G016000,3	-9.81698	2.60222e-153	'(p93648|lonh2_maize : 781.0) Lon protease homolog 2, mitochondrial precursor (EC 3.4.21.-) - Zea mays (Maize) & (loc_os07g48960.1 : 781.0) no description available & (at5g26860 : 724.0) Encodes a member of the Lon protease-like proteins (Lon1/At5g26860, Lon2/At5g47040, Lon3/At3g05780, Lon4/At3g05790). Lon is a multifunctional ATP-dependent protease which exists in bacteria, archaea and within or…
'29.5.5'	'protein.degradation.serine protease'	HORVU5Hr1G031470,7	-9.64926	1.62276e-247	'(loc_os12g12850.2 : 1565.0) no description available & (at5g50920 : 1389.0) Encodes a protein that is similar to ATP-dependent Clp protease ATP-binding subunit / ClpC. Involved in protein import into the chloroplast. May provide ATP source that drives the TIC (Translocon at the Inner envelope membrane of Chloroplasts) translocation machinery.; CLPC homologue 1 (CLPC1); FUNCTIONS IN: ATP-dependen…
'29.5.7'	'protein.degradation.metalloprotease'	HORVU1Hr1G072490,9	-10.1573	1.05139e-133	'(loc_os05g38400.3 : 1131.0) no description available & (at1g07510 : 1001.0) encodes an FtsH protease that is localized to the mitochondrion; FTSH protease 10 (ftsh10); FUNCTIONS IN: in 6 functions; INVOLVED IN: proteolysis, protein catabolic process; LOCATED IN: mitochondrion, chloroplast thylakoid membrane, plastid; EXPRESSED IN: 25 plant structures; EXPRESSED DURING: 15 growth stages; CONTAINS…
'30.1'	'signalling.in sugar and nutrient physiology'	HORVU2Hr1G028600,8	-10.446	7.5563e-168	'(loc_os08g37800.1 : 932.0) no description available & (q02723|rkin1_secce : 861.0) Carbon catabolite derepressing protein kinase (EC 2.7.11.1) - Secale cereale (Rye) & (at3g01090 : 751.0) encodes a SNF1-related protein kinase that physically interacts with SCF subunit SKP1/ASK1 and 20S proteosome subunit PAD1. It can also interact with PRL1 DWD-containing protein. Based on in vitro degradation a…
'30.1'	'signalling.in sugar and nutrient physiology'	HORVU3Hr1G086830,6	-10.6055	4.46344e-129	'(loc_os08g37800.1 : 867.0) no description available & (q02723|rkin1_secce : 791.0) Carbon catabolite derepressing protein kinase (EC 2.7.11.1) - Secale cereale (Rye) & (at3g01090 : 694.0) encodes a SNF1-related protein kinase that physically interacts with SCF subunit SKP1/ASK1 and 20S proteosome subunit PAD1. It can also interact with PRL1 DWD-containing protein. Based on in vitro degradation a…
'30.1'	'signalling.in sugar and nutrient physiology'	HORVU4Hr1G050700,4	-10.9915	1.35173e-199	'(loc_os03g17980.2 : 566.0) no description available & (at3g01090 : 495.0) encodes a SNF1-related protein kinase that physically interacts with SCF subunit SKP1/ASK1 and 20S proteosome subunit PAD1. It can also interact with PRL1 DWD-containing protein. Based on in vitro degradation assays and cul4cs and prl1 mutants, there is evidence that AKIN10 is degraded in a proteasome-dependent manner, and…
'30.1'	signalling.in sugar and nutrient physiology'	HORVU4Hr1G056610,8	-10.446	2.86994e-276	'(loc_os08g37800.1 : 619.0) no description available & (q02723|rkin1_secce : 551.0) Carbon catabolite derepressing protein kinase (EC 2.7.11.1) - Secale cereale (Rye) & (at3g01090 : 531.0) encodes a SNF1-related protein kinase that physically interacts with SCF subunit SKP1/ASK1 and 20S proteosome subunit PAD1. It can also interact with PRL1 DWD-containing protein. Based on in vitro degradation a…
'30.1'	'signalling.in sugar and nutrient physiology'	HORVU5Hr1G070740,3	-11.2204	0	'(loc_os03g17980.2 : 232.0) no description available & (q02723|rkin1_secce : 186.0) Carbon catabolite derepressing protein kinase (EC 2.7.11.1) - Secale cereale (Rye) & (at3g01090 : 180.0) encodes a SNF1-related protein kinase that physically interacts with SCF subunit SKP1/ASK1 and 20S proteosome subunit PAD1. It can also interact with PRL1 DWD-containing protein. Based on in vitro degradation a…
'30.1'	'signalling.in sugar and nutrient physiology'	HORVU7Hr1G068630,11	-12.006	0	'(loc_os08g37800.1 : 734.0) no description available & (q02723|rkin1_secce : 656.0) Carbon catabolite derepressing protein kinase (EC 2.7.11.1) - Secale cereale (Rye) & (at3g01090 : 606.0) encodes a SNF1-related protein kinase that physically interacts with SCF subunit SKP1/ASK1 and 20S proteosome subunit PAD1. It can also interact with PRL1 DWD-containing protein. Based on in vitro degradation a…
'30.1'	'signalling.in sugar and nutrient physiology'	HORVU7Hr1G075150,6	-9.94105	5.84902e-132	'(loc_os08g37800.1 : 872.0) no description available & (q02723|rkin1_secce : 792.0) Carbon catabolite derepressing protein kinase (EC 2.7.11.1) - Secale cereale (Rye) & (at3g01090 : 695.0) encodes a SNF1-related protein kinase that physically interacts with SCF subunit SKP1/ASK1 and 20S proteosome subunit PAD1. It can also interact with PRL1 DWD-containing protein. Based on in vitro degradation a…
'30.1.2'	'signalling.in sugar and nutrient physiology.pyruvate dehydrogenase kinase'	HORVU2Hr1G027040,5	-9.61655	3.70246e-41	'(loc_os07g44330.2 : 595.0) no description available & (at3g06483 : 479.0) Pyruvate dehydrogenase kinase (PDK) specifically phosphorylates the E1&#945; subunit of the pyruvate dehydrogenase complex (PDC) on a Ser residue using ATP as a phosphate donor. PDK is a unique type of protein kinase having a His-kinase-like sequence but Ser-kinase activity. Site-directed mutagenesis and structural analysi…
'30.2.25'	'signalling.receptor kinases.wall associated kinase'	HORVU3Hr1G000980,2	-9.93517	1.83766e-134	'(loc_os04g30010.1 : 620.0) no description available & (at1g21240 : 281.0) encodes a wall-associated kinase; wall associated kinase 3 (WAK3); FUNCTIONS IN: protein serine/threonine kinase activity, kinase activity; INVOLVED IN: protein amino acid phosphorylation; LOCATED IN: plasma membrane; EXPRESSED IN: 9 plant structures; EXPRESSED DURING: 9 growth stages; CONTAINS InterPro DOMAIN/s: EGF-like …
'30.2.25'	'signalling.receptor kinases.wall associated kinase'	HORVU6Hr1G004270,2	-6.88264	1.80033e-20	'(loc_os02g01730.1 : 171.0) no description available & (at1g33260 : 91.7) Protein kinase superfamily protein; FUNCTIONS IN: kinase activity; INVOLVED IN: protein amino acid phosphorylation; LOCATED IN: cellular_component unknown; EXPRESSED IN: 16 plant structures; EXPRESSED DURING: 7 growth stages; CONTAINS InterPro DOMAIN/s: Protein kinase, ATP binding site (InterPro:IPR017441), Protein kinase, …
'30.2.3'	'signalling.receptor kinases.leucine rich repeat III'	HORVU2Hr1G017650,7	-9.69174	2.28176e-95	'(loc_os07g48310.2 : 849.0) no description available & (at5g58300 : 571.0) Leucine-rich repeat protein kinase family protein; FUNCTIONS IN: protein serine/threonine kinase activity, kinase activity, ATP binding; INVOLVED IN: transmembrane receptor protein tyrosine kinase signaling pathway, protein amino acid phosphorylation; LOCATED IN: plasma membrane; EXPRESSED IN: 22 plant structures; EXPRESSE…
'30.3'	'signalling.calcium'	HORVU2Hr1G052430,4	-9.88111	9.65512e-172	'(loc_os07g22640.3 : 360.0) no description available & (at3g61050 : 277.0) NTMC2T4; FUNCTIONS IN: lipid binding; INVOLVED IN: biological_process unknown; LOCATED IN: plasma membrane; EXPRESSED IN: male gametophyte, cultured cell, callus, pollen tube; EXPRESSED DURING: M germinated pollen stage; CONTAINS InterPro DOMAIN/s: C2 membrane targeting protein (InterPro:IPR018029), C2 calcium/lipid-bindin…
'30.3'	'signalling.calcium'	HORVU2Hr1G087010,3	-9.65821	3.12234e-117	'(loc_os04g42430.2 : 134.0) no description available & (at4g32060 : 99.8) calcium-binding EF hand family protein; FUNCTIONS IN: calcium ion binding; EXPRESSED IN: 24 plant structures; EXPRESSED DURING: 15 growth stages; CONTAINS InterPro DOMAIN/s: EF-Hand 1, calcium-binding site (InterPro:IPR018247), EF-HAND 2 (InterPro:IPR018249), EF-hand-like domain (InterPro:IPR011992), Calcium-binding EF-hand…
'30.3'	'signalling.calcium'	HORVU4Hr1G052210,2	-9.64746	5.07718e-39	'(at3g43810 : 248.0) EF hand domain protein encodes a calmodulin. Can functionally complement a yeast CaM mutant.; calmodulin 7 (CAM7); FUNCTIONS IN: calcium ion binding; INVOLVED IN: detection of calcium ion, calcium-mediated signaling, regulation of photomorphogenesis; LOCATED IN: cellular_component unknown; EXPRESSED IN: 25 plant structures; EXPRESSED DURING: 15 growth stages; CONTAINS InterPr…
'30.3'	'signalling.calcium'	HORVU5Hr1G043640,10	-9.8392	1.57192e-72	'(q2ras0|aca5_orysa : 1170.0) Probable calcium-transporting ATPase 5, plasma membrane-type (EC 3.6.3.8) (Ca(2+)-ATPase isoform 5) - Oryza sativa (Rice) & (loc_os11g04460.1 : 1170.0) no description available & (at3g57330 : 928.0) autoinhibited Ca2+-ATPase 11 (ACA11); FUNCTIONS IN: calcium-transporting ATPase activity, calmodulin binding; INVOLVED IN: defense response to bacterium, negative regulat…
'30.3'	'signalling.calcium'	HORVU7Hr1G100500,7	-9.71768	3.48178e-206	'(loc_os06g47330.1 : 679.0) no description available & (at3g20290 : 654.0) Encodes AtEHD1, one of the Arabidopsis Eps15 homology domain proteins involved in endocytosis (AtEHD2, At4g05520).; EPS15 homology domain 1 (EHD1); FUNCTIONS IN: GTP binding, GTPase activity, calcium ion binding; INVOLVED IN: endocytosis; LOCATED IN: endosome, microsome, membrane, cytoplasm; EXPRESSED IN: 24 plant structur…
'30.5'	'signalling.G-proteins'	HORVU3Hr1G071740,3	-9.7151	4.1597e-243	'(loc_os01g54590.1 : 393.0) no description available & (p40393|ric2_orysa : 365.0) Ras-related protein RIC2 - Oryza sativa (Rice) & (at1g16920 : 354.0) small GTP-binding protein (Rab11)similar to YPT3/RAB11 proteins in yeast and mammals, respectively. YPT3/RAB11 is involved in intracellular protein trafficking.; RAB GTPase homolog A1B (RABA1b); FUNCTIONS IN: GTP binding; INVOLVED IN: intracellula…
'30.5'	'signalling.G-proteins'	HORVU3Hr1G087250,11	-10.0546	0	'(loc_os01g61860.1 : 660.0) no description available & (at3g55020 : 552.0) Ypt/Rab-GAP domain of gyp1p superfamily protein; FUNCTIONS IN: RAB GTPase activator activity; INVOLVED IN: regulation of Rab GTPase activity; LOCATED IN: cytosol; EXPRESSED IN: 25 plant structures; EXPRESSED DURING: 13 growth stages; CONTAINS InterPro DOMAIN/s: RabGAP/TBC (InterPro:IPR000195); BEST Arabidopsis thaliana pro…
'31.1'	'cell.organisation'	HORVU1Hr1G092730,7	-9.90539	1.56121e-34	'(q6i588|abil4_orysa : 375.0) Probable protein ABIL4 (Abl interactor-like protein 4) - Oryza sativa (Rice) & (loc_os05g50800.2 : 375.0) no description available & (at2g46225 : 221.0) Encodes a subunit of the WAVE complex. The WAVE complex is required for activation of ARP2/3 complex which functions in actin microfilament nucleation and branching. One of four ABI-like proteins.; ABI-1-like 1 (ABIL…
'31.1'	'cell.organisation'	HORVU2Hr1G071240,9	-10.2889	3.56222e-212	'(loc_os03g05260.1 : 258.0) no description available & (at3g09890 : 185.0) Ankyrin repeat family protein; INVOLVED IN: biological_process unknown; LOCATED IN: cellular_component unknown; EXPRESSED IN: 15 plant structures; EXPRESSED DURING: 8 growth stages; CONTAINS InterPro DOMAIN/s: Ankyrin repeat-containing domain (InterPro:IPR020683), Ankyrin repeat (InterPro:IPR002110); BEST Arabidopsis thali…
'31.1'	'cell.organisation'	HORVU4Hr1G079190,4	-10.3761	7.68338e-112	'(loc_os03g05260.1 : 259.0) no description available & (at3g09890 : 184.0) Ankyrin repeat family protein; INVOLVED IN: biological_process unknown; LOCATED IN: cellular_component unknown; EXPRESSED IN: 15 plant structures; EXPRESSED DURING: 8 growth stages; CONTAINS InterPro DOMAIN/s: Ankyrin repeat-containing domain (InterPro:IPR020683), Ankyrin repeat (InterPro:IPR002110); BEST Arabidopsis thali…
'31.1'	'cell.organisation'	HORVU6Hr1G027620,4	-10.6184	0	'(loc_os03g05260.1 : 174.0) no description available & (at3g09890 : 142.0) Ankyrin repeat family protein; INVOLVED IN: biological_process unknown; LOCATED IN: cellular_component unknown; EXPRESSED IN: 15 plant structures; EXPRESSED DURING: 8 growth stages; CONTAINS InterPro DOMAIN/s: Ankyrin repeat-containing domain (InterPro:IPR020683), Ankyrin repeat (InterPro:IPR002110); BEST Arabidopsis thali…
'31.1'	'cell.organisation'	HORVU7Hr1G053170,4	-11.4909	0	'(loc_os03g05260.1 : 258.0) no description available & (at3g09890 : 185.0) Ankyrin repeat family protein; INVOLVED IN: biological_process unknown; LOCATED IN: cellular_component unknown; EXPRESSED IN: 15 plant structures; EXPRESSED DURING: 8 growth stages; CONTAINS InterPro DOMAIN/s: Ankyrin repeat-containing domain (InterPro:IPR020683), Ankyrin repeat (InterPro:IPR002110); BEST Arabidopsis thali…
'31.1.1.1.2'	'cell.organisation.cytoskeleton.actin.actin depolymerizing factors'	HORVU1Hr1G000710,2	-10.4727	4.5024e-278	'(loc_os03g56790.1 : 268.0) no description available & (q8sag3|adf_vitvi : 218.0) Actin-depolymerizing factor (ADF) - Vitis vinifera (Grape) & (at2g31200 : 212.0) Encodes actin depolymerizing factor 6 (ADF6).; actin depolymerizing factor 6 (ADF6); FUNCTIONS IN: actin binding; INVOLVED IN: biological_process unknown; LOCATED IN: intracellular; EXPRESSED IN: 24 plant structures; EXPRESSED DURING: 1…
'31.1.1.1.2'	'cell.organisation.cytoskeleton.actin.actin depolymerizing factors'	HORVU7Hr1G036160,1	-10.9498	1.43871e-155	'(loc_os03g56790.1 : 277.0) no description available & (q8sag3|adf_vitvi : 218.0) Actin-depolymerizing factor (ADF) - Vitis vinifera (Grape) & (at2g31200 : 212.0) Encodes actin depolymerizing factor 6 (ADF6).; actin depolymerizing factor 6 (ADF6); FUNCTIONS IN: actin binding; INVOLVED IN: biological_process unknown; LOCATED IN: intracellular; EXPRESSED IN: 24 plant structures; EXPRESSED DURING: 1…
'31.1.1.1.2'	'cell.organisation.cytoskeleton.actin.actin depolymerizing factors'	HORVU5Hr1G100770,2	-10.388	0	'(loc_os03g56790.1 : 277.0) no description available & (q8sag3|adf_vitvi : 218.0) Actin-depolymerizing factor (ADF) - Vitis vinifera (Grape) & (at2g31200 : 212.0) Encodes actin depolymerizing factor 6 (ADF6).; actin depolymerizing factor 6 (ADF6); FUNCTIONS IN: actin binding; INVOLVED IN: biological_process unknown; LOCATED IN: intracellular; EXPRESSED IN: 24 plant structures; EXPRESSED DURING: 1…
'31.1.1.2'	'cell.organisation.cytoskeleton.mikrotubuli'	HORVU1Hr1G062650,7	-10.3587	0	'(q9zrb0|tbb3_wheat : 850.0) Tubulin beta-3 chain (Beta-3 tubulin) - Triticum aestivum (Wheat) & (loc_os06g46000.1 : 838.0) no description available & (at5g62700 : 827.0) encodes tubulin beta-2/beta-3 chain; tubulin beta chain 3 (TUB3); FUNCTIONS IN: structural molecule activity, GTP binding, GTPase activity; INVOLVED IN: response to cold; LOCATED IN: tubulin complex, cell wall; EXPRESSED IN: cul…
'31.1.1.2'	'cell.organisation.cytoskeleton.mikrotubuli'	HORVU5Hr1G048010,13	-11.3669	0	'(q9zrb0|tbb3_wheat : 577.0) Tubulin beta-3 chain (Beta-3 tubulin) - Triticum aestivum (Wheat) & (loc_os02g07060.1 : 571.0) no description available & (at5g62700 : 567.0) encodes tubulin beta-2/beta-3 chain; tubulin beta chain 3 (TUB3); FUNCTIONS IN: structural molecule activity, GTP binding, GTPase activity; INVOLVED IN: response to cold; LOCATED IN: tubulin complex, cell wall; EXPRESSED IN: cul…
'31.1.1.2'	'cell.organisation.cytoskeleton.mikrotubuli'	HORVU5Hr1G072260,6	-10.3443	3.14216e-294	'(q9zrb0|tbb3_wheat : 752.0) Tubulin beta-3 chain (Beta-3 tubulin) - Triticum aestivum (Wheat) & (loc_os06g46000.1 : 743.0) no description available & (at5g62700 : 737.0) encodes tubulin beta-2/beta-3 chain; tubulin beta chain 3 (TUB3); FUNCTIONS IN: structural molecule activity, GTP binding, GTPase activity; INVOLVED IN: response to cold; LOCATED IN: tubulin complex, cell wall; EXPRESSED IN: cul…
'31.1.1.2'	'cell.organisation.cytoskeleton.mikrotubuli'	HORVU7Hr1G019930,22	-10.8494	0	'(q9zrb0|tbb3_wheat : 426.0) Tubulin beta-3 chain (Beta-3 tubulin) - Triticum aestivum (Wheat) & (at5g62700 : 421.0) encodes tubulin beta-2/beta-3 chain; tubulin beta chain 3 (TUB3); FUNCTIONS IN: structural molecule activity, GTP binding, GTPase activity; INVOLVED IN: response to cold; LOCATED IN: tubulin complex, cell wall; EXPRESSED IN: cultured cell, seed; CONTAINS InterPro DOMAIN/s: Beta tub…
'31.2'	'cell.division'	HORVU2Hr1G109910,12	-9.93221	1.1319e-92	'(loc_os04g56720.1 : 285.0) no description available & (at1g19880 : 224.0) Regulator of chromosome condensation (RCC1) family protein; CONTAINS InterPro DOMAIN/s: Regulator of chromosome condensation/beta-lactamase-inhibitor protein II (InterPro:IPR009091), Regulator of chromosome condensation, RCC1 (InterPro:IPR000408); BEST Arabidopsis thaliana protein match is: Regulator of chromosome condensa…
'31.2'	'cell.division'	HORVU5Hr1G040730,4	-9.77808	2.55784e-125	'(loc_os11g04954.1 : 646.0) no description available & (p37384|dmc1_lillo : 585.0) Meiotic recombination protein DMC1 homolog - Lilium longiflorum (Trumpet lily) & (at3g22880 : 549.0) Expression of the AtDMC1 is restricted to pollen mother cells in anthers and to megaspore mother cells in ovules. Similar to meiosis-specific yeast DMC gene.; DISRUPTION OF MEIOTIC CONTROL 1 (DMC1); FUNCTIONS IN: in…
'31.3'	'cell.cycle'	HORVU1Hr1G008620,10	-9.91588	2.13064e-77	'(loc_os02g21880.1 : 527.0) no description available & (at1g25682 : 409.0) Family of unknown function (DUF572) ; FUNCTIONS IN: molecular_function unknown; INVOLVED IN: biological_process unknown; LOCATED IN: cellular_component unknown; EXPRESSED IN: cotyledon; CONTAINS InterPro DOMAIN/s: Protein of unknown function DUF572 (InterPro:IPR007590); BEST Arabidopsis thaliana protein match is: Family of…
'31.4'	'cell.vesicle transport'	HORVU4Hr1G065380,5	-10.1072	0	'(loc_os03g12590.1 : 1520.0) no description available & (at4g34450 : 1300.0) coatomer gamma-2 subunit, putative / gamma-2 coat protein, putative / gamma-2 COP, putative; FUNCTIONS IN: clathrin binding, structural molecule activity, binding; INVOLVED IN: intracellular protein transport, vesicle-mediated transport; LOCATED IN: chloroplast, membrane; EXPRESSED IN: 26 plant structures; EXPRESSED DURI…
'31.4'	'cell.vesicle transport'	HORVU5Hr1G094420,11	-9.72281	0	'(loc_os03g53280.1 : 5585.0) no description available & (at1g03060 : 4085.0) Encodes a WD/BEACH domain protein involved in cell morphogenesis.; SPIRRIG (SPI); FUNCTIONS IN: binding; INVOLVED IN: signal transduction, multidimensional cell growth, vacuole organization, trichome morphogenesis; LOCATED IN: cellular_component unknown; EXPRESSED IN: 23 plant structures; EXPRESSED DURING: 15 growth stag…
'33.99'	'development.unspecified'	HORVU2Hr1G005650,20	-11.8868	0	'(loc_os02g07120.1 : 1394.0) no description available & (at2g02560 : 1168.0) Arabidopsis thaliana homolog of human CAND1 (cullin-associated and neddylation-dissociated). Putative similarity to TBP-interacting protein TIP120. Ubiquitously expressed in plant tissues throughout development. T-DNA insertion mutant plants were completely sterile and resistant to sirtinol and auxin, but not to gibberel…
'33.99'	'development.unspecified'	HORVU2Hr1G031130,15	-10.6375	0	'(loc_os02g07120.1 : 1097.0) no description available & (at2g02560 : 901.0) Arabidopsis thaliana homolog of human CAND1 (cullin-associated and neddylation-dissociated). Putative similarity to TBP-interacting protein TIP120. Ubiquitously expressed in plant tissues throughout development. T-DNA insertion mutant plants were completely sterile and resistant to sirtinol and auxin, but not to gibberell…
'33.99'	'development.unspecified'	HORVU3Hr1G049960,17	-9.64024	3.6604e-38	'(loc_os01g39310.2 : 840.0) no description available & (at3g13870 : 585.0) required for regulated cell expansion and normal root hair development. Encodes an evolutionarily conserved protein with putative GTP-binding motifs that is implicated in the control of vesicle trafficking between the endoplasmic reticulum and the Golgi compartments.; ROOT HAIR DEFECTIVE 3 (RHD3); FUNCTIONS IN: GTP binding…
'33.99'	'development.unspecified'	HORVU4Hr1G016440,7	-10.1687	7.17448e-94	'(loc_os11g11020.1 : 209.0) no description available & (q38732|dag_antma : 145.0) DAG protein, chloroplast precursor - Antirrhinum majus (Garden snapdragon) & (at1g11430 : 143.0) plastid developmental protein DAG, putative; LOCATED IN: chloroplast stroma, chloroplast, chloroplast envelope; EXPRESSED IN: 22 plant structures; EXPRESSED DURING: 14 growth stages; BEST Arabidopsis thaliana protein mat…
'33.99'	'development.unspecified'	HORVU6Hr1G055960,5	-9.6987	6.87524e-35	'(loc_os02g19820.1 : 160.0) no description available & (at4g10850 : 94.0) Nodulin MtN3 family protein; LOCATED IN: endomembrane system, integral to membrane, membrane; EXPRESSED IN: 9 plant structures; EXPRESSED DURING: 4 anthesis, C globular stage, petal differentiation and expansion stage, E expanded cotyledon stage; CONTAINS InterPro DOMAIN/s: MtN3/saliva-related transmembrane protein, conserv…
'33.99'	'development.unspecified'	HORVU7Hr1G027670,14	-10.007	1.74543e-85	'(loc_os06g07540.2 : 507.0) no description available & (at5g56190 : 352.0) Transducin/WD40 repeat-like superfamily protein; CONTAINS InterPro DOMAIN/s: WD40 repeat-like-containing domain (InterPro:IPR011046), WD40 repeat 2 (InterPro:IPR019782), WD40-repeat-containing domain (InterPro:IPR017986), WD40/YVTN repeat-like-containing domain (InterPro:IPR015943), WD40 repeat (InterPro:IPR001680), WD40 r…
'33.99'	'development.unspecified'	HORVU7Hr1G075150,7	-11.0553	0	'(loc_os02g07120.1 : 1390.0) no description available & (at2g02560 : 1163.0) Arabidopsis thaliana homolog of human CAND1 (cullin-associated and neddylation-dissociated). Putative similarity to TBP-interacting protein TIP120. Ubiquitously expressed in plant tissues throughout development. T-DNA insertion mutant plants were completely sterile and resistant to sirtinol and auxin, but not to gibberel…
'34'	'transport'	HORVU2Hr1G089640,14	-9.6987	3.0897e-235	'(loc_os06g30950.1 : 578.0) no description available & (at2g28315 : 439.0) Nucleotide/sugar transporter family protein; CONTAINS InterPro DOMAIN/s: Protein of unknown function DUF250 (InterPro:IPR004853); BEST Arabidopsis thaliana protein match is: nodulin MtN21 /EamA-like transporter family protein (TAIR:AT1G06890.2); Has 30201 Blast hits to 17322 proteins in 780 species: Archae - 12; Bacteria -…
'34.1'	'transport.p- and v-ATPases'	HORVU1Hr1G032310,11	-10.0279	1.72561e-82	'(at1g59820 : 1653.0) Encodes a phospholipid translocase. Involved in secretory vesicle formation from trans-Golgi in peripheral columella cells at the root tip. Mutants have short primary roots and grow slower.; aminophospholipid ATPase 3 (ALA3); FUNCTIONS IN: phospholipid transporter activity, ATPase activity, coupled to transmembrane movement of ions, phosphorylative mechanism; INVOLVED IN: Go…
'34.1'	'transport.p- and v-ATPases'	HORVU2Hr1G089940,15	-11.5142	0	'(q40002|vata_horvu : 674.0) Vacuolar ATP synthase catalytic subunit A (EC 3.6.3.14) (V-ATPase subunit A) (Vacuolar proton pump subunit alpha) (V-ATPase 69 kDa subunit) (Fragment) - Hordeum vulgare (Barley) & (loc_os06g45120.1 : 644.0) no description available & (at1g78900 : 621.0) Encodes catalytic subunit A of the vacuolar ATP synthase. Mutants are devoid of vacuolar ATPase activity as subunit …
'34.1'	'transport.p- and v-ATPases'	HORVU3Hr1G007190,9	-11.3214	0	'(q40002|vata_horvu : 577.0) Vacuolar ATP synthase catalytic subunit A (EC 3.6.3.14) (V-ATPase subunit A) (Vacuolar proton pump subunit alpha) (V-ATPase 69 kDa subunit) (Fragment) - Hordeum vulgare (Barley) & (at1g78900 : 556.0) Encodes catalytic subunit A of the vacuolar ATP synthase. Mutants are devoid of vacuolar ATPase activity as subunit A is encoded only by this gene and show strong defects…
'34.1'	'transport.p- and v-ATPases'	HORVU3Hr1G025820,3	-10.1408	1.09606e-154	'(q40002|vata_horvu : 921.0) Vacuolar ATP synthase catalytic subunit A (EC 3.6.3.14) (V-ATPase subunit A) (Vacuolar proton pump subunit alpha) (V-ATPase 69 kDa subunit) (Fragment) - Hordeum vulgare (Barley) & (loc_os06g45120.1 : 879.0) no description available & (at1g78900 : 845.0) Encodes catalytic subunit A of the vacuolar ATP synthase. Mutants are devoid of vacuolar ATPase activity as subunit …
'34.1'	'transport.p- and v-ATPases'	HORVU3Hr1G032490,3	-11.2246	9.0714e-216	'(q40002|vata_horvu : 921.0) Vacuolar ATP synthase catalytic subunit A (EC 3.6.3.14) (V-ATPase subunit A) (Vacuolar proton pump subunit alpha) (V-ATPase 69 kDa subunit) (Fragment) - Hordeum vulgare (Barley) & (loc_os06g45120.1 : 879.0) no description available & (at1g78900 : 845.0) Encodes catalytic subunit A of the vacuolar ATP synthase. Mutants are devoid of vacuolar ATPase activity as subunit …
'34.1'	'transport.p- and v-ATPases'	HORVU5Hr1G094000,1	-9.89936	8.05664e-187	'(loc_os09g38768.2 : 389.0) no description available & (at1g79450 : 305.0) ALA-interacting subunit 5 (ALIS5); INVOLVED IN: biological_process unknown; LOCATED IN: chloroplast thylakoid lumen, plasma membrane, membrane; EXPRESSED IN: 12 plant structures; EXPRESSED DURING: L mature pollen stage, M germinated pollen stage, 4 anthesis, petal differentiation and expansion stage; CONTAINS InterPro DOMA…
'34.1'	'transport.p- and v-ATPases'	HORVU7Hr1G109770,7	-12.4333	0	'(q40002|vata_horvu : 1156.0) Vacuolar ATP synthase catalytic subunit A (EC 3.6.3.14) (V-ATPase subunit A) (Vacuolar proton pump subunit alpha) (V-ATPase 69 kDa subunit) (Fragment) - Hordeum vulgare (Barley) & (loc_os06g45120.1 : 1110.0) no description available & (at1g78900 : 1068.0) Encodes catalytic subunit A of the vacuolar ATP synthase. Mutants are devoid of vacuolar ATPase activity as subun…
'34.1'	'transport.p- and v-ATPases'	HORVU7Hr1G115540,10	-10.7723	1.24786e-178	'(loc_os06g45120.1 : 1165.0) no description available & (q40002|vata_horvu : 1156.0) Vacuolar ATP synthase catalytic subunit A (EC 3.6.3.14) (V-ATPase subunit A) (Vacuolar proton pump subunit alpha) (V-ATPase 69 kDa subunit) (Fragment) - Hordeum vulgare (Barley) & (at1g78900 : 1121.0) Encodes catalytic subunit A of the vacuolar ATP synthase. Mutants are devoid of vacuolar ATPase activity as subun…
'34.1.1'	'transport.p- and v-ATPases.H+-transporting two-sector ATPase'	HORVU1Hr1G002500,1	-9.60177	2.25586e-92	'(p23957|vatl_avesa : 158.0) Vacuolar ATP synthase 16 kDa proteolipid subunit (EC 3.6.3.14) - Avena sativa (Oat) & (loc_os11g06890.1 : 157.0) no description available & (at4g34720 : 152.0) vacuolar H+-pumping ATPase 16 kDa proteolipid (ava-p1); AVA-P1; FUNCTIONS IN: ATPase activity, proton-transporting ATPase activity, rotational mechanism; INVOLVED IN: proton transport, ATP synthesis coupled pro…
'34.12'	'transport.metal'	HORVU1Hr1G071930,10	-7.49185	1.40494e-28	'(loc_os01g62070.1 : 574.0) no description available & (at2g39450 : 531.0) Encodes a Golgi-localized manganese transporter that is involved in Mn tolerance. When expressed into yeast cells, this gene confer Mn<sup>2+</sup> and Cu<sup>2+</sup> tolerance.; MTP11; CONTAINS InterPro DOMAIN/s: Cation efflux protein (InterPro:IPR002524); BEST Arabidopsis thaliana protein match is: Cation efflux family …
'34.12'	'transport.metal'	HORVU2Hr1G065930,7	-10.2204	2.96228e-130	'(loc_os04g23180.1 : 352.0) no description available & (at1g51610 : 303.0) Cation efflux family protein; FUNCTIONS IN: cation transmembrane transporter activity, efflux transmembrane transporter activity; INVOLVED IN: cation transport, transmembrane transport; LOCATED IN: membrane; EXPRESSED IN: 22 plant structures; EXPRESSED DURING: 13 growth stages; CONTAINS InterPro DOMAIN/s: Cation efflux pro…
'34.19.1'	'transport.Major Intrinsic Proteins.PIP'	HORVU2Hr1G096360,7	-9.96578	3.818e-67	'(q6eu94|pip11_orysa : 387.0) Aquaporin PIP1.1 (Plasma membrane intrinsic protein 1a) (PIP1a) (OsPIP1.1) (Water channel protein RWC1) (RWC-1) - Oryza sativa (Rice) & (loc_os02g44630.2 : 387.0) no description available & (at4g23400 : 373.0) plasma membrane intrinsic protein 1;5 (PIP1;5); FUNCTIONS IN: water channel activity; INVOLVED IN: response to salt stress, transport; LOCATED IN: plasma membr…
'34.2'	'transport.sugars'	HORVU2Hr1G090610,12	-9.72792	4.1761e-133	'(loc_os04g44430.1 : 693.0) no description available & (at5g64500 : 555.0) Major facilitator superfamily protein; FUNCTIONS IN: molecular_function unknown; INVOLVED IN: transmembrane transport; LOCATED IN: membrane; EXPRESSED IN: 24 plant structures; EXPRESSED DURING: 15 growth stages; CONTAINS InterPro DOMAIN/s: Major facilitator superfamily (InterPro:IPR020846), Major facilitator superfamily MF…
'34.2'	'transport.sugars'	HORVU2Hr1G079620,3	-7.01123	1.61903e-17	'(loc_os04g37980.1 : 689.0) no description available & (at1g34580 : 488.0) Major facilitator superfamily protein; FUNCTIONS IN: carbohydrate transmembrane transporter activity, sugar:hydrogen symporter activity; INVOLVED IN: transport, transmembrane transport; LOCATED IN: integral to membrane, membrane; EXPRESSED IN: 12 plant structures; EXPRESSED DURING: 7 growth stages; CONTAINS InterPro DOMAIN…
'34.2'	'transport.sugars'	HORVU4Hr1G084740,4	-7.71425	1.66542e-36	'(loc_os04g37970.1 : 665.0) no description available & (at1g34580 : 436.0) Major facilitator superfamily protein; FUNCTIONS IN: carbohydrate transmembrane transporter activity, sugar:hydrogen symporter activity; INVOLVED IN: transport, transmembrane transport; LOCATED IN: integral to membrane, membrane; EXPRESSED IN: 12 plant structures; EXPRESSED DURING: 7 growth stages; CONTAINS InterPro DOMAIN…
'34.2.1'	'transport.sugars.sucrose'	HORVU4Hr1G075200,6	-9.90238	0	'(loc_os03g07480.3 : 689.0) no description available & (at2g02860 : 455.0) encodes a sucrose transporter in sieve elements and a number of sink tissues and cell types. Gene expression is induced by wounding.; sucrose transporter 2 (SUT2); CONTAINS InterPro DOMAIN/s: Major facilitator superfamily MFS-1 (InterPro:IPR011701), Major facilitator superfamily, general substrate transporter (InterPro:IPR…
'34.21'	'transport.calcium'	HORVU5Hr1G048120,19	-9.62022	1.2821e-66	'(loc_os12g07650.1 : 446.0) no description available & (at2g38270 : 306.0) Encodes protein homologous to CXIP1. CXIP1 is a PICOT domain containing protein interacts with CAX1, a high capacity calcium transporter. However, CXP2 does not interact with CAX1 and only moderately activates another calcium transporter CAX4.; CAX-interacting protein 2 (CXIP2); FUNCTIONS IN: electron carrier activity, pro…
'34.22'	'transport.cyclic nucleotide or calcium regulated channels'	HORVU2Hr1G114940,7	-10.0701	1.03727e-79	'(loc_os04g55080.1 : 1120.0) no description available & (at5g57940 : 820.0) member of Cyclic nucleotide gated channel family; cyclic nucleotide gated channel 5 (CNGC5); FUNCTIONS IN: cyclic nucleotide binding, calmodulin binding, potassium channel activity; INVOLVED IN: ion transport, transmembrane transport; LOCATED IN: membrane; EXPRESSED IN: 22 plant structures; EXPRESSED DURING: 13 growth sta…
'34.3'	'transport.amino acids'	HORVU5Hr1G006900,12	-10.1649	5.36416e-78	'(loc_os12g42850.1 : 633.0) no description available & (at1g58030 : 469.0) Encodes a member of the cationic amino acid transporter (CAT) subfamily of amino acid polyamine choline transporters. Localized to the tonoplast.; cationic amino acid transporter 2 (CAT2); FUNCTIONS IN: amino acid transmembrane transporter activity; INVOLVED IN: amino acid transport, transport, transmembrane transport; LOC…
'34.9'	'transport.metabolite transporters at the mitochondrial membrane'	HORVU2Hr1G090800,6	-10.1189	1.26779e-113	'(loc_os04g44540.2 : 500.0) no description available & (at4g15010 : 324.0) Mitochondrial substrate carrier family protein; FUNCTIONS IN: binding; INVOLVED IN: transport, mitochondrial transport, transmembrane transport; LOCATED IN: endomembrane system, mitochondrial inner membrane, membrane; EXPRESSED IN: 19 plant structures; EXPRESSED DURING: 8 growth stages; CONTAINS InterPro DOMAIN/s: Mitochon…
'35.1'	'not assigned.no ontology'	HORVU1Hr1G064630,9	-10.7168	0	'(loc_os04g21320.1 : 298.0) no description available & (at1g17200 : 186.0) Uncharacterised protein family (UPF0497); FUNCTIONS IN: protein binding; INVOLVED IN: response to karrikin; EXPRESSED IN: 22 plant structures; EXPRESSED DURING: 13 growth stages; CONTAINS InterPro DOMAIN/s: Uncharacterised protein family UPF0497, trans-membrane plant (InterPro:IPR006702); BEST Arabidopsis thaliana protein …
'35.1'	'not assigned.no ontology'	HORVU2Hr1G037470,2	-10.6393	0	'(loc_os04g21320.1 : 330.0) no description available & (at1g17200 : 191.0) Uncharacterised protein family (UPF0497); FUNCTIONS IN: protein binding; INVOLVED IN: response to karrikin; EXPRESSED IN: 22 plant structures; EXPRESSED DURING: 13 growth stages; CONTAINS InterPro DOMAIN/s: Uncharacterised protein family UPF0497, trans-membrane plant (InterPro:IPR006702); BEST Arabidopsis thaliana protein …
'35.1'	'not assigned.no ontology'	HORVU2Hr1G065330,6	-10.8872	0	'(loc_os04g21320.1 : 156.0) no description available & (at1g17200 : 103.0) Uncharacterised protein family (UPF0497); FUNCTIONS IN: protein binding; INVOLVED IN: response to karrikin; EXPRESSED IN: 22 plant structures; EXPRESSED DURING: 13 growth stages; CONTAINS InterPro DOMAIN/s: Uncharacterised protein family UPF0497, trans-membrane plant (InterPro:IPR006702); BEST Arabidopsis thaliana protein …
'35.1'	'not assigned.no ontology'	HORVU2Hr1G065330,5	-10.8564	1.95839e-236	'(loc_os04g21320.1 : 156.0) no description available & (at1g17200 : 103.0) Uncharacterised protein family (UPF0497); FUNCTIONS IN: protein binding; INVOLVED IN: response to karrikin; EXPRESSED IN: 22 plant structures; EXPRESSED DURING: 13 growth stages; CONTAINS InterPro DOMAIN/s: Uncharacterised protein family UPF0497, trans-membrane plant (InterPro:IPR006702); BEST Arabidopsis thaliana protein …
'35.1'	'not assigned.no ontology'	HORVU2Hr1G072500,37	-13.1788	0	'(loc_os05g51640.1 : 494.0) no description available & (at2g26590 : 324.0) regulatory particle non-ATPase 13 (RPN13); FUNCTIONS IN: molecular_function unknown; INVOLVED IN: cell adhesion; LOCATED IN: integral to membrane, nucleus, cytoplasm; EXPRESSED IN: 23 plant structures; EXPRESSED DURING: 13 growth stages; CONTAINS InterPro DOMAIN/s: 26S proteasome complex ubiquitin receptor, subunit Rpn13 (…
'35.1'	'not assigned.no ontology'	HORVU2Hr1G072830,4	-9.63481	9.0714e-216	'(loc_os04g33590.1 : 600.0) no description available & (at3g48410 : 400.0) alpha/beta-Hydrolases superfamily protein; CONTAINS InterPro DOMAIN/s: Alpha/beta hydrolase fold-1 (InterPro:IPR000073); BEST Arabidopsis thaliana protein match is: alpha/beta-Hydrolases superfamily protein (TAIR:AT2G36290.1); Has 1039 Blast hits to 1035 proteins in 267 species: Archae - 10; Bacteria - 561; Metazoa - 10; F…
'35.1'	'not assigned.no ontology'	HORVU2Hr1G087400,3	-10.9307	3.90438e-292	'(loc_os08g44530.1 : 129.0) no description available & (at3g23940 : 108.0) dehydratase family; CONTAINS InterPro DOMAIN/s: Dihydroxy-acid dehydratase (InterPro:IPR004404), Dihydroxy-acid/6-phosphogluconate dehydratase, conserved site (InterPro:IPR020558), Dihydroxy-acid/6-phosphogluconate dehydratase (InterPro:IPR000581). & (reliability: 216.0) & (original description: no original description)'
'35.1'	'not assigned.no ontology'	HORVU3Hr1G017970,6	-10.3542	0	'(loc_os02g13950.1 : 773.0) no description available & (at3g14860 : 421.0) NHL domain-containing protein; CONTAINS InterPro DOMAIN/s: NHL repeat (InterPro:IPR001258), Six-bladed beta-propeller, TolB-like (InterPro:IPR011042); BEST Arabidopsis thaliana protein match is: NHL domain-containing protein (TAIR:AT1G70280.2); Has 35333 Blast hits to 34131 proteins in 2444 species: Archae - 798; Bacteria …
'35.1'	'not assigned.no ontology'	HORVU3Hr1G025820,4	-10.3038	0	'(loc_os02g13950.1 : 457.0) no description available & (at3g14860 : 194.0) NHL domain-containing protein; CONTAINS InterPro DOMAIN/s: NHL repeat (InterPro:IPR001258), Six-bladed beta-propeller, TolB-like (InterPro:IPR011042); BEST Arabidopsis thaliana protein match is: NHL domain-containing protein (TAIR:AT1G70280.2); Has 35333 Blast hits to 34131 proteins in 2444 species: Archae - 798; Bacteria …
'35.1'	'not assigned.no ontology'	HORVU3Hr1G067370,1	-11.3337	0	'(loc_os05g51640.1 : 285.0) no description available & (at2g26590 : 172.0) regulatory particle non-ATPase 13 (RPN13); FUNCTIONS IN: molecular_function unknown; INVOLVED IN: cell adhesion; LOCATED IN: integral to membrane, nucleus, cytoplasm; EXPRESSED IN: 23 plant structures; EXPRESSED DURING: 13 growth stages; CONTAINS InterPro DOMAIN/s: 26S proteasome complex ubiquitin receptor, subunit Rpn13 (…
'35.1'	'not assigned.no ontology'	HORVU3Hr1G116880,11	-9.71596	6.4397e-126	'(loc_os01g74460.2 : 595.0) no description available & (at2g28390 : 458.0) SAND family protein; LOCATED IN: chloroplast; EXPRESSED IN: 25 plant structures; EXPRESSED DURING: 14 growth stages; CONTAINS InterPro DOMAIN/s: Vacuolar fusion protein MON1 (InterPro:IPR004353); Has 753 Blast hits to 594 proteins in 226 species: Archae - 6; Bacteria - 38; Metazoa - 289; Fungi - 213; Plants - 47; Viruses -…
'35.1'	'not assigned.no ontology'	HORVU4Hr1G011020,5	-10.9054	3.8385e-292	'(loc_os05g51640.1 : 482.0) no description available & (at2g26590 : 322.0) regulatory particle non-ATPase 13 (RPN13); FUNCTIONS IN: molecular_function unknown; INVOLVED IN: cell adhesion; LOCATED IN: integral to membrane, nucleus, cytoplasm; EXPRESSED IN: 23 plant structures; EXPRESSED DURING: 13 growth stages; CONTAINS InterPro DOMAIN/s: 26S proteasome complex ubiquitin receptor, subunit Rpn13 (…
'35.1'	'not assigned.no ontology'	HORVU4Hr1G021000,7	-10.7465	0	'(loc_os02g13950.1 : 459.0) no description available & (at3g14860 : 195.0) NHL domain-containing protein; CONTAINS InterPro DOMAIN/s: NHL repeat (InterPro:IPR001258), Six-bladed beta-propeller, TolB-like (InterPro:IPR011042); BEST Arabidopsis thaliana protein match is: NHL domain-containing protein (TAIR:AT1G70280.2); Has 35333 Blast hits to 34131 proteins in 2444 species: Archae - 798; Bacteria …
'35.1'	'not assigned.no ontology'	HORVU4Hr1G055800,2	-10.5078	0	'(loc_os08g44530.1 : 728.0) no description available & (at3g23940 : 639.0) dehydratase family; CONTAINS InterPro DOMAIN/s: Dihydroxy-acid dehydratase (InterPro:IPR004404), Dihydroxy-acid/6-phosphogluconate dehydratase, conserved site (InterPro:IPR020558), Dihydroxy-acid/6-phosphogluconate dehydratase (InterPro:IPR000581). & (reliability: 1278.0) & (original description: no original description)'
'35.1'	'not assigned.no ontology'	HORVU4Hr1G073730,5	-10.2252	0	'(loc_os02g13950.1 : 776.0) no description available & (at3g14860 : 421.0) NHL domain-containing protein; CONTAINS InterPro DOMAIN/s: NHL repeat (InterPro:IPR001258), Six-bladed beta-propeller, TolB-like (InterPro:IPR011042); BEST Arabidopsis thaliana protein match is: NHL domain-containing protein (TAIR:AT1G70280.2); Has 35333 Blast hits to 34131 proteins in 2444 species: Archae - 798; Bacteria …
'35.1'	'not assigned.no ontology'	HORVU5Hr1G073450,4	-11.1241	0	'(loc_os07g38760.1 : 972.0) no description available & (at5g19820 : 834.0) embryo defective 2734 (emb2734); FUNCTIONS IN: lyase activity, binding; INVOLVED IN: embryo development ending in seed dormancy; LOCATED IN: cell wall, phycobilisome; EXPRESSED IN: 23 plant structures; EXPRESSED DURING: 14 growth stages; CONTAINS InterPro DOMAIN/s: HEAT (InterPro:IPR000357), Armadillo-like helical (InterPr…
'35.1'	'not assigned.no ontology'	HORVU5Hr1G093700,10	-9.94105	7.5143e-102	'(loc_os07g38760.1 : 1527.0) no description available & (at5g19820 : 1242.0) embryo defective 2734 (emb2734); FUNCTIONS IN: lyase activity, binding; INVOLVED IN: embryo development ending in seed dormancy; LOCATED IN: cell wall, phycobilisome; EXPRESSED IN: 23 plant structures; EXPRESSED DURING: 14 growth stages; CONTAINS InterPro DOMAIN/s: HEAT (InterPro:IPR000357), Armadillo-like helical (Inter…
'35.1'	'not assigned.no ontology'	HORVU5Hr1G114510,9	-11.0848	1.5641e-145	'(loc_os07g38760.1 : 996.0) no description available & (at5g19820 : 879.0) embryo defective 2734 (emb2734); FUNCTIONS IN: lyase activity, binding; INVOLVED IN: embryo development ending in seed dormancy; LOCATED IN: cell wall, phycobilisome; EXPRESSED IN: 23 plant structures; EXPRESSED DURING: 14 growth stages; CONTAINS InterPro DOMAIN/s: HEAT (InterPro:IPR000357), Armadillo-like helical (InterPr…
'35.1'	'not assigned.no ontology'	HORVU6Hr1G022770,6	-10.8956	1.21868e-68	'(loc_os07g38760.1 : 647.0) no description available & (at5g19820 : 586.0) embryo defective 2734 (emb2734); FUNCTIONS IN: lyase activity, binding; INVOLVED IN: embryo development ending in seed dormancy; LOCATED IN: cell wall, phycobilisome; EXPRESSED IN: 23 plant structures; EXPRESSED DURING: 14 growth stages; CONTAINS InterPro DOMAIN/s: HEAT (InterPro:IPR000357), Armadillo-like helical (InterPr…
'35.1'	'not assigned.no ontology'	HORVU6Hr1G037960,3	-10.3576	7.86092e-118	'(loc_os12g24330.1 : 887.0) no description available & (at1g21680 : 301.0) DPP6 N-terminal domain-like protein; FUNCTIONS IN: molecular_function unknown; INVOLVED IN: biological_process unknown; LOCATED IN: plasma membrane, vacuole, plant-type cell wall; EXPRESSED IN: 25 plant structures; EXPRESSED DURING: 13 growth stages; CONTAINS InterPro DOMAIN/s: WD40-like Beta Propeller (InterPro:IPR011659)…
'35.1'	'not assigned.no ontology'	HORVU6Hr1G045970,6	-10.3083	1.77031e-128	'(loc_os04g21320.1 : 156.0) no description available & (at1g17200 : 89.7) Uncharacterised protein family (UPF0497); FUNCTIONS IN: protein binding; INVOLVED IN: response to karrikin; EXPRESSED IN: 22 plant structures; EXPRESSED DURING: 13 growth stages; CONTAINS InterPro DOMAIN/s: Uncharacterised protein family UPF0497, trans-membrane plant (InterPro:IPR006702); BEST Arabidopsis thaliana protein m…
'35.1'	'not assigned.no ontology'	HORVU6Hr1G048550,2	-10.3912	3.72536e-103	'(loc_os08g44530.1 : 728.0) no description available & (at3g23940 : 639.0) dehydratase family; CONTAINS InterPro DOMAIN/s: Dihydroxy-acid dehydratase (InterPro:IPR004404), Dihydroxy-acid/6-phosphogluconate dehydratase, conserved site (InterPro:IPR020558), Dihydroxy-acid/6-phosphogluconate dehydratase (InterPro:IPR000581). & (reliability: 1278.0) & (original description: no original description)'
'35.1'	'not assigned.no ontology'	HORVU6Hr1G056180,4	-10.2877	9.43708e-166	'(loc_os08g44530.1 : 802.0) no description available & (at3g23940 : 703.0) dehydratase family; CONTAINS InterPro DOMAIN/s: Dihydroxy-acid dehydratase (InterPro:IPR004404), Dihydroxy-acid/6-phosphogluconate dehydratase, conserved site (InterPro:IPR020558), Dihydroxy-acid/6-phosphogluconate dehydratase (InterPro:IPR000581). & (reliability: 1406.0) & (original description: no original description)'
'35.1'	'not assigned.no ontology'	HORVU6Hr1G069560,4	-10.0947	0	'(loc_os02g48010.1 : 1335.0) no description available & (at1g67230 : 436.0) Encodes a nuclear coiled-coil protein related to the carrot peripheral nuclear protein NMCP1 that is involved in the determination of plant nuclear structure.; LITTLE NUCLEI1 (LINC1); FUNCTIONS IN: molecular_function unknown; INVOLVED IN: nucleus organization; LOCATED IN: cytosol, nucleus; EXPRESSED IN: 25 plant structure…
'35.1'	'not assigned.no ontology'	HORVU7Hr1G001020,22	-10.42	0	'(loc_os04g21320.1 : 330.0) no description available & (at1g17200 : 191.0) Uncharacterised protein family (UPF0497); FUNCTIONS IN: protein binding; INVOLVED IN: response to karrikin; EXPRESSED IN: 22 plant structures; EXPRESSED DURING: 13 growth stages; CONTAINS InterPro DOMAIN/s: Uncharacterised protein family UPF0497, trans-membrane plant (InterPro:IPR006702); BEST Arabidopsis thaliana protein …
'35.1'	'not assigned.no ontology'	HORVU7Hr1G001880,5	-9.80735	1.12596e-151	'(loc_os06g01700.1 : 268.0) no description available & (at3g13200 : 231.0) EMBRYO DEFECTIVE 2769 (EMB2769); FUNCTIONS IN: molecular_function unknown; INVOLVED IN: nuclear mRNA splicing, via spliceosome; LOCATED IN: spliceosomal complex; EXPRESSED IN: 24 plant structures; EXPRESSED DURING: 15 growth stages; CONTAINS InterPro DOMAIN/s: Cwf15/Cwc15 cell cycle control protein (InterPro:IPR006973); Ha…
'35.1'	'not assigned.no ontology'	HORVU7Hr1G011080,4	-9.84549	5.70932e-34	'(loc_os06g03760.2 : 489.0) no description available & (at5g01460 : 448.0) LMBR1-like membrane protein; CONTAINS InterPro DOMAIN/s: LMBR1-like membrane protein, conserved region (InterPro:IPR006876); BEST Arabidopsis thaliana protein match is: LMBR1-like membrane protein (TAIR:AT3G08930.1); Has 1807 Blast hits to 1807 proteins in 277 species: Archae - 0; Bacteria - 0; Metazoa - 736; Fungi - 347; …
'35.1'	'not assigned.no ontology'	HORVU7Hr1G039780,8	-9.77314	8.22838e-130	'(loc_os06g13100.1 : 270.0) no description available & (at2g04690 : 187.0) Pyridoxamine 5'-phosphate oxidase family protein; FUNCTIONS IN: FMN binding; INVOLVED IN: biological_process unknown; EXPRESSED IN: 22 plant structures; EXPRESSED DURING: 13 growth stages; CONTAINS InterPro DOMAIN/s: Cellular repressor of E1A-stimulated genes (CREG) (InterPro:IPR014631), FMN-binding split barrel (InterPro:…
'35.1'	'not assigned.no ontology'	HORVU7Hr1G052520,9	-10.543	1.10734e-207	'(loc_os02g13950.1 : 772.0) no description available & (at3g14860 : 424.0) NHL domain-containing protein; CONTAINS InterPro DOMAIN/s: NHL repeat (InterPro:IPR001258), Six-bladed beta-propeller, TolB-like (InterPro:IPR011042); BEST Arabidopsis thaliana protein match is: NHL domain-containing protein (TAIR:AT1G70280.2); Has 35333 Blast hits to 34131 proteins in 2444 species: Archae - 798; Bacteria …
'35.1'	'not assigned.no ontology'	HORVU7Hr1G059460,4	-11.7237	0	'(loc_os04g21320.1 : 330.0) no description available & (at1g17200 : 191.0) Uncharacterised protein family (UPF0497); FUNCTIONS IN: protein binding; INVOLVED IN: response to karrikin; EXPRESSED IN: 22 plant structures; EXPRESSED DURING: 13 growth stages; CONTAINS InterPro DOMAIN/s: Uncharacterised protein family UPF0497, trans-membrane plant (InterPro:IPR006702); BEST Arabidopsis thaliana protein …
'35.1'	'not assigned.no ontology'	HORVU7Hr1G076300,1	-12.1821	0	'(loc_os07g38760.1 : 1740.0) no description available & (at5g19820 : 1397.0) embryo defective 2734 (emb2734); FUNCTIONS IN: lyase activity, binding; INVOLVED IN: embryo development ending in seed dormancy; LOCATED IN: cell wall, phycobilisome; EXPRESSED IN: 23 plant structures; EXPRESSED DURING: 14 growth stages; CONTAINS InterPro DOMAIN/s: HEAT (InterPro:IPR000357), Armadillo-like helical (Inter…
'35.1'	'not assigned.no ontology'	HORVU7Hr1G120660,16	-10.6046	0	'(loc_os02g13950.1 : 459.0) no description available & (at3g14860 : 195.0) NHL domain-containing protein; CONTAINS InterPro DOMAIN/s: NHL repeat (InterPro:IPR001258), Six-bladed beta-propeller, TolB-like (InterPro:IPR011042); BEST Arabidopsis thaliana protein match is: NHL domain-containing protein (TAIR:AT1G70280.2); Has 35333 Blast hits to 34131 proteins in 2444 species: Archae - 798; Bacteria …
'35.1.21'	'not assigned.no ontology.epsin N-terminal homology (ENTH) domain-containing protein'	HORVU6Hr1G088570,7	-9.99152	6.6684e-242	'(loc_os02g56270.1 : 941.0) no description available & (at2g43160 : 434.0) ENTH/VHS family protein; FUNCTIONS IN: binding; LOCATED IN: plasma membrane; EXPRESSED IN: 24 plant structures; EXPRESSED DURING: 13 growth stages; CONTAINS InterPro DOMAIN/s: Epsin, N-terminal (InterPro:IPR001026), Epsin-like, N-terminal (InterPro:IPR013809), ENTH/VHS (InterPro:IPR008942); BEST Arabidopsis thaliana protei…
'35.1.41'	'not assigned.no ontology.hydroxyproline rich proteins'	HORVU6Hr1G005730,6	-10.0375	0	'(loc_os03g11200.1 : 358.0) no description available & (at1g04080 : 223.0) PRP39; INVOLVED IN: regulation of timing of transition from vegetative to reproductive phase; LOCATED IN: intracellular; EXPRESSED IN: 28 plant structures; EXPRESSED DURING: 13 growth stages; CONTAINS InterPro DOMAIN/s: RNA-processing protein, HAT helix (InterPro:IPR003107); BEST Arabidopsis thaliana protein match is: Tetr…
'35.1.5'	'not assigned.no ontology.pentatricopeptide (PPR) repeat-containing protein'	HORVU0Hr1G040540,13	-9.74483	2.9829e-105	'(loc_os02g02770.1 : 583.0) no description available & (at2g17033 : 189.0) pentatricopeptide (PPR) repeat-containing protein; CONTAINS InterPro DOMAIN/s: Pentatricopeptide repeat (InterPro:IPR002885), Smr protein/MutS2 C-terminal (InterPro:IPR002625); BEST Arabidopsis thaliana protein match is: Pentatricopeptide repeat (PPR) superfamily protein (TAIR:AT5G48730.1); Has 2363 Blast hits to 1770 prot…
'35.2'	'not assigned.unknown'	HORVU0Hr1G036550,1	-9.70908	3.79198e-29	' (original description: no original description)'
'35.2'	'not assigned.unknown'	HORVU0Hr1G039250,11	-9.9542	0	'(loc_os06g17840.1 : 1179.0) no description available & (at5g47690 : 563.0) binding; FUNCTIONS IN: binding; INVOLVED IN: biological_process unknown; LOCATED IN: mitochondrion, nucleus; EXPRESSED IN: cotyledon, guard cell, cultured cell; CONTAINS InterPro DOMAIN/s: Armadillo-type fold (InterPro:IPR016024); BEST Arabidopsis thaliana protein match is: ARM repeat superfamily protein (TAIR:AT1G77600.2…
'35.2'	'not assigned.unknown'	HORVU1Hr1G029950,4	-9.79442	2e-307	' (original description: no original description)'
'35.2'	'not assigned.unknown'	HORVU1Hr1G053020,15	-9.86882	2.647e-134	'(loc_os10g39910.1 : 839.0) no description available & (at2g27900 : 511.0) CONTAINS InterPro DOMAIN/s: Protein of unknown function DUF2451, C-terminal (InterPro:IPR019514), Vacuolar protein sorting-associated protein 54 (InterPro:IPR019515); Has 35333 Blast hits to 34131 proteins in 2444 species: Archae - 798; Bacteria - 22429; Metazoa - 974; Fungi - 991; Plants - 531; Viruses - 0; Other Eukaryot…
'35.2'	'not assigned.unknown'	HORVU1Hr1G055890,9	-10.1536	0	'(loc_os10g41240.1 : 206.0) no description available & (at2g35680 : 84.7) Phosphotyrosine protein phosphatases superfamily protein; FUNCTIONS IN: phosphatase activity, protein tyrosine phosphatase activity, protein tyrosine/serine/threonine phosphatase activity; INVOLVED IN: protein amino acid dephosphorylation, dephosphorylation; LOCATED IN: cellular_component unknown; EXPRESSED IN: 24 plant str…
'35.2'	'not assigned.unknown'	HORVU1Hr1G093720,8	-9.95855	0	'(loc_os05g51140.1 : 277.0) no description available & (at3g02420 : 175.0) unknown protein; FUNCTIONS IN: molecular_function unknown; INVOLVED IN: biological_process unknown; LOCATED IN: membrane; EXPRESSED IN: 25 plant structures; EXPRESSED DURING: 15 growth stages; CONTAINS InterPro DOMAIN/s: Uncharacterised protein family UPF0121 (InterPro:IPR005344); Has 72 Blast hits to 71 proteins in 25 spe…
'35.2'	'not assigned.unknown'	HORVU3Hr1G037470,19	-9.66356	2.71474e-86	'(loc_os01g16110.2 : 877.0) no description available & (at5g21160 : 182.0) LA RNA-binding protein; FUNCTIONS IN: molecular_function unknown; INVOLVED IN: biological_process unknown; LOCATED IN: cytosol, nucleus; EXPRESSED IN: 24 plant structures; EXPRESSED DURING: 13 growth stages; CONTAINS InterPro DOMAIN/s: Winged helix-turn-helix transcription repressor DNA-binding (InterPro:IPR011991), RNA-bi…
'35.2'	'not assigned.unknown'	HORVU3Hr1G113050,5	-9.7211	1.93439e-112	' (original description: no original description)'
'35.2'	'not assigned.unknown'	HORVU4Hr1G024220,3	-9.67243	0	' (original description: no original description)'
'35.2'	'not assigned.unknown'	HORVU4Hr1G053470,6	-10.0389	2.34034e-62	'(loc_os03g19580.1 : 276.0) no description available & (at3g62370 : 161.0) heme binding; FUNCTIONS IN: heme binding; INVOLVED IN: oxidation reduction; LOCATED IN: endomembrane system; EXPRESSED IN: 23 plant structures; EXPRESSED DURING: 13 growth stages; CONTAINS InterPro DOMAIN/s: Cytochrome c-552/DMSO reductase-like, haem-binding domain (InterPro:IPR019020); Has 36 Blast hits to 36 proteins in …
'35.2'	'not assigned.unknown'	HORVU4Hr1G089540,4	-9.58496	6.00336e-84	' no hits & (original description: no original description)'
'35.2'	'not assigned.unknown'	HORVU5Hr1G114620,3	-9.60177	1.02507e-114	'(loc_os03g60920.1 : 421.0) no description available & (at3g13440 : 240.0) S-adenosyl-L-methionine-dependent methyltransferases superfamily protein; FUNCTIONS IN: methyltransferase activity, nucleic acid binding; INVOLVED IN: methylation, acetate biosynthetic process from carbon monoxide, methanol oxidation; LOCATED IN: cellular_component unknown; EXPRESSED IN: 24 plant structures; EXPRESSED DURI…
'35.2'	'not assigned.unknown'	HORVU5Hr1G121600,3	-9.73471	3.0008e-139	'(loc_os03g63280.1 : 427.0) no description available & (at4g19970 : 256.0) CONTAINS InterPro DOMAIN/s: Nucleotide-diphospho-sugar transferase, predicted (InterPro:IPR005069); BEST Arabidopsis thaliana protein match is: Nucleotide-diphospho-sugar transferase family protein (TAIR:AT5G44820.1); Has 801 Blast hits to 466 proteins in 35 species: Archae - 0; Bacteria - 0; Metazoa - 2; Fungi - 0; Plants…
'35.2'	'not assigned.unknown'	HORVU6Hr1G022950,13	-9.59991	0	'(loc_os02g05870.2 : 347.0) no description available & (at1g53760 : 226.0) unknown protein; FUNCTIONS IN: molecular_function unknown; INVOLVED IN: biological_process unknown; LOCATED IN: mitochondrion, plastid; EXPRESSED IN: 23 plant structures; EXPRESSED DURING: 13 growth stages; CONTAINS InterPro DOMAIN/s: Protein of unknown function DUF2343 (InterPro:IPR018786). & (reliability: 452.0) & (origi…
'35.2'	'not assigned.unknown'	HORVU6Hr1G083600,2	-9.85175	0	' (original description: no original description)'
'35.2'	'not assigned.unknown'	HORVU7Hr1G024450,4	-9.81378	0	'(loc_os08g16880.1 : 209.0) no description available & (at5g25080 : 122.0) Sas10/Utp3/C1D family; CONTAINS InterPro DOMAIN/s: Sas10/Utp3/C1D (InterPro:IPR007146), Exosome-associated factor Rrp47/DNA strand repair C1D (InterPro:IPR011082); Has 1807 Blast hits to 1807 proteins in 277 species: Archae - 0; Bacteria - 0; Metazoa - 736; Fungi - 347; Plants - 385; Viruses - 0; Other Eukaryotes - 339 (so…
'35.2'	'not assigned.unknown'	HORVU7Hr1G027240,5	-9.69	0	'(loc_os01g22500.1 : 266.0) no description available & (at5g30490 : 158.0) FUNCTIONS IN: molecular_function unknown; INVOLVED IN: biological_process unknown; LOCATED IN: cellular_component unknown; EXPRESSED IN: 22 plant structures; EXPRESSED DURING: 13 growth stages; CONTAINS InterPro DOMAIN/s: Craniofacial development protein 1/Bucentaur (InterPro:IPR011421); Has 333 Blast hits to 324 proteins …
'35.2'	'not assigned.unknown'	HORVU7Hr1G053720,6	-9.79116	1.01065e-183	'(loc_os08g41670.1 : 421.0) no description available & (at5g36290 : 367.0) Uncharacterized protein family (UPF0016); FUNCTIONS IN: molecular_function unknown; INVOLVED IN: biological_process unknown; LOCATED IN: endomembrane system, membrane; EXPRESSED IN: 23 plant structures; EXPRESSED DURING: 15 growth stages; CONTAINS InterPro DOMAIN/s: Uncharacterised protein family UPF0016 (InterPro:IPR00172…
'35.2'	'not assigned.unknown'	HORVU7Hr1G092450,11	-9.64024	4.01062e-62	'(loc_os10g19334.1 : 860.0) no description available & (at4g34260 : 592.0) FUC95A; FUNCTIONS IN: 1,2-alpha-L-fucosidase activity; INVOLVED IN: biological_process unknown; LOCATED IN: endomembrane system; EXPRESSED IN: 22 plant structures; EXPRESSED DURING: 13 growth stages; CONTAINS InterPro DOMAIN/s: Six-hairpin glycosidase-like (InterPro:IPR008928), Uncharacterised conserved protein UCP007663 (…
'35.2'	'not assigned.unknown'	HORVU7Hr1G095020,10	-10.1712	0	'(loc_os06g49800.1 : 333.0) no description available & (at4g11860 : 253.0) FUNCTIONS IN: molecular_function unknown; INVOLVED IN: biological_process unknown; LOCATED IN: cytosol, nucleus, plasma membrane; EXPRESSED IN: 25 plant structures; EXPRESSED DURING: 14 growth stages; CONTAINS InterPro DOMAIN/s: Protein of unknown function DUF544 (InterPro:IPR007518), Ubiquitin interacting motif (InterPro:…
'35.2'	'not assigned.unknown'	HORVU7Hr1G115520,4	-9.76818	1.21968e-172	'(loc_os06g43650.2 : 275.0) no description available & (at2g25310 : 204.0) FUNCTIONS IN: carbohydrate binding; INVOLVED IN: biological_process unknown; LOCATED IN: endomembrane system; EXPRESSED IN: 22 plant structures; EXPRESSED DURING: 13 growth stages; CONTAINS InterPro DOMAIN/s: Carbohydrate-binding-like fold (InterPro:IPR013784), Protein of unknown function DUF2012 (InterPro:IPR019008); BEST…
'35.2'	'not assigned.unknown'	HORVU7Hr1G119590,4	-10.1497	7.94716e-111	'(loc_os06g51510.1 : 253.0) no description available & (at2g20760 : 170.0) Clathrin light chain protein; FUNCTIONS IN: structural molecule activity; INVOLVED IN: intracellular protein transport, vesicle-mediated transport; LOCATED IN: plasma membrane; EXPRESSED IN: 23 plant structures; EXPRESSED DURING: 15 growth stages; CONTAINS InterPro DOMAIN/s: Clathrin light chain (InterPro:IPR000996); BEST …
'35.2'	'not assigned.unknown'	HORVU5Hr1G034880,10	-10.2155	0	'(loc_os12g09610.1 : 364.0) no description available & (at5g18420 : 169.0) unknown protein; FUNCTIONS IN: molecular_function unknown; INVOLVED IN: biological_process unknown; LOCATED IN: cellular_component unknown; EXPRESSED IN: 25 plant structures; EXPRESSED DURING: 15 growth stages; CONTAINS InterPro DOMAIN/s: Protein of unknown function DUF2363 (InterPro:IPR019312); Has 35333 Blast hits to 341…
'35.2'	'not assigned.unknown'	HORVU7Hr1G080900,10	-7.96578	1.50399e-28	'(at1g67140 : 838.0) SWEETIE (SWEETIE); FUNCTIONS IN: binding; INVOLVED IN: trehalose metabolic process, carbohydrate metabolic process, starch metabolic process; LOCATED IN: cytosol; EXPRESSED IN: 25 plant structures; EXPRESSED DURING: 13 growth stages; CONTAINS InterPro DOMAIN/s: Armadillo-type fold (InterPro:IPR016024). & (loc_os06g30901.1 : 581.0) no description available & (reliability: 1676…

## Sheet: C1-22_10d roots_upregulated
List of upregulated genes identified in 10-day-old roots of ckx1 mutant line C1-22. Functional annotation was performed using Mercator sequence annotation tool.
BINCODE	NAME	IDENTIFIER	Log2 fold change	Pvalue	DESCRIPTION
'1.1.2'	'PS.lightreaction.photosystem I'	HORVU2Hr1G107120,1	5.50892	6.59391050369871e-10	'(loc_os04g53612.1 : 541.0) no description available & (at3g21740 : 338.0) ACCUMULATION OF PHOTOSYSTEM ONE 4; ACCUMULATION OF PHOTOSYSTEM ONE 4 (APO4); INVOLVED IN: biological_process unknown; LOCATED IN: mitochondrion; EXPRESSED IN: 22 plant structures; EXPRESSED DURING: 13 growth stages; CONTAINS InterPro DOMAIN/s: Protein of unknown function DUF794, plant (InterPro:IPR008512); BEST Arabidopsis…
'1.1.30'	'PS.lightreaction.state transition'	HORVU2Hr1G058820,6	6.21008	3.50712754342756e-13	'(loc_os07g38070.1 : 194.0) no description available & (q8l4h4|nork_medtr : 146.0) Nodulation receptor kinase precursor (EC 2.7.11.1) (Does not make infections protein 2) (Symbiosis receptor-like kinase) (MtSYMRK) - Medicago truncatula (Barrel medic) & (at3g01300 : 89.0) Protein kinase superfamily protein; FUNCTIONS IN: protein serine/threonine kinase activity, protein kinase activity, kinase act…
'1.1.30'	'PS.lightreaction.state transition'	HORVU2Hr1G075030,5	6.98702	7.65625400857468e-17	'(loc_os04g35080.1 : 470.0) no description available & (at1g01540 : 398.0) Protein kinase superfamily protein; FUNCTIONS IN: protein serine/threonine kinase activity, protein kinase activity, kinase activity, ATP binding; INVOLVED IN: protein amino acid phosphorylation; LOCATED IN: plasma membrane; EXPRESSED IN: 23 plant structures; EXPRESSED DURING: 13 growth stages; CONTAINS InterPro DOMAIN/s: …
'2.2.1.5'	'major CHO metabolism.degradation.sucrose.Susy'	HORVU7Hr1G033230,7	3.53575	0.000129576247787154	'(p31922|sus1_horvu : 1000.0) Sucrose synthase 1 (EC 2.4.1.13) (Sucrose-UDP glucosyltransferase 1) - Hordeum vulgare (Barley) & (loc_os06g09450.7 : 954.0) no description available & (at3g43190 : 812.0) Encodes a protein with sucrose synthase activity (SUS4).; sucrose synthase 4 (SUS4); FUNCTIONS IN: UDP-glycosyltransferase activity, sucrose synthase activity, transferase activity, transferring gl…
'3.3'	'minor CHO metabolism.sugar alcohols'	HORVU6Hr1G030140,3	4.95889	5.87986912575848e-08	'(loc_os02g08130.3 : 478.0) no description available & (at4g30310 : 427.0) FGGY family of carbohydrate kinase; FUNCTIONS IN: carbohydrate kinase activity, phosphotransferase activity, alcohol group as acceptor; INVOLVED IN: carbohydrate metabolic process; LOCATED IN: chloroplast; EXPRESSED IN: 23 plant structures; EXPRESSED DURING: 15 growth stages; CONTAINS InterPro DOMAIN/s: Carbohydrate kinase…
'3.5'	'minor CHO metabolism.others'	HORVU3Hr1G084600,5	3.88474	7.71719556229388e-05	'(loc_os01g63840.2 : 196.0) no description available & (at5g03770 : 126.0) Encodes a putative KDO (3-deoxy-D-manno-octulosonate) transferase; KDO transferase A (KDTA); FUNCTIONS IN: transferase activity, transferring glycosyl groups; INVOLVED IN: biosynthetic process, carbohydrate metabolic process; LOCATED IN: mitochondrion; EXPRESSED IN: 8 plant structures; EXPRESSED DURING: 4 anthesis, petal d…
'4.1.5'	'glycolysis.cytosolic branch.pyrophosphate-fructose-6-P phosphotransferase'	HORVU5Hr1G019030,10	4.74374	8.52743519923065e-09	'(loc_os08g25720.1 : 833.0) no description available & (q41140|pfpa_ricco : 660.0) Pyrophosphate--fructose 6-phosphate 1-phosphotransferase alpha subunit (EC 2.7.1.90) (PFP) (6-phosphofructokinase, pyrophosphate dependent) (Pyrophosphate-dependent 6-phosphofructose-1-kinase) (PPi-PFK) - Ricinus communis (Castor bean) & (at1g76550 : 624.0) Phosphofructokinase family protein; CONTAINS InterPro DOMA…
'4.1.5'	'glycolysis.cytosolic branch.pyrophosphate-fructose-6-P phosphotransferase'	HORVU5Hr1G019030,40	4.62527	9.38775320256718e-07	'(loc_os08g25720.1 : 833.0) no description available & (q41140|pfpa_ricco : 660.0) Pyrophosphate--fructose 6-phosphate 1-phosphotransferase alpha subunit (EC 2.7.1.90) (PFP) (6-phosphofructokinase, pyrophosphate dependent) (Pyrophosphate-dependent 6-phosphofructose-1-kinase) (PPi-PFK) - Ricinus communis (Castor bean) & (at1g76550 : 624.0) Phosphofructokinase family protein; CONTAINS InterPro DOMA…
'4.1.8'	'glycolysis.cytosolic branch.glyceraldehyde 3-phosphate dehydrogenase (GAP-DH)'	HORVU7Hr1G074690,8	3.99406	4.45434548395324e-05	'(p26517|g3px_horvu : 494.0) Glyceraldehyde-3-phosphate dehydrogenase, cytosolic (EC 1.2.1.12) - Hordeum vulgare (Barley) & (loc_os08g03290.4 : 462.0) no description available & (at1g13440 : 449.0) glyceraldehyde-3-phosphate dehydrogenase C2 (GAPC2); FUNCTIONS IN: copper ion binding, glyceraldehyde-3-phosphate dehydrogenase activity, zinc ion binding; INVOLVED IN: response to oxidative stress, re…
'4.2.8'	'glycolysis.plastid branch.glyceraldehyde 3-phosphate dehydrogenase (GAP-DH)'	HORVU6Hr1G032070,1	3.74398	0.000148868386575275	'(loc_os02g07490.1 : 597.0) no description available & (at1g79530 : 563.0) Encodes one of the chloroplast/plastid localized GAPDH isoforms (GAPCp1/At1g79530 and GAPCp2/At1g16300). gapcp double mutants display a drastic phenotype of arrested root development, dwarfism and sterility. GAPCps are important for the synthesis of serine in roots.; glyceraldehyde-3-phosphate dehydrogenase of plastid 1 (G…
'5.3'	'fermentation.ADH'	HORVU4Hr1G016810,14	7.69668	2.52811840425489e-18	'(p05336|adh1_horvu : 127.0) Alcohol dehydrogenase 1 (EC 1.1.1.1) - Hordeum vulgare (Barley) & (loc_os11g10480.4 : 121.0) no description available & (at1g77120 : 105.0) Catalyzes the reduction of acetaldehyde using NADH as reductant. Requires zinc for activity. Dimer. Anaerobic response polypeptide (ANP). Fermentation. The protein undergoes thiolation following treatment with the oxidant tert-but…
'5.3'	'fermentation.ADH'	HORVU4Hr1G016810,16	2.79179	0.000171086217898529	'(p05336|adh1_horvu : 127.0) Alcohol dehydrogenase 1 (EC 1.1.1.1) - Hordeum vulgare (Barley) & (loc_os11g10480.4 : 121.0) no description available & (at1g77120 : 105.0) Catalyzes the reduction of acetaldehyde using NADH as reductant. Requires zinc for activity. Dimer. Anaerobic response polypeptide (ANP). Fermentation. The protein undergoes thiolation following treatment with the oxidant tert-but…
'5.3'	'fermentation.ADH'	HORVU4Hr1G016770,6	2.46529	0.000279512206716532	'(p10848|adh3_horvu : 689.0) Alcohol dehydrogenase 3 (EC 1.1.1.1) - Hordeum vulgare (Barley) & (loc_os11g10510.1 : 652.0) no description available & (at1g77120 : 571.0) Catalyzes the reduction of acetaldehyde using NADH as reductant. Requires zinc for activity. Dimer. Anaerobic response polypeptide (ANP). Fermentation. The protein undergoes thiolation following treatment with the oxidant tert-but…
'5.3'	'fermentation.ADH'	HORVU4Hr1G016780,3	3.5332	9.04200125310542e-05	'(p10848|adh3_horvu : 266.0) Alcohol dehydrogenase 3 (EC 1.1.1.1) - Hordeum vulgare (Barley) & (loc_os11g10510.1 : 259.0) no description available & (at1g77120 : 232.0) Catalyzes the reduction of acetaldehyde using NADH as reductant. Requires zinc for activity. Dimer. Anaerobic response polypeptide (ANP). Fermentation. The protein undergoes thiolation following treatment with the oxidant tert-but…
'8.1.7'	'TCA / org transformation.TCA.succinate dehydrogenase'	HORVU2Hr1G061040,10	4.35916	5.24708865479295e-06	'(q6zdy8|dhsa_orysa : 935.0) Succinate dehydrogenase [ubiquinone] flavoprotein subunit, mitochondrial precursor (EC 1.3.5.1) (FP) (Flavoprotein subunit of complex II) - Oryza sativa (Rice) & (loc_os07g04240.1 : 935.0) no description available & (at5g66760 : 908.0) One of two genes in Arabidopsis that encode a flavoprotein subunit of the mitochondrial succinate dehydrogenase complex.; succinate de…
'10.1.1.20'	'cell wall.precursor synthesis.NDP sugar pyrophosphorylase.multiple NDP-Sugars'	HORVU3Hr1G058350,32	4.56458	2.05901153376852e-06	'(loc_os06g48760.2 : 117.0) no description available & (at5g52560 : 108.0) Encodes a protein with UTP:sugar 1-phosphate uridylyltransferase activity, which has been shown to use a wide range of substrates including glucose-1-P, galactose-1-P, xylose-1-P, arabinose-1-P and glucuronate-1-P. The enzyme was shown to require Mg2+ or Mn2+ for activity. Mutations in USP can lead to a complete loss of ma…
'10.2'	'cell wall.cellulose synthesis'	HORVU3Hr1G109930,13	5.08502	7.09955922623489e-08	'(loc_os08g33740.1 : 798.0) no description available & (at5g03760 : 602.0) encodes a beta-mannan synthase that is required for agrobacterium-mediated plant genetic transformation involves a complex interaction between the bacterium and the host plant. 3' UTR is involved in transcriptional regulation and the gene is expressed in the elongation zone of the root.; ATCSLA09; CONTAINS InterPro DOMAIN/…
'10.2.1'	'cell wall.cellulose synthesis.cellulose synthase'	HORVU1Hr1G039250,7	4.55257	2.8307501192768e-06	'(loc_os10g32980.1 : 360.0) no description available & (at5g44030 : 332.0) Encodes a cellulose synthase involved in secondary cell wall biosynthesis. Confers resistance towards bacterial and fungal pathogens, independent of salicylic acid, ethylene and jasmonate signaling.; cellulose synthase A4 (CESA4); FUNCTIONS IN: cellulose synthase activity, transferase activity, transferring glycosyl groups…
'10.3'	'cell wall.hemicellulose synthesis'	HORVU5Hr1G108670,4	4.17395	1.2780339095864e-05	'(loc_os03g58900.1 : 731.0) no description available & (at1g74800 : 583.0) Galactosyltransferase family protein; FUNCTIONS IN: transferase activity, transferring hexosyl groups, transferase activity, transferring glycosyl groups; INVOLVED IN: protein amino acid glycosylation; LOCATED IN: membrane; EXPRESSED IN: 23 plant structures; EXPRESSED DURING: 15 growth stages; CONTAINS InterPro DOMAIN/s: G…
'10.3'	'cell wall.hemicellulose synthesis'	HORVU6Hr1G078650,9	5.01027	2.5205163619092e-07	'(loc_os02g52560.1 : 907.0) no description available & (at2g03220 : 479.0) member of Glycosyltransferase Family- 37; fucosyltransferase 1 (FT1); FUNCTIONS IN: transferase activity, transferring glycosyl groups, fucosyltransferase activity; INVOLVED IN: plant-type cell wall biogenesis, xyloglucan biosynthetic process; LOCATED IN: membrane; EXPRESSED IN: 23 plant structures; EXPRESSED DURING: 14 gr…
'10.3'	'cell wall.hemicellulose synthesis'	HORVU4Hr1G075720,9	3.65467	0.000215193556660398	'(loc_os03g58920.1 : 154.0) no description available & (at5g62620 : 134.0) Galactosyltransferase family protein; FUNCTIONS IN: transferase activity, transferring hexosyl groups, sugar binding, galactosyltransferase activity; INVOLVED IN: protein amino acid glycosylation; EXPRESSED IN: 22 plant structures; EXPRESSED DURING: 13 growth stages; CONTAINS InterPro DOMAIN/s: Galectin, carbohydrate recog…
'10.5.3'	'cell wall.cell wall proteins.LRR'	HORVU7Hr1G079000,10	6.08285	1.17852052847623e-12	'(loc_os08g01070.3 : 300.0) no description available & (at4g18670 : 81.3) Leucine-rich repeat (LRR) family protein; FUNCTIONS IN: structural constituent of cell wall; LOCATED IN: endomembrane system; EXPRESSED IN: 22 plant structures; EXPRESSED DURING: 12 growth stages; CONTAINS InterPro DOMAIN/s: Leucine-rich repeat-containing N-terminal domain, type 2 (InterPro:IPR013210); BEST Arabidopsis thal…
'10.6.2'	'cell wall.degradation.mannan-xylose-arabinose-fucose'	HORVU4Hr1G070260,15	4.07002	4.65472007094834e-05	'(loc_os03g10478.1 : 892.0) no description available & (at4g33840 : 557.0) Glycosyl hydrolase family 10 protein; FUNCTIONS IN: cation binding, hydrolase activity, hydrolyzing O-glycosyl compounds, catalytic activity; INVOLVED IN: carbohydrate metabolic process; LOCATED IN: endomembrane system; CONTAINS InterPro DOMAIN/s: Glycoside hydrolase, family 10 (InterPro:IPR001000), Carbohydrate-binding, C…
'10.6.2'	'cell wall.degradation.mannan-xylose-arabinose-fucose'	HORVU4Hr1G070260,11	3.98147	4.9304407852661e-06	'(loc_os03g10478.1 : 892.0) no description available & (at4g33840 : 557.0) Glycosyl hydrolase family 10 protein; FUNCTIONS IN: cation binding, hydrolase activity, hydrolyzing O-glycosyl compounds, catalytic activity; INVOLVED IN: carbohydrate metabolic process; LOCATED IN: endomembrane system; CONTAINS InterPro DOMAIN/s: Glycoside hydrolase, family 10 (InterPro:IPR001000), Carbohydrate-binding, C…
'10.6.3'	'cell wall.degradation.pectate lyases and polygalacturonases'	HORVU2Hr1G103020,41	4.94436	6.44334700645162e-08	'(loc_os08g23790.1 : 606.0) no description available & (at4g18180 : 341.0) Pectin lyase-like superfamily protein; FUNCTIONS IN: polygalacturonase activity; INVOLVED IN: carbohydrate metabolic process; LOCATED IN: endomembrane system; CONTAINS InterPro DOMAIN/s: Pectin lyase fold/virulence factor (InterPro:IPR011050), Pectin lyase fold (InterPro:IPR012334), Glycoside hydrolase, family 28 (InterPro…
'11.1.15'	'lipid metabolism.FA synthesis and FA elongation.ACP desaturase'	HORVU3Hr1G091320,1	3.75276	1.47466954136066e-09	'(loc_os01g65830.1 : 550.0) no description available & (p46253|stad_soltu : 450.0) Acyl-[acyl-carrier-protein] desaturase, chloroplast precursor (EC 1.14.19.2) (Stearoyl-ACP desaturase) - Solanum tuberosum (Potato) & (at3g02630 : 448.0) Plant stearoyl-acyl-carrier-protein desaturase family protein; FUNCTIONS IN: acyl-[acyl-carrier-protein] desaturase activity, oxidoreductase activity, transition …
'11.1.15'	'lipid metabolism.FA synthesis and FA elongation.ACP desaturase'	HORVU3Hr1G091320,2	3.17065	3.05125872965419e-05	'(loc_os01g65830.1 : 550.0) no description available & (p46253|stad_soltu : 450.0) Acyl-[acyl-carrier-protein] desaturase, chloroplast precursor (EC 1.14.19.2) (Stearoyl-ACP desaturase) - Solanum tuberosum (Potato) & (at3g02630 : 448.0) Plant stearoyl-acyl-carrier-protein desaturase family protein; FUNCTIONS IN: acyl-[acyl-carrier-protein] desaturase activity, oxidoreductase activity, transition …
'11.1.8'	'lipid metabolism.FA synthesis and FA elongation.acyl coa ligase'	HORVU7Hr1G006370,36	3.7752	0.000103025705674607	'(loc_os06g02160.4 : 1164.0) no description available & (at5g35930 : 607.0) AMP-dependent synthetase and ligase family protein; FUNCTIONS IN: phosphopantetheine binding, acyl carrier activity, catalytic activity, AMP binding, cofactor binding; INVOLVED IN: metabolic process; LOCATED IN: cellular_component unknown; EXPRESSED IN: 23 plant structures; EXPRESSED DURING: 13 growth stages; CONTAINS Int…
'11.1.9'	'lipid metabolism.FA synthesis and FA elongation.long chain fatty acid CoA ligase'	HORVU4Hr1G025820,12	4.41025	2.98755375704322e-06	'(loc_os12g04990.1 : 1167.0) no description available & (at3g05970 : 1040.0) encode peroxisomal long-chain acyl-CoA synthetase (LACS) isozymes; long-chain acyl-CoA synthetase 6 (LACS6); FUNCTIONS IN: long-chain fatty acid-CoA ligase activity; INVOLVED IN: long-chain fatty acid metabolic process; LOCATED IN: membrane; EXPRESSED IN: 24 plant structures; EXPRESSED DURING: 16 growth stages; CONTAINS …
'11.1.9'	'lipid metabolism.FA synthesis and FA elongation.long chain fatty acid CoA ligase'	HORVU5Hr1G040740,9	4.05091	2.82368180240312e-05	'(loc_os12g04990.1 : 687.0) no description available & (at3g05970 : 638.0) encode peroxisomal long-chain acyl-CoA synthetase (LACS) isozymes; long-chain acyl-CoA synthetase 6 (LACS6); FUNCTIONS IN: long-chain fatty acid-CoA ligase activity; INVOLVED IN: long-chain fatty acid metabolic process; LOCATED IN: membrane; EXPRESSED IN: 24 plant structures; EXPRESSED DURING: 16 growth stages; CONTAINS In…
'11.8.1'	'lipid metabolism.'exotics' (steroids, squalene etc).sphingolipids'	HORVU7Hr1G038160,3	3.7234	0.000193778574962936	'(loc_os06g12250.1 : 322.0) no description available & (at1g69640 : 293.0) Encodes one of the two redundant sphingoid base hydroxylases (SBH). Involved in sphingolipid trihydroxy long-chain base (4-hydroxysphinganine) biosynthesis. Double mutants of SBHs were dwarfed and not able to progress from vegetative to reproductive growth.; sphingoid base hydroxylase 1 (SBH1); CONTAINS InterPro DOMAIN/s: …
'11.9.2'	'lipid metabolism.lipid degradation.lipases'	HORVU2Hr1G112400,12	5.84568	3.7323819557146e-11	'(loc_os02g15230.1 : 304.0) no description available & (at2g27360 : 140.0) GDSL-like Lipase/Acylhydrolase superfamily protein; FUNCTIONS IN: hydrolase activity, acting on ester bonds, carboxylesterase activity; INVOLVED IN: glycerol biosynthetic process, lipid metabolic process; LOCATED IN: endomembrane system; EXPRESSED IN: 20 plant structures; EXPRESSED DURING: 13 growth stages; CONTAINS InterP…
'11.9.3.3'	'lipid metabolism.lipid degradation.lysophospholipases.glycerophosphodiester phosphodiesterase'	HORVU4Hr1G015590,25	4.29402	5.79729843813913e-06	'(loc_os11g12800.1 : 164.0) no description available & (at1g71340 : 119.0) PLC-like phosphodiesterases superfamily protein; FUNCTIONS IN: phosphoric diester hydrolase activity, glycerophosphodiester phosphodiesterase activity; INVOLVED IN: glycerol metabolic process, lipid metabolic process; LOCATED IN: cellular_component unknown; EXPRESSED IN: 23 plant structures; EXPRESSED DURING: 13 growth sta…
'11.9.3.3'	'lipid metabolism.lipid degradation.lysophospholipases.glycerophosphodiester phosphodiesterase'	HORVU7Hr1G054980,9	3.7697	0.000149589900394857	'(loc_os08g42390.1 : 453.0) no description available & (at5g41080 : 315.0) PLC-like phosphodiesterases superfamily protein; FUNCTIONS IN: phosphoric diester hydrolase activity, glycerophosphodiester phosphodiesterase activity; INVOLVED IN: glycerol metabolic process, lipid metabolic process; EXPRESSED IN: 23 plant structures; EXPRESSED DURING: 14 growth stages; CONTAINS InterPro DOMAIN/s: PLC-lik…
'12.4'	'N-metabolism.misc'	HORVU2Hr1G065180,16	3.83944	9.21423971564726e-05	'(loc_os04g20990.1 : 193.0) no description available & (at3g63510 : 157.0) FMN-linked oxidoreductases superfamily protein; FUNCTIONS IN: tRNA dihydrouridine synthase activity, FAD binding, catalytic activity; INVOLVED IN: regulation of nitrogen utilization, tRNA processing, oxidation reduction, metabolic process; EXPRESSED IN: 18 plant structures; EXPRESSED DURING: 13 growth stages; CONTAINS Inte…
'13.1.1.2.1'	'amino acid metabolism.synthesis.central amino acid metabolism.aspartate.aspartate aminotransferase'	HORVU1Hr1G074590,16	6.5974	4.17353465773855e-15	'(loc_os01g65090.2 : 459.0) no description available & (at2g22250 : 379.0) Encodes a prokaryotic-type plastidic aspartate aminotransferase with glutamate/aspartate-prephenate aminotransferase (PAT) activity.; aspartate aminotransferase (AAT); FUNCTIONS IN: L-aspartate:2-oxoglutarate aminotransferase activity, transferase activity, transferring nitrogenous groups, pyridoxal phosphate binding, cata…
'13.1.1.3.1'	'amino acid metabolism.synthesis.central amino acid metabolism.alanine.alanine aminotransferase'	HORVU1Hr1G018540,4	2.64494	3.12902702074529e-05	'(p52894|ala2_horvu : 922.0) Alanine aminotransferase 2 (EC 2.6.1.2) (GPT) (Glutamic--pyruvic transaminase 2) (Glutamic--alanine transaminase 2) (ALAAT-2) - Hordeum vulgare (Barley) & (loc_os10g25130.1 : 827.0) no description available & (at1g17290 : 731.0) Encodes for alanine aminotransferase (ALAAT1), involved in alanine catabolism during plants recovery from hypoxia; alanine aminotransferas (A…
'13.1.3.4.12'	'amino acid metabolism.synthesis.aspartate family.methionine.homocysteine S-methyltransferase'	HORVU7Hr1G052530,12	3.62373	0.000221233384809531	'(loc_os08g40580.1 : 209.0) no description available & (at3g17365 : 159.0) S-adenosyl-L-methionine-dependent methyltransferases superfamily protein; FUNCTIONS IN: methyltransferase activity, catalytic activity; INVOLVED IN: metabolic process; LOCATED IN: cellular_component unknown; EXPRESSED IN: 23 plant structures; EXPRESSED DURING: 13 growth stages; CONTAINS InterPro DOMAIN/s: Methyltransferase…
'13.1.5.3.1'	'amino acid metabolism.synthesis.serine-glycine-cysteine group.cysteine.OASTL'	HORVU3Hr1G047030,26	4.8825	9.39195595031119e-08	'(q9xea6|cysk1_orysa : 117.0) Cysteine synthase (EC 2.5.1.47) (O-acetylserine sulfhydrylase) (O-acetylserine (Thiol)-lyase) (CSase) (OAS-TL) - Oryza sativa (Rice) & (loc_os12g42980.2 : 117.0) no description available & (at3g22460 : 106.0) Encodes a member of a family of genes with O-acetylserine(thiol)lyase activity.; O-acetylserine (thiol) lyase (OAS-TL) isoform A2 (OASA2); FUNCTIONS IN: pyridox…
'13.1.5.3.1'	'amino acid metabolism.synthesis.serine-glycine-cysteine group.cysteine.OASTL'	HORVU5Hr1G082120,12	4.73274	3.53919505971745e-07	'(p38076|cysk_wheat : 197.0) Cysteine synthase (EC 2.5.1.47) (O-acetylserine sulfhydrylase) (O-acetylserine (Thiol)-lyase) (CSase A) (OAS-TL A) - Triticum aestivum (Wheat) & (loc_os12g42980.2 : 189.0) no description available & (at4g14880 : 170.0) Encodes a cytosolic isoform of cytosolic O-acetylserine(thiol)lyase, a key enzyme in cysteine biosynthesis and for the fixation of inorganic sulfide. I…
'13.2.6.3'	'amino acid metabolism.degradation.aromatic aa.tryptophan'	HORVU1Hr1G049960,3	4.7061	5.69260660270029e-07	'(loc_os12g16350.9 : 454.0) no description available & (at5g65940 : 348.0) hydrolyzes beta-hydroxyisobutyryl-CoA; beta-hydroxyisobutyryl-CoA hydrolase 1 (CHY1); CONTAINS InterPro DOMAIN/s: Crotonase, core (InterPro:IPR001753); BEST Arabidopsis thaliana protein match is: ATP-dependent caseinolytic (Clp) protease/crotonase family protein (TAIR:AT2G30660.1); Has 31609 Blast hits to 31599 proteins in…
'16.2'	'secondary metabolism.phenylpropanoids'	HORVU1Hr1G051190,4	4.38988	2.95933877794378e-06	'(loc_os08g04770.1 : 214.0) no description available & (at4g19010 : 160.0) AMP-dependent synthetase and ligase family protein; FUNCTIONS IN: 4-coumarate-CoA ligase activity; INVOLVED IN: metabolic process; EXPRESSED IN: 21 plant structures; EXPRESSED DURING: 11 growth stages; CONTAINS InterPro DOMAIN/s: AMP-binding, conserved site (InterPro:IPR020845), AMP-dependent synthetase/ligase (InterPro:IP…
'16.2'	'secondary metabolism.phenylpropanoids'	HORVU1Hr1G073330,3	4.02684	5.98392778152861e-05	'(loc_os05g37660.1 : 736.0) no description available & (at5g01210 : 434.0) HXXXD-type acyl-transferase family protein; FUNCTIONS IN: transferase activity, transferring acyl groups other than amino-acyl groups, transferase activity; INVOLVED IN: biological_process unknown; LOCATED IN: cellular_component unknown; EXPRESSED IN: 22 plant structures; EXPRESSED DURING: 13 growth stages; CONTAINS InterP…
'16.2'	'secondary metabolism.phenylpropanoids'	HORVU2Hr1G002440,10	5.96802	1.28183250646452e-10	'(loc_os10g20610.1 : 610.0) no description available & (at3g09220 : 476.0) putative laccase, a member of laccase family of genes (17 members in Arabidopsis).; laccase 7 (LAC7); FUNCTIONS IN: laccase activity; INVOLVED IN: oxidation reduction, lignin catabolic process; LOCATED IN: endomembrane system, apoplast; EXPRESSED IN: 18 plant structures; EXPRESSED DURING: 7 growth stages; CONTAINS InterPro…
'16.2'	'secondary metabolism.phenylpropanoids'	HORVU2Hr1G002440,2	4.51267	4.6729238104274e-06	'(loc_os10g20610.1 : 610.0) no description available & (at3g09220 : 476.0) putative laccase, a member of laccase family of genes (17 members in Arabidopsis).; laccase 7 (LAC7); FUNCTIONS IN: laccase activity; INVOLVED IN: oxidation reduction, lignin catabolic process; LOCATED IN: endomembrane system, apoplast; EXPRESSED IN: 18 plant structures; EXPRESSED DURING: 7 growth stages; CONTAINS InterPro…
[truncated: 385 more rows]

## Sheet: C1-22_10d roots_downregulated
List of downregulated genes identified in 10-day-old roots of ckx1 mutant line C1-22. Functional annotation was performed using Mercator sequence annotation tool.
[truncated: 386 more rows]
