# Supplementary material for: Knockout of the HvCKX1 or HvCKX3 Gene in Barley (Hordeum vulgare L.) by RNA-Guided Cas9 Nuclease Affects the Regulation of Cytokinin Metabolism and Root Morphology
Source: Cells. 2019 Jul 26;8(8):782. doi: 10.3390/cells8080782 (PMC6721474; doi:10.3390/cells8080782)
Supplement: Supplementary file 1 [file cells-08-00782-s001.zip › File_S2.xlsx]

## Sheet: C3-21 7DAP_upregulated
List of upregulated genes identified in 7DAP spikes of ckx3 mutant line C1-21. Functional annotation was performed using Mercator sequence annotation tool.
BINCODE	NAME	IDENTIFIER	Log2 fold change	Pvalue	DESCRIPTION
'1.1.1.2'	'PS.lightreaction.photosystem II.PSII polypeptide subunits'	HORVU2Hr1G038960,3	12.7814	0	'(q40070|psbr_horvu : 155.0) Photosystem II 10 kDa polypeptide, chloroplast precursor - Hordeum vulgare (Barley) & (loc_os07g05360.1 : 146.0) no description available & (at1g79040 : 117.0) Encodes for the 10 kDa PsbR subunit of photosystem II (PSII). This subunit appears to be involved in the stable assembly of PSII, particularly that of the oxygen-evolving complex subunit PsbP. Mutants defective…
'1.1.1.2'	'PS.lightreaction.photosystem II.PSII polypeptide subunits'	HORVU4Hr1G050630,4	10.1687	1.47273e-116	'(loc_os03g21560.1 : 186.0) no description available & (at1g03600 : 169.0) PSB27; FUNCTIONS IN: molecular_function unknown; INVOLVED IN: photosystem II repair; LOCATED IN: thylakoid, chloroplast thylakoid membrane, chloroplast thylakoid lumen, chloroplast photosystem II, chloroplast; EXPRESSED IN: 23 plant structures; EXPRESSED DURING: 13 growth stages; Has 273 Blast hits to 273 proteins in 82 sp…
'1.1.2.2'	'PS.lightreaction.photosystem I.PSI polypeptide subunits'	HORVU5Hr1G005480,1	9.26913	2.16426e-18	'(loc_osp1g00920.1 : 177.0) no description available & (p69415|psac_wheat : 175.0) Photosystem I iron-sulfur center (Photosystem I subunit VII) (9 kDa polypeptide) (PSI-C) (PsaC) - Triticum aestivum (Wheat) & (atcg01060 : 168.0) Encodes the PsaC subunit of photosystem I.; PSAC; FUNCTIONS IN: 4 iron, 4 sulfur cluster binding, electron carrier activity, iron-sulfur cluster binding; INVOLVED IN: pho…
'1.1.30'	'PS.lightreaction.state transition'	HORVU1Hr1G049470,1	10.3498	7.16484e-137	'(loc_os10g38920.1 : 593.0) no description available & (at1g01540 : 432.0) Protein kinase superfamily protein; FUNCTIONS IN: protein serine/threonine kinase activity, protein kinase activity, kinase activity, ATP binding; INVOLVED IN: protein amino acid phosphorylation; LOCATED IN: plasma membrane; EXPRESSED IN: 23 plant structures; EXPRESSED DURING: 13 growth stages; CONTAINS InterPro DOMAIN/s: …
'1.1.40'	'PS.lightreaction.cyclic electron flow-chlororespiration'	HORVU7Hr1G064100,2	8.77149	2.91936e-13	'(loc_os08g45190.1 : 198.0) no description available & (at2g05620 : 150.0) Involved in electron flow in Photosystem I. Essential for photoprotection.; proton gradient regulation 5 (PGR5); FUNCTIONS IN: electron carrier activity; INVOLVED IN: response to water deprivation, response to high light intensity, photosynthetic electron transport in photosystem I; LOCATED IN: chloroplast thylakoid membra…
'1.1.5.3'	'PS.lightreaction.other electron carrier (ox/red).ferredoxin reductase'	HORVU7Hr1G002210,5	9.39874	5.16068e-27	'(p41344|fenr1_orysa : 189.0) Ferredoxin--NADP reductase, leaf isozyme, chloroplast precursor (EC 1.18.1.2) (FNR) - Oryza sativa (Rice) & (loc_os06g01850.1 : 189.0) no description available & (at5g66190 : 179.0) Encodes a leaf-type ferredoxin:NADP(H) oxidoreductase. It is present in both chloroplast stroma and thylakoid membranes but is more abundant in the thylakoid. The affinity of this enzyme …
'1.3.13'	'PS.calvin cycle.rubisco interacting'	HORVU4Hr1G027260,19	13.2291	0	'(q40073|rcaa_horvu : 517.0) Ribulose bisphosphate carboxylase/oxygenase activase A, chloroplast precursor (RuBisCO activase A) (RA A) - Hordeum vulgare (Barley) & (loc_os11g47970.5 : 481.0) no description available & (at2g39730 : 455.0) Rubisco activase, a nuclear-encoded chloroplast protein that consists of two isoforms arising from alternative splicing in most plants. Required for the light ac…
'1.3.8'	'PS.calvin cycle.transketolase'	HORVU2Hr1G012790,1	9.26679	6.1302e-147	'(loc_os04g19740.1 : 1207.0) no description available & (q7sic9|tktc_maize : 1117.0) Transketolase, chloroplast (EC 2.2.1.1) (TK) - Zea mays (Maize) & (at2g45290 : 1086.0) Transketolase; FUNCTIONS IN: catalytic activity, transketolase activity; INVOLVED IN: response to cadmium ion; LOCATED IN: chloroplast stroma, chloroplast; EXPRESSED IN: 25 plant structures; EXPRESSED DURING: 16 growth stages; …
'2.1.2.1'	'major CHO metabolism.synthesis.starch.AGPase'	HORVU1Hr1G091600,12	8.91289	7.41404e-100	'(p30524|glgl1_horvu : 469.0) Glucose-1-phosphate adenylyltransferase large subunit 1, chloroplast precursor (EC 2.7.7.27) (ADP-glucose synthase) (ADP-glucose pyrophosphorylase) (AGPase S) (Alpha-D-glucose-1-phosphate adenyl transferase) (BEPL) - Hordeum vulgare (B & (loc_os05g50380.1 : 405.0) no description available & (at2g21590 : 228.0) Encodes the large subunit of ADP-glucose pyrophosphorylas…
'2.1.2.3'	'major CHO metabolism.synthesis.starch.starch branching'	HORVU2Hr1G072500,34	9.92184	2.0992e-184	'(q08047|glgb_maize : 969.0) 1,4-alpha-glucan branching enzyme IIB, chloroplast precursor (EC 2.4.1.18) (Starch branching enzyme IIB) (Q-enzyme) - Zea mays (Maize) & (loc_os02g32660.1 : 960.0) no description available & (at5g03650 : 919.0) Encodes starch branching enzyme (E.C.2.4.1.18) similar to SBE2 from maize and rice. Expressed throughout the plant and highest in seedlings and cauline leaves.…
'2.2.1.3.1'	'major CHO metabolism.degradation.sucrose.invertases.neutral'	HORVU4Hr1G052570,6	8.83289	4.29754e-66	'(loc_os03g20020.1 : 738.0) no description available & (at1g56560 : 645.0) Plant neutral invertase family protein; FUNCTIONS IN: catalytic activity, beta-fructofuranosidase activity; INVOLVED IN: biological_process unknown; EXPRESSED IN: 24 plant structures; EXPRESSED DURING: 14 growth stages; CONTAINS InterPro DOMAIN/s: Plant neutral invertase (InterPro:IPR006937), Six-hairpin glycosidase-like (…
'2.2.1.3.2'	'major CHO metabolism.degradation.sucrose.invertases.cell wall'	HORVU4Hr1G086300,2	8.99152	4.23068e-97	'(q6eu76|inv1_orysa : 577.0) Beta-fructofuranosidase, insoluble isoenzyme 1 precursor (EC 3.2.1.26) (Sucrose hydrolase 1) (Invertase 1) (Cell wall beta-fructosidase 1) (OsCIN1) - Oryza sativa (Rice) & (loc_os02g33110.2 : 577.0) no description available & (at2g36190 : 412.0) cwINV4 appears to function as a cell wall-localized invertase (that can catalyze the hydrolysis of sucrose into fructose and…
'2.2.1.3.2'	'major CHO metabolism.degradation.sucrose.invertases.cell wall'	HORVU3Hr1G005350,1	9.88417	1.65823e-66	'(q56ud3|inv3_orysa : 899.0) Beta-fructofuranosidase, insoluble isoenzyme 3 precursor (EC 3.2.1.26) (Sucrose hydrolase 3) (Invertase 3) (Cell wall beta-fructosidase 3) (OsCIN3) - Oryza sativa (Rice) & (loc_os04g33720.1 : 899.0) no description available & (at3g52600 : 607.0) cell wall invertase 2 (CWINV2); FUNCTIONS IN: hydrolase activity, hydrolyzing O-glycosyl compounds; INVOLVED IN: carbohydrat…
'2.2.1.3.3'	'major CHO metabolism.degradation.sucrose.invertases.vacuolar'	HORVU6Hr1G004010,9	8.94544	1.4868e-94	'(loc_os02g01590.1 : 872.0) no description available & (p49175|inv1_maize : 684.0) Beta-fructofuranosidase 1 precursor (EC 3.2.1.26) (Sucrose 1) (Invertase 1) - Zea mays (Maize) & (at1g62660 : 587.0) Glycosyl hydrolases family 32 protein; FUNCTIONS IN: hydrolase activity, hydrolyzing O-glycosyl compounds; INVOLVED IN: sucrose catabolic process, using beta-fructofuranosidase, carbohydrate metaboli…
'2.2.1.3.3'	'major CHO metabolism.degradation.sucrose.invertases.vacuolar'	HORVU7Hr1G000270,1	9.29002	3.15284e-131	'(loc_os02g01590.1 : 727.0) no description available & (p49175|inv1_maize : 617.0) Beta-fructofuranosidase 1 precursor (EC 3.2.1.26) (Sucrose 1) (Invertase 1) - Zea mays (Maize) & (at1g62660 : 553.0) Glycosyl hydrolases family 32 protein; FUNCTIONS IN: hydrolase activity, hydrolyzing O-glycosyl compounds; INVOLVED IN: sucrose catabolic process, using beta-fructofuranosidase, carbohydrate metaboli…
'2.2.2.1'	'major CHO metabolism.degradation.starch.starch cleavage'	HORVU1Hr1G057330,20	9.56415	3.7821e-154	'(loc_os07g23880.1 : 648.0) no description available & (at3g23640 : 464.0) heteroglycan glucosidase 1 (HGL1); FUNCTIONS IN: hydrolase activity, hydrolyzing O-glycosyl compounds; INVOLVED IN: carbohydrate metabolic process; LOCATED IN: chloroplast; EXPRESSED IN: 22 plant structures; EXPRESSED DURING: 13 growth stages; CONTAINS InterPro DOMAIN/s: Glycoside hydrolase, family 31 (InterPro:IPR000322),…
'2.2.2.1.2'	'major CHO metabolism.degradation.starch.starch cleavage.beta amylase'	HORVU4Hr1G089510,3	12.7205	0	'(p16098|amyb_horvu : 858.0) Beta-amylase (EC 3.2.1.2) (1,4-alpha-D-glucan maltohydrolase) - Hordeum vulgare (Barley) & (loc_os07g35940.1 : 726.0) no description available & (at4g15210 : 575.0) cytosolic beta-amylase expressed in rosette leaves and inducible by sugar. RAM1 mutants have reduced beta amylase in leaves and stems.; ARABIDOPSIS THALIANA BETA-AMYLASE (ATBETA-AMY); FUNCTIONS IN: beta-am…
'2.2.2.6'	'major CHO metabolism.degradation.starch.transporter'	HORVU3Hr1G007190,8	8.96	3.3541e-66	'(loc_os01g04190.2 : 793.0) no description available & (at5g16150 : 675.0) Encodes a putative plastidic glucose transporter.; plastidic GLC translocator (PGLCT); FUNCTIONS IN: carbohydrate transmembrane transporter activity, sugar:hydrogen symporter activity; INVOLVED IN: response to trehalose stimulus; LOCATED IN: membrane; EXPRESSED IN: 24 plant structures; EXPRESSED DURING: 14 growth stages; C…
'3.5'	'minor CHO metabolism.others'	HORVU1Hr1G070310,12	12.1212	0	'(p23901|aldr_horvu : 422.0) Aldose reductase (EC 1.1.1.21) (AR) (Aldehyde reductase) - Hordeum vulgare (Barley) & (loc_os05g39690.1 : 392.0) no description available & (at5g01670 : 313.0) NAD(P)-linked oxidoreductase superfamily protein; FUNCTIONS IN: oxidoreductase activity; INVOLVED IN: oxidation reduction; EXPRESSED IN: 18 plant structures; EXPRESSED DURING: 11 growth stages; CONTAINS InterPr…
'3.5'	'minor CHO metabolism.others'	HORVU2Hr1G080140,1	10.6795	3.65946e-192	'(loc_os04g38540.2 : 513.0) no description available & (at5g15140 : 291.0) Galactose mutarotase-like superfamily protein; FUNCTIONS IN: aldose 1-epimerase activity; INVOLVED IN: galactose metabolic process, hexose metabolic process, carbohydrate metabolic process; LOCATED IN: endomembrane system; EXPRESSED IN: 11 plant structures; EXPRESSED DURING: 7 growth stages; CONTAINS InterPro DOMAIN/s: Gly…
'3.5'	'minor CHO metabolism.others'	HORVU6Hr1G013800,5	10.5765	4.9445e-126	'(loc_os02g03100.2 : 482.0) no description available & (at2g21250 : 457.0) NAD(P)-linked oxidoreductase superfamily protein; FUNCTIONS IN: oxidoreductase activity; INVOLVED IN: response to cadmium ion; EXPRESSED IN: cultured cell, leaf; EXPRESSED DURING: seedling growth; CONTAINS InterPro DOMAIN/s: Aldo/keto reductase (InterPro:IPR001395), Aldo/keto reductase subgroup (InterPro:IPR020471), Aldo/k…
'3.5'	'minor CHO metabolism.others'	HORVU1Hr1G090020,12	8.75489	2.7563e-37	'(loc_os05g49430.1 : 127.0) no description available & (at3g61610 : 108.0) Galactose mutarotase-like superfamily protein; FUNCTIONS IN: carbohydrate binding, isomerase activity, aldose 1-epimerase activity, catalytic activity; INVOLVED IN: galactose metabolic process, N-terminal protein myristoylation, carbohydrate metabolic process; LOCATED IN: cellular_component unknown; EXPRESSED IN: 17 plant …
'3.8.2'	'minor CHO metabolism.galactose.alpha-galactosidases'	HORVU6Hr1G075240,5	9.29692	1.90713e-110	'(loc_os01g33420.1 : 456.0) no description available & (at3g26380 : 385.0) Melibiase family protein; FUNCTIONS IN: alpha-galactosidase activity, hydrolase activity, hydrolyzing O-glycosyl compounds, catalytic activity; INVOLVED IN: N-terminal protein myristoylation, carbohydrate metabolic process, metabolic process, lactose catabolic process; LOCATED IN: cell wall; EXPRESSED IN: 23 plant structur…
'4.1.12'	'glycolysis.cytosolic branch.phosphoglycerate mutase'	HORVU4Hr1G051010,2	9.09803	5.31232e-108	'(loc_os03g21260.1 : 271.0) no description available & (q42908|pmgi_mescr : 261.0) 2,3-bisphosphoglycerate-independent phosphoglycerate mutase (EC 5.4.2.1) (Phosphoglyceromutase) (BPG-independent PGAM) (PGAM-I) - Mesembryanthemum crystallinum (Common ice plant) & (at1g09780 : 256.0) Phosphoglycerate mutase, 2,3-bisphosphoglycerate-independent; FUNCTIONS IN: manganese ion binding, phosphoglycerate…
'4.1.13'	'glycolysis.cytosolic branch.enolase'	HORVU7Hr1G017640,12	10.5353	1.15411e-236	'(loc_os06g04510.1 : 351.0) no description available & (p42895|eno2_maize : 335.0) Enolase 2 (EC 4.2.1.11) (2-phosphoglycerate dehydratase 2) (2-phospho-D-glycerate hydro-lyase 2) - Zea mays (Maize) & (at2g36530 : 319.0) Involved in light-dependent cold tolerance and encodes an enolase. Protein is tyrosine-phosphorylated and its phosphorylation state is modulated in response to ABA in Arabidopsis…
'4.1.14'	'glycolysis.cytosolic branch.pyruvate kinase (PK)'	HORVU5Hr1G041120,7	8.79442	1.78949e-65	'(loc_os11g05110.2 : 979.0) no description available & (at3g52990 : 910.0) Pyruvate kinase family protein; FUNCTIONS IN: pyruvate kinase activity, magnesium ion binding, potassium ion binding, catalytic activity; INVOLVED IN: glycolysis; LOCATED IN: membrane; EXPRESSED IN: guard cell, cultured cell, leaf; CONTAINS InterPro DOMAIN/s: Pyruvate/Phosphoenolpyruvate kinase, catalytic core (InterPro:IP…
'4.1.15'	'glycolysis.cytosolic branch.phospho-enol-pyruvate carboxylase (PEPC)'	HORVU6Hr1G048410,5	9.69523	3.94016e-245	'(loc_os02g14770.3 : 593.0) no description available & (p29195|capp1_sorbi : 580.0) Phosphoenolpyruvate carboxylase 1 (EC 4.1.1.31) (PEPCase 1) (PEPC 1) (CP21) - Sorghum bicolor (Sorghum) (Sorghum vulgare) & (at3g14940 : 511.0) Encodes a cytosolic phosphoenolpyruvate carboxylase (PEPC) that has activity when expressed in E.coli. Its mRNA is most abundantly expressed in roots and siliques. PPC3 be…
'4.1.5'	'glycolysis.cytosolic branch.pyrophosphate-fructose-6-P phosphotransferase'	HORVU7Hr1G040550,6	10.1984	2.64194e-244	'(loc_os06g13810.1 : 828.0) no description available & (at1g12000 : 754.0) Phosphofructokinase family protein; FUNCTIONS IN: diphosphate-fructose-6-phosphate 1-phosphotransferase activity; INVOLVED IN: response to cadmium ion, glycolysis, photosynthesis; LOCATED IN: pyrophosphate-dependent phosphofructokinase complex, beta-subunit complex, cell wall, membrane; EXPRESSED IN: 24 plant structures; E…
'4.1.7'	'glycolysis.cytosolic branch.triosephosphate isomerase (TPI)'	HORVU3Hr1G013350,4	9.81218	1.3742e-59	'(p34937|tpis_horvu : 201.0) Triosephosphate isomerase, cytosolic (EC 5.3.1.1) (TIM) (Triose-phosphate isomerase) - Hordeum vulgare (Barley) & (loc_os01g05490.1 : 174.0) no description available & (at3g55440 : 159.0) Encodes triosephosphate isomerase.; triosephosphate isomerase (TPI); FUNCTIONS IN: triose-phosphate isomerase activity, copper ion binding; INVOLVED IN: in 7 processes; LOCATED IN: i…
'4.2.14'	'glycolysis.plastid branch.pyruvate kinase (PK)'	HORVU2Hr1G050140,2	8.77479	5.98246e-33	'(loc_os07g08340.2 : 323.0) no description available & (q43117|kpya_ricco : 298.0) Pyruvate kinase isozyme A, chloroplast precursor (EC 2.7.1.40) - Ricinus communis (Castor bean) & (at3g22960 : 297.0) encodes a chloroplast pyruvate kinase alpha subunit. Important for seed oil biosynthesis. Ubiquitously expressed, with significantly increased expression in maturing seeds.; PKP-ALPHA; FUNCTIONS IN:…
'6.3'	'gluconeogenesis / glyoxylate cycle.Malate DH'	HORVU5Hr1G002010,6	10.7781	2.56652e-163	'(q42972|mdhg_orysa : 544.0) Malate dehydrogenase, glyoxysomal precursor (EC 1.1.1.37) - Oryza sativa (Rice) & (loc_os12g43630.2 : 544.0) no description available & (at5g09660 : 474.0) encodes a microbody NAD-dependent malate dehydrogenase encodes an peroxisomal NAD-malate dehydrogenase that is involved in fatty acid beta-oxidation through providing NAD to the process of converting fatty acyl CoA…
'6.9'	'gluconeogenesis / glyoxylate cycle.isocitrate lyase'	HORVU2Hr1G045340,1	11.2456	0	'(loc_os07g34520.1 : 983.0) no description available & (p17069|acea_goshi : 887.0) Isocitrate lyase (EC 4.1.3.1) (Isocitrase) (Isocitratase) (ICL) - Gossypium hirsutum (Upland cotton) & (at3g21720 : 853.0) Encodes a glyoxylate cycle enzyme isocitrate lyase (ICL).; isocitrate lyase (ICL); FUNCTIONS IN: isocitrate lyase activity, catalytic activity; INVOLVED IN: carboxylic acid metabolic process, m…
'8.1.1.1'	'TCA / org transformation.TCA.pyruvate DH.E1'	HORVU7Hr1G040460,14	9.10852	9.61672e-67	'(loc_os06g13720.1 : 498.0) no description available & (p52903|odpa_soltu : 465.0) Pyruvate dehydrogenase E1 component subunit alpha, mitochondrial precursor (EC 1.2.4.1) (PDHE1-A) - Solanum tuberosum (Potato) & (at1g24180 : 455.0) Arabidopsis thaliana pyruvate dehydrogenase E1a-like subunit. 81% identical to a previously characterized Arabidopsis mitochondrial PDH E1a-subunit, At1g59900; IAA-CON…
'8.1.4'	'TCA / org transformation.TCA.IDH'	HORVU3Hr1G059060,10	9.55842	3.01946e-83	'(loc_os01g46610.1 : 761.0) no description available & (at1g65930 : 715.0) Encodes a NADP+-isocitrate dehydrogenase that is believed to function in the cytosol. It appears to contribute to NADPH production under oxidative stress, and thereby to participate in redox signalling linked to defense responses.; cytosolic NADP+-dependent isocitrate dehydrogenase (cICDH); FUNCTIONS IN: isocitrate dehydro…
'8.1.7'	'TCA / org transformation.TCA.succinate dehydrogenase'	HORVU5Hr1G058190,1	11.656	0	'(loc_os09g20440.1 : 332.0) no description available & (at5g65165 : 312.0) One of three isoforms of the iron-sulfur component of the succinate dehydrogenase complex, a component of the mitochondrial respiratory chain complex II. The product of the nuclear encoded gene is imported into the mitochondrion. Transcripts appear during seed maturation, persist through dessication, are abundant in dry se…
'8.2.10'	'TCA / org transformation.other organic acid transformatons.malic'	HORVU3Hr1G070850,4	10.5167	3.26096e-201	'(loc_os01g54030.1 : 428.0) no description available & (p51615|maox_vitvi : 379.0) NADP-dependent malic enzyme (EC 1.1.1.40) (NADP-ME) - Vitis vinifera (Grape) & (at2g19900 : 365.0) The malic enzyme (EC 1.1.1.40) encoded by AtNADP-ME1 is expressed in response to developmental and cell-specific signals. The enzyme is active in vitro and appears to function as a homohexamer or homooctamer. It is be…
'8.2.9'	'TCA / org transformation.other organic acid transformatons.cyt MDH'	HORVU7Hr1G060260,5	9.01681	8.99354e-74	'(loc_os08g44810.1 : 726.0) no description available & (p17606|mdhp1_sorbi : 711.0) Malate dehydrogenase [NADP] 1, chloroplast precursor (EC 1.1.1.82) (NADP-MDH-1) - Sorghum bicolor (Sorghum) (Sorghum vulgare) & (at5g58330 : 639.0) lactate/malate dehydrogenase family protein; FUNCTIONS IN: in 6 functions; INVOLVED IN: in 6 processes; LOCATED IN: thylakoid, mitochondrion, apoplast, chloroplast; EX…
'8.3'	'TCA / org transformation.carbonic anhydrases'	HORVU3Hr1G057090,5	9.02237	3.97138e-48	'(p40880|cahc_horvu : 338.0) Carbonic anhydrase, chloroplast precursor (EC 4.2.1.1) (Carbonate dehydratase) - Hordeum vulgare (Barley) & (loc_os01g45274.4 : 298.0) no description available & (at5g14740 : 217.0) Encodes a beta carbonic anhydrase likely to be localized in the cytoplasm. Expression of its mRNA is seen in etiolated seedlings and points to a possible nonphotosynthetic role for this is…
'8.3'	'TCA / org transformation.carbonic anhydrases'	HORVU7Hr1G117870,5	10.0821	2.13188e-123	'(loc_os08g36630.1 : 219.0) no description available & (at1g08080 : 168.0) alpha carbonic anhydrase 7 (ACA7); FUNCTIONS IN: carbonate dehydratase activity, zinc ion binding; INVOLVED IN: one-carbon metabolic process; LOCATED IN: endomembrane system; CONTAINS InterPro DOMAIN/s: Carbonic anhydrase, alpha-class, catalytic domain (InterPro:IPR001148), Carbonic anhydrase, CAH1-like (InterPro:IPR018340…
'9.1.2'	'mitochondrial electron transport / ATP synthesis.NADH-DH.localisation not clear'	HORVU1Hr1G077910,3	10.5498	6.34234e-142	'(loc_os05g43360.1 : 456.0) no description available & (at4g02580 : 399.0) NADH-ubiquinone oxidoreductase 24 kDa subunit, putative; FUNCTIONS IN: NADH dehydrogenase (ubiquinone) activity, zinc ion binding; INVOLVED IN: response to oxidative stress, mitochondrial electron transport, NADH to ubiquinone; LOCATED IN: mitochondrion, mitochondrial respiratory chain complex I, respiratory chain complex …
'9.9'	'mitochondrial electron transport / ATP synthesis.F1-ATPase'	HORVU0Hr1G019950,2	8.79766	2.63636e-63	'(p12862|atpam_wheat : 981.0) ATP synthase subunit alpha, mitochondrial (EC 3.6.3.14) - Triticum aestivum (Wheat) & (loc_osm1g00580.1 : 962.0) no description available & (atmg01190 : 901.0) ATPase subunit 1; ATP synthase subunit 1 (ATP1); FUNCTIONS IN: copper ion binding, cobalt ion binding, zinc ion binding; INVOLVED IN: response to oxidative stress; LOCATED IN: mitochondrion, cell wall; EXPRESS…
'10.1.1.1'	'cell wall.precursor synthesis.NDP sugar pyrophosphorylase.GDP mannose'	HORVU4Hr1G060380,3	8.88264	1.03208e-66	'(loc_os03g16150.1 : 600.0) no description available & (at2g39770 : 560.0) Encodes a GDP-mannose pyrophosphorylase/ mannose-1-pyrophosphatase. This enzyme provides GDP-mannose, which is used for cell wall carbohydrate biosynthesis and protein glycosylation as well as for ascorbate (vitamin C) biosynthesis. Mutations in this gene confer hypersensitivity to NH4+.; CYTOKINESIS DEFECTIVE 1 (CYT1); CO…
'10.1.6'	'cell wall.precursor synthesis.GAE'	HORVU5Hr1G075660,1	9.24951	0	'(loc_os09g32670.1 : 680.0) no description available & (at3g23820 : 504.0) UDP-D-glucuronate 4-epimerase; UDP-D-glucuronate 4-epimerase 6 (GAE6); FUNCTIONS IN: UDP-glucuronate 4-epimerase activity, catalytic activity; INVOLVED IN: cellular metabolic process, carbohydrate metabolic process, nucleotide-sugar metabolic process, metabolic process; LOCATED IN: cellular_component unknown; EXPRESSED IN:…
'10.6.2'	'cell wall.degradation.mannan-xylose-arabinose-fucose'	HORVU2Hr1G101150,1	12.6214	0	'(loc_os04g51520.1 : 197.0) no description available & (at5g57540 : 184.0) Encodes a xyloglucan endotransglucosylase/hydrolase with only only the endotransglucosylase (XET; EC 2.4.1.207) activity towards xyloglucan and non-detectable endohydrolytic (XEH; EC 3.2.1.151) activity.; xyloglucan endotransglucosylase/hydrolase 13 (XTH13); FUNCTIONS IN: hydrolase activity, acting on glycosyl bonds, xylog…
'10.6.2'	'cell wall.degradation.mannan-xylose-arabinose-fucose'	HORVU4Hr1G012330,7	10.8122	0	'(loc_os11g19210.1 : 1242.0) no description available & (at1g78060 : 824.0) Glycosyl hydrolase family protein; FUNCTIONS IN: hydrolase activity, hydrolyzing O-glycosyl compounds; INVOLVED IN: carbohydrate metabolic process; LOCATED IN: apoplast, cell wall, chloroplast, plant-type cell wall; EXPRESSED IN: 22 plant structures; EXPRESSED DURING: 13 growth stages; CONTAINS InterPro DOMAIN/s: Glycosid…
'10.6.2'	'cell wall.degradation.mannan-xylose-arabinose-fucose'	HORVU4Hr1G070260,12	11.2149	0	'(loc_os03g10478.1 : 889.0) no description available & (at4g33840 : 553.0) Glycosyl hydrolase family 10 protein; FUNCTIONS IN: cation binding, hydrolase activity, hydrolyzing O-glycosyl compounds, catalytic activity; INVOLVED IN: carbohydrate metabolic process; LOCATED IN: endomembrane system; CONTAINS InterPro DOMAIN/s: Glycoside hydrolase, family 10 (InterPro:IPR001000), Carbohydrate-binding, C…
'10.7'	'cell wall.modification'	HORVU0Hr1G016380,3	8.96867	4.67392e-49	'(q7xt40|exb15_orysa : 374.0) Expansin-B15 precursor (OsEXPB15) (Beta-expansin-15) (OsaEXPb1.16) - Oryza sativa (Rice) & (loc_os04g46630.1 : 374.0) no description available & (at2g45110 : 264.0) member of BETA-EXPANSINS. Naming convention from the Expansin Working Group (Kende et al, 2004. Plant Mol Bio); expansin B4 (EXPB4); INVOLVED IN: plant-type cell wall modification involved in multidimensi…
'10.7'	'cell wall.modification'	HORVU6Hr1G075970,5	11.0566	1.16463e-213	'(q6zgu9|expa5_orysa : 203.0) Expansin-A5 precursor (OsEXPA5) (Alpha-expansin-5) (OsEXP5) (OsaEXPa1.20) - Oryza sativa (Rice) & (loc_os02g51040.1 : 203.0) no description available & (at1g69530 : 178.0) Member of Alpha-Expansin Gene Family. Naming convention from the Expansin Working Group (Kende et al, Plant Mol Bio). Involved in the formation of nematode-induced syncytia in roots of Arabidopsis …
'10.7'	'cell wall.modification'	HORVU4Hr1G067850,2	8.85487	1.52257e-39	'(q4pr44|exp22_orysa : 245.0) Expansin-A22 precursor (OsEXPA22) (Alpha-expansin-22) (OsEXP22) (OsaEXPa1.9) - Oryza sativa (Rice) & (loc_os02g16850.1 : 245.0) no description available & (at1g20190 : 209.0) member of Alpha-Expansin Gene Family. Naming convention from the Expansin Working Group (Kende et al, 2004. Plant Mol Bio); expansin 11 (EXPA11); INVOLVED IN: plant-type cell wall modification i…
'10.8.1'	'cell wall.pectin*esterases.PME'	HORVU6Hr1G082990,2	10.9901	7.46164e-62	'(loc_os02g54190.1 : 332.0) no description available & (at2g47550 : 248.0) Plant invertase/pectin methylesterase inhibitor superfamily; FUNCTIONS IN: enzyme inhibitor activity, pectinesterase activity; INVOLVED IN: cell wall modification; LOCATED IN: endomembrane system, cell wall, plant-type cell wall; EXPRESSED IN: 20 plant structures; EXPRESSED DURING: 9 growth stages; CONTAINS InterPro DOMAIN…
'11.1.8'	'lipid metabolism.FA synthesis and FA elongation.acyl coa ligase'	HORVU2Hr1G120150,5	9.41151	4.34502e-129	'(loc_os04g57850.1 : 945.0) no description available & (at5g16370 : 684.0) acyl activating enzyme 5 (AAE5); FUNCTIONS IN: catalytic activity; INVOLVED IN: metabolic process; LOCATED IN: peroxisome; EXPRESSED IN: leaf; CONTAINS InterPro DOMAIN/s: AMP-binding, conserved site (InterPro:IPR020845), AMP-dependent synthetase/ligase (InterPro:IPR000873); BEST Arabidopsis thaliana protein match is: AMP-d…
'11.3'	'lipid metabolism.Phospholipid synthesis'	HORVU4Hr1G074470,1	8.94837	3.93168e-118	'(loc_os10g27330.1 : 288.0) no description available & (at3g11430 : 242.0) Encodes a protein with glycerol-3-phosphate acyltransferase activity, involved in the biosynthesis of suberin polyester.; glycerol-3-phosphate acyltransferase 5 (GPAT5); CONTAINS InterPro DOMAIN/s: Phospholipid/glycerol acyltransferase (InterPro:IPR002123); BEST Arabidopsis thaliana protein match is: glycerol-3-phosphate a…
'11.3.5'	'lipid metabolism.Phospholipid synthesis.diacylglycerol kinase'	HORVU6Hr1G083620,19	8.87958	7.61896e-52	'(loc_os02g54650.1 : 609.0) no description available & (at4g30340 : 491.0) encodes a diacylglycerol kinase. Applying a specific diacylglycerol kinase inhibitor to the growth media resulted in reduced root elongation and plant growth. Gene is expressed throughout the plant but is strongest in flowers and young seedlings.; diacylglycerol kinase 7 (DGK7); FUNCTIONS IN: diacylglycerol kinase activity…
'11.6'	'lipid metabolism.lipid transfer proteins etc'	HORVU5Hr1G046550,1	14.9708	0	'(p07597|nltp1_horvu : 209.0) Nonspecific lipid-transfer protein 1 precursor (LTP 1) (Probable amylase/protease inhibitor) - Hordeum vulgare (Barley) & (loc_os11g02389.1 : 137.0) no description available & (at3g08770 : 86.3) Predicted to encode a PR (pathogenesis-related) protein. Belongs to the lipid transfer protein (PR-14) family with the following members: At2g38540/LTP1, At2g38530/LTP2, At5g…
'11.8.1'	'lipid metabolism.'exotics' (steroids, squalene etc).sphingolipids'	HORVU3Hr1G015150,14	9.16491	5.26136e-76	'(q52rg7|sgpl_orysa : 535.0) Sphingosine-1-phosphate lyase precursor (EC 4.1.2.27) (SP-lyase) (SPL) (Sphingosine-1-phosphate aldolase) - Oryza sativa (Rice) & (loc_os01g01080.1 : 535.0) no description available & (at1g27980 : 459.0) dihydrosphingosine phosphate lyase (DPL1); FUNCTIONS IN: pyridoxal phosphate binding, carboxy-lyase activity, catalytic activity; INVOLVED IN: sphingolipid catabolic …
'11.8.1.1'	'lipid metabolism.'exotics' (steroids, squalene etc).sphingolipids.ceramidase'	HORVU3Hr1G055870,6	10.2033	7.86908e-235	'(loc_os01g43520.2 : 1356.0) no description available & (at2g38010 : 1056.0) Neutral/alkaline non-lysosomal ceramidase; FUNCTIONS IN: ceramidase activity; LOCATED IN: endomembrane system; EXPRESSED IN: 22 plant structures; EXPRESSED DURING: 13 growth stages; CONTAINS InterPro DOMAIN/s: Neutral/alkaline nonlysosomal ceramidase (InterPro:IPR006823); BEST Arabidopsis thaliana protein match is: Neutr…
'11.8.1.3'	'lipid metabolism.''exotics'' (steroids, squalene etc).sphingolipids.ceramide glucosyltransferase'	HORVU5Hr1G035030,1	9.02791	8.61308e-26	'(at2g19880 : 89.4) Nucleotide-diphospho-sugar transferases superfamily protein; FUNCTIONS IN: ceramide glucosyltransferase activity; INVOLVED IN: biological_process unknown; LOCATED IN: endomembrane system; EXPRESSED IN: 24 plant structures; EXPRESSED DURING: 15 growth stages; CONTAINS InterPro DOMAIN/s: Glycosyl transferase, family 2 (InterPro:IPR001173). & (loc_os01g67870.1 : 86.3) no descript…
'11.8.10'	'lipid metabolism.'exotics' (steroids, squalene etc).phosphatidylcholinesterol O-acyltransferase'	HORVU2Hr1G098800,8	9.224	5.05778e-67	'(loc_os04g52500.1 : 230.0) no description available & (at4g19860 : 133.0) alpha/beta-Hydrolases superfamily protein; FUNCTIONS IN: phosphatidylcholine-sterol O-acyltransferase activity; INVOLVED IN: lipid metabolic process; LOCATED IN: cellular_component unknown; EXPRESSED IN: 23 plant structures; EXPRESSED DURING: 15 growth stages; CONTAINS InterPro DOMAIN/s: Lecithin:cholesterol acyltransferas…
'11.8.2'	'lipid metabolism.'exotics' (steroids, squalene etc).methylsterol monooxygenase'	HORVU4Hr1G018150,1	10.0238	1.76272e-170	'(loc_os03g01820.1 : 418.0) no description available & (at4g22756 : 343.0) Encodes a member of the SMO1 family of sterol 4alpha-methyl oxidases. More specifically functions as a 4,4-dimethyl-9beta,19-cyclopropylsterol-4alpha- methyl oxidase.; sterol C4-methyl oxidase 1-2 (SMO1-2); FUNCTIONS IN: C-4 methylsterol oxidase activity, 4,4-dimethyl-9beta,19-cyclopropylsterol-4alpha-methyl oxidase activi…
'11.9.2'	'lipid metabolism.lipid degradation.lipases'	HORVU2Hr1G025800,2	9.35975	7.946e-78	'(loc_os07g44780.1 : 221.0) no description available & (at1g28570 : 153.0) SGNH hydrolase-type esterase superfamily protein; FUNCTIONS IN: lipase activity, hydrolase activity, acting on ester bonds, carboxylesterase activity; INVOLVED IN: lipid metabolic process; LOCATED IN: endomembrane system; EXPRESSED IN: 22 plant structures; EXPRESSED DURING: 13 growth stages; CONTAINS InterPro DOMAIN/s: Lip…
'11.9.2'	'lipid metabolism.lipid degradation.lipases'	HORVU2Hr1G025810,1	9.70563	1.21031e-126	'(loc_os07g44780.1 : 488.0) no description available & (at1g31550 : 286.0) GDSL-like Lipase/Acylhydrolase superfamily protein; FUNCTIONS IN: lipase activity, hydrolase activity, acting on ester bonds, carboxylesterase activity; INVOLVED IN: lipid metabolic process; LOCATED IN: vacuole; EXPRESSED IN: 20 plant structures; EXPRESSED DURING: 13 growth stages; CONTAINS InterPro DOMAIN/s: Lipase, GDSL …
'11.9.3.3'	'lipid metabolism.lipid degradation.lysophospholipases.glycerophosphodiester phosphodiesterase'	HORVU2Hr1G070700,1	9.5157	3.63936e-95	'(loc_os04g32320.1 : 114.0) no description available & (at5g41080 : 100.0) PLC-like phosphodiesterases superfamily protein; FUNCTIONS IN: phosphoric diester hydrolase activity, glycerophosphodiester phosphodiesterase activity; INVOLVED IN: glycerol metabolic process, lipid metabolic process; EXPRESSED IN: 23 plant structures; EXPRESSED DURING: 14 growth stages; CONTAINS InterPro DOMAIN/s: PLC-lik…
'11.9.4.2'	'lipid metabolism.lipid degradation.beta-oxidation.acyl CoA DH'	HORVU1Hr1G024240,10	10.0661	1.35778e-156	'(loc_os05g07090.1 : 788.0) no description available & (at3g51840 : 686.0) Encodes a short-chain acyl-CoA oxidase, which catalyzes the first step of peroxisomal fatty acid beta-oxidation during early, post-germinative growth in oilseed species. Null mutants virtually lack short-chain acyl-CoA and are resistant to 2,4-dichlorophenoxybutyric acid, which is converted to the herbicide and auxin analo…
'13.1.1.2.1'	'amino acid metabolism.synthesis.central amino acid metabolism.aspartate.aspartate aminotransferase'	HORVU6Hr1G003470,4	10.4083	3.39986e-174	'(loc_os02g14110.1 : 794.0) no description available & (at2g30970 : 701.0) ASPARTATE AMINOTRANSFERASE 1; aspartate aminotransferase 1 (ASP1); FUNCTIONS IN: L-aspartate:2-oxoglutarate aminotransferase activity, copper ion binding; LOCATED IN: mitochondrion; EXPRESSED IN: 23 plant structures; EXPRESSED DURING: 13 growth stages; CONTAINS InterPro DOMAIN/s: Aminotransferase, class I/classII (InterPro…
'13.1.1.3.1'	'amino acid metabolism.synthesis.central amino acid metabolism.alanine.alanine aminotransferase'	HORVU1Hr1G018540,3	9.19722	4.18104e-70	'(p52894|ala2_horvu : 520.0) Alanine aminotransferase 2 (EC 2.6.1.2) (GPT) (Glutamic--pyruvic transaminase 2) (Glutamic--alanine transaminase 2) (ALAAT-2) - Hordeum vulgare (Barley) & (loc_os10g25130.1 : 472.0) no description available & (at1g72330 : 408.0) Encodes for alanine aminotransferase ALAAT2.; alanine aminotransferase 2 (ALAAT2); FUNCTIONS IN: copper ion binding, L-alanine:2-oxoglutarate…
'13.1.1.3.1'	'amino acid metabolism.synthesis.central amino acid metabolism.alanine.alanine aminotransferase'	HORVU5Hr1G062990,1	12.0244	0	'(loc_os09g26380.1 : 755.0) no description available & (at1g17290 : 600.0) Encodes for alanine aminotransferase (ALAAT1), involved in alanine catabolism during plants recovery from hypoxia; alanine aminotransferas (AlaAT1); FUNCTIONS IN: L-alanine:2-oxoglutarate aminotransferase activity, ATP binding; INVOLVED IN: response to cadmium ion, response to hypoxia, L-alanine catabolic process, by trans…
'13.1.3.1.1'	'amino acid metabolism.synthesis.aspartate family.asparagine.asparagine synthetase'	HORVU5Hr1G048100,4	9.92333	7.23014e-275	'(p49092|asns1_lotja : 463.0) Asparagine synthetase [glutamine-hydrolyzing] 1 (EC 6.3.5.4) (Glutamine-dependent asparagine synthetase 1) - Lotus japonicus & (at3g47340 : 457.0) encodes a glutamine-dependent asparagine synthetase, the predicted ASN1 peptide contains a purF-type glutamine-binding domain, and is expressed predominantly in shoot tissues, where light has a negative effect on its mRNA …
'13.1.3.1.1'	'amino acid metabolism.synthesis.aspartate family.asparagine.asparagine synthetase'	HORVU3Hr1G013910,2	9.31288	1.00894e-103	'(p31752|asns_aspof : 967.0) Asparagine synthetase [glutamine-hydrolyzing] (EC 6.3.5.4) (AS) - Asparagus officinalis (Garden asparagus) & (at3g47340 : 953.0) encodes a glutamine-dependent asparagine synthetase, the predicted ASN1 peptide contains a purF-type glutamine-binding domain, and is expressed predominantly in shoot tissues, where light has a negative effect on its mRNA accumulation. Expre…
'13.1.4.1.1'	'amino acid metabolism.synthesis.branched chain group.common.acetolactate synthase'	HORVU6Hr1G055840,11	10.6609	4.48016e-202	'(loc_os02g39570.4 : 700.0) no description available & (at2g31810 : 595.0) ACT domain-containing small subunit of acetolactate synthase protein; FUNCTIONS IN: acetolactate synthase activity, amino acid binding; INVOLVED IN: branched chain family amino acid biosynthetic process; LOCATED IN: chloroplast; EXPRESSED IN: 24 plant structures; EXPRESSED DURING: 13 growth stages; CONTAINS InterPro DOMAIN…
'13.1.4.1.4'	'amino acid metabolism.synthesis.branched chain group.common.branched-chain amino acid aminotransferase'	HORVU0Hr1G008950,4	10.2264	1.62078e-187	'(loc_os03g12890.5 : 232.0) no description available & (at3g49680 : 192.0) Encodes a chloroplast branched-chain amino acid aminotransferase. Complements the yeast leu/iso-leu/val auxotrophy mutant.; branched-chain aminotransferase 3 (BCAT3); FUNCTIONS IN: branched-chain-amino-acid transaminase activity, catalytic activity; INVOLVED IN: branched chain family amino acid metabolic process, metabolic…
'13.1.6.1.5'	'amino acid metabolism.synthesis.aromatic aa.chorismate.shikimate kinase'	HORVU6Hr1G075420,2	9.45943	7.97868e-55	'(loc_os02g51410.1 : 459.0) no description available & (at2g21940 : 254.0) shikimate kinase 1 (SK1); FUNCTIONS IN: shikimate kinase activity, ATP binding; EXPRESSED IN: 19 plant structures; EXPRESSED DURING: 10 growth stages; CONTAINS InterPro DOMAIN/s: Shikimate kinase (InterPro:IPR000623); BEST Arabidopsis thaliana protein match is: shikimate kinase 2 (TAIR:AT4G39540.2); Has 7831 Blast hits to …
'13.1.6.5.5'	'amino acid metabolism.synthesis.aromatic aa.tryptophan.tryptophan synthase'	HORVU7Hr1G073460,5	9.96723	1.6261e-118	'(loc_os08g04180.1 : 593.0) no description available & (p43284|trpb2_maize : 583.0) Tryptophan synthase beta chain 2, chloroplast precursor (EC 4.2.1.20) (Orange pericarp 2) (Fragment) - Zea mays (Maize) & (at4g27070 : 537.0) Tryptophan synthase beta. Expressed at low levels in all tissues.; tryptophan synthase beta-subunit 2 (TSB2); CONTAINS InterPro DOMAIN/s: Tryptophan synthase, beta chain (In…
'13.2.2.2'	'amino acid metabolism.degradation.glutamate family.proline'	HORVU1Hr1G080320,4	9.64746	2.46618e-102	'(at5g62530 : 868.0) Encodes mitochondrial Delta-pyrroline-5- carboxylate dehydrogenase. Involved in the catabolism of proline to glutamate. Involved in protection from proline toxicity. Induced at pathogen infection sites. P5CDH and SRO5 (an overlapping gene in the sense orientation) generate 24-nt and 21-nt siRNAs, which together are components of a regulatory loop controlling reactive oxygen s…
'13.2.3.5'	'amino acid metabolism.degradation.aspartate family.lysine'	HORVU6Hr1G083050,9	9.10591	2.66718e-222	'(loc_os02g54254.1 : 917.0) no description available & (at4g33150 : 604.0) lysine-ketoglutarate reductase/saccharopine dehydrogenase bifunctional enzyme; CONTAINS InterPro DOMAIN/s: Saccharopine dehydrogenase / Homospermidine synthase (InterPro:IPR005097); Has 1125 Blast hits to 1121 proteins in 331 species: Archae - 40; Bacteria - 296; Metazoa - 110; Fungi - 190; Plants - 55; Viruses - 0; Other …
'13.2.3.5.1'	'mino acid metabolism.degradation.aspartate family.lysine.lysine decarboxylase'	HORVU5Hr1G124750,2	6.76818	3.78048e-07	'(loc_os03g64070.1 : 223.0) no description available & (at2g28305 : 199.0) LONELY GUY 1 (LOG1); CONTAINS InterPro DOMAIN/s: Conserved hypothetical protein CHP00730 (InterPro:IPR005269); BEST Arabidopsis thaliana protein match is: lysine decarboxylase family protein (TAIR:AT2G37210.1); Has 5303 Blast hits to 5301 proteins in 1556 species: Archae - 26; Bacteria - 3660; Metazoa - 10; Fungi - 132; Pl…
'15.3'	'metal handling.regulation'	HORVU4Hr1G073630,3	9.92184	2.29048e-49	'(q58fk4|ard2_orysa : 390.0) 1,2-dihydroxy-3-keto-5-methylthiopentene dioxygenase 2 (EC 1.13.-.-) (Aci-reductone dioxygenase 2) (Submergence-induced protein 2A) - Oryza sativa (Rice) & (loc_os03g06620.1 : 390.0) no description available & (at4g14710 : 337.0) ATARD2; FUNCTIONS IN: acireductone dioxygenase [iron(II)-requiring] activity, metal ion binding; INVOLVED IN: oxidation reduction, L-methion…
'16.2.1'	'secondary metabolism.phenylpropanoids.lignin biosynthesis'	HORVU2Hr1G096890,3	4.22959	2.17184e-79	'(loc_os04g46970.1 : 455.0) no description available & (q6jah0|czog_sorbi : 415.0) Putative cis-zeatin O-glucosyltransferase (EC 2.4.1.215) - Sorghum bicolor (Sorghum) (Sorghum vulgare) & (at4g01070 : 122.0) the glycosyltransferase (UGT72B1) is involved in metabolizing xenobiotica (chloroaniline and chlorophenole). Comparison between wild type and knock-out mutant demonstrates the central role of…
'16.4.1'	'secondary metabolism.N misc.alkaloid-like'	HORVU3Hr1G097180,1	10.3015	1.69193e-91	'(loc_os11g43360.1 : 195.0) no description available & (at5g06060 : 164.0) NAD(P)-binding Rossmann-fold superfamily protein; FUNCTIONS IN: oxidoreductase activity, binding, catalytic activity; INVOLVED IN: oxidation reduction, metabolic process; EXPRESSED IN: 23 plant structures; EXPRESSED DURING: 14 growth stages; CONTAINS InterPro DOMAIN/s: Short-chain dehydrogenase/reductase, conserved site (I…
'16.4.1'	'secondary metabolism.N misc.alkaloid-like'	HORVU3Hr1G090170,12	9.97585	2.3428e-78	'(loc_os11g43200.1 : 188.0) no description available & (at5g06060 : 160.0) NAD(P)-binding Rossmann-fold superfamily protein; FUNCTIONS IN: oxidoreductase activity, binding, catalytic activity; INVOLVED IN: oxidation reduction, metabolic process; EXPRESSED IN: 23 plant structures; EXPRESSED DURING: 14 growth stages; CONTAINS InterPro DOMAIN/s: Short-chain dehydrogenase/reductase, conserved site (I…
'16.8.2.1'	'secondary metabolism.flavonoids.chalcones.naringenin-chalcone synthase'	HORVU6Hr1G003020,3	9.97011	1.80058e-95	'(loc_os05g12240.1 : 466.0) no description available & (o22652|chsy_rapsa : 330.0) Chalcone synthase (EC 2.3.1.74) (Naringenin-chalcone synthase) - Raphanus sativus (Radish) & (at5g13930 : 325.0) Encodes chalcone synthase (CHS), a key enzyme involved in the biosynthesis of flavonoids. Required for the accumulation of purple anthocyanins in leaves and stems. Also involved in the regulation of auxi…
'16.8.4'	'secondary metabolism.flavonoids.flavonols'	HORVU6Hr1G088540,1	9.03205	0	'(loc_os06g08041.1 : 99.8) no description available & (at5g20400 : 88.6) encodes a protein whose sequence is similar to flavanone 3 hydroxylase from Malus.; 2-oxoglutarate (2OG) and Fe(II)-dependent oxygenase superfamily protein; CONTAINS InterPro DOMAIN/s: Oxoglutarate/iron-dependent oxygenase (InterPro:IPR005123); BEST Arabidopsis thaliana protein match is: 2-oxoglutarate (2OG) and Fe(II)-depen…
'16.8.4'	'secondary metabolism.flavonoids.flavonols'	HORVU7Hr1G038510,2	7.45121	8.61308e-26	'(loc_os10g09990.1 : 658.0) no description available & (at2g36800 : 352.0) Encodes a DON-Glucosyltransferase. The UGT73C5 glucosylates both brassinolide and castasterone in the 23-O position. The enzyme is presumably involved in the homeostasis of those steroid hormones hence regulating BR activity. Transgenic plants overexpressing UGT73C5 show a typical BR-deficient phenotype.; don-glucosyltrans…
'16.8.4'	'secondary metabolism.flavonoids.flavonols'	HORVU7Hr1G038510,1	2.68952	1.46835e-37	'(loc_os10g09990.1 : 658.0) no description available & (at2g36800 : 352.0) Encodes a DON-Glucosyltransferase. The UGT73C5 glucosylates both brassinolide and castasterone in the 23-O position. The enzyme is presumably involved in the homeostasis of those steroid hormones hence regulating BR activity. Transgenic plants overexpressing UGT73C5 show a typical BR-deficient phenotype.; don-glucosyltrans…
'16.8.4'	'secondary metabolism.flavonoids.flavonols'	HORVU2Hr1G075920,1	3.72792	0.000104857	'(loc_os10g09990.1 : 232.0) no description available & (at4g34135 : 117.0) The At4g34135 gene encodes a flavonol 7-O-glucosyltransferase (EC 2.4.1.237) that glucosylates also with a 20 fold lower activity flavonols (kaempferol and quercetin) at the 3-O-position.; UDP-glucosyltransferase 73B2 (UGT73B2); FUNCTIONS IN: flavonol 3-O-glucosyltransferase activity, UDP-glycosyltransferase activity, quer…
'17.1.1'	'hormone metabolism.abscisic acid.synthesis-degradation'	HORVU5Hr1G040210,14	8.91588	1.40511e-46	'(loc_os12g06180.1 : 265.0) no description available & (at2g36020 : 103.0) HVA22-like protein J (HVA22J); FUNCTIONS IN: molecular_function unknown; INVOLVED IN: biological_process unknown; LOCATED IN: endomembrane system; EXPRESSED IN: 10 plant structures; EXPRESSED DURING: L mature pollen stage, M germinated pollen stage, 4 anthesis, C globular stage, petal differentiation and expansion stage; C…
'17.1.3'	'hormone metabolism.abscisic acid.induced-regulated-responsive-activated'	HORVU1Hr1G059870,4	8.8857	1.85269e-29	'(q05190|le19a_horvu : 153.0) Late embryogenesis abundant protein B19.1A (B19.1) - Hordeum vulgare (Barley) & (loc_os05g28210.1 : 138.0) no description available & (at2g40170 : 115.0) Encodes a group 1 LEA gene that is activated by direct binding of ABI5 to its promoter and is involved in response to ABA. Is required for normal seed development. Involved in regulating the timing of dessication to…
'17.1.3'	'hormone metabolism.abscisic acid.induced-regulated-responsive-activated'	HORVU1Hr1G059900,1	11.3993	3.09344e-175	'(q05190|le19a_horvu : 155.0) Late embryogenesis abundant protein B19.1A (B19.1) - Hordeum vulgare (Barley) & (loc_os05g28210.1 : 135.0) no description available & (at2g40170 : 114.0) Encodes a group 1 LEA gene that is activated by direct binding of ABI5 to its promoter and is involved in response to ABA. Is required for normal seed development. Involved in regulating the timing of dessication to…
'17.1.3'	'hormone metabolism.abscisic acid.induced-regulated-responsive-activated'	HORVU7Hr1G045630,8	9.27146	2.02346e-41	'(q07764|hva22_horvu : 255.0) Protein HVA22 - Hordeum vulgare (Barley) & (loc_os08g36440.1 : 216.0) no description available & (at5g50720 : 163.0) Encodes one of five HVA22 homologs in Arabidopsis. HVA22 is an ABA- and stress-inducible gene first isolated from barley. Members of this gene family have only been found in eukaryotes. AtHVA22e mRNA is upregulated to varying degrees in response to col…
'17.1.3'	'hormone metabolism.abscisic acid.induced-regulated-responsive-activated'	HORVU1Hr1G059950,1	8.76155	1.19265e-12	'(q02400|le193_horvu : 177.0) Late embryogenesis abundant protein B19.3 (LEA B19.3) - Hordeum vulgare (Barley) & (loc_os05g28210.1 : 151.0) no description available & (at3g51810 : 138.0) Encodes a ABA-inducible protein that accumulates during seed maturation, in parallel with its corresponding mRNA but with a 3 d delay. During germination, AtEm1 protein undergoes two successive cleavages before b…
'17.2.3'	'hormone metabolism.auxin.induced-regulated-responsive-activated'	HORVU1Hr1G092890,6	8.88264	3.32146e-92	'(q6i581|gh35_orysa : 1001.0) Probable indole-3-acetic acid-amido synthetase GH3.5 (EC 6.3.2.-) (Auxin-responsive GH3-like protein 5) (OsGH3-5) - Oryza sativa (Rice) & (loc_os05g50890.2 : 1001.0) no description available & (at2g46370 : 692.0) Encodes a jasmonate-amido synthetase that is a member of the GH3 family of proteins. JAR1 catalyzes the formation of a biologically active jasmonyl-isoleuci…
'17.2.3'	'hormone metabolism.auxin.induced-regulated-responsive-activated'	HORVU4Hr1G071330,1	9.26209	2.89172e-35	'(loc_os03g09880.1 : 227.0) no description available & (at5g47530 : 114.0) Auxin-responsive family protein; CONTAINS InterPro DOMAIN/s: Cytochrome b561, eukaryote (InterPro:IPR004877), Uncharacterised conserved protein UCP037471 (InterPro:IPR017214), Protein of unknown function DUF568, DOMON-like (InterPro:IPR007613), DOMON related (InterPro:IPR005018), Cytochrome b561/ferric reductase transmembr…
'17.2.3'	'hormone metabolism.auxin.induced-regulated-responsive-activated'	HORVU7Hr1G039930,2	10.8887	1.09957e-52	'(loc_os10g28320.3 : 373.0) no description available & (at1g60750 : 258.0) NAD(P)-linked oxidoreductase superfamily protein; FUNCTIONS IN: oxidoreductase activity; INVOLVED IN: oxidation reduction; CONTAINS InterPro DOMAIN/s: Aldo/keto reductase (InterPro:IPR001395), Aldo/keto reductase subgroup (InterPro:IPR020471); BEST Arabidopsis thaliana protein match is: NAD(P)-linked oxidoreductase superfa…
'17.2.3'	'hormone metabolism.auxin.induced-regulated-responsive-activated'	HORVU2Hr1G118550,3	10.1749	5.08758e-60	'(loc_os04g58280.2 : 190.0) no description available & (at4g27450 : 179.0) Aluminium induced protein with YGL and LRDR motifs; FUNCTIONS IN: molecular_function unknown; INVOLVED IN: biological_process unknown; LOCATED IN: cytosol, nucleus, plasma membrane; EXPRESSED IN: 25 plant structures; EXPRESSED DURING: 14 growth stages; BEST Arabidopsis thaliana protein match is: Aluminium induced protein w…
'17.2.3'	'hormone metabolism.auxin.induced-regulated-responsive-activated'	HORVU5Hr1G105840,4	10.1674	6.74966e-146	'(loc_os03g58170.2 : 283.0) no description available & (at3g22850 : 247.0) Aluminium induced protein with YGL and LRDR motifs; FUNCTIONS IN: molecular_function unknown; INVOLVED IN: biological_process unknown; LOCATED IN: cytosol, nucleus, plasma membrane; EXPRESSED IN: 24 plant structures; EXPRESSED DURING: 15 growth stages; BEST Arabidopsis thaliana protein match is: Aluminium induced protein w…
'17.3.2.1'	'hormone metabolism.brassinosteroid.signal transduction.BRI'	HORVU7Hr1G099340,16	9.2503	1.69193e-91	'(loc_os06g47530.1 : 329.0) no description available & (at4g23310 : 101.0) Encodes a cysteine-rich receptor-like protein kinase.; cysteine-rich RLK (RECEPTOR-like protein kinase) 23 (CRK23); FUNCTIONS IN: protein serine/threonine kinase activity, protein kinase activity, ATP binding; INVOLVED IN: defense response; LOCATED IN: endomembrane system; EXPRESSED IN: stem, leaf whorl, leaf; EXPRESSED DU…
'17.4.1'	'hormone metabolism.cytokinin.synthesis-degradation'	HORVU1Hr1G011480,1	3.59826	1.11696e-44	'(loc_os03g24240.1 : 389.0) no description available & (at3g63110 : 229.0) Encodes cytokinin synthase involved in cytokinin biosynthesis. IPT3 subcellular localization is modulated by farnesylation- when farnesylated it is localized to the nucleus, otherwise to the chloroplast.; isopentenyltransferase 3 (IPT3); CONTAINS InterPro DOMAIN/s: tRNA isopentenyltransferase (InterPro:IPR002627); BEST Ara…
'17.4.1'	'hormone metabolism.cytokinin.synthesis-degradation'	HORVU1Hr1G057860,6	4.90689	3.78048e-07	'(loc_os05g31040.1 : 473.0) no description available & (at2g41510 : 352.0) It encodes a protein whose sequence is similar to cytokinin oxidase/dehydrogenase, which catalyzes the degradation of cytokinins.; cytokinin oxidase/dehydrogenase 1 (CKX1); FUNCTIONS IN: cytokinin dehydrogenase activity; INVOLVED IN: N-terminal protein myristoylation, cytokinin catabolic process, meristem development; LOCA…
'17.4.1'	'hormone metabolism.cytokinin.synthesis-degradation'	HORVU1Hr1G057860,12	5.78136	4.99646e-10	'(loc_os05g31040.1 : 473.0) no description available & (at2g41510 : 352.0) It encodes a protein whose sequence is similar to cytokinin oxidase/dehydrogenase, which catalyzes the degradation of cytokinins.; cytokinin oxidase/dehydrogenase 1 (CKX1); FUNCTIONS IN: cytokinin dehydrogenase activity; INVOLVED IN: N-terminal protein myristoylation, cytokinin catabolic process, meristem development; LOCA…
'17.4.1'	'hormone metabolism.cytokinin.synthesis-degradation'	HORVU2Hr1G004720,3	8.91886	9.57112e-78	'(loc_os02g36830.1 : 646.0) no description available & (at1g22360 : 471.0) UDP-glucosyl transferase 85A2 (UGT85A2); FUNCTIONS IN: UDP-glycosyltransferase activity, transferase activity, transferring glycosyl groups, glucuronosyltransferase activity; INVOLVED IN: metabolic process; LOCATED IN: cellular_component unknown; EXPRESSED IN: 21 plant structures; EXPRESSED DURING: 11 growth stages; CONTAI…
'17.4.1'	'hormone metabolism.cytokinin.synthesis-degradation'	HORVU2Hr1G004720,1	5.64386	5.20998e-05	'(loc_os02g36830.1 : 646.0) no description available & (at1g22360 : 471.0) UDP-glucosyl transferase 85A2 (UGT85A2); FUNCTIONS IN: UDP-glycosyltransferase activity, transferase activity, transferring glycosyl groups, glucuronosyltransferase activity; INVOLVED IN: metabolic process; LOCATED IN: cellular_component unknown; EXPRESSED IN: 21 plant structures; EXPRESSED DURING: 11 growth stages; CONTAI…
'17.4.1'	'hormone metabolism.cytokinin.synthesis-degradation'	HORVU7Hr1G118130,16	6.65821	1.12068e-08	'(loc_os08g35860.1 : 239.0) no description available & (at5g21482 : 165.0) This gene used to be called AtCKX5. It encodes a protein whose sequence is similar to cytokinin oxidase/dehydrogenase, which catalyzes the degradation of cytokinins.; cytokinin oxidase 7 (CKX7); CONTAINS InterPro DOMAIN/s: Cytokinin dehydrogenase 1, FAD/cytokinin binding domain (InterPro:IPR015345), FAD-binding, type 2 (In…
'17.4.1'	'hormone metabolism.cytokinin.synthesis-degradation'	HORVU3Hr1G019850,4	7.44294	1.26925e-16	'(loc_os01g09260.1 : 169.0) no description available & (q9t0n8|ckx1_maize : 166.0) Cytokinin dehydrogenase 1 precursor (EC 1.5.99.12) (Cytokinin oxidase 1) (CKO 1) (COX 1) (ZmCKX1) - Zea mays (Maize) & (at4g29740 : 133.0) It encodes a protein whose sequence is similar to cytokinin oxidase/dehydrogenase, which catalyzes the degradation of cytokinins.; cytokinin oxidase 4 (CKX4); FUNCTIONS IN: prim…
'17.5.3'	'hormone metabolism.ethylene.induced-regulated-responsive-activated'	HORVU5Hr1G095160,1	9.70217	1.25723e-38	'(loc_os03g53900.4 : 85.9) no description available & (at3g11930 : 80.9) Adenine nucleotide alpha hydrolases-like superfamily protein; FUNCTIONS IN: molecular_function unknown; INVOLVED IN: response to stress; LOCATED IN: cellular_component unknown; EXPRESSED IN: 18 plant structures; EXPRESSED DURING: 9 growth stages; CONTAINS InterPro DOMAIN/s: UspA (InterPro:IPR006016), Rossmann-like alpha/beta…
'17.7.1.10'	'hormone metabolism.jasmonate.synthesis-degradation.jasmonate-O-methyltransferase'	HORVU3Hr1G100190,3	9.26679	3.03386e-72	'(loc_os06g22440.1 : 355.0) no description available & (at5g04370 : 186.0) A member of the Arabidopsis SABATH methyltransferase gene family. Encodes NAMT1, a methyltransferase that methylates nicotinic acid.; NAMT1; CONTAINS InterPro DOMAIN/s: SAM dependent carboxyl methyltransferase (InterPro:IPR005299); BEST Arabidopsis thaliana protein match is: S-adenosyl-L-methionine-dependent methyltransfer…
'17.7.1.2'	'hormone metabolism.jasmonate.synthesis-degradation.lipoxygenase'	HORVU5Hr1G093700,20	9.41785	7.6082e-165	'(p29250|lox2_orysa : 367.0) Lipoxygenase 2 (EC 1.13.11.12) (Lipoxygenase L-2) - Oryza sativa (Rice) & (loc_os03g52860.1 : 367.0) no description available & (at1g55020 : 228.0) lipoxygenase, a defense gene conferring resistance Xanthomonas campestris; lipoxygenase 1 (LOX1); CONTAINS InterPro DOMAIN/s: Lipoxygenase, iron binding site (InterPro:IPR020833), Lipoxygenase, C-terminal (InterPro:IPR0138…
'17.7.1.2'	'hormone metabolism.jasmonate.synthesis-degradation.lipoxygenase'	HORVU4Hr1G005920,5	9.24555	5.93134e-149	'(p29114|lox1_horvu : 1231.0) Lipoxygenase 1 (EC 1.13.11.12) - Hordeum vulgare (Barley) & (loc_os03g52860.1 : 953.0) no description available & (at1g55020 : 674.0) lipoxygenase, a defense gene conferring resistance Xanthomonas campestris; lipoxygenase 1 (LOX1); CONTAINS InterPro DOMAIN/s: Lipoxygenase, iron binding site (InterPro:IPR020833), Lipoxygenase, C-terminal (InterPro:IPR013819), Lipoxyge…
'17.7.1.3'	'hormone metabolism.jasmonate.synthesis-degradation.allene oxidase synthase'	HORVU6Hr1G039440,2	9.78627	8.21354e-134	'(q6z6k9|c74a4_orysa : 380.0) Cytochrome P450 74A4 (EC 4.2.1.92) (Allene oxide synthase 4) (Hydroperoxide dehydrase 4) - Oryza sativa (Rice) & (loc_os02g12690.1 : 380.0) no description available & (at5g42650 : 178.0) Encodes a member of the cytochrome p450 CYP74 gene family that functions as an allene oxide synthase. This enzyme catalyzes dehydration of the hydroperoxide to an unstable allene oxi…
'20'	'stress'	HORVU3Hr1G006620,8	9.09803	6.57574e-77	'(loc_os10g04720.1 : 581.0) no description available & (at4g23280 : 391.0) Encodes a cysteine-rich receptor-like protein kinase.; cysteine-rich RLK (RECEPTOR-like protein kinase) 20 (CRK20); FUNCTIONS IN: kinase activity; INVOLVED IN: defense response to bacterium, defense response, programmed cell death, response to salicylic acid stimulus; LOCATED IN: chloroplast; EXPRESSED IN: 18 plant structu…
'20'	'stress'	HORVU2Hr1G115730,2	10.007	9.71444e-120	'(loc_os04g54630.1 : 182.0) no description available & (at2g21970 : 138.0) stress enhanced protein 2 (SEP2) chlorophyll a/b-binding protein; stress enhanced protein 2 (SEP2); Has 34 Blast hits to 34 proteins in 10 species: Archae - 0; Bacteria - 0; Metazoa - 0; Fungi - 0; Plants - 34; Viruses - 0; Other Eukaryotes - 0 (source: NCBI BLink). & (reliability: 276.0) & (original description: no origin…
'20.1'	'stress.biotic'	HORVU2Hr1G085270,11	9.14211	7.04478e-47	'(loc_os04g41620.1 : 109.0) no description available & (p29022|chia_maize : 95.9) Endochitinase A precursor (EC 3.2.1.14) (Seed chitinase A) - Zea mays (Maize) & (at3g54420 : 85.9) encodes an EP3 chitinase that is expressed during somatic embryogenesis in 'nursing' cells surrounding the embryos but not in embryos themselves. The gene is also expressed in mature pollen and growing pollen tubes unt…
'20.1'	'stress.biotic'	HORVU2Hr1G119500,1	10.4362	0	'(loc_os04g58090.1 : 261.0) no description available & (at5g36970 : 119.0) NDR1/HIN1-like protein, expression induced during incompatible response to a pathogen, expression is at least partly dependent on the salicylic acid signaling pathway; NDR1/HIN1-like 25 (NHL25); FUNCTIONS IN: molecular_function unknown; INVOLVED IN: defense response, incompatible interaction, salicylic acid mediated signal…
'20.1'	'stress.biotic'	HORVU4Hr1G082390,1	10.7184	0	'(loc_os03g03810.1 : 107.0) no description available & (at2g02130 : 95.9) Predicted to encode a PR (pathogenesis-related) protein. Belongs to the plant defensin (PDF) family with the following members: At1g75830/PDF1.1, At5g44420/PDF1.2a, At2g26020/PDF1.2b, At5g44430/PDF1.2c, At2g26010/PDF1.3, At1g19610/PDF1.4, At1g55010/PDF1.5, At2g02120/PDF2.1, At2g02100/PDF2.2, At2g02130/PDF2.3, At1g61070/PDF2…
'20.1'	'stress.biotic'	HORVU5Hr1G051970,3	11.4778	3.80676e-201	'(loc_os12g43450.1 : 119.0) no description available & (p31110|tlp_orysa : 102.0) Thaumatin-like protein precursor - Oryza sativa (Rice) & (at4g11650 : 97.4) osmotin-like protein; osmotin 34 (OSM34); INVOLVED IN: defense response to fungus, incompatible interaction, response to salt stress, defense response to bacterium, incompatible interaction, response to other organism; LOCATED IN: endomembra…
'20.1'	'stress.biotic'	HORVU7Hr1G121850,2	9.05619	1.39955e-160	'(q9frv1|chia_secce : 513.0) Basic endochitinase A precursor (EC 3.2.1.14) (Rye seed chitinase-a) (RSC-a) - Secale cereale (Rye) & (loc_os06g51060.1 : 432.0) no description available & (at3g12500 : 393.0) encodes a basic chitinase involved in ethylene/jasmonic acid mediated signalling pathway during systemic acquired resistance based on expression analyses.; basic chitinase (HCHIB); FUNCTIONS IN:…
'20.1'	'stress.biotic'	HORVU7Hr1G121860,1	12.3032	0	'(p23951|chi2_horvu : 492.0) 26 kDa endochitinase 2 precursor (EC 3.2.1.14) (CHI-26) - Hordeum vulgare (Barley) & (loc_os06g51060.1 : 388.0) no description available & (at3g12500 : 387.0) encodes a basic chitinase involved in ethylene/jasmonic acid mediated signalling pathway during systemic acquired resistance based on expression analyses.; basic chitinase (HCHIB); FUNCTIONS IN: chitinase activi…
'20.1'	'stress.biotic'	HORVU7Hr1G005720,1	10.1836	5.05298e-57	'(q9sme8|dad2_horvu : 223.0) Defender against cell death 2 (DAD-2) - Hordeum vulgare (Barley) & (loc_os04g32550.1 : 211.0) no description available & (at1g32210 : 182.0) Encodes protein involved in suppression of apoptosis. Complements a mammalian apoptosis suppressor mutation.; DEFENDER AGAINST APOPTOTIC DEATH 1 (ATDAD1); FUNCTIONS IN: molecular_function unknown; INVOLVED IN: anti-apoptosis; LOC…
'20.1'	'stress.biotic'	HORVU6Hr1G044440,10	8.74147	3.94746e-55	'(loc_os06g27830.1 : 326.0) no description available & (at5g64550 : 195.0) loricrin-related; BEST Arabidopsis thaliana protein match is: loricrin-related (TAIR:AT5G09670.1); Has 1807 Blast hits to 1807 proteins in 277 species: Archae - 0; Bacteria - 0; Metazoa - 736; Fungi - 347; Plants - 385; Viruses - 0; Other Eukaryotes - 339 (source: NCBI BLink). & (reliability: 380.0) & (original description…
'20.1.7'	'stress.biotic.PR-proteins'	HORVU2Hr1G043890,3	9.9542	1.39708e-90	'(q7gcm7|xip1_orysa : 332.0) Xylanase inhibitor protein 1 precursor (Class III chitinase homolog a) (RIXI protein) - Oryza sativa (Rice) & (loc_os11g47580.1 : 332.0) no description available & (at5g24090 : 172.0) Chitinase A (class III) expressed exclusively under environmental stress conditions.; chitinase A (CHIA); FUNCTIONS IN: cation binding, hydrolase activity, hydrolyzing O-glycosyl compoun…
'20.1.7.6'	'stress.biotic.PR-proteins.proteinase inhibitors'	HORVU5Hr1G111860,2	10.7313	1.00415e-114	'(loc_os03g41419.1 : 355.0) no description available & (p06293|prtz_horvu : 353.0) Protein Z (Z4) (Major endosperm albumin) - Hordeum vulgare (Barley) & (at1g47710 : 265.0) Serine protease inhibitor (SERPIN) family protein; FUNCTIONS IN: serine-type endopeptidase inhibitor activity, cysteine-type endopeptidase inhibitor activity; INVOLVED IN: biological_process unknown; LOCATED IN: apoplast; EXPR…
'20.2'	'stress.abiotic'	HORVU2Hr1G103670,4	9.61471	9.32768e-62	'(loc_os04g52890.1 : 239.0) no description available & (at5g62100 : 132.0) A member of Arabidopsis BAG (Bcl-2-associated athanogene) proteins, plant homologs of mammalian regulators of apoptosis. Plant BAG proteins are multi-functional and remarkably similar to their animal counterparts, as they regulate apoptotic-like processes ranging from pathogen attack, to abiotic stress, to plant developmen…
'20.2.1'	'stress.abiotic.heat'	HORVU2Hr1G077710,1	12.0984	0	'(loc_os04g36750.1 : 233.0) no description available & (p30236|hsp41_soybn : 157.0) 22.0 kDa class IV heat shock protein precursor - Glycine max (Soybean) & (at4g10250 : 150.0) Columbia endomembrane-localized small heat shock protein; ATHSP22.0; FUNCTIONS IN: molecular_function unknown; INVOLVED IN: response to heat; LOCATED IN: endomembrane system; EXPRESSED IN: 8 plant structures; EXPRESSED DUR…
'20.2.1'	'stress.abiotic.heat'	HORVU3Hr1G007500,5	12.7389	3.5708e-139	'(p12810|hsp11_wheat : 233.0) 16.9 kDa class I heat shock protein (Low molecular weight heat shock protein) (Heat shock protein 17) (HSP 16.9) - Triticum aestivum (Wheat) & (loc_os01g04370.1 : 193.0) no description available & (at5g59720 : 166.0) encodes a low molecular weight heat shock protein that contains the heat shock element in the promoter region. Expression is induced in response to heat…
'20.2.1'	'stress.abiotic.heat'	HORVU4Hr1G059260,1	13.5947	0	'(loc_os03g16920.1 : 1118.0) no description available & (p09189|hsp7c_pethy : 1079.0) Heat shock cognate 70 kDa protein - Petunia hybrida (Petunia) & (at5g02500 : 1069.0) encodes a member of heat shock protein 70 family.; heat shock cognate protein 70-1 (HSC70-1); FUNCTIONS IN: ATP binding; INVOLVED IN: protein folding, response to cold, response to virus, response to heat; LOCATED IN: cytosol, a…
'20.2.1'	'stress.abiotic.heat'	HORVU4Hr1G061700,4	11.2372	3.5708e-139	'(loc_os03g15480.1 : 311.0) no description available & (at5g22080 : 254.0) Chaperone DnaJ-domain superfamily protein; FUNCTIONS IN: heat shock protein binding; INVOLVED IN: protein folding; LOCATED IN: cellular_component unknown; CONTAINS InterPro DOMAIN/s: Heat shock protein DnaJ, N-terminal (InterPro:IPR001623); BEST Arabidopsis thaliana protein match is: DNAJ heat shock N-terminal domain-conta…
'20.2.1'	'stress.abiotic.heat'	HORVU7Hr1G009230,2	8.87036	1.41042e-68	'(loc_os06g02620.1 : 521.0) no description available & (at5g48030 : 363.0) encodes a mitochondrially targeted DNAJ protein involved in female gametophyte development.; gametophytic factor 2 (GFA2); FUNCTIONS IN: unfolded protein binding, heat shock protein binding; INVOLVED IN: in 7 processes; LOCATED IN: mitochondrion; EXPRESSED IN: 25 plant structures; EXPRESSED DURING: 13 growth stages; CONTAI…
'20.2.1'	'stress.abiotic.heat'	HORVU7Hr1G036470,15	8.92481	1.87039e-07	'(loc_os06g11610.1 : 158.0) no description available & (p46254|hs22m_pea : 90.5) Heat shock 22 kDa protein, mitochondrial precursor - Pisum sativum (Garden pea) & (at4g25200 : 89.0) AtHSP23.6-mito mRNA, nuclear gene encoding mitochondrial; mitochondrion-localized small heat shock protein 23.6 (HSP23.6-MITO); FUNCTIONS IN: molecular_function unknown; INVOLVED IN: response to cadmium ion, response …
'20.2.1'	'stress.abiotic.heat'	HORVU7Hr1G043340,3	8.97441	5.08758e-60	'(loc_os12g27070.1 : 202.0) no description available & (at5g06410 : 150.0) DNAJ heat shock N-terminal domain-containing protein; FUNCTIONS IN: heat shock protein binding, chaperone binding; INVOLVED IN: protein folding; EXPRESSED IN: 22 plant structures; EXPRESSED DURING: 13 growth stages; CONTAINS InterPro DOMAIN/s: Heat shock cognate protein B, C-terminal oligomerisation (InterPro:IPR009073), H…
'20.2.1'	'stress.abiotic.heat'	HORVU3Hr1G020520,3	8.84549	9.2099e-19	'(p24631|hsp21_maize : 116.0) 17.5 kDa class II heat shock protein - Zea mays (Maize) & (loc_os01g08860.1 : 94.4) no description available & (at5g12020 : 89.0) 17.6 kDa class II heat shock protein (HSP17.6II); CONTAINS InterPro DOMAIN/s: Heat shock protein Hsp20 (InterPro:IPR002068), HSP20-like chaperone (InterPro:IPR008978); BEST Arabidopsis thaliana protein match is: heat shock protein 17.6A (T…
'20.2.2'	'stress.abiotic.cold'	HORVU1Hr1G016770,8	8.90989	1.23943e-71	'(loc_os05g04470.1 : 141.0) no description available & (at1g05260 : 88.2) Encodes a cold-inducible cationic peroxidase that is involved in the stress response. In response to low temperature, RCI3 transcripts accumulate in the aerial part and in roots of etiolated seedlings but only in roots of light-grown seedlings.; RARE COLD INDUCIBLE GENE 3 (RCI3); FUNCTIONS IN: peroxidase activity; INVOLVED …
'20.2.3'	'stress.abiotic.drought/salt'	HORVU1Hr1G012710,2	9.74147	1.82645e-62	'(at2g38905 : 101.0) Low temperature and salt responsive protein family; INVOLVED IN: response to cold, hyperosmotic salinity response; LOCATED IN: endomembrane system, integral to membrane; EXPRESSED IN: 10 plant structures; EXPRESSED DURING: M germinated pollen stage, 4 anthesis, petal differentiation and expansion stage; CONTAINS InterPro DOMAIN/s: Uncharacterised protein family UPF0057 (Inter…
'20.2.99'	'stress.abiotic.unspecified'	HORVU2Hr1G104220,1	9.16742	1.24533e-60	'(loc_os04g52720.1 : 313.0) no description available & (at5g39160 : 230.0) RmlC-like cupins superfamily protein; FUNCTIONS IN: manganese ion binding, nutrient reservoir activity; INVOLVED IN: biological_process unknown; LOCATED IN: endomembrane system, apoplast; CONTAINS InterPro DOMAIN/s: Cupin, RmlC-type (InterPro:IPR011051), Cupin 1 (InterPro:IPR006045), Germin (InterPro:IPR001929), RmlC-like …
'20.2.99'	'stress.abiotic.unspecified'	HORVU2Hr1G104240,1	8.89178	3.11446e-47	'(loc_os04g52720.1 : 314.0) no description available & (at5g39160 : 232.0) RmlC-like cupins superfamily protein; FUNCTIONS IN: manganese ion binding, nutrient reservoir activity; INVOLVED IN: biological_process unknown; LOCATED IN: endomembrane system, apoplast; CONTAINS InterPro DOMAIN/s: Cupin, RmlC-type (InterPro:IPR011051), Cupin 1 (InterPro:IPR006045), Germin (InterPro:IPR001929), RmlC-like …
'20.2.99'	'stress.abiotic.unspecified'	HORVU7Hr1G091800,8	9.66178	1.16765e-58	'(loc_os08g13440.2 : 253.0) no description available & (at5g39110 : 166.0) RmlC-like cupins superfamily protein; FUNCTIONS IN: manganese ion binding, nutrient reservoir activity; INVOLVED IN: biological_process unknown; LOCATED IN: endomembrane system, apoplast; CONTAINS InterPro DOMAIN/s: Cupin, RmlC-type (InterPro:IPR011051), Cupin 1 (InterPro:IPR006045), RmlC-like jelly roll fold (InterPro:IPR…
'21.99'	'redox.misc'	HORVU3Hr1G079960,2	9.17991	1.87089e-39	'(loc_os01g59930.1 : 330.0) no description available & (at5g17770 : 287.0) Encodes NADH:cytochrome (Cyt) b5 reductase that displayed strict specificity to NADH for the reduction of a recombinant Cyt b5 (AtB5-A), whereas no Cyt b5 reduction was observed when NADPH was used as the electron donor.; NADH:cytochrome B5 reductase 1 (CBR); FUNCTIONS IN: cytochrome-b5 reductase activity; INVOLVED IN: ele…
'22.1.5'	'polyamine metabolism.synthesis.N-carbamoylputrescine amidohydrolase'	HORVU5Hr1G006730,5	10.8273	6.20086e-233	'(q93xi4|agub_orysa : 459.0) N-carbamoylputrescine amidase (EC 3.5.1.53) - Oryza sativa (Rice) & (loc_os02g33080.1 : 459.0) no description available & (at2g27450 : 411.0) Encodes N-carbamoylputrescine amidohydrolase that is involved in putrescine and polyamine biosynthesis.; nitrilase-like protein 1 (NLP1); CONTAINS InterPro DOMAIN/s: Nitrilase/cyanide hydratase and apolipoprotein N-acyltransfera…
'23.2'	'nucleotide metabolism.degradation'	HORVU2Hr1G014130,20	8.9571	1.86152e-18	'(q84np7|ampd_orysa : 986.0) Probable AMP deaminase (EC 3.5.4.6) - Oryza sativa (Rice) & (loc_os07g49270.1 : 986.0) no description available & (at2g38280 : 898.0) Encodes a protein with in vitro AMP deaminase activity that is involved in embryogenesis. Homozygous mutant embryos fail to develop past the zygote stage.; EMBRYONIC FACTOR1 (FAC1); FUNCTIONS IN: AMP deaminase activity; INVOLVED IN: pur…
'23.3.1.1'	'nucleotide metabolism.salvage.phosphoribosyltransferases.aprt'	HORVU6Hr1G056910,3	9.03067	2.16426e-18	'(loc_os02g40010.2 : 257.0) no description available & (q43199|apt1_wheat : 207.0) Adenine phosphoribosyltransferase 1 (EC 2.4.2.7) (APRT 1) - Triticum aestivum (Wheat) & (at1g80050 : 202.0) Encodes an adenosine phosphoribosyl transferase(E.C:2.4.2.7), a constitutively expressed enzyme involved in the one-step salvage of adenine to AMP. This isozyme has high affinity for cytokinins and is likely …
'23.5.3'	'nucleotide metabolism.deoxynucleotide metabolism.cytosine deaminase'	HORVU7Hr1G021460,3	8.82018	4.64612e-122	'(loc_os09g04210.3 : 211.0) no description available & (at5g24670 : 149.0) Cytidine/deoxycytidylate deaminase family protein; FUNCTIONS IN: hydrolase activity, zinc ion binding, catalytic activity; INVOLVED IN: biological_process unknown; LOCATED IN: cellular_component unknown; EXPRESSED IN: 23 plant structures; EXPRESSED DURING: 13 growth stages; CONTAINS InterPro DOMAIN/s: CMP/dCMP deaminase, z…
'24.2'	'Biodegradation of Xenobiotics.lactoylglutathione lyase'	HORVU7Hr1G085150,3	9.36851	9.1225e-75	'(q948t6|lgul_orysa : 204.0) Lactoylglutathione lyase (EC 4.4.1.5) (Methylglyoxalase) (Aldoketomutase) (Glyoxalase I) (Glx I) (Ketone-aldehyde mutase) (S-D-lactoylglutathione methylglyoxal lyase) (Allergen Ory s ?) (Allergen Glb33) (PP33) - Oryza sativa (Rice) & (loc_os08g09250.3 : 204.0) no description available & (at1g67280 : 167.0) Glyoxalase/Bleomycin resistance protein/Dioxygenase superfamil…
'26.10'	'misc.cytochrome P450'	HORVU2Hr1G004550,2	9.47371	1.75123e-137	'(loc_os02g01890.1 : 520.0) no description available & (at1g64940 : 348.0) member of CYP89A; "cytochrome P450, family 87, subfamily A, polypeptide 6" (CYP89A6); FUNCTIONS IN: electron carrier activity, monooxygenase activity, iron ion binding, oxygen binding, heme binding; INVOLVED IN: oxidation reduction; LOCATED IN: endomembrane system; CONTAINS InterPro DOMAIN/s: Cytochrome P450 (InterPro:IPR0…
'26.10'	'misc.cytochrome P450'	HORVU2Hr1G027480,3	8.87036	1.6824e-69	'(loc_os07g23570.1 : 421.0) no description available & (at2g46950 : 301.0) member of CYP709B; "cytochrome P450, family 709, subfamily B, polypeptide 2" (CYP709B2); FUNCTIONS IN: electron carrier activity, monooxygenase activity, iron ion binding, oxygen binding, heme binding; INVOLVED IN: oxidation reduction; LOCATED IN: endomembrane system; EXPRESSED IN: 14 plant structures; EXPRESSED DURING: 4 …
'26.10'	'misc.cytochrome P450'	HORVU6Hr1G092740,2	9.41574	2.6158e-119	'(loc_os02g57810.1 : 729.0) no description available & (at5g52400 : 517.0) member of CYP715A; "cytochrome P450, family 715, subfamily A, polypeptide 1" (CYP715A1); FUNCTIONS IN: electron carrier activity, monooxygenase activity, iron ion binding, oxygen binding, heme binding; INVOLVED IN: response to salt stress; LOCATED IN: endomembrane system; EXPRESSED IN: 8 plant structures; EXPRESSED DURING:…
'26.10'	'misc.cytochrome P450'	HORVU2Hr1G004600,1	8.7879	3.24388e-38	'(loc_os04g10160.1 : 417.0) no description available & (o48957|c99a1_sorbi : 345.0) Cytochrome P450 CYP99A1 (EC 1.14.-.-) (Fragment) - Sorghum bicolor (Sorghum) (Sorghum vulgare) & (at3g26310 : 198.0) putative cytochrome P450; "cytochrome P450, family 71, subfamily B, polypeptide 35" (CYP71B35); FUNCTIONS IN: electron carrier activity, monooxygenase activity, iron ion binding, oxygen binding, hem…
'26.12'	'misc.peroxidases'	HORVU3Hr1G112350,1	14.3928	0	'(loc_os01g73220.1 : 511.0) no description available & (at1g71695 : 375.0) Peroxidase superfamily protein; FUNCTIONS IN: peroxidase activity, heme binding; INVOLVED IN: response to oxidative stress, oxidation reduction; LOCATED IN: cell wall, vacuole, membrane, plant-type cell wall; EXPRESSED IN: 23 plant structures; EXPRESSED DURING: 13 growth stages; CONTAINS InterPro DOMAIN/s: Haem peroxidase …
'26.12'	'misc.peroxidases'	HORVU7Hr1G013470,1	8.94009	0	'(loc_os01g73220.1 : 456.0) no description available & (at1g71695 : 355.0) Peroxidase superfamily protein; FUNCTIONS IN: peroxidase activity, heme binding; INVOLVED IN: response to oxidative stress, oxidation reduction; LOCATED IN: cell wall, vacuole, membrane, plant-type cell wall; EXPRESSED IN: 23 plant structures; EXPRESSED DURING: 13 growth stages; CONTAINS InterPro DOMAIN/s: Haem peroxidase …
'26.13'	'misc.acid and other phosphatases'	HORVU4Hr1G067950,12	9.45738	1.79204e-106	'(loc_os03g11530.1 : 787.0) no description available & (at1g13750 : 654.0) Purple acid phosphatases superfamily protein; FUNCTIONS IN: hydrolase activity, protein serine/threonine phosphatase activity, metal ion binding, acid phosphatase activity; INVOLVED IN: biological_process unknown; LOCATED IN: endomembrane system; EXPRESSED IN: 21 plant structures; EXPRESSED DURING: 13 growth stages; CONTAI…
'26.13'	'misc.acid and other phosphatases'	HORVU7Hr1G054090,13	9.84862	7.22168e-44	'(loc_os08g41880.1 : 305.0) no description available & (at1g13750 : 191.0) Purple acid phosphatases superfamily protein; FUNCTIONS IN: hydrolase activity, protein serine/threonine phosphatase activity, metal ion binding, acid phosphatase activity; INVOLVED IN: biological_process unknown; LOCATED IN: endomembrane system; EXPRESSED IN: 21 plant structures; EXPRESSED DURING: 13 growth stages; CONTAI…
'26.16'	'misc.myrosinases-lectin-jacalin'	HORVU2Hr1G094960,6	9.48784	5.72214e-59	'(loc_os04g48270.3 : 294.0) no description available & (at3g61060 : 228.0) phloem protein 2-A13 (PP2-A13); CONTAINS InterPro DOMAIN/s: F-box domain, cyclin-like (InterPro:IPR001810), F-box domain, Skp2-like (InterPro:IPR022364); BEST Arabidopsis thaliana protein match is: phloem protein 2-A12 (TAIR:AT1G12710.1); Has 35333 Blast hits to 34131 proteins in 2444 species: Archae - 798; Bacteria - 2242…
'26.22'	'misc.short chain dehydrogenase/reductase (SDR)'	HORVU2Hr1G070360,3	9.81218	1.90713e-110	'(at5g50700 : 343.0) Encodes a hydroxysteroid dehydrogenase HSD1. Two copies of HSD1 (At5g50600 and At5g50700) exist in the Arabidopsis genome as a result of an exact 33-kb duplication on chromosome 5 encompassing seven genes. There are five homologs of HSD1 in Arabidopsis (HSD2-At3g47350, HSD3-At3g47360, HSD4-At5g50590, HSD4-At5g50690 and HSD6-At5g50770; HSD4 has two copies due to the same gene …
'26.22'	'misc.short chain dehydrogenase/reductase (SDR)'	HORVU7Hr1G011180,2	8.77808	5.21328e-46	'(loc_os06g03830.1 : 247.0) no description available & (at1g64590 : 209.0) NAD(P)-binding Rossmann-fold superfamily protein; FUNCTIONS IN: oxidoreductase activity, binding, catalytic activity; INVOLVED IN: oxidation reduction, metabolic process; EXPRESSED IN: 20 plant structures; EXPRESSED DURING: 12 growth stages; CONTAINS InterPro DOMAIN/s: NAD(P)-binding domain (InterPro:IPR016040), Glucose/ri…
'26.28'	'misc.GDSL-motif lipase'	HORVU7Hr1G007590,6	8.89785	3.89156e-88	'(loc_os10g33690.1 : 222.0) no description available & (at5g62930 : 171.0) SGNH hydrolase-type esterase superfamily protein; FUNCTIONS IN: hydrolase activity, hydrolase activity, acting on ester bonds, carboxylesterase activity; INVOLVED IN: lipid metabolic process; LOCATED IN: cellular_component unknown; EXPRESSED IN: 23 plant structures; EXPRESSED DURING: 14 growth stages; CONTAINS InterPro DOM…
'26.28'	'misc.GDSL-motif lipase'	HORVU7Hr1G024250,1	9.52552	1.59159e-103	'(loc_os06g06260.1 : 407.0) no description available & (at5g45910 : 266.0) GDSL-like Lipase/Acylhydrolase superfamily protein; FUNCTIONS IN: hydrolase activity, acting on ester bonds, carboxylesterase activity; INVOLVED IN: lipid metabolic process; LOCATED IN: endomembrane system; EXPRESSED IN: 9 plant structures; EXPRESSED DURING: 4 anthesis, C globular stage, D bilateral stage; CONTAINS InterPr…
'26.3'	'misc.gluco-, galacto- and mannosidases'	HORVU2Hr1G023590,7	13.7166	0	'(loc_os07g46280.1 : 378.0) no description available & (at3g18070 : 291.0) beta glucosidase 43 (BGLU43); FUNCTIONS IN: cation binding, hydrolase activity, hydrolyzing O-glycosyl compounds, catalytic activity; INVOLVED IN: carbohydrate metabolic process; LOCATED IN: cellular_component unknown; CONTAINS InterPro DOMAIN/s: Glycoside hydrolase, family 1 (InterPro:IPR001360), Glycoside hydrolase, cata…
'26.3'	'misc.gluco-, galacto- and mannosidases'	HORVU2Hr1G023590,5	9.32193	8.93252e-127	'(loc_os07g46280.1 : 378.0) no description available & (at3g18070 : 291.0) beta glucosidase 43 (BGLU43); FUNCTIONS IN: cation binding, hydrolase activity, hydrolyzing O-glycosyl compounds, catalytic activity; INVOLVED IN: carbohydrate metabolic process; LOCATED IN: cellular_component unknown; CONTAINS InterPro DOMAIN/s: Glycoside hydrolase, family 1 (InterPro:IPR001360), Glycoside hydrolase, cata…
'26.3'	'misc.gluco-, galacto- and mannosidases'	HORVU2Hr1G023590,13	8.89482	3.10272e-64	'(loc_os07g46280.1 : 378.0) no description available & (at3g18070 : 291.0) beta glucosidase 43 (BGLU43); FUNCTIONS IN: cation binding, hydrolase activity, hydrolyzing O-glycosyl compounds, catalytic activity; INVOLVED IN: carbohydrate metabolic process; LOCATED IN: cellular_component unknown; CONTAINS InterPro DOMAIN/s: Glycoside hydrolase, family 1 (InterPro:IPR001360), Glycoside hydrolase, cata…
'26.7'	'misc.oxidases - copper, flavone etc'	HORVU2Hr1G121060,4	9.19476	1.14269e-111	'(loc_os04g57550.1 : 771.0) no description available & (at2g43020 : 525.0) polyamine oxidase 2 (PAO2); FUNCTIONS IN: primary amine oxidase activity, oxidoreductase activity; INVOLVED IN: oxidation reduction; LOCATED IN: cellular_component unknown; EXPRESSED IN: sperm cell, male gametophyte, pollen tube; EXPRESSED DURING: L mature pollen stage, M germinated pollen stage; CONTAINS InterPro DOMAIN/s…
'26.7'	'misc.oxidases - copper, flavone etc'	HORVU3Hr1G024150,1	9.43045	1.30654e-97	'(loc_os01g07920.1 : 288.0) no description available & (at3g28480 : 177.0) Oxoglutarate/iron-dependent oxygenase; FUNCTIONS IN: oxidoreductase activity, acting on paired donors, with incorporation or reduction of molecular oxygen, 2-oxoglutarate as one donor, and incorporation of one atom each of oxygen into both donors, oxidoreductase activity, oxidoreductase activity, acting on paired donors, w…
'26.7'	'misc.oxidases - copper, flavone etc'	HORVU7Hr1G013170,1	10.4388	9.21388e-166	'(loc_os01g16714.1 : 365.0) no description available & (at5g43890 : 265.0) Encodes a YUCCA-like putative flavin monooxygenase, the activation tagging mutant has increased level of IAA, increased auxin response and phenotype of auxin overproduction, rescues erecta mutant phenotype; YUCCA5 (YUC5); CONTAINS InterPro DOMAIN/s: Pyridine nucleotide-disulphide oxidoreductase, class-II (InterPro:IPR00010…
'26.7'	'misc.oxidases - copper, flavone etc'	HORVU2Hr1G122580,1	8.83131	2.53762e-124	'(loc_os08g04340.1 : 165.0) no description available & (at2g32300 : 107.0) Encodes a uclacyanin, a protein precursor that is closely related to precursors of stellacyanins and a blue copper protein from pea pods.; uclacyanin 1 (UCC1); FUNCTIONS IN: electron carrier activity, copper ion binding; LOCATED IN: anchored to membrane; EXPRESSED IN: 7 plant structures; EXPRESSED DURING: F mature embryo s…
'26.8'	'misc.nitrilases, *nitrile lyases, berberine bridge enzymes, reticuline oxidases, troponine reductases'	HORVU1Hr1G092680,2	8.97441	1.95301e-55	'(loc_os06g35550.1 : 367.0) no description available & (at4g20860 : 231.0) FAD-binding Berberine family protein; FUNCTIONS IN: electron carrier activity, oxidoreductase activity, FAD binding, catalytic activity; INVOLVED IN: response to cyclopentenone; LOCATED IN: endomembrane system; EXPRESSED IN: 10 plant structures; EXPRESSED DURING: LP.06 six leaves visible, LP.04 four leaves visible, 4 anthe…
'26.9'	'misc.glutathione S transferases'	HORVU2Hr1G124320,2	9.61839	2.91704e-68	'(loc_os07g05800.1 : 251.0) no description available & (at1g78380 : 206.0) Encodes a glutathione transferase that is a member of Tau GST gene family. Expression is induced by drought stress, oxidative stress, and high doses of auxin and cytokinin. naming convention according to Wagner et al. (2002) The expression of this gene is upregulated by herbicide safeners such as benoxacor and fenclorim.; …
'27.1'	'RNA.processing'	HORVU7Hr1G063970,12	10.0701	2.28776e-133	'(loc_os08g22354.2 : 432.0) no description available & (at2g23350 : 330.0) polyadenylate-binding protein, putative / PABP, putative.Member of the Class II family of PABP proteins. Highly and ubiquitously expressed.; poly(A) binding protein 4 (PAB4); FUNCTIONS IN: RNA binding, translation initiation factor activity; INVOLVED IN: response to cadmium ion; EXPRESSED IN: 24 plant structures; EXPRESSED…
'27.1'	'RNA.processing'	HORVU7Hr1G120070,7	4.85798	6.30954e-06	'(loc_os06g51350.1 : 555.0) no description available & (at5g20040 : 435.0) Encodes tRNA isopentenyltransferase AtIPT9.; isopentenyltransferase 9 (IPT9); FUNCTIONS IN: tRNA dimethylallyltransferase activity, ATP binding; INVOLVED IN: tRNA processing, cytokinin biosynthetic process; EXPRESSED IN: 19 plant structures; EXPRESSED DURING: 13 growth stages; CONTAINS InterPro DOMAIN/s: tRNA delta(2)-isop…
'27.1.1'	'RNA.processing.splicing'	HORVU1Hr1G087660,4	9.44915	7.946e-78	'(loc_os05g48960.3 : 380.0) no description available & (at5g42820 : 341.0) U2 auxiliary factor small subunit. The atU2AF35b protein and its homolog, atU2AF35a, contain most of the conserved domains of hsU2AF35, including the psiRRM, one RS domain, two zinc fingers, and the two regions for interacting with U2AF large subunit. Both proteins lack the stretch of glycines present in human U2AF35. The …
'27.1.19'	'RNA.processing.ribonucleases'	HORVU1Hr1G093560,1	9.03617	8.61976e-44	'(loc_os09g36680.1 : 402.0) no description available & (at1g14220 : 164.0) Ribonuclease T2 family protein; FUNCTIONS IN: ribonuclease T2 activity, endoribonuclease activity, RNA binding; INVOLVED IN: N-terminal protein myristoylation; LOCATED IN: endomembrane system; EXPRESSED IN: sperm cell, root, egg cell; CONTAINS InterPro DOMAIN/s: Ribonuclease T2 (InterPro:IPR001568), Ribonuclease T2, active…
'27.1.19'	'RNA.processing.ribonucleases'	HORVU7Hr1G082860,4	9.56224	3.65672e-84	'(loc_os06g25250.1 : 395.0) no description available & (at4g15417 : 186.0) RNAse II-like 1 (RTL1); FUNCTIONS IN: RNA binding, ribonuclease III activity; INVOLVED IN: RNA processing; LOCATED IN: cellular_component unknown; EXPRESSED IN: root; CONTAINS InterPro DOMAIN/s: Ribonuclease III (InterPro:IPR000999); BEST Arabidopsis thaliana protein match is: RNAse THREE-like protein 2 (TAIR:AT3G20420.1);…
'27.1.19'	'RNA.processing.ribonucleases'	HORVU2Hr1G046530,3	8.81698	6.91842e-14	'(loc_os07g33240.1 : 217.0) no description available & (at3g20390 : 199.0) endoribonuclease L-PSP family protein; FUNCTIONS IN: endoribonuclease activity; INVOLVED IN: response to cadmium ion; LOCATED IN: thylakoid, mitochondrion, chloroplast, plastid, vacuole; EXPRESSED IN: 27 plant structures; EXPRESSED DURING: 16 growth stages; CONTAINS InterPro DOMAIN/s: Endoribonuclease L-PSP (InterPro:IPR00…
'27.2'	'RNA.transcription'	HORVU4Hr1G016350,2	10.3197	3.92874e-66	'(loc_os12g09280.1 : 178.0) no description available & (at2g29540 : 134.0) RNA polymerase I(A) and III(C) 14 kDa subunit; RNApolymerase 14 kDa subunit (RPC14); FUNCTIONS IN: DNA-directed RNA polymerase activity, DNA binding; INVOLVED IN: tRNA transcription; LOCATED IN: DNA-directed RNA polymerase III complex; EXPRESSED IN: 22 plant structures; EXPRESSED DURING: 13 growth stages; CONTAINS InterPro…
'27.3.11'	'RNA.regulation of transcription.C2H2 zinc finger family'	HORVU5Hr1G059900,1	8.74819	1.34435e-31	'(loc_os09g21710.1 : 228.0) no description available & (at3g28210 : 140.0) Encodes a putative zinc finger protein (PMZ).; PMZ; FUNCTIONS IN: zinc ion binding; INVOLVED IN: response to abscisic acid stimulus, response to chitin; LOCATED IN: cellular_component unknown; EXPRESSED IN: 12 plant structures; EXPRESSED DURING: 10 growth stages; CONTAINS InterPro DOMAIN/s: Zinc finger, AN1-type (InterPro:…
'27.3.16'	'RNA.regulation of transcription.CCAAT box binding factor family, HAP5'	HORVU7Hr1G048760,5	9.97871	1.33163e-53	'(loc_os09g30310.1 : 196.0) no description available & (at1g08970 : 169.0) heme activated protein (HAP5c); "nuclear factor Y, subunit C9" (NF-YC9); CONTAINS InterPro DOMAIN/s: Transcription factor CBF/NF-Y/archaeal histone (InterPro:IPR003958), Histone-fold (InterPro:IPR009072); BEST Arabidopsis thaliana protein match is: nuclear factor Y, subunit C3 (TAIR:AT1G54830.3); Has 35333 Blast hits to 34…
'27.3.20'	'RNA.regulation of transcription.G2-like transcription factor family, GARP'	HORVU7Hr1G107680,3	8.88874	9.07946e-52	'(loc_os06g45890.1 : 164.0) no description available & (at1g14600 : 82.0) Homeodomain-like superfamily protein; CONTAINS InterPro DOMAIN/s: Myb, DNA-binding (InterPro:IPR014778), Homeodomain-like (InterPro:IPR009057), Homeodomain-related (InterPro:IPR012287), HTH transcriptional regulator, Myb-type, DNA-binding (InterPro:IPR017930), Myb-like DNA-binding domain, SHAQKYF class (InterPro:IPR006447);…
'27.3.22'	'RNA.regulation of transcription.HB,Homeobox transcription factor family'	HORVU2Hr1G036680,1	9.48382	5.84482e-35	'(loc_os07g39320.1 : 191.0) no description available & (at4g36740 : 131.0) Encodes a homeodomain leucine zipper class I (HD-Zip I) protein.; homeobox protein 40 (HB40); FUNCTIONS IN: DNA binding, sequence-specific DNA binding transcription factor activity; INVOLVED IN: response to auxin stimulus, regulation of transcription, DNA-dependent; LOCATED IN: nucleus; EXPRESSED IN: ovule, fruit, root, fl…
'27.3.22'	'RNA.regulation of transcription.HB,Homeobox transcription factor family'	HORVU2Hr1G092710,8	9.08481	4.47076e-63	'(loc_os04g45810.1 : 250.0) no description available & (at2g46680 : 119.0) encodes a putative transcription factor that contains a homeodomain closely linked to a leucine zipper motif. Transcript is detected in all tissues examined. Is transcriptionally regulated in an ABA-dependent manner and may act in a signal transduction pathway which mediates a drought response.; homeobox 7 (HB-7); FUNCTION…
'27.3.27'	'RNA.regulation of transcription.NAC domain transcription factor family'	HORVU3Hr1G014100,1	10.8242	4.87252e-185	'(loc_os01g29840.1 : 229.0) no description available & (at5g61430 : 221.0) NAC domain containing protein 100 (NAC100); FUNCTIONS IN: sequence-specific DNA binding transcription factor activity; INVOLVED IN: multicellular organismal development, regulation of transcription; LOCATED IN: cellular_component unknown; EXPRESSED IN: 9 plant structures; EXPRESSED DURING: LP.04 four leaves visible, 4 anth…
'27.3.27'	'RNA.regulation of transcription.NAC domain transcription factor family'	HORVU5Hr1G077010,3	8.98299	1.85269e-29	'(loc_os09g33490.1 : 136.0) no description available & (at2g33480 : 109.0) NAC domain containing protein 41 (NAC041); FUNCTIONS IN: sequence-specific DNA binding transcription factor activity; INVOLVED IN: multicellular organismal development, regulation of transcription; EXPRESSED IN: 22 plant structures; EXPRESSED DURING: 13 growth stages; CONTAINS InterPro DOMAIN/s: No apical meristem (NAM) pr…
'27.3.32'	'RNA.regulation of transcription.WRKY domain transcription factor family'	HORVU5Hr1G094050,5	9.46352	7.32106e-106	'(loc_os03g53050.2 : 500.0) no description available & (at2g30590 : 191.0) Encodes WRKY DNA-binding protein 21 (WRKY21).; WRKY DNA-binding protein 21 (WRKY21); FUNCTIONS IN: calmodulin binding, sequence-specific DNA binding transcription factor activity; INVOLVED IN: regulation of transcription, DNA-dependent, regulation of transcription; LOCATED IN: nucleus; EXPRESSED IN: 22 plant structures; EX…
'27.3.32'	'RNA.regulation of transcription.WRKY domain transcription factor family'	HORVU5Hr1G096420,10	9.03342	5.44012e-53	'(loc_os03g55080.1 : 241.0) no description available & (at1g69310 : 171.0) member of WRKY Transcription Factor; Group II-c; WRKY DNA-binding protein 57 (WRKY57); CONTAINS InterPro DOMAIN/s: DNA-binding WRKY (InterPro:IPR003657); BEST Arabidopsis thaliana protein match is: WRKY DNA-binding protein 48 (TAIR:AT5G49520.1); Has 35333 Blast hits to 34131 proteins in 2444 species: Archae - 798; Bacteria…
'27.3.35'	'RNA.regulation of transcription.bZIP transcription factor family'	HORVU7Hr1G093580,7	9.57175	1.90094e-63	'(loc_os06g41770.1 : 222.0) no description available & (at1g42990 : 92.4) AtbZIP60 consists of a bZIP DNA binding domain followed by a putative transmembrane domain. GFP fusions containing the first 260 amino acids (AtbZIP60deltaC) are nuclear-localized. AtbZIP60 is upregulated by the addition of tunicamycin (ER stress response inductor), DTT (inhibitor of disulfide bond formation) and azetin-2-c…
'27.3.52'	'RNA.regulation of transcription.Global transcription factor group'	HORVU2Hr1G010380,6	9.09276	3.53702e-161	'(q7x923|spt16_orysa : 1552.0) FACT complex subunit SPT16 (Facilitates chromatin transcription complex subunit SPT16) - Oryza sativa (Rice) & (loc_os04g25550.1 : 1552.0) no description available & (at4g10710 : 1253.0) encodes a component of the FAcilitates Chromatin Transcription (FACT) complex, SPT16.Along with SSRP1 binds to the promoter of FLC.; global transcription factor C (SPT16); INVOLVED …
'27.3.58'	'RNA.regulation of transcription.LUG'	HORVU6Hr1G089700,9	8.77808	1.01858e-81	'(loc_os04g43130.1 : 171.0) no description available & (at2g32700 : 138.0) Encodes a WD40 repeat and LUFS domain containing protein that is similar to LUG. Interacts physically with SEUSS and likely functions as part of a repressor complex that represses AG.; LEUNIG_homolog (LUH); FUNCTIONS IN: molecular_function unknown; INVOLVED IN: flower development, negative regulation of transcription, embr…
'27.3.59'	'RNA.regulation of transcription.Methyl binding domain proteins'	HORVU5Hr1G092570,2	9.64386	5.45206e-143	'(loc_os12g42550.1 : 125.0) no description available & (at3g15790 : 96.3) Protein containing methyl-CpG-binding domain.Has sequence similarity to human MBD proteins.; methyl-CPG-binding domain 11 (MBD11); FUNCTIONS IN: methyl-CpG binding, DNA binding; INVOLVED IN: biological_process unknown; LOCATED IN: nucleus; EXPRESSED IN: 22 plant structures; EXPRESSED DURING: 13 growth stages; CONTAINS Inter…
'27.3.6'	'RNA.regulation of transcription.bHLH,Basic Helix-Loop-Helix family'	HORVU7Hr1G026560,11	9.633	2.20142e-74	'(loc_os06g06900.1 : 265.0) no description available & (at4g36930 : 114.0) Encodes a transcription factor of the bHLH protein family. Mutants have abnormal, unfused carpels and reduced seed dormancy.; SPATULA (SPT); CONTAINS InterPro DOMAIN/s: Helix-loop-helix DNA-binding domain (InterPro:IPR001092), Helix-loop-helix DNA-binding (InterPro:IPR011598); BEST Arabidopsis thaliana protein match is: ba…
'27.3.66'	'RNA.regulation of transcription.Psudo ARR transcription factor family'	HORVU4Hr1G021000,7	9.783	9.60618e-141	'(loc_os11g05930.3 : 748.0) no description available & (q689g6|prr95_orysa : 152.0) Two-component response regulator-like PRR95 (Pseudo-response regulator 95) (OsPRR95) - Oryza sativa (Rice) & (at5g02810 : 102.0) PRR7 and PRR9 are partially redundant essential components of a temperature-sensitive circadian system. CCA1 and LHY had a positive effect on PRR7 expression levels. Acts as transcriptio…
'27.3.67'	'RNA.regulation of transcription.putative transcription regulator'	HORVU0Hr1G017760,3	9.48382	6.6829e-21	'(loc_os02g57840.2 : 153.0) no description available & (at5g23750 : 126.0) Remorin family protein; CONTAINS InterPro DOMAIN/s: Remorin, C-terminal (InterPro:IPR005516), Remorin, N-terminal (InterPro:IPR005518); BEST Arabidopsis thaliana protein match is: Remorin family protein (TAIR:AT3G48940.1); Has 35333 Blast hits to 34131 proteins in 2444 species: Archae - 798; Bacteria - 22429; Metazoa - 974…
'27.3.67'	'RNA.regulation of transcription.putative transcription regulator'	HORVU2Hr1G025710,9	9.21675	2.3652e-56	'(loc_os07g44820.1 : 431.0) no description available & (at5g05140 : 104.0) Transcription elongation factor (TFIIS) family protein; FUNCTIONS IN: transcription regulator activity, DNA binding; INVOLVED IN: transcription; LOCATED IN: nucleus; EXPRESSED IN: 24 plant structures; EXPRESSED DURING: 15 growth stages; CONTAINS InterPro DOMAIN/s: Transcription factor IIS, N-terminal (InterPro:IPR017923), …
'27.3.67'	'RNA.regulation of transcription.putative transcription regulator'	HORVU2Hr1G091680,2	9.21189	3.06284e-50	'(loc_os04g45070.1 : 153.0) no description available & (p93788|remo_soltu : 106.0) Remorin (pp34) - Solanum tuberosum (Potato) & (at5g23750 : 90.1) Remorin family protein; CONTAINS InterPro DOMAIN/s: Remorin, C-terminal (InterPro:IPR005516), Remorin, N-terminal (InterPro:IPR005518); BEST Arabidopsis thaliana protein match is: Remorin family protein (TAIR:AT3G48940.1); Has 35333 Blast hits to 3413…
'27.3.67'	'RNA.regulation of transcription.putative transcription regulator'	HORVU2Hr1G105390,11	9.18239	6.13208e-72	'(loc_os12g38440.3 : 263.0) no description available & (at1g15910 : 101.0) XH/XS domain-containing protein; CONTAINS InterPro DOMAIN/s: Domain of unknown function XS (InterPro:IPR005380), Domain of unknown function XH (InterPro:IPR005379), Domain of unknown function, putative Zinc finger, XS/XH (InterPro:IPR005381); BEST Arabidopsis thaliana protein match is: XH/XS domain-containing protein (TAIR…
'27.3.67'	'RNA.regulation of transcription.putative transcription regulator'	HORVU4Hr1G037030,1	10.0084	6.46692e-245	'(loc_os03g26630.2 : 833.0) no description available & (at4g39680 : 338.0) SAP domain-containing protein; FUNCTIONS IN: DNA binding, nucleic acid binding; INVOLVED IN: biological_process unknown; LOCATED IN: cytosol, nucleus; EXPRESSED IN: 26 plant structures; EXPRESSED DURING: 14 growth stages; CONTAINS InterPro DOMAIN/s: DNA-binding SAP (InterPro:IPR003034); Has 10985 Blast hits to 6880 protein…
'27.3.99'	'RNA.regulation of transcription.unclassified'	HORVU7Hr1G000480,4	9.22159	1.98107e-22	'(loc_os06g01370.1 : 123.0) no description available & (at1g23750 : 112.0) Nucleic acid-binding, OB-fold-like protein; CONTAINS InterPro DOMAIN/s: Nucleic acid-binding, OB-fold-like (InterPro:IPR016027), Nucleic acid-binding, OB-fold (InterPro:IPR012340); BEST Arabidopsis thaliana protein match is: Nucleic acid-binding, OB-fold-like protein (TAIR:AT1G10590.2); Has 249 Blast hits to 249 proteins i…
'27.3.99'	'RNA.regulation of transcription.unclassified'	HORVU3Hr1G086080,10	8.73132	9.80138e-23	'(loc_os01g62620.1 : 272.0) no description available & (at3g09320 : 210.0) DHHC-type zinc finger family protein; FUNCTIONS IN: zinc ion binding; INVOLVED IN: biological_process unknown; LOCATED IN: endomembrane system; EXPRESSED IN: 24 plant structures; EXPRESSED DURING: 15 growth stages; CONTAINS InterPro DOMAIN/s: Zinc finger, DHHC-type (InterPro:IPR001594); BEST Arabidopsis thaliana protein ma…
'27.3.99'	'RNA.regulation of transcription.unclassified'	HORVU5Hr1G016350,10	8.85175	5.33764e-97	'(loc_os12g40490.1 : 142.0) no description available & (at4g36860 : 122.0) LIM domain-containing protein; FUNCTIONS IN: zinc ion binding; LOCATED IN: plasma membrane; EXPRESSED IN: 24 plant structures; EXPRESSED DURING: 13 growth stages; CONTAINS InterPro DOMAIN/s: Zinc finger, LIM-type (InterPro:IPR001781), Ubiquitin interacting motif (InterPro:IPR003903), Protein of unknown function DUF3633 (In…
'27.4'	'RNA.RNA binding'	HORVU3Hr1G057270,20	9.10329	5.32594e-133	'(loc_os01g13470.1 : 438.0) no description available & (at5g15270 : 114.0) RNA-binding KH domain-containing protein; FUNCTIONS IN: RNA binding, nucleic acid binding; INVOLVED IN: biological_process unknown; LOCATED IN: cellular_component unknown; CONTAINS InterPro DOMAIN/s: K Homology, type 1, subgroup (InterPro:IPR018111), K Homology (InterPro:IPR004087), K Homology, type 1 (InterPro:IPR004088);…
'27.4'	'RNA.RNA binding'	HORVU4Hr1G049680,7	9.37721	1.8439e-40	'(loc_os03g25970.2 : 626.0) no description available & (at5g15270 : 389.0) RNA-binding KH domain-containing protein; FUNCTIONS IN: RNA binding, nucleic acid binding; INVOLVED IN: biological_process unknown; LOCATED IN: cellular_component unknown; CONTAINS InterPro DOMAIN/s: K Homology, type 1, subgroup (InterPro:IPR018111), K Homology (InterPro:IPR004087), K Homology, type 1 (InterPro:IPR004088);…
'28.1'	'DNA.synthesis/chromatin structure'	HORVU4Hr1G012000,5	8.89785	1.2277e-93	'(loc_os03g42710.1 : 559.0) no description available & (at4g34380 : 389.0) Transducin/WD40 repeat-like superfamily protein; CONTAINS InterPro DOMAIN/s: WD40 repeat 2 (InterPro:IPR019782), WD40 repeat-like-containing domain (InterPro:IPR011046), WD40-repeat-containing domain (InterPro:IPR017986), WD40/YVTN repeat-like-containing domain (InterPro:IPR015943), WD40 repeat (InterPro:IPR001680), WD40 r…
'28.1'	'DNA.synthesis/chromatin structure'	HORVU4Hr1G012010,1	9.3837	3.73372e-52	'(loc_os03g42710.1 : 237.0) no description available & (at1g49450 : 162.0) Transducin/WD40 repeat-like superfamily protein; CONTAINS InterPro DOMAIN/s: WD40 repeat 2 (InterPro:IPR019782), WD40 repeat-like-containing domain (InterPro:IPR011046), WD40-repeat-containing domain (InterPro:IPR017986), WD40/YVTN repeat-like-containing domain (InterPro:IPR015943), WD40 repeat (InterPro:IPR001680), WD40 r…
'28.1.3.2.1'	'DNA.synthesis/chromatin structure.histone.core.H2A'	HORVU7Hr1G100120,13	10.2264	4.221e-48	'(p02277|h2a3_wheat : 162.0) Histone H2A.2.2 - Triticum aestivum (Wheat) & (loc_os05g02300.1 : 159.0) no description available & (at5g02560 : 153.0) Encodes HTA12, a histone H2A protein.; histone H2A 12 (HTA12); FUNCTIONS IN: DNA binding; INVOLVED IN: nucleosome assembly; LOCATED IN: nucleus, nucleosome; EXPRESSED IN: 22 plant structures; EXPRESSED DURING: 13 growth stages; CONTAINS InterPro DOMA…
'28.1.3.2.1'	'DNA.synthesis/chromatin structure.histone.core.H2A'	HORVU6Hr1G029220,3	8.85798	1.85269e-29	'(q43213|h2a5_wheat : 175.0) Protein H2A.5 (wcH2A-2) - Triticum aestivum (Wheat) & (loc_os03g17100.1 : 157.0) no description available & (at5g02560 : 145.0) Encodes HTA12, a histone H2A protein.; histone H2A 12 (HTA12); FUNCTIONS IN: DNA binding; INVOLVED IN: nucleosome assembly; LOCATED IN: nucleus, nucleosome; EXPRESSED IN: 22 plant structures; EXPRESSED DURING: 13 growth stages; CONTAINS Inter…
'28.1.3.2.3'	'DNA.synthesis/chromatin structure.histone.core.H3'	HORVU1Hr1G022400,3	10.1383	1.76512e-44	'(at5g65360 : 254.0) Histone superfamily protein; FUNCTIONS IN: DNA binding; INVOLVED IN: nucleosome assembly; LOCATED IN: chloroplast, nucleosome; EXPRESSED IN: 23 plant structures; EXPRESSED DURING: 14 growth stages; CONTAINS InterPro DOMAIN/s: Histone H3 (InterPro:IPR000164), Histone-fold (InterPro:IPR009072), Histone core (InterPro:IPR007125); BEST Arabidopsis thaliana protein match is: Histo…
'28.1.3.2.4'	'DNA.synthesis/chromatin structure.histone.core.H4'	HORVU1Hr1G020040,2	8.86419	5.18526e-16	'(at5g59970 : 162.0) Histone superfamily protein; FUNCTIONS IN: DNA binding; INVOLVED IN: nucleosome assembly; LOCATED IN: vacuole; CONTAINS InterPro DOMAIN/s: Histone H4, conserved site (InterPro:IPR019809), Histone-fold (InterPro:IPR009072), Histone core (InterPro:IPR007125), Histone H4 (InterPro:IPR001951); BEST Arabidopsis thaliana protein match is: Histone superfamily protein (TAIR:AT5G59690…
'28.1.3.2.4'	'DNA.synthesis/chromatin structure.histone.core.H4'	HORVU1Hr1G020060,1	8.86419	5.18526e-16	'(at5g59970 : 162.0) Histone superfamily protein; FUNCTIONS IN: DNA binding; INVOLVED IN: nucleosome assembly; LOCATED IN: vacuole; CONTAINS InterPro DOMAIN/s: Histone H4, conserved site (InterPro:IPR019809), Histone-fold (InterPro:IPR009072), Histone core (InterPro:IPR007125), Histone H4 (InterPro:IPR001951); BEST Arabidopsis thaliana protein match is: Histone superfamily protein (TAIR:AT5G59690…
'28.99'	'DNA.unspecified'	HORVU5Hr1G020430,5	10.2574	6.5911e-201	'(loc_os10g26730.1 : 685.0) no description available & (at5g07710 : 428.0) Polynucleotidyl transferase, ribonuclease H-like superfamily protein; FUNCTIONS IN: exonuclease activity, nucleic acid binding; INVOLVED IN: biological_process unknown; LOCATED IN: intracellular; EXPRESSED IN: 23 plant structures; EXPRESSED DURING: 13 growth stages; CONTAINS InterPro DOMAIN/s: Exonuclease (InterPro:IPR0060…
'29.1'	'protein.aa activation'	HORVU5Hr1G019600,3	8.98868	3.68358e-33	'(at5g03240 : 277.0) encodes ubiquitin that is attached to proteins destined for degradation. UBQ3 is most homologous with UBQ4, and is expressed in higher levels in vegetative tissue but lower levels in flowers than UBQ4. UBQ3 encodes different number of ubiquitins in different ecotypes. UBQ3 transcript level is modulated by UV-B and light/dark treatments.; polyubiquitin 3 (UBQ3); INVOLVED IN: p…
'29.1.19'	'protein.aa activation.arginine-tRNA ligase'	HORVU1Hr1G073500,1	10.9513	0	'(loc_os05g37434.1 : 767.0) no description available & (at3g11240 : 431.0) Encodes an arginyl-tRNA:protein arginyltransferase (ATE2), a component of the N-end rule pathway that targets protein degradation through the identity of the amino-terminal residue of specific protein substrates. Arabidopsis contains two ATE genes: At5g05700/ATE1, At3g11240/ATE2. Another component of the N-end rule pathway…
'29.2.1.1.3.2.1712'	'protein.synthesis.ribosomal protein.prokaryotic.unknown organellar.50S subunit.L7/L12'	HORVU2Hr1G003460,5	9.61102	2.39918e-23	'(loc_os08g33540.2 : 156.0) no description available & (at1g68660 : 141.0) Ribosomal protein L12/ ATP-dependent Clp protease adaptor protein ClpS family protein; FUNCTIONS IN: molecular_function unknown; INVOLVED IN: protein catabolic process; EXPRESSED IN: 23 plant structures; EXPRESSED DURING: 14 growth stages; CONTAINS InterPro DOMAIN/s: Adaptor protein ClpS, core (InterPro:IPR003769), Ribosom…
'29.2.1.2.1.10'	'protein.synthesis.ribosomal protein.eukaryotic.40S subunit.S10'	HORVU0Hr1G004700,2	11.4522	4.55858e-166	'(q9ayp4|rs10_orysa : 161.0) 40S ribosomal protein S10 - Oryza sativa (Rice) & (loc_os04g35090.1 : 161.0) no description available & (at5g52650 : 145.0) RNA binding Plectin/S10 domain-containing protein; FUNCTIONS IN: structural constituent of ribosome; INVOLVED IN: translation; LOCATED IN: cytosolic small ribosomal subunit, cytosolic ribosome, cell wall, membrane; EXPRESSED IN: 22 plant structur…
'29.2.1.2.1.11'	'protein.synthesis.ribosomal protein.eukaryotic.40S subunit.S11'	HORVU2Hr1G099230,6	11.1434	7.17846e-183	'(loc_os08g10608.1 : 307.0) no description available & (p25460|rs11_maize : 303.0) 40S ribosomal protein S11 - Zea mays (Maize) & (at5g23740 : 289.0) Encodes a putative ribosomal protein S11 (RPS11-beta).; ribosomal protein S11-beta (RPS11-BETA); FUNCTIONS IN: structural constituent of ribosome; INVOLVED IN: translation; LOCATED IN: cytosolic small ribosomal subunit, membrane; EXPRESSED IN: 22 pl…
'29.2.1.2.1.53'	'protein.synthesis.ribosomal protein.eukaryotic.40S subunit.S3A'	HORVU4Hr1G070370,4	9.07948	3.7447e-29	'(loc_os12g21798.1 : 338.0) no description available & (p49397|rs3a_orysa : 333.0) 40S ribosomal protein S3a (CYC07 protein) - Oryza sativa (Rice) & (at4g34670 : 302.0) Ribosomal protein S3Ae; FUNCTIONS IN: structural constituent of ribosome; INVOLVED IN: translation; LOCATED IN: in 6 components; EXPRESSED IN: 23 plant structures; EXPRESSED DURING: 13 growth stages; CONTAINS InterPro DOMAIN/s: Ri…
'29.2.1.2.1.8'	'protein.synthesis.ribosomal protein.eukaryotic.40S subunit.S8'	HORVU2Hr1G067370,7	11.4419	1.83595e-198	'(p49199|rs8_orysa : 339.0) 40S ribosomal protein S8 - Oryza sativa (Rice) & (loc_os02g28810.1 : 339.0) no description available & (at5g20290 : 328.0) Ribosomal protein S8e family protein; FUNCTIONS IN: structural constituent of ribosome; INVOLVED IN: translation, ribosome biogenesis; LOCATED IN: in 8 components; EXPRESSED IN: 26 plant structures; EXPRESSED DURING: 14 growth stages; CONTAINS Inte…
'29.2.1.2.2.11'	'protein.synthesis.ribosomal protein.eukaryotic.60S subunit.L11'	HORVU1Hr1G028820,4	9.56605	2.3878e-34	'(loc_os02g14059.1 : 309.0) no description available & (o22540|rl11_orysa : 308.0) 60S ribosomal protein L11 - Oryza sativa (Rice) & (at5g45775 : 301.0) Ribosomal L5P family protein; FUNCTIONS IN: structural constituent of ribosome; INVOLVED IN: translation; LOCATED IN: cytosolic large ribosomal subunit, vacuole; EXPRESSED IN: male gametophyte, leaf; CONTAINS InterPro DOMAIN/s: Ribosomal protein …
'29.2.1.2.2.14'	'protein.synthesis.ribosomal protein.eukaryotic.60S subunit.L14'	HORVU2Hr1G089070,2	9.20212	4.55662e-19	'(loc_os04g43540.1 : 208.0) no description available & (at2g20450 : 181.0) Ribosomal protein L14; FUNCTIONS IN: structural constituent of ribosome; INVOLVED IN: translation, ribosome biogenesis; LOCATED IN: ribosome, cytosolic large ribosomal subunit, endoplasmic reticulum, vacuole; EXPRESSED IN: 23 plant structures; EXPRESSED DURING: 13 growth stages; CONTAINS InterPro DOMAIN/s: Ribosomal protei…
'29.2.1.2.2.14'	'protein.synthesis.ribosomal protein.eukaryotic.60S subunit.L14'	HORVU2Hr1G089090,1	9.20212	4.55662e-19	'(loc_os04g43540.1 : 208.0) no description available & (at2g20450 : 181.0) Ribosomal protein L14; FUNCTIONS IN: structural constituent of ribosome; INVOLVED IN: translation, ribosome biogenesis; LOCATED IN: ribosome, cytosolic large ribosomal subunit, endoplasmic reticulum, vacuole; EXPRESSED IN: 23 plant structures; EXPRESSED DURING: 13 growth stages; CONTAINS InterPro DOMAIN/s: Ribosomal protei…
'29.2.1.2.2.537'	'protein.synthesis.ribosomal protein.eukaryotic.60S subunit.L37A'	HORVU3Hr1G062590,2	9.89026	5.51828e-20	'(loc_os01g48770.2 : 152.0) no description available & (q5qm99|rl37a_orysa : 150.0) 60S ribosomal protein L37a - Oryza sativa (Rice) & (at3g60245 : 143.0) Zinc-binding ribosomal protein family protein; FUNCTIONS IN: structural constituent of ribosome; INVOLVED IN: translation, ribosome biogenesis; LOCATED IN: ribosome, cytosolic large ribosomal subunit; EXPRESSED IN: 25 plant structures; EXPRESSE…
'29.2.4'	'protein.synthesis.elongation'	HORVU0Hr1G017020,2	10.2264	2.80828e-106	'(p34823|ef1a2_dauca : 312.0) Elongation factor 1-alpha (EF-1-alpha) - Daucus carota (Carrot) & (at5g60390 : 309.0) GTP binding Elongation factor Tu family protein; FUNCTIONS IN: calmodulin binding, translation elongation factor activity; INVOLVED IN: translational elongation; LOCATED IN: mitochondrion, nucleus, cytoplasm; EXPRESSED IN: cotyledon, male gametophyte, guard cell, pollen tube, seed; …
'29.3.1'	'protein.targeting.nucleus'	HORVU3Hr1G034750,8	9.04439	6.07404e-94	'(q71vm4|ima1a_orysa : 552.0) Importin alpha-1a subunit - Oryza sativa (Rice) & (loc_os01g14950.1 : 552.0) no description available & (at3g06720 : 495.0) Encodes importin alpha involved in nuclear import.; AT-IMP; FUNCTIONS IN: protein transporter activity, binding; INVOLVED IN: intracellular protein transport, protein import into nucleus; LOCATED IN: cytosol, nuclear envelope, nucleolus, cell wa…
'29.3.4.2'	'protein.targeting.secretory pathway.golgi'	HORVU6Hr1G091720,8	9.43879	5.51828e-20	'(loc_os02g57510.2 : 159.0) no description available & (at3g58170 : 145.0) Encodes a Bet1/Sft1-like SNARE protein which fully suppresses the temperature-sensitive growth defect in <i>sft1-1</i> yeast cells; however, it cannot support the deletion of the yeast BET1 gene (<i>bet1&#916;</i>).; BET1P/SFT1P-like protein 14A (BS14A); FUNCTIONS IN: protein transporter activity, SNAP receptor activity; I…
'29.3.4.3'	'protein.targeting.secretory pathway.vacuole'	HORVU2Hr1G092090,1	13.1105	0	'(loc_os04g45470.1 : 186.0) no description available & (p49045|vpe_soybn : 150.0) Vacuolar-processing enzyme precursor (EC 3.4.22.-) (VPE) - Glycine max (Soybean) & (at4g32940 : 133.0) Encodes a vacuolar processing enzyme belonging to a novel group of cysteine proteinases that is expressed in vegetative organs and is upregulated in association with various types of cell death and under stressed c…
'29.3.5'	'protein.targeting.peroxisomes'	HORVU0Hr1G001510,5	8.92778	1.74089e-25	'(loc_os05g50220.1 : 235.0) no description available & (at5g62810 : 91.3) mutant has a defect in the intracellular transport of thiolase from the cytosol to glyoxysomes (formerly known as ped2); peroxin 14 (PEX14); FUNCTIONS IN: protein transporter activity, protein binding; INVOLVED IN: peroxisome organization, protein targeting to peroxisome; LOCATED IN: cytosol, peroxisome, plasma membrane; EX…
'29.4'	'protein.postranslational modification'	HORVU5Hr1G051850,5	9.49586	1.61266e-54	'(loc_os09g07510.2 : 907.0) no description available & (at3g25800 : 884.0) one of three genes encoding the protein phosphatase 2A regulatory subunit; protein phosphatase 2A subunit A2 (PP2AA2); FUNCTIONS IN: protein phosphatase type 2A regulator activity; INVOLVED IN: response to cadmium ion, regulation of phosphorylation; LOCATED IN: plasma membrane; EXPRESSED IN: 25 plant structures; EXPRESSED …
'29.4'	'protein.postranslational modification'	HORVU5Hr1G078370,3	8.92184	2.39468e-23	'(loc_os09g33930.3 : 304.0) no description available & (at3g59380 : 203.0) Encodes the alpha-subunit shared between protein farnesyltransferase and protein geranylgeranyltransferase-I. Involved in protein prenylation: covalent attachment of the C-15 isoprene farnesyl or the C-20 isoprene geranylgeranyl groups to the C-terminal end of some proteins. Involved in shoot and flower meristem homeostasi…
'29.4'	'protein.postranslational modification'	HORVU2Hr1G063420,6	10.0084	4.11054e-92	'(loc_os07g02350.1 : 631.0) no description available & (p28523|csk2a_maize : 623.0) Casein kinase II subunit alpha (EC 2.7.11.1) (CK II) (CK2-alpha) - Zea mays (Maize) & (at3g50000 : 606.0) casein kinase II catalytic subunit alpha; "casein kinase II, alpha chain 2" (CKA2); FUNCTIONS IN: protein binding, kinase activity; INVOLVED IN: protein amino acid phosphorylation; LOCATED IN: plasma membrane;…
'29.4'	'protein.postranslational modification'	HORVU3Hr1G066800,11	8.78136	7.5808e-87	'(loc_os01g51200.2 : 524.0) no description available & (at4g26100 : 495.0) Encodes a member of the casein kinase 1 protein family that is expressed in punctate particles at the cell periphery suggesting possible plasmodesmatal localization.; casein kinase 1 (CK1); FUNCTIONS IN: protein serine/threonine kinase activity, protein kinase activity, kinase activity, ATP binding; INVOLVED IN: protein am…
'29.4'	'protein.postranslational modification'	HORVU5Hr1G046830,3	8.84862	4.78056e-56	'(loc_os12g02200.1 : 699.0) no description available & (at5g07070 : 500.0) Encodes CBL-interacting protein kinase 2 (CIPK2).; CBL-interacting protein kinase 2 (CIPK2); FUNCTIONS IN: protein serine/threonine kinase activity, protein kinase activity, kinase activity, ATP binding; INVOLVED IN: signal transduction, protein amino acid phosphorylation; LOCATED IN: cellular_component unknown; EXPRESSED …
'29.4'	'protein.postranslational modification'	HORVU6Hr1G084460,24	8.79442	1.52817e-29	'(at1g79640 : 676.0) Protein kinase superfamily protein; FUNCTIONS IN: protein serine/threonine kinase activity, protein kinase activity, kinase activity, ATP binding; INVOLVED IN: protein amino acid phosphorylation; LOCATED IN: cellular_component unknown; EXPRESSED IN: 23 plant structures; EXPRESSED DURING: 14 growth stages; CONTAINS InterPro DOMAIN/s: Protein kinase, ATP binding site (InterPro:…
'29.5'	'protein.degradation'	HORVU6Hr1G006880,4	9.04985	3.67414e-73	'(p21529|cbp3_horvu : 830.0) Serine carboxypeptidase 3 precursor (EC 3.4.16.5) (Serine carboxypeptidase III) (CP-MIII) - Hordeum vulgare (Barley) & (loc_os02g02320.1 : 754.0) no description available & (at3g10410 : 603.0) SERINE CARBOXYPEPTIDASE-LIKE 49 (SCPL49); FUNCTIONS IN: serine-type carboxypeptidase activity; INVOLVED IN: proteolysis; LOCATED IN: vacuole; EXPRESSED IN: 25 plant structures; …
'29.5'	'protein.degradation'	HORVU3Hr1G070790,8	9.87191	5.08978e-207	'(loc_os01g54010.1 : 580.0) no description available & (at5g19740 : 420.0) Peptidase M28 family protein; FUNCTIONS IN: dipeptidase activity; INVOLVED IN: proteolysis; LOCATED IN: vacuole; CONTAINS InterPro DOMAIN/s: Protease-associated PA (InterPro:IPR003137), Transferrin receptor-like, dimerisation (InterPro:IPR007365), Peptidase M28 (InterPro:IPR007484); BEST Arabidopsis thaliana protein match …
'29.5'	'protein.degradation'	HORVU5Hr1G080090,6	8.7879	1.78583e-85	'(loc_os10g01134.2 : 352.0) no description available & (at2g22990 : 181.0) sinapoylglucose:malate sinapoyltransferase. Catalyzes the formation of sinapoylmalate from sinapoylglucose. Mutants accumulate excess sinapoylglucose.; sinapoylglucose 1; CONTAINS InterPro DOMAIN/s: Peptidase S10, serine carboxypeptidase (InterPro:IPR001563); BEST Arabidopsis thaliana protein match is: serine carboxypeptid…
'29.5.11'	'protein.degradation.ubiquitin'	HORVU3Hr1G095890,2	10.5469	2.9767e-116	'(loc_os01g70140.1 : 288.0) no description available & (at5g50870 : 211.0) ubiquitin-conjugating enzyme 27 (UBC27); CONTAINS InterPro DOMAIN/s: Ubiquitin-conjugating enzyme/RWD-like (InterPro:IPR016135), Ubiquitin-associated/translation elongation factor EF1B, N-terminal, eukaryote (InterPro:IPR015940), Ubiquitin-associated/translation elongation factor EF1B, N-terminal (InterPro:IPR000449), Ubiq…
'29.5.11.1'	'protein.degradation.ubiquitin.ubiquitin'	HORVU5Hr1G042600,3	10.6573	2.2437e-30	'(loc_os12g04924.1 : 149.0) no description available & (at3g45180 : 145.0) Ubiquitin-like superfamily protein; CONTAINS InterPro DOMAIN/s: Ubiquitin (InterPro:IPR000626), Ubiquitin supergroup (InterPro:IPR019955); BEST Arabidopsis thaliana protein match is: ubiquitin-like protein 5 (TAIR:AT5G42300.1); Has 399 Blast hits to 399 proteins in 174 species: Archae - 0; Bacteria - 0; Metazoa - 169; Fung…
'29.5.11.20'	'protein.degradation.ubiquitin.proteasom'	HORVU5Hr1G110330,3	8.91886	1.14771e-36	'(loc_os06g06030.1 : 446.0) no description available & (at1g13060 : 404.0) Encodes 20S proteasome beta subunit PBE1 (PBE1).; 20S proteasome beta subunit E1 (PBE1); FUNCTIONS IN: peptidase activity, threonine-type endopeptidase activity; INVOLVED IN: ubiquitin-dependent protein catabolic process; LOCATED IN: proteasome core complex, proteasome complex; EXPRESSED IN: guard cell, pollen tube; EXPRES…
'29.5.11.3'	'protein.degradation.ubiquitin.E2'	HORVU5Hr1G038790,9	10.2644	4.221e-48	'(loc_os12g44000.1 : 132.0) no description available & (at1g45050 : 120.0) member of ubiquitin-conjugating E2-proteins; ATUBC2-1; CONTAINS InterPro DOMAIN/s: Ubiquitin-conjugating enzyme/RWD-like (InterPro:IPR016135), Ubiquitin-conjugating enzyme, E2 (InterPro:IPR000608); BEST Arabidopsis thaliana protein match is: ubiquitin-conjugating enzyme 18 (TAIR:AT5G42990.1); Has 9046 Blast hits to 9044 pr…
'29.5.11.4.2'	'protein.degradation.ubiquitin.E3.RING'	HORVU3Hr1G093930,9	9.7039	1.31959e-222	'(loc_os02g04490.1 : 160.0) no description available & (at3g07200 : 85.9) RING/U-box superfamily protein; FUNCTIONS IN: zinc ion binding; EXPRESSED IN: 23 plant structures; EXPRESSED DURING: 13 growth stages; CONTAINS InterPro DOMAIN/s: Zinc finger, RING-type, conserved site (InterPro:IPR017907), Zinc finger, RING-type (InterPro:IPR001841), Zinc finger, C3HC4 RING-type (InterPro:IPR018957); BEST …
'29.5.11.4.2'	'protein.degradation.ubiquitin.E3.RING'	HORVU5Hr1G092290,4	8.75154	2.63326e-61	'(loc_os03g44810.2 : 329.0) no description available & (at2g38920 : 203.0) SPX (SYG1/Pho81/XPR1) domain-containing protein / zinc finger (C3HC4-type RING finger) protein-related; FUNCTIONS IN: zinc ion binding; EXPRESSED IN: male gametophyte, flower, pollen tube; EXPRESSED DURING: M germinated pollen stage, 4 anthesis; CONTAINS InterPro DOMAIN/s: Zinc finger, RING-type, conserved site (InterPro:I…
'29.5.11.4.2'	'protein.degradation.ubiquitin.E3.RING'	HORVU7Hr1G076230,2	8.73809	2.54114e-38	'(loc_os08g02140.1 : 309.0) no description available & (at3g07370 : 229.0) Encodes AtCHIP, a new class of E3 ubiquitin ligases with three tetratricopeptide repeats and a U-box domain, structurally similar to the animal CHIP proteins. Plays an important role in plant cellular metabolism under temperature stress conditions. Functions as an E3 ubiquitin ligase of protein phosphatase 2A subunits and …
'29.5.11.4.3.2'	'protein.degradation.ubiquitin.E3.SCF.FBOX'	HORVU2Hr1G104500,10	10.2656	9.57112e-78	'(loc_os02g56840.1 : 220.0) no description available & (at2g02360 : 151.0) phloem protein 2-B10 (PP2-B10); CONTAINS InterPro DOMAIN/s: F-box domain, cyclin-like (InterPro:IPR001810), F-box domain, Skp2-like (InterPro:IPR022364); BEST Arabidopsis thaliana protein match is: F-box family protein (TAIR:AT2G02240.1); Has 572 Blast hits to 558 proteins in 38 species: Archae - 0; Bacteria - 0; Metazoa -…
'29.5.11.4.3.3'	'protein.degradation.ubiquitin.E3.SCF.cullin'	HORVU1Hr1G020400,5	8.74147	8.4508e-70	'(loc_os01g27150.1 : 858.0) no description available & (at4g02570 : 724.0) Encodes a cullin that is a component of SCF ubiquitin ligase complexes involved in mediating responses to auxin and jasmonic acid. Homozygous auxin-resistant mutants arrest growth soon after germination, lacking a root and hypocotyl. Heterozygotes display a variety of phenotypes consistent with impaired auxin response.; cu…
'29.5.3'	'protein.degradation.cysteine protease'	HORVU3Hr1G039020,1	10.5622	2.51708e-60	'(loc_os08g44270.1 : 95.9) no description available & (o65039|cysep_ricco : 93.6) Vignain precursor (EC 3.4.22.-) (Cysteine endopeptidase) - Ricinus communis (Castor bean) & (at5g50260 : 89.0) Cysteine proteinases superfamily protein; FUNCTIONS IN: cysteine-type endopeptidase activity, cysteine-type peptidase activity; INVOLVED IN: proteolysis; LOCATED IN: endomembrane system; EXPRESSED IN: 8 pla…
'29.5.3'	'protein.degradation.cysteine protease'	HORVU4Hr1G012700,1	9.4818	0	'(loc_os11g14900.5 : 299.0) no description available & (o65039|cysep_ricco : 269.0) Vignain precursor (EC 3.4.22.-) (Cysteine endopeptidase) - Ricinus communis (Castor bean) & (at5g50260 : 243.0) Cysteine proteinases superfamily protein; FUNCTIONS IN: cysteine-type endopeptidase activity, cysteine-type peptidase activity; INVOLVED IN: proteolysis; LOCATED IN: endomembrane system; EXPRESSED IN: 8 …
'29.5.4'	'protein.degradation.aspartate protease'	HORVU3Hr1G100350,2	9.48985	1.21111e-109	'(loc_os01g71090.1 : 365.0) no description available & (at1g03230 : 145.0) Eukaryotic aspartyl protease family protein; FUNCTIONS IN: aspartic-type endopeptidase activity; INVOLVED IN: response to salt stress; LOCATED IN: cell wall, plant-type cell wall; EXPRESSED IN: stem, root; CONTAINS InterPro DOMAIN/s: Peptidase aspartic (InterPro:IPR021109), Peptidase aspartic, catalytic (InterPro:IPR009007…
'29.5.4'	'protein.degradation.aspartate protease'	HORVU6Hr1G072910,4	10.9256	4.3039e-151	'(loc_os02g49800.1 : 612.0) no description available & (at1g49050 : 314.0) Eukaryotic aspartyl protease family protein; FUNCTIONS IN: aspartic-type endopeptidase activity; INVOLVED IN: proteolysis; LOCATED IN: endomembrane system; EXPRESSED IN: 24 plant structures; EXPRESSED DURING: 13 growth stages; CONTAINS InterPro DOMAIN/s: Peptidase aspartic (InterPro:IPR021109), Peptidase aspartic, catalyti…
'29.5.4'	'protein.degradation.aspartate protease'	HORVU7Hr1G007690,1	10.543	4.49402e-199	'(loc_os03g20290.1 : 360.0) no description available & (at2g03200 : 278.0) Eukaryotic aspartyl protease family protein; FUNCTIONS IN: aspartic-type endopeptidase activity; INVOLVED IN: proteolysis; LOCATED IN: endomembrane system; EXPRESSED IN: 10 plant structures; EXPRESSED DURING: 4 anthesis, C globular stage, petal differentiation and expansion stage; CONTAINS InterPro DOMAIN/s: Peptidase aspa…
'29.5.4'	'protein.degradation.aspartate protease'	HORVU1Hr1G017570,9	10.2609	2.4786e-67	'(p42211|asprx_orysa : 773.0) Aspartic proteinase precursor (EC 3.4.23.-) - Oryza sativa (Rice) & (loc_os05g04630.6 : 773.0) no description available & (at1g11910 : 543.0) Encodes an aspartic proteinase that forms a heterodimer and is stable over a broad pH range (ph 3-8).; aspartic proteinase A1 (APA1); FUNCTIONS IN: endopeptidase activity; INVOLVED IN: proteolysis, response to salt stress; LOCA…
'29.5.5'	'protein.degradation.serine protease'	HORVU4Hr1G013480,1	9.31965	0	'(p06293|prtz_horvu : 707.0) Protein Z (Z4) (Major endosperm albumin) - Hordeum vulgare (Barley) & (loc_os03g41438.1 : 476.0) no description available & (at1g47710 : 348.0) Serine protease inhibitor (SERPIN) family protein; FUNCTIONS IN: serine-type endopeptidase inhibitor activity, cysteine-type endopeptidase inhibitor activity; INVOLVED IN: biological_process unknown; LOCATED IN: apoplast; EXPR…
'29.5.5'	'protein.degradation.serine protease'	HORVU5Hr1G111920,1	15.5605	0	'(loc_os03g41419.1 : 361.0) no description available & (p06293|prtz_horvu : 354.0) Protein Z (Z4) (Major endosperm albumin) - Hordeum vulgare (Barley) & (at1g47710 : 275.0) Serine protease inhibitor (SERPIN) family protein; FUNCTIONS IN: serine-type endopeptidase inhibitor activity, cysteine-type endopeptidase inhibitor activity; INVOLVED IN: biological_process unknown; LOCATED IN: apoplast; EXPR…
'29.5.5'	'protein.degradation.serine protease'	HORVU7Hr1G056630,2	9.40301	1.11684e-84	'(loc_os09g35730.1 : 167.0) no description available & (at5g07250 : 117.0) RHOMBOID-like protein 3 (RBL3); FUNCTIONS IN: serine-type endopeptidase activity; LOCATED IN: integral to membrane; EXPRESSED IN: 24 plant structures; EXPRESSED DURING: 15 growth stages; CONTAINS InterPro DOMAIN/s: Peptidase S54, rhomboid (InterPro:IPR002610); BEST Arabidopsis thaliana protein match is: RHOMBOID-like 1 (TA…
'29.5.9'	'protein.degradation.AAA type'	HORVU1Hr1G076180,23	8.85487	5.92266e-103	'(loc_os05g44310.1 : 717.0) no description available & (at4g04910 : 627.0) N-ethylmaleimide sensitive factor; N-ethylmaleimide sensitive factor (NSF); FUNCTIONS IN: protein binding; LOCATED IN: vacuole; EXPRESSED IN: 26 plant structures; EXPRESSED DURING: 15 growth stages; CONTAINS InterPro DOMAIN/s: ATPase, AAA+ type, core (InterPro:IPR003593), ATPase, AAA-type, core (InterPro:IPR003959), ATPase…
'29.6'	'protein.folding'	HORVU7Hr1G044070,3	9.25739	1.61266e-54	'(loc_os04g46620.1 : 957.0) no description available & (at3g20050 : 894.0) Encodes a putative cytoplasmic chaperonin that is similar to mouse Tcp-1 (t complex polypeptide 1).; T-complex protein 1 alpha subunit (TCP-1); FUNCTIONS IN: unfolded protein binding, ATP binding; INVOLVED IN: protein folding, cellular protein metabolic process; LOCATED IN: cellular_component unknown; EXPRESSED IN: 24 plan…
'30.11'	'signalling.light'	HORVU4Hr1G063190,1	9.43879	5.95248e-68	'(p14895|eli5_horvu : 213.0) High molecular mass early light-inducible protein HV58, chloroplast precursor (ELIP) - Hordeum vulgare (Barley) & (loc_os07g08150.1 : 200.0) no description available & (at3g22840 : 151.0) Encodes an early light-inducible protein.; EARLY LIGHT-INDUCABLE PROTEIN (ELIP1); BEST Arabidopsis thaliana protein match is: Chlorophyll A-B binding family protein (TAIR:AT4G14690.1…
'30.11'	'signalling.light'	HORVU7Hr1G106960,6	8.90989	9.97138e-23	'(loc_os06g46030.1 : 255.0) no description available & (at3g23290 : 201.0) LIGHT SENSITIVE HYPOCOTYLS 4 (LSH4); CONTAINS InterPro DOMAIN/s: Protein of unknown function DUF640 (InterPro:IPR006936); BEST Arabidopsis thaliana protein match is: Protein of unknown function (DUF640) (TAIR:AT2G31160.1); Has 30201 Blast hits to 17322 proteins in 780 species: Archae - 12; Bacteria - 1396; Metazoa - 17338;…
'30.2.16'	'signalling.receptor kinases.Catharanthus roseus-like RLK1'	HORVU2Hr1G038950,2	9.90539	0	'(loc_os07g05370.1 : 1166.0) no description available & (at1g30570 : 763.0) Encodes HERCULES2 (HERK2), a receptor kinase regulated by Brassinosteroids and required for cell elongation during vegetative growth.; hercules receptor kinase 2 (HERK2); FUNCTIONS IN: kinase activity; INVOLVED IN: response to brassinosteroid stimulus, unidimensional cell growth; LOCATED IN: plasma membrane; EXPRESSED IN:…
'30.3'	'signalling.calcium'	HORVU2Hr1G052430,4	8.90989	1.71162e-91	'(loc_os07g22640.2 : 399.0) no description available & (at3g61050 : 313.0) NTMC2T4; FUNCTIONS IN: lipid binding; INVOLVED IN: biological_process unknown; LOCATED IN: plasma membrane; EXPRESSED IN: male gametophyte, cultured cell, callus, pollen tube; EXPRESSED DURING: M germinated pollen stage; CONTAINS InterPro DOMAIN/s: C2 membrane targeting protein (InterPro:IPR018029), C2 calcium/lipid-bindin…
'30.3'	'signalling.calcium'	HORVU2Hr1G098660,2	10.0607	1.9171e-153	'(loc_os10g09850.1 : 102.0) no description available & (at4g38810 : 87.0) Calcium-binding EF-hand family protein; FUNCTIONS IN: calcium ion binding; LOCATED IN: cellular_component unknown; EXPRESSED IN: 23 plant structures; EXPRESSED DURING: 13 growth stages; CONTAINS InterPro DOMAIN/s: EF-Hand 1, calcium-binding site (InterPro:IPR018247), EF-HAND 2 (InterPro:IPR018249), Calcium-binding EF-hand (…
'30.4.1'	'signalling.phosphinositides.phosphatidylinositol-4-phosphate 5-kinase'	HORVU7Hr1G122690,19	10.4584	9.66256e-56	'(loc_os02g57660.1 : 725.0) no description available & (at3g09920 : 656.0) phosphatidyl inositol monophosphate 5 kinase (PIP5K9); FUNCTIONS IN: 1-phosphatidylinositol-4-phosphate 5-kinase activity, phosphatidylinositol phosphate kinase activity, ATP binding; INVOLVED IN: carbohydrate metabolic process, cellular amino acid metabolic process; LOCATED IN: cytosol, nucleus, membrane; EXPRESSED IN: 22…
'31.1'	'cell.organisation'	HORVU3Hr1G105860,2	9.21189	2.35398e-67	'(loc_os09g23160.2 : 396.0) no description available & (at1g68090 : 260.0) Encodes a calcium-binding protein annexin (AnnAt5).; annexin 5 (ANN5); FUNCTIONS IN: calcium-dependent phospholipid binding, calcium ion binding; INVOLVED IN: response to red or far red light, response to water deprivation, response to salt stress, response to cold, response to heat; LOCATED IN: cellular_component unknown;…
'31.1'	'cell.organisation'	HORVU1Hr1G072640,2	10.0403	6.78184e-135	'(loc_os05g38330.1 : 276.0) no description available & (at5g02130 : 142.0) mutant has Growth rate reduction, increased salt sensitivity; Putative Kinesin Light Chain; NDP1; FUNCTIONS IN: binding; INVOLVED IN: biological_process unknown; LOCATED IN: cellular_component unknown; EXPRESSED IN: 22 plant structures; EXPRESSED DURING: 11 growth stages; CONTAINS InterPro DOMAIN/s: Tetratricopeptide-like …
'31.1.1.1.2'	'cell.organisation.cytoskeleton.actin.actin depolymerizing factors'	HORVU5Hr1G100770,2	9.82496	1.34435e-31	'(loc_os03g56790.1 : 277.0) no description available & (q8sag3|adf_vitvi : 218.0) Actin-depolymerizing factor (ADF) - Vitis vinifera (Grape) & (at2g31200 : 212.0) Encodes actin depolymerizing factor 6 (ADF6).; actin depolymerizing factor 6 (ADF6); FUNCTIONS IN: actin binding; INVOLVED IN: biological_process unknown; LOCATED IN: intracellular; EXPRESSED IN: 24 plant structures; EXPRESSED DURING: 1…
'31.3'	'cell.cycle'	HORVU3Hr1G063320,1	8.92778	1.96125e-52	'(loc_os01g49010.2 : 590.0) no description available & (at2g01120 : 435.0) Origin Recognition Complex subunit 4. Involved in the initiation of DNA replication. Regulated transcriptionally during cell cycle, peaking at G1/S-phase. Target of E2F/DF family of transcription factors. Interacts with all ORC subunits except ORC1b.; origin recognition complex subunit 4 (ORC4); CONTAINS InterPro DOMAIN/s:…
'31.4'	'cell.vesicle transport'	HORVU5Hr1G048010,11	9.00843	1.59311e-165	'(loc_os11g01380.1 : 2989.0) no description available & (at3g11130 : 2851.0) Clathrin, heavy chain; FUNCTIONS IN: structural molecule activity, binding; INVOLVED IN: intracellular protein transport, vesicle-mediated transport; LOCATED IN: plasma membrane, vacuole; EXPRESSED IN: male gametophyte, guard cell, cultured cell, pollen tube; EXPRESSED DURING: L mature pollen stage, M germinated pollen s…
'31.4'	'cell.vesicle transport'	HORVU7Hr1G019930,4	10.4491	1.13727e-122	'(loc_os06g05180.3 : 247.0) no description available & (at3g15980 : 179.0) Coatomer, beta' subunit; FUNCTIONS IN: structural molecule activity; INVOLVED IN: intracellular protein transport, vesicle-mediated transport; LOCATED IN: membrane coat, COPI vesicle coat; EXPRESSED IN: 24 plant structures; EXPRESSED DURING: 13 growth stages; CONTAINS InterPro DOMAIN/s: WD40 repeat 2 (InterPro:IPR019782), …
'33.1'	'development.storage proteins'	HORVU3Hr1G116010,2	8.95031	4.43332e-186	'(loc_os01g74480.1 : 593.0) no description available & (at2g28680 : 472.0) RmlC-like cupins superfamily protein; FUNCTIONS IN: nutrient reservoir activity; INVOLVED IN: biological_process unknown; LOCATED IN: cellular_component unknown; EXPRESSED IN: petal, leaf whorl, sepal, male gametophyte, flower; EXPRESSED DURING: 4 anthesis, petal differentiation and expansion stage; CONTAINS InterPro DOMAI…
'33.1'	'development.storage proteins'	HORVU5Hr1G104630,1	12.4504	0	'(loc_os03g57960.1 : 357.0) no description available & (p15590|glb1_maize : 198.0) Globulin-1 S allele precursor (GLB1-S) (7S-like) - Zea mays (Maize) & (at3g22640 : 128.0) PAP85; FUNCTIONS IN: nutrient reservoir activity; INVOLVED IN: biological_process unknown; LOCATED IN: plant-type cell wall; EXPRESSED IN: stem, seed; EXPRESSED DURING: seedling growth, seed development stages; CONTAINS InterP…
'33.1'	'development.storage proteins'	HORVU4Hr1G002800,1	9.33052	0	'(loc_os03g46100.1 : 345.0) no description available & (p15590|glb1_maize : 339.0) Globulin-1 S allele precursor (GLB1-S) (7S-like) - Zea mays (Maize) & (at3g22640 : 105.0) PAP85; FUNCTIONS IN: nutrient reservoir activity; INVOLVED IN: biological_process unknown; LOCATED IN: plant-type cell wall; EXPRESSED IN: stem, seed; EXPRESSED DURING: seedling growth, seed development stages; CONTAINS InterP…
'33.2'	'development.late embryogenesis abundant'	HORVU3Hr1G039050,1	9.39232	8.37082e-92	'(loc_os01g16920.1 : 139.0) no description available & (p20075|lead8_dauca : 89.0) Embryonic protein DC-8 - Daucus carota (Carrot) & (at2g36640 : 87.8) Encodes putative phosphotyrosine protein belonging to late embryogenesis abundant (LEA) protein in group 3 that might be involved in maturation and desiccation tolerance of seeds. RFLP and CAPS mapping place it on chromosome 4 but the nucleotide s…
'33.2'	'development.late embryogenesis abundant'	HORVU7Hr1G082040,3	11.432	0	'(loc_os06g23350.1 : 287.0) no description available & (p09444|lea34_goshi : 163.0) Late embryogenesis abundant protein D-34 (LEA D-34) - Gossypium hirsutum (Upland cotton) & (at3g22490 : 160.0) Seed maturation protein; CONTAINS InterPro DOMAIN/s: Seed maturation protein (InterPro:IPR007011); BEST Arabidopsis thaliana protein match is: Seed maturation protein (TAIR:AT3G22500.1); Has 198 Blast hit…
'33.2'	'development.late embryogenesis abundant'	HORVU5Hr1G094680,1	10.1189	1.05449e-45	'(loc_os03g53610.1 : 94.4) no description available & (p09444|lea34_goshi : 91.3) Late embryogenesis abundant protein D-34 (LEA D-34) - Gossypium hirsutum (Upland cotton) & (at3g22500 : 85.9) late embryogenesis abundant (LEA) protein; LATE EMBRYOGENESIS ABUNDANT PROTEIN ECP31 (ATECP31); FUNCTIONS IN: molecular_function unknown; INVOLVED IN: embryo development ending in seed dormancy; LOCATED IN: …
'33.99'	'development.unspecified'	HORVU0Hr1G007340,2	11.1053	8.70288e-298	'(loc_os03g32170.1 : 661.0) no description available & (at4g24220 : 456.0) encodes a novel protein containing mammalian death domain involved in programmed cell death. Gene is expressed in vascular system and mutants carrying dominant mutation in the gene have defective vascular patterning. Gene expression is induced specifically by wounding.; VEIN PATTERNING 1 (VEP1); FUNCTIONS IN: binding, cata…
'33.99'	'development.unspecified'	HORVU4Hr1G024360,11	9.03617	1.02343e-70	'(loc_os03g19650.3 : 741.0) no description available & (at3g06430 : 586.0) embryo defective 2750 (EMB2750); INVOLVED IN: pollen tube development, embryo development ending in seed dormancy; LOCATED IN: chloroplast; CONTAINS InterPro DOMAIN/s: Pentatricopeptide repeat (InterPro:IPR002885); BEST Arabidopsis thaliana protein match is: Tetratricopeptide repeat (TPR)-like superfamily protein (TAIR:AT3…
'33.99'	'development.unspecified'	HORVU6Hr1G055960,5	9.73132	1.91963e-37	'(loc_os02g19820.1 : 295.0) no description available & (at4g10850 : 174.0) Nodulin MtN3 family protein; LOCATED IN: endomembrane system, integral to membrane, membrane; EXPRESSED IN: 9 plant structures; EXPRESSED DURING: 4 anthesis, C globular stage, petal differentiation and expansion stage, E expanded cotyledon stage; CONTAINS InterPro DOMAIN/s: MtN3/saliva-related transmembrane protein, conser…
'34.12'	'transport.metal'	HORVU2Hr1G029720,7	8.89785	2.90552e-24	'(loc_os07g43040.1 : 127.0) no description available & (at4g33520 : 90.1) Encodes a putative metal-transporting P-type ATPase.; P-type ATP-ase 1 (PAA1); FUNCTIONS IN: copper ion transmembrane transporter activity, ATPase activity, coupled to transmembrane movement of ions, phosphorylative mechanism; INVOLVED IN: photosynthetic electron transport chain; LOCATED IN: chloroplast, chloroplast envelop…
'34.12'	'transport.metal'	HORVU2Hr1G102840,16	10.3219	8.1354e-158	'(q5tkg3|cax1b_orysa : 335.0) Vacuolar cation/proton exchanger 1b (Ca(2+)/H(+) exchanger 1b) (OsCAX1b) - Oryza sativa (Rice) & (loc_os05g51610.1 : 335.0) no description available & (at3g51860 : 262.0) cation exchanger 3 (CAX3); CONTAINS InterPro DOMAIN/s: Sodium/calcium exchanger membrane region (InterPro:IPR004837), Calcium/proton exchanger superfamily (InterPro:IPR004798), Calcium/proton exchan…
'34.12'	'transport.metal'	HORVU2Hr1G112230,5	9.18488	1.03814e-37	'(loc_os07g12890.2 : 178.0) no description available & (at1g05300 : 127.0) member of Fe(II) transporter isolog family; zinc transporter 5 precursor (ZIP5); FUNCTIONS IN: cation transmembrane transporter activity, metal ion transmembrane transporter activity; INVOLVED IN: response to zinc ion, cation transport; LOCATED IN: endomembrane system, integral to membrane, membrane; EXPRESSED IN: 10 plant…
'34.14'	'transport.unspecified cations'	HORVU2Hr1G086400,5	9.41574	5.44012e-53	'(loc_os04g42280.1 : 432.0) no description available & (at1g80900 : 343.0) Transmembrane magnesium transporter. One of nine family members.; magnesium transporter 1 (MGT1); FUNCTIONS IN: magnesium ion transmembrane transporter activity, metal ion transmembrane transporter activity; INVOLVED IN: transmembrane transport, metal ion transport; LOCATED IN: membrane; EXPRESSED IN: 29 plant structures; …
'34.15'	'transport.potassium'	HORVU2Hr1G098940,19	10.3399	0	'(q7xlc6|hak11_orysa : 1328.0) Probable potassium transporter 11 (OsHAK11) - Oryza sativa (Rice) & (loc_os04g52390.1 : 1328.0) no description available & (at2g35060 : 1032.0) potassium transporter; K+ uptake permease 11 (KUP11); FUNCTIONS IN: potassium ion transmembrane transporter activity; INVOLVED IN: potassium ion transport, pollen development; LOCATED IN: plasma membrane; EXPRESSED IN: 22 pl…
'34.19.1'	'transport.Major Intrinsic Proteins.PIP'	HORVU2Hr1G096360,16	8.86419	2.55326e-27	'(q6eu94|pip11_orysa : 226.0) Aquaporin PIP1.1 (Plasma membrane intrinsic protein 1a) (PIP1a) (OsPIP1.1) (Water channel protein RWC1) (RWC-1) - Oryza sativa (Rice) & (loc_os02g44630.2 : 226.0) no description available & (at4g23400 : 223.0) plasma membrane intrinsic protein 1;5 (PIP1;5); FUNCTIONS IN: water channel activity; INVOLVED IN: response to salt stress, transport; LOCATED IN: plasma membr…
'34.19.2'	'transport.Major Intrinsic Proteins.TIP'	HORVU1Hr1G043890,1	10.3652	5.59998e-134	'(q9fwv6|tip31_orysa : 347.0) Probable aquaporin TIP3.1 (Tonoplast intrinsic protein 3.1) (OsTIP3.1) - Oryza sativa (Rice) & (loc_os10g35050.1 : 347.0) no description available & (at1g73190 : 279.0) Moves to the Protein Storage Vacuole in a Golgi independent manner; TIP3;1; FUNCTIONS IN: water channel activity; INVOLVED IN: autophagy, transport; LOCATED IN: plant-type vacuole membrane, protein st…
'34.2'	'transport.sugars'	HORVU2Hr1G064160,8	9.05257	9.97138e-23	'(loc_os07g01560.1 : 250.0) no description available & (at3g19930 : 176.0) Encodes a sucrose hydrogen symporter that is induced by wounding.; sugar transporter 4 (STP4); FUNCTIONS IN: carbohydrate transmembrane transporter activity, sugar:hydrogen symporter activity, monosaccharide transmembrane transporter activity, sucrose:hydrogen symporter activity; INVOLVED IN: defense response to fungus, re…
'34.2'	'transport.sugars'	HORVU4Hr1G067450,5	10.4808	2.79144e-266	'(loc_os03g11900.1 : 785.0) no description available & (at5g26340 : 704.0) Encodes a protein with high affinity, hexose-specific/H+ symporter activity. The activity of the transporter appears to be negatively regulated by phosphorylation. Importantly, microarray analysis, as well as the study of the expression of this gene in mutants involved in programmed cell death (PCD) demonstrated a tight co…
'34.3'	'transport.amino acids'	HORVU4Hr1G008580,5	9.83131	3.3394e-146	'(loc_os03g51050.1 : 1033.0) no description available & (at2g02040 : 823.0) Encodes a di- and tri-peptide transporter that recognizes a variety of different amino acid combinations. Expression of the transcripts for this gene can be detected in the embryo through in situ hybridization. This protein does not have nitrate transporter activity based on oocyte transport assays.; peptide transporter 2…
'34.3'	'transport.amino acids'	HORVU1Hr1G051330,11	8.79116	1.81779e-73	'(loc_os10g42900.1 : 365.0) no description available & (at1g62200 : 227.0) Major facilitator superfamily protein; FUNCTIONS IN: transporter activity; INVOLVED IN: oligopeptide transport; LOCATED IN: membrane; EXPRESSED IN: 23 plant structures; EXPRESSED DURING: 15 growth stages; CONTAINS InterPro DOMAIN/s: PTR2 family proton/oligopeptide symporter, conserved site (InterPro:IPR018456), Oligopeptid…
'34.3'	'transport.amino acids'	HORVU6Hr1G034900,3	8.82337	7.946e-78	'(loc_os02g09810.3 : 654.0) no description available & (at3g30390 : 444.0) Encodes a putative amino acid transporter.; Transmembrane amino acid transporter family protein; FUNCTIONS IN: amino acid transmembrane transporter activity; INVOLVED IN: amino acid transport; LOCATED IN: plasma membrane, vacuole, membrane; EXPRESSED IN: 25 plant structures; EXPRESSED DURING: 15 growth stages; CONTAINS Int…
'34.99'	'transport.misc'	HORVU5Hr1G125450,1	10.7682	1.30654e-97	'(loc_os07g24000.1 : 139.0) no description available & (at1g04560 : 112.0) AWPM-19-like family protein; FUNCTIONS IN: molecular_function unknown; INVOLVED IN: biological_process unknown; LOCATED IN: endomembrane system; CONTAINS InterPro DOMAIN/s: AWPM-19-like (InterPro:IPR008390); BEST Arabidopsis thaliana protein match is: AWPM-19-like family protein (TAIR:AT5G46530.1); Has 177 Blast hits to 17…
'34.99'	'transport.misc'	HORVU5Hr1G125460,4	11.3066	2.0296e-114	'(loc_os07g24000.1 : 141.0) no description available & (at1g04560 : 117.0) AWPM-19-like family protein; FUNCTIONS IN: molecular_function unknown; INVOLVED IN: biological_process unknown; LOCATED IN: endomembrane system; CONTAINS InterPro DOMAIN/s: AWPM-19-like (InterPro:IPR008390); BEST Arabidopsis thaliana protein match is: AWPM-19-like family protein (TAIR:AT5G46530.1); Has 177 Blast hits to 17…
'34.99'	'transport.misc'	HORVU6Hr1G073090,7	10.1861	2.45796e-115	'(loc_os02g49860.1 : 174.0) no description available & (at1g04560 : 101.0) AWPM-19-like family protein; FUNCTIONS IN: molecular_function unknown; INVOLVED IN: biological_process unknown; LOCATED IN: endomembrane system; CONTAINS InterPro DOMAIN/s: AWPM-19-like (InterPro:IPR008390); BEST Arabidopsis thaliana protein match is: AWPM-19-like family protein (TAIR:AT5G46530.1); Has 177 Blast hits to 17…
'35.1'	'not assigned.no ontology'	HORVU1Hr1G062380,3	8.93074	1.96232e-44	'(loc_os07g26110.1 : 157.0) no description available & (at3g06390 : 94.7) Uncharacterised protein family (UPF0497); CONTAINS InterPro DOMAIN/s: Uncharacterised protein family UPF0497, trans-membrane plant (InterPro:IPR006702), Uncharacterised protein family UPF0497, trans-membrane plant subgroup (InterPro:IPR006459); BEST Arabidopsis thaliana protein match is: Uncharacterised protein family (UPF0…
'35.1'	'not assigned.no ontology'	HORVU1Hr1G088780,6	9.45121	7.09142e-126	'(loc_os05g49170.1 : 186.0) no description available & (at1g29395 : 152.0) Integral membrane protein in the inner envelope of chloroplasts. Provide freezing tolerance. Expression is induced by short-term cold-treatment, water deprivation, and abscisic acid treatment.; COLD REGULATED 314 INNER MEMBRANE 1 (COR413IM1); FUNCTIONS IN: molecular_function unknown; INVOLVED IN: cold acclimation, cellular…
'35.1'	'not assigned.no ontology'	HORVU3Hr1G053460,6	9.03617	8.28622e-35	'(loc_os01g42480.1 : 295.0) no description available & (at5g27490 : 248.0) Integral membrane Yip1 family protein; FUNCTIONS IN: molecular_function unknown; INVOLVED IN: biological_process unknown; LOCATED IN: membrane; EXPRESSED IN: 23 plant structures; EXPRESSED DURING: 14 growth stages; CONTAINS InterPro DOMAIN/s: Yip1 domain (InterPro:IPR006977); BEST Arabidopsis thaliana protein match is: Int…
'35.1'	'not assigned.no ontology'	HORVU3Hr1G084260,4	9.05799	8.11828e-93	'(loc_os05g12140.1 : 693.0) no description available & (at4g23840 : 351.0) Leucine-rich repeat (LRR) family protein; BEST Arabidopsis thaliana protein match is: Leucine-rich repeat family protein (TAIR:AT1G15740.1); Has 13188 Blast hits to 8222 proteins in 561 species: Archae - 2; Bacteria - 5781; Metazoa - 2271; Fungi - 110; Plants - 3199; Viruses - 40; Other Eukaryotes - 1785 (source: NCBI BLin…
'35.1'	'not assigned.no ontology'	HORVU4Hr1G011280,3	10.3998	9.1225e-75	'(loc_os03g52690.4 : 363.0) no description available & (at5g10860 : 308.0) Cystathionine beta-synthase (CBS) family protein; FUNCTIONS IN: cobalt ion binding; INVOLVED IN: response to salt stress; LOCATED IN: mitochondrion; EXPRESSED IN: 24 plant structures; EXPRESSED DURING: 15 growth stages; CONTAINS InterPro DOMAIN/s: Cystathionine beta-synthase, core (InterPro:IPR000644); BEST Arabidopsis tha…
'35.1'	'not assigned.no ontology'	HORVU4Hr1G049990,10	8.95128	7.18314e-150	'(loc_os03g21850.1 : 571.0) no description available & (at3g51620 : 310.0) PAP/OAS1 substrate-binding domain superfamily; BEST Arabidopsis thaliana protein match is: nucleotidyltransferases (TAIR:AT3G61690.1); Has 386 Blast hits to 356 proteins in 104 species: Archae - 0; Bacteria - 4; Metazoa - 102; Fungi - 40; Plants - 181; Viruses - 0; Other Eukaryotes - 59 (source: NCBI BLink). & (reliability…
'35.1'	'not assigned.no ontology'	HORVU4Hr1G074740,10	8.98584	4.78934e-163	'(loc_os03g07170.1 : 203.0) no description available & (at3g60070 : 144.0) Major facilitator superfamily protein; FUNCTIONS IN: molecular_function unknown; INVOLVED IN: transmembrane transport; LOCATED IN: membrane; EXPRESSED IN: 25 plant structures; EXPRESSED DURING: 15 growth stages; CONTAINS InterPro DOMAIN/s: Major facilitator superfamily MFS-1 (InterPro:IPR011701), Major facilitator superfam…
'35.1'	'not assigned.no ontology'	HORVU5Hr1G030970,7	9.03067	1.98107e-22	'(loc_os06g12690.3 : 440.0) no description available & (at3g12760 : 340.0) CONTAINS InterPro DOMAIN/s: Defective-in-cullin neddylation protein (InterPro:IPR014764), Protein of unknown function DUF298 (InterPro:IPR005176), UBA-like (InterPro:IPR009060); BEST Arabidopsis thaliana protein match is: Domain of unknown function (DUF298) (TAIR:AT1G15860.2); Has 857 Blast hits to 855 proteins in 202 spec…
'35.1'	'not assigned.no ontology'	HORVU5Hr1G115230,4	8.93664	3.73372e-52	'(loc_os03g61130.1 : 927.0) no description available & (at1g07230 : 757.0) non-specific phospholipase C1 (NPC1); FUNCTIONS IN: hydrolase activity, acting on ester bonds; LOCATED IN: endomembrane system; EXPRESSED IN: 23 plant structures; EXPRESSED DURING: 13 growth stages; CONTAINS InterPro DOMAIN/s: Phosphoesterase (InterPro:IPR007312); BEST Arabidopsis thaliana protein match is: non-specific ph…
'35.1'	'not assigned.no ontology'	HORVU5Hr1G115470,4	9.25739	3.67414e-73	'(loc_os03g61210.1 : 417.0) no description available & (at5g26740 : 352.0) Protein of unknown function (DUF300); LOCATED IN: endomembrane system; EXPRESSED IN: 24 plant structures; EXPRESSED DURING: 13 growth stages; CONTAINS InterPro DOMAIN/s: Protein of unknown function DUF300 (InterPro:IPR005178); BEST Arabidopsis thaliana protein match is: Protein of unknown function (DUF300) (TAIR:AT3G05940.…
'35.1'	'not assigned.no ontology'	HORVU6Hr1G093540,3	8.95128	6.9996e-55	'(loc_os02g58030.1 : 239.0) no description available & (at3g15410 : 174.0) Leucine-rich repeat (LRR) family protein; CONTAINS InterPro DOMAIN/s: Leucine-rich repeat-containing protein (InterPro:IPR015766), Leucine-rich repeat, typical subtype (InterPro:IPR003591), Leucine-rich repeat (InterPro:IPR001611); BEST Arabidopsis thaliana protein match is: Leucine-rich repeat receptor-like protein kinase…
'35.1'	'not assigned.no ontology'	HORVU7Hr1G041850,11	8.92184	1.12247e-49	'(loc_os06g14740.1 : 1223.0) no description available & (at1g18270 : 840.0) ketose-bisphosphate aldolase class-II family protein; FUNCTIONS IN: in 8 functions; INVOLVED IN: oxidation reduction, pentose-phosphate shunt, valine metabolic process, glycolysis, metabolic process; EXPRESSED IN: 23 plant structures; EXPRESSED DURING: 13 growth stages; CONTAINS InterPro DOMAIN/s: Aldolase-type TIM barrel…
'35.1'	'not assigned.no ontology'	HORVU7Hr1G079030,3	9.16742	2.06734e-56	'(loc_os08g17680.1 : 378.0) no description available & (at2g25110 : 305.0) Encodes an endoplasmic reticulum protein SDF2 (stromal-derived factor-2). Forms a complex SDF2-ERdj3B-BiP that is required for the proper accumulation of the surface-exposed leucine-rich repeat receptor kinases EFR. EFR is involved in PAMP (pathogen associated molecular patterns) triggered immunity.; stromal cell-derived f…
'35.1'	'not assigned.no ontology'	HORVU1Hr1G079380,9	10.1836	2.65338e-86	'(loc_os05g46460.3 : 601.0) no description available & (at5g53050 : 435.0) alpha/beta-Hydrolases superfamily protein; FUNCTIONS IN: hydrolase activity, catalytic activity; EXPRESSED IN: 24 plant structures; EXPRESSED DURING: 15 growth stages; CONTAINS InterPro DOMAIN/s: Epoxide hydrolase-like (InterPro:IPR000639), Alpha/beta hydrolase fold-1 (InterPro:IPR000073); BEST Arabidopsis thaliana protein…
'35.1'	'not assigned.no ontology'	HORVU2Hr1G012690,1	10.2877	3.9101e-77	'(loc_os08g30790.3 : 308.0) no description available & (at5g62740 : 301.0) HYPERSENSITIVE-INDUCED RESPONSE PROTEIN 1 (HIR1); INVOLVED IN: N-terminal protein myristoylation; LOCATED IN: plasma membrane, vacuole, membrane; EXPRESSED IN: 25 plant structures; EXPRESSED DURING: 15 growth stages; CONTAINS InterPro DOMAIN/s: Band 7 protein (InterPro:IPR001107); BEST Arabidopsis thaliana protein match is…
'35.1'	'not assigned.no ontology'	HORVU4Hr1G006100,15	9.95565	1.75012e-78	'(loc_os03g49440.1 : 248.0) no description available & (at2g32150 : 187.0) Haloacid dehalogenase-like hydrolase (HAD) superfamily protein; FUNCTIONS IN: hydrolase activity, catalytic activity; INVOLVED IN: metabolic process; LOCATED IN: cellular_component unknown; EXPRESSED IN: 24 plant structures; EXPRESSED DURING: 13 growth stages; CONTAINS InterPro DOMAIN/s: Haloacid dehalogenase-like hydrolas…
'35.1'	'not assigned.no ontology'	HORVU4Hr1G006140,1	9.57365	3.53548e-14	'(loc_os03g49440.1 : 115.0) no description available & (at2g32150 : 97.8) Haloacid dehalogenase-like hydrolase (HAD) superfamily protein; FUNCTIONS IN: hydrolase activity, catalytic activity; INVOLVED IN: metabolic process; LOCATED IN: cellular_component unknown; EXPRESSED IN: 24 plant structures; EXPRESSED DURING: 13 growth stages; CONTAINS InterPro DOMAIN/s: Haloacid dehalogenase-like hydrolase…
'35.1'	'not assigned.no ontology'	HORVU7Hr1G095060,4	9.57932	4.24112e-37	'(loc_os08g33680.1 : 146.0) no description available & (at1g18720 : 96.7) Protein of unknown function (DUF962); CONTAINS InterPro DOMAIN/s: Protein of unknown function DUF962 (InterPro:IPR009305); BEST Arabidopsis thaliana protein match is: Protein of unknown function (DUF962) (TAIR:AT1G74440.1); Has 638 Blast hits to 636 proteins in 299 species: Archae - 0; Bacteria - 335; Metazoa - 3; Fungi - 1…
'35.1.40'	'not assigned.no ontology.glycine rich proteins'	HORVU4Hr1G004410,1	8.91289	2.33026e-71	'(loc_os03g48260.1 : 221.0) no description available & (at1g27090 : 96.7) glycine-rich protein; BEST Arabidopsis thaliana protein match is: unknown protein (TAIR:AT3G24690.1); Has 13206 Blast hits to 7104 proteins in 677 species: Archae - 0; Bacteria - 2039; Metazoa - 5686; Fungi - 1146; Plants - 2571; Viruses - 80; Other Eukaryotes - 1684 (source: NCBI BLink). & (reliability: 193.4) & (original …
'35.2'	'not assigned.unknown'	HORVU0Hr1G036340,1	8.93664	6.6829e-21	'(loc_os10g14020.1 : 128.0) no description available & (at1g32583 : 100.0) FUNCTIONS IN: molecular_function unknown; INVOLVED IN: biological_process unknown; LOCATED IN: endomembrane system; BEST Arabidopsis thaliana protein match is: tapetum determinant 1 (TAIR:AT4G24972.1); Has 35333 Blast hits to 34131 proteins in 2444 species: Archae - 798; Bacteria - 22429; Metazoa - 974; Fungi - 991; Plants…
'35.2'	'not assigned.unknown'	HORVU1Hr1G000440,3	10.927	2.93454e-149	' (original description: no original description)'
'35.2'	'not assigned.unknown'	HORVU1Hr1G004120,1	14.1823	0	' (original description: no original description)'
'35.2'	'not assigned.unknown'	HORVU1Hr1G012130,1	15.3021	0	' (original description: no original description)'
'35.2'	'not assigned.unknown'	HORVU1Hr1G012170,1	15.1337	0	' (original description: no original description)'
'35.2'	'not assigned.unknown'	HORVU1Hr1G044310,3	9.17243	7.11208e-25	' (original description: no original description)'
'35.2'	'not assigned.unknown'	HORVU1Hr1G055890,8	8.88264	1.19391e-45	'(loc_os10g41240.1 : 499.0) no description available & (at2g35680 : 299.0) Phosphotyrosine protein phosphatases superfamily protein; FUNCTIONS IN: phosphatase activity, protein tyrosine phosphatase activity, protein tyrosine/serine/threonine phosphatase activity; INVOLVED IN: protein amino acid dephosphorylation, dephosphorylation; LOCATED IN: cellular_component unknown; EXPRESSED IN: 24 plant st…
'35.2'	'not assigned.unknown'	HORVU1Hr1G064080,2	10.5177	1.2224e-251	' (original description: no original description)'
'35.2'	'not assigned.unknown'	HORVU1Hr1G079860,2	9.22159	2.91704e-68	'(loc_os05g46250.1 : 347.0) no description available & (at5g11840 : 238.0) Protein of unknown function (DUF1230); FUNCTIONS IN: molecular_function unknown; INVOLVED IN: biological_process unknown; LOCATED IN: chloroplast; EXPRESSED IN: 23 plant structures; EXPRESSED DURING: 13 growth stages; CONTAINS InterPro DOMAIN/s: Protein of unknown function DUF1230 (InterPro:IPR009631); BEST Arabidopsis tha…
'35.2'	'not assigned.unknown'	HORVU1Hr1G081490,4	8.98584	3.42038e-14	' no hits & (original description: no original description)'
'35.2'	'not assigned.unknown'	HORVU1Hr1G095250,1	9.09011	2.37646e-45	' (original description: no original description)'
'35.2'	'not assigned.unknown'	HORVU2Hr1G028670,1	8.98442	0	' (original description: no original description)'
'35.2'	'not assigned.unknown'	HORVU2Hr1G028780,3	12.5048	6.5911e-201	' (original description: no original description)'
'35.2'	'not assigned.unknown'	HORVU2Hr1G076320,1	9.43045	3.30638e-21	' no hits & (original description: no original description)'
'35.2'	'not assigned.unknown'	HORVU2Hr1G082990,8	9.07948	5.90066e-13	' (original description: no original description)'
'35.2'	'not assigned.unknown'	HORVU2Hr1G090070,4	8.91886	7.48888e-30	' (original description: no original description)'
'35.2'	'not assigned.unknown'	HORVU2Hr1G105760,1	10.7074	2.23306e-41	' (original description: no original description)'
'35.2'	'not assigned.unknown'	HORVU3Hr1G059030,1	11.9071	0	'(loc_os01g46600.1 : 110.0) no description available & (at2g21820 : 80.5) unknown protein; Has 45 Blast hits to 45 proteins in 13 species: Archae - 0; Bacteria - 0; Metazoa - 0; Fungi - 0; Plants - 45; Viruses - 0; Other Eukaryotes - 0 (source: NCBI BLink). & (reliability: 161.0) & (original description: no original description)'
'35.2'	'not assigned.unknown'	HORVU3Hr1G064390,8	8.92481	6.85134e-82	'(loc_os08g27050.1 : 275.0) no description available & (at1g73750 : 258.0) Uncharacterised conserved protein UCP031088, alpha/beta hydrolase; CONTAINS InterPro DOMAIN/s: Uncharacterised conserved protein UCP031088, alpha/beta hydrolase, At1g15070 (InterPro:IPR016969), Alpha/beta hydrolase fold-1 (InterPro:IPR000073); BEST Arabidopsis thaliana protein match is: Uncharacterised conserved protein UC…
'35.2'	'not assigned.unknown'	HORVU3Hr1G069140,1	11.9432	0	'(loc_os01g52830.1 : 414.0) no description available & (at1g29680 : 263.0) Protein of unknown function (DUF1264); CONTAINS InterPro DOMAIN/s: Protein of unknown function DUF1264 (InterPro:IPR010686); BEST Arabidopsis thaliana protein match is: Protein of unknown function (DUF1264) (TAIR:AT5G45690.1); Has 286 Blast hits to 286 proteins in 122 species: Archae - 0; Bacteria - 120; Metazoa - 0; Fungi…
'35.2'	'not assigned.unknown'	HORVU3Hr1G076490,1	11.1209	4.535e-30	' no hits & (original description: no original description)'
'35.2'	'not assigned.unknown'	HORVU3Hr1G087480,4	11.2467	1.02592e-190	' no hits & (original description: no original description)'
'35.2'	'not assigned.unknown'	HORVU3Hr1G093270,1	10.7202	5.95962e-138	' (original description: no original description)'
'35.2'	'not assigned.unknown'	HORVU3Hr1G098920,5	9.25503	1.33797e-42	' (original description: no original description)'
'35.2'	'not assigned.unknown'	HORVU4Hr1G002500,8	9.41785	4.49306e-40	' no hits & (original description: no original description)'
'35.2'	'not assigned.unknown'	HORVU4Hr1G002890,6	9.08481	3.50202e-36	'(loc_os03g46310.1 : 172.0) no description available & (at3g56210 : 130.0) ARM repeat superfamily protein; FUNCTIONS IN: binding; INVOLVED IN: biological_process unknown; CONTAINS InterPro DOMAIN/s: Armadillo-type fold (InterPro:IPR016024). & (reliability: 260.0) & (original description: no original description)'
'35.2'	'not assigned.unknown'	HORVU4Hr1G008990,1	12.7692	0	'(loc_os03g51350.1 : 208.0) no description available & (at5g66780 : 94.4) unknown protein; Has 1807 Blast hits to 1807 proteins in 277 species: Archae - 0; Bacteria - 0; Metazoa - 736; Fungi - 347; Plants - 385; Viruses - 0; Other Eukaryotes - 339 (source: NCBI BLink). & (reliability: 188.8) & (original description: no original description)'
'35.2'	'not assigned.unknown'	HORVU4Hr1G011020,5	9.39446	1.24197e-54	' no hits & (original description: no original description)'
'35.2'	'not assigned.unknown'	HORVU4Hr1G016460,1	8.93664	6.6829e-21	'(loc_os10g14020.1 : 128.0) no description available & (at1g32583 : 100.0) FUNCTIONS IN: molecular_function unknown; INVOLVED IN: biological_process unknown; LOCATED IN: endomembrane system; BEST Arabidopsis thaliana protein match is: tapetum determinant 1 (TAIR:AT4G24972.1); Has 35333 Blast hits to 34131 proteins in 2444 species: Archae - 798; Bacteria - 22429; Metazoa - 974; Fungi - 991; Plants…
'35.2'	'not assigned.unknown'	HORVU4Hr1G055960,1	8.91289	3.66292e-140	' (original description: no original description)'
'35.2'	'not assigned.unknown'	HORVU5Hr1G010560,1	8.87036	2.70924e-15	' no hits & (original description: no original description)'
'35.2'	'not assigned.unknown'	HORVU5Hr1G023720,12	9.46964	1.02207e-56	' (original description: no original description)'
'35.2'	'not assigned.unknown'	HORVU5Hr1G054690,1	9.25267	2.27042e-23	' no hits & (original description: no original description)'
'35.2'	'not assigned.unknown'	HORVU5Hr1G058330,1	9.17493	2.85078e-68	' (original description: no original description)'
'35.2'	'not assigned.unknown'	HORVU5Hr1G073690,1	9.28771	6.49948e-36	'(loc_os07g02850.1 : 145.0) no description available & (at5g46230 : 85.5) Protein of unknown function, DUF538; CONTAINS InterPro DOMAIN/s: Protein of unknown function DUF538 (InterPro:IPR007493); BEST Arabidopsis thaliana protein match is: Protein of unknown function, DUF538 (TAIR:AT1G09310.1); Has 30201 Blast hits to 17322 proteins in 780 species: Archae - 12; Bacteria - 1396; Metazoa - 17338; F…
'35.2'	'not assigned.unknown'	HORVU5Hr1G078160,7	8.96	4.49208e-52	' (original description: no original description)'
'35.2'	'not assigned.unknown'	HORVU5Hr1G083320,1	11.7241	1.32531e-64	' no hits & (original description: no original description)'
'35.2'	'not assigned.unknown'	HORVU5Hr1G083330,1	10.3365	5.7895e-57	' (original description: no original description)'
'35.2'	'not assigned.unknown'	HORVU5Hr1G112610,1	13.7151	0	' (original description: no original description)'
'35.2'	'not assigned.unknown'	HORVU6Hr1G006840,3	8.89482	4.24544e-09	' (original description: no original description)'
'35.2'	'not assigned.unknown'	HORVU6Hr1G011050,1	12.5152	0	' no hits & (original description: no original description)'
'35.2'	'not assigned.unknown'	HORVU6Hr1G014860,4	9.13443	2.93174e-33	'(loc_os02g03470.1 : 411.0) no description available & (at3g04830 : 329.0) Protein prenylyltransferase superfamily protein; FUNCTIONS IN: binding; INVOLVED IN: biological_process unknown; LOCATED IN: cellular_component unknown; EXPRESSED IN: 23 plant structures; EXPRESSED DURING: 13 growth stages; CONTAINS InterPro DOMAIN/s: Tetratricopeptide-like helical (InterPro:IPR011990), Tetratricopeptide r…
'35.2'	'not assigned.unknown'	HORVU6Hr1G069150,2	8.87652	8.65412e-15	'(loc_os12g20310.2 : 156.0) no description available & (at4g14385 : 112.0) FUNCTIONS IN: molecular_function unknown; INVOLVED IN: biological_process unknown; LOCATED IN: vacuole; EXPRESSED IN: 24 plant structures; EXPRESSED DURING: 15 growth stages; CONTAINS InterPro DOMAIN/s: Histone H4 acetyltransferase, NuA4 complex, Eaf6 (InterPro:IPR015418); Has 35333 Blast hits to 34131 proteins in 2444 spe…
'35.2'	'not assigned.unknown'	HORVU6Hr1G078950,3	12.0529	0	' (original description: no original description)'
'35.2'	'not assigned.unknown'	HORVU6Hr1G083960,2	10.3859	4.9702e-262	' (original description: no original description)'
'35.2'	'not assigned.unknown'	HORVU6Hr1G084070,1	9.26217	0	' (original description: no original description)'
'35.2'	'not assigned.unknown'	HORVU6Hr1G093260,1	9.4613	0	' (original description: no original description)'
'35.2'	'not assigned.unknown'	HORVU7Hr1G034860,7	9.37287	1.11536e-19	'(loc_os06g10440.1 : 257.0) no description available & (at2g41945 : 188.0) unknown protein; FUNCTIONS IN: molecular_function unknown; INVOLVED IN: biological_process unknown; LOCATED IN: membrane; BEST Arabidopsis thaliana protein match is: unknown protein (TAIR:AT5G18250.1); Has 57 Blast hits to 57 proteins in 12 species: Archae - 0; Bacteria - 0; Metazoa - 0; Fungi - 0; Plants - 57; Viruses - 0…
'35.2'	'not assigned.unknown'	HORVU7Hr1G036970,1	10.5488	1.22187e-104	' no hits & (original description: no original description)'
'35.2'	'not assigned.unknown'	HORVU7Hr1G056470,8	9.08215	1.13188e-133	'(loc_os08g43060.2 : 950.0) no description available & (at5g53620 : 394.0) unknown protein; INVOLVED IN: biological_process unknown; EXPRESSED IN: 23 plant structures; EXPRESSED DURING: 13 growth stages; Has 28929 Blast hits to 19542 proteins in 1425 species: Archae - 211; Bacteria - 3079; Metazoa - 14558; Fungi - 2157; Plants - 966; Viruses - 80; Other Eukaryotes - 7878 (source: NCBI BLink). & (…
'35.2'	'not assigned.unknown'	HORVU7Hr1G074520,2	9.22882	1.58982e-87	'(loc_os08g03430.2 : 462.0) no description available & (at1g67570 : 230.0) Protein of unknown function (DUF3537); CONTAINS InterPro DOMAIN/s: Protein of unknown function DUF3537 (InterPro:IPR021924); BEST Arabidopsis thaliana protein match is: Protein of unknown function (DUF3537) (TAIR:AT3G20300.1); Has 140 Blast hits to 140 proteins in 15 species: Archae - 0; Bacteria - 0; Metazoa - 0; Fungi - …
'35.2'	'not assigned.unknown'	HORVU7Hr1G086330,4	9.10066	5.72538e-13	' no hits & (original description: no original description)'
'35.2'	'not assigned.unknown'	HORVU7Hr1G088350,1	10.5859	1.63654e-168	' (original description: no original description)'
'35.2'	'not assigned.unknown'	HORVU7Hr1G100150,1	10.7254	1.51535e-50	' no hits & (original description: no original description)'
'35.2'	'not assigned.unknown'	HORVU7Hr1G108640,4	9.1472	3.70924e-51	' no hits & (original description: no original description)'
'35.2'	'not assigned.unknown'	HORVU7Hr1G116630,1	9.42724	0	' no hits & (original description: no original description)'
'35.2'	'not assigned.unknown'	HORVU0Hr1G000840,1	9.59619	2.65916e-35	' no hits & (original description: no original description)'
'35.2'	'not assigned.unknown'	HORVU1Hr1G009140,1	9.65464	3.58924e-43	' no hits & (original description: no original description)'
'35.2'	'not assigned.unknown'	HORVU1Hr1G012090,1	9.01959	0	' (original description: no original description)'
'35.2'	'not assigned.unknown'	HORVU1Hr1G084800,4	9.64746	7.97868e-55	'(loc_os05g48230.1 : 630.0) no description available & (at4g13400 : 466.0) 2-oxoglutarate (2OG) and Fe(II)-dependent oxygenase superfamily protein; BEST Arabidopsis thaliana protein match is: 2-oxoglutarate (2OG) and Fe(II)-dependent oxygenase superfamily protein (TAIR:AT3G63290.1); Has 390 Blast hits to 389 proteins in 142 species: Archae - 0; Bacteria - 106; Metazoa - 14; Fungi - 122; Plants - …
'35.2'	'not assigned.unknown'	HORVU2Hr1G016250,18	10.2252	1.13778e-131	' (original description: no original description)'
'35.2'	'not assigned.unknown'	HORVU2Hr1G028660,3	9.98854	7.6849e-298	' (original description: no original description)'
'35.2'	'not assigned.unknown'	HORVU2Hr1G083430,5	9.9263	1.46073e-43	' (original description: no original description)'
'35.2'	'not assigned.unknown'	HORVU2Hr1G112060,1	9.66534	2.08834e-48	' no hits & (original description: no original description)'
'35.2'	'not assigned.unknown'	HORVU3Hr1G003980,2	9.57554	8.49108e-59	' (original description: no original description)'
'35.2'	'not assigned.unknown'	HORVU3Hr1G030970,1	10.0967	6.78436e-66	'(loc_os11g38220.1 : 180.0) no description available & (at1g09310 : 115.0) Protein of unknown function, DUF538; INVOLVED IN: biological_process unknown; LOCATED IN: apoplast; EXPRESSED IN: 22 plant structures; EXPRESSED DURING: 14 growth stages; CONTAINS InterPro DOMAIN/s: Protein of unknown function DUF538 (InterPro:IPR007493); BEST Arabidopsis thaliana protein match is: Protein of unknown funct…
'35.2'	'not assigned.unknown'	HORVU3Hr1G069010,2	10.2192	4.62408e-133	' (original description: no original description)'
'35.2'	'not assigned.unknown'	HORVU3Hr1G085690,4	9.54689	6.88584e-47	' (original description: no original description)'
'35.2'	'not assigned.unknown'	HORVU4Hr1G000020,2	9.99152	1.82974e-52	' (original description: no original description)'
'35.2'	'not assigned.unknown'	HORVU4Hr1G017260,2	10.2408	1.23943e-71	' no hits & (original description: no original description)'
'35.2'	'not assigned.unknown'	HORVU4Hr1G059280,1	9.71081	5.18526e-16	'(loc_os08g29600.1 : 135.0) no description available & (at2g21820 : 83.6) unknown protein; Has 45 Blast hits to 45 proteins in 13 species: Archae - 0; Bacteria - 0; Metazoa - 0; Fungi - 0; Plants - 45; Viruses - 0; Other Eukaryotes - 0 (source: NCBI BLink). & (reliability: 167.2) & (original description: no original description)'
'35.2'	'not assigned.unknown'	HORVU4Hr1G069260,2	10.196	2.11058e-193	' no hits & (original description: no original description)'
'35.2'	'not assigned.unknown'	HORVU5Hr1G023730,4	9.59059	5.05298e-57	' (original description: no original description)'
'35.2'	'not assigned.unknown'	HORVU5Hr1G067280,11	9.69523	3.85472e-110	' (original description: no original description)'
'35.2'	'not assigned.unknown'	HORVU5Hr1G073650,1	9.71425	9.19858e-49	'(loc_os07g02850.1 : 146.0) no description available & (at1g09310 : 85.1) Protein of unknown function, DUF538; INVOLVED IN: biological_process unknown; LOCATED IN: apoplast; EXPRESSED IN: 22 plant structures; EXPRESSED DURING: 14 growth stages; CONTAINS InterPro DOMAIN/s: Protein of unknown function DUF538 (InterPro:IPR007493); BEST Arabidopsis thaliana protein match is: Protein of unknown functi…
'35.2'	'not assigned.unknown'	HORVU5Hr1G092100,1	9.69	1.51535e-50	' no hits & (original description: no original description)'
'35.2'	'not assigned.unknown'	HORVU6Hr1G000960,2	9.73471	9.66256e-56	' (original description: no original description)'
'35.2'	'not assigned.unknown'	HORVU6Hr1G073540,1	9.75154	1.41042e-68	' no hits & (original description: no original description)'
'35.2'	'not assigned.unknown'	HORVU7Hr1G003170,1	9.75822	3.70924e-51	' (original description: no original description)'
'35.2'	'not assigned.unknown'	HORVU7Hr1G118570,3	9.73132	2.09548e-101	' (original description: no original description)'

## Sheet: C3-21 7DAP_downregulated
List of downregulated genes identified in 7DAP spikes of ckx3 mutant line C1-21. Functional annotation was performed using Mercator sequence annotation tool.
BINCODE	NAME	IDENTIFIER	Log2 fold change	Pvalue	DESCRIPTION
'1.1.1.1'	'PS.lightreaction.photosystem II.LHC-II'	HORVU2Hr1G040780,6	-9.91886	1.76758e-67	'(p27523|cb23_horvu : 549.0) Chlorophyll a-b binding protein of LHCII type III, chloroplast precursor (CAB) - Hordeum vulgare (Barley) & (loc_os07g37550.1 : 480.0) no description available & (at5g54270 : 472.0) Lhcb3 protein is a component of the main light harvesting chlorophyll a/b-protein complex of Photosystem II (LHC II).; light-harvesting chlorophyll B-binding protein 3 (LHCB3); FUNCTIONS I…
'1.1.1.2'	'PS.lightreaction.photosystem II.PSII polypeptide subunits'	HORVU4Hr1G050630,7	-10.5275	2.35418e-104	'(loc_os03g21560.1 : 186.0) no description available & (at1g03600 : 169.0) PSB27; FUNCTIONS IN: molecular_function unknown; INVOLVED IN: photosystem II repair; LOCATED IN: thylakoid, chloroplast thylakoid membrane, chloroplast thylakoid lumen, chloroplast photosystem II, chloroplast; EXPRESSED IN: 23 plant structures; EXPRESSED DURING: 13 growth stages; Has 273 Blast hits to 273 proteins in 82 sp…
'1.1.30'	'PS.lightreaction.state transition'	HORVU2Hr1G075030,4	-10.4019	4.05138e-172	'(loc_os04g35080.1 : 462.0) no description available & (at1g01540 : 403.0) Protein kinase superfamily protein; FUNCTIONS IN: protein serine/threonine kinase activity, protein kinase activity, kinase activity, ATP binding; INVOLVED IN: protein amino acid phosphorylation; LOCATED IN: plasma membrane; EXPRESSED IN: 23 plant structures; EXPRESSED DURING: 13 growth stages; CONTAINS InterPro DOMAIN/s: …
'1.1.4.2'	'PS.lightreaction.ATP synthase.beta subunit'	HORVU1Hr1G083840,10	-9.20945	1.68542e-76	'(p38482|atpbm_chlre : 87.0) ATP synthase subunit beta, mitochondrial precursor (EC 3.6.3.14) - Chlamydomonas reinhardtii & (at5g08680 : 85.5) Encodes the mitochondrial ATP synthase beta-subunit. This subunit is encoded by a multigene family of three members (At5g08670, At5g08680, At5g08690) that shared 98% sequence identity at the amino acid level.; ATP synthase alpha/beta family protein; FUNCTI…
'1.3.13'	'PS.calvin cycle.rubisco interacting'	HORVU1Hr1G093250,5	-8.43879	5.35406e-32	'(loc_os05g50980.1 : 399.0) no description available & (at4g20130 : 343.0) plastid transcriptionally active 14 (PTAC14); LOCATED IN: plastid chromosome, chloroplast, nucleoid; EXPRESSED IN: 22 plant structures; EXPRESSED DURING: 13 growth stages; CONTAINS InterPro DOMAIN/s: SET domain (InterPro:IPR001214), Rubisco LSMT substrate-binding (InterPro:IPR015353); BEST Arabidopsis thaliana protein matc…
'1.3.13'	'PS.calvin cycle.rubisco interacting'	HORVU2Hr1G007840,6	-9.27612	3.19356e-115	'(loc_os12g17910.1 : 763.0) no description available & (p08823|ruba_wheat : 738.0) RuBisCO large subunit-binding protein subunit alpha, chloroplast precursor (60 kDa chaperonin subunit alpha) (CPN-60 alpha) (Fragment) - Triticum aestivum (Wheat) & (at2g28000 : 664.0) Encodes chaperonin-60 alpha, a molecular chaperone involved in Rubisco folding. Mutants display aberrant chloroplast and embryo dev…
'1.3.13'	'PS.calvin cycle.rubisco interacting'	HORVU2Hr1G007840,9	-8.74315	4.15756e-156	'(loc_os12g17910.1 : 763.0) no description available & (p08823|ruba_wheat : 738.0) RuBisCO large subunit-binding protein subunit alpha, chloroplast precursor (60 kDa chaperonin subunit alpha) (CPN-60 alpha) (Fragment) - Triticum aestivum (Wheat) & (at2g28000 : 664.0) Encodes chaperonin-60 alpha, a molecular chaperone involved in Rubisco folding. Mutants display aberrant chloroplast and embryo dev…
'1.3.2'	'PS.calvin cycle.rubisco small subunit'	HORVU2Hr1G010690,13	-10.1649	2.6459e-78	'(p00871|rbs1_wheat : 321.0) Ribulose bisphosphate carboxylase small chain PWS4.3, chloroplast precursor (EC 4.1.1.39) (RuBisCO small subunit PWS4.3) - Triticum aestivum (Wheat) & (loc_os12g17600.1 : 284.0) no description available & (at1g67090 : 221.0) ribulose bisphosphate carboxylase small chain 1A (RBCS1A); FUNCTIONS IN: ribulose-bisphosphate carboxylase activity, copper ion binding; INVOLVED…
'2.1.1.3'	'major CHO metabolism.synthesis.sucrose.FBPase'	HORVU3Hr1G083350,4	-9.16491	5.35406e-32	'(loc_os01g64660.1 : 532.0) no description available & (o64421|f16p2_orysa : 527.0) Fructose-1,6-bisphosphatase, cytosolic (EC 3.1.3.11) (D-fructose-1,6-bisphosphate 1-phosphohydrolase) (FBPase) - Oryza sativa (Rice) & (at1g43670 : 483.0) Inositol monophosphatase family protein; FUNCTIONS IN: fructose 1,6-bisphosphate 1-phosphatase activity, phosphoric ester hydrolase activity; INVOLVED IN: carbo…
'2.1.2.3'	'major CHO metabolism.synthesis.starch.starch branching'	HORVU2Hr1G072500,34	-9.63118	2.66208e-152	'(q08047|glgb_maize : 1134.0) 1,4-alpha-glucan branching enzyme IIB, chloroplast precursor (EC 2.4.1.18) (Starch branching enzyme IIB) (Q-enzyme) - Zea mays (Maize) & (loc_os02g32660.1 : 1129.0) no description available & (at5g03650 : 1102.0) Encodes starch branching enzyme (E.C.2.4.1.18) similar to SBE2 from maize and rice. Expressed throughout the plant and highest in seedlings and cauline leav…
'2.2.1.3.3'	'major CHO metabolism.degradation.sucrose.invertases.vacuolar'	HORVU0Hr1G018850,5	-8.25739	1.08658e-52	'(loc_os02g01590.1 : 695.0) no description available & (p80065|invb_dauca : 613.0) Beta-fructofuranosidase, soluble isoenzyme I precursor (EC 3.2.1.26) (Sucrose hydrolase) (Invertase) (Saccharase) - Daucus carota (Carrot) & (at1g12240 : 547.0) ATBETAFRUCT4; FUNCTIONS IN: hydrolase activity, hydrolyzing O-glycosyl compounds, beta-fructofuranosidase activity; INVOLVED IN: sucrose catabolic process,…
'2.2.2.1'	'major CHO metabolism.degradation.starch.starch cleavage'	HORVU1Hr1G057330,19	-8.50779	6.36116e-80	'(loc_os07g23880.1 : 648.0) no description available & (at3g23640 : 464.0) heteroglycan glucosidase 1 (HGL1); FUNCTIONS IN: hydrolase activity, hydrolyzing O-glycosyl compounds; INVOLVED IN: carbohydrate metabolic process; LOCATED IN: chloroplast; EXPRESSED IN: 22 plant structures; EXPRESSED DURING: 13 growth stages; CONTAINS InterPro DOMAIN/s: Glycoside hydrolase, family 31 (InterPro:IPR000322),…
'2.2.2.1'	'major CHO metabolism.degradation.starch.starch cleavage'	HORVU1Hr1G057330,7	-8.21432	1.9819e-89	'(loc_os07g23880.1 : 648.0) no description available & (at3g23640 : 464.0) heteroglycan glucosidase 1 (HGL1); FUNCTIONS IN: hydrolase activity, hydrolyzing O-glycosyl compounds; INVOLVED IN: carbohydrate metabolic process; LOCATED IN: chloroplast; EXPRESSED IN: 22 plant structures; EXPRESSED DURING: 13 growth stages; CONTAINS InterPro DOMAIN/s: Glycoside hydrolase, family 31 (InterPro:IPR000322),…
'2.2.2.1.1'	'major CHO metabolism.degradation.starch.starch cleavage.alpha amylase'	HORVU3Hr1G067620,3	-8.2854	2.68822e-75	'(loc_os01g51754.1 : 1043.0) no description available & (at1g69830 : 1033.0) Encodes a plastid-localized &#945;-amylase. Expression is reduced in the SEX4 mutant. Loss of function mutations show normal diurnal pattern of starch accumulation/degradation. Expression follows circadian rhythms.; alpha-amylase-like 3 (AMY3); FUNCTIONS IN: alpha-amylase activity; INVOLVED IN: circadian rhythm, starch c…
'3.5'	'minor CHO metabolism.others'	HORVU1Hr1G090020,1	-9.11634	9.57506e-53	'(loc_os05g49430.1 : 528.0) no description available & (at3g61610 : 459.0) Galactose mutarotase-like superfamily protein; FUNCTIONS IN: carbohydrate binding, isomerase activity, aldose 1-epimerase activity, catalytic activity; INVOLVED IN: galactose metabolic process, N-terminal protein myristoylation, carbohydrate metabolic process; LOCATED IN: cellular_component unknown; EXPRESSED IN: 17 plant …
'3.5'	'minor CHO metabolism.others'	HORVU1Hr1G090020,8	-8.31288	8.1427e-40	'(loc_os05g49430.1 : 528.0) no description available & (at3g61610 : 459.0) Galactose mutarotase-like superfamily protein; FUNCTIONS IN: carbohydrate binding, isomerase activity, aldose 1-epimerase activity, catalytic activity; INVOLVED IN: galactose metabolic process, N-terminal protein myristoylation, carbohydrate metabolic process; LOCATED IN: cellular_component unknown; EXPRESSED IN: 17 plant …
'3.5'	'minor CHO metabolism.others'	HORVU5Hr1G026730,7	-8.55075	4.31676e-65	'(loc_os11g29370.1 : 243.0) no description available & (at5g53850 : 196.0) haloacid dehalogenase-like hydrolase family protein; FUNCTIONS IN: hydrolase activity, ion binding, methylthioribulose 1-phosphate dehydratase activity, metal ion binding; INVOLVED IN: L-methionine salvage; LOCATED IN: chloroplast; EXPRESSED IN: 23 plant structures; EXPRESSED DURING: 13 growth stages; CONTAINS InterPro DOM…
'3.5'	'minor CHO metabolism.others'	HORVU1Hr1G038990,26	-8.23362	3.25198e-39	'(loc_os10g32830.1 : 320.0) no description available & (at4g28706 : 179.0) pfkB-like carbohydrate kinase family protein; FUNCTIONS IN: kinase activity, ribokinase activity; INVOLVED IN: D-ribose metabolic process; EXPRESSED IN: 21 plant structures; EXPRESSED DURING: 13 growth stages; CONTAINS InterPro DOMAIN/s: Carbohydrate/purine kinase (InterPro:IPR011611), Ribokinase (InterPro:IPR002139), Carb…
'3.6'	'minor CHO metabolism.callose'	HORVU4Hr1G085510,41	-9.62571	4.22018e-77	'(loc_os03g02756.1 : 592.0) no description available & (at3g07160 : 506.0) Encodes GSL10, a member of the Glucan Synthase-Like (GSL) family believed to be involved in the synthesis of the cell wall component callose. GSL10 is required for male gametophyte development and plant growth. Has a role in entry of microspores into mitosis. GSL10 mutation leads to perturbation of microspore division symm…
'3.8.2'	'minor CHO metabolism.galactose.alpha-galactosidases'	HORVU1Hr1G043820,10	-9.10329	1.90656e-51	'(q9fxt4|agal_orysa : 480.0) Alpha-galactosidase precursor (EC 3.2.1.22) (Melibiase) (Alpha-D-galactoside galactohydrolase) - Oryza sativa (Rice) & (loc_os10g35110.2 : 480.0) no description available & (at5g08370 : 395.0) alpha-galactosidase 2 (AGAL2); FUNCTIONS IN: alpha-galactosidase activity, hydrolase activity, hydrolyzing O-glycosyl compounds, catalytic activity; INVOLVED IN: positive regula…
'4.1.14'	'glycolysis.cytosolic branch.pyruvate kinase (PK)'	HORVU4Hr1G016520,11	-8.27146	1.18082e-56	'(loc_os11g10980.1 : 596.0) no description available & (at2g36580 : 434.0) Pyruvate kinase family protein; FUNCTIONS IN: pyruvate kinase activity, potassium ion binding, magnesium ion binding, catalytic activity; INVOLVED IN: glycolysis; LOCATED IN: plasma membrane; EXPRESSED IN: guard cell; CONTAINS InterPro DOMAIN/s: Pyruvate/Phosphoenolpyruvate kinase, catalytic core (InterPro:IPR015813), Pyru…
'4.1.14'	'glycolysis.cytosolic branch.pyruvate kinase (PK)'	HORVU5Hr1G041120,7	-9.25267	1.58179e-88	'(loc_os11g05110.2 : 979.0) no description available & (at3g52990 : 910.0) Pyruvate kinase family protein; FUNCTIONS IN: pyruvate kinase activity, magnesium ion binding, potassium ion binding, catalytic activity; INVOLVED IN: glycolysis; LOCATED IN: membrane; EXPRESSED IN: guard cell, cultured cell, leaf; CONTAINS InterPro DOMAIN/s: Pyruvate/Phosphoenolpyruvate kinase, catalytic core (InterPro:IP…
'4.1.15'	'glycolysis.cytosolic branch.phospho-enol-pyruvate carboxylase (PEPC)'	HORVU6Hr1G048410,5	-8.93074	5.5831e-155	'(loc_os02g14770.3 : 1659.0) no description available & (p29195|capp1_sorbi : 1647.0) Phosphoenolpyruvate carboxylase 1 (EC 4.1.1.31) (PEPCase 1) (PEPC 1) (CP21) - Sorghum bicolor (Sorghum) (Sorghum vulgare) & (at3g14940 : 1474.0) Encodes a cytosolic phosphoenolpyruvate carboxylase (PEPC) that has activity when expressed in E.coli. Its mRNA is most abundantly expressed in roots and siliques. PPC3…
'4.1.4'	'glycolysis.cytosolic branch.phosphofructokinase (PFK)'	HORVU1Hr1G075550,8	-9.74483	1.14782e-105	'(loc_os05g44922.1 : 702.0) no description available & (at4g26270 : 533.0) phosphofructokinase 3 (PFK3); CONTAINS InterPro DOMAIN/s: Pyrophosphate-dependent phosphofructokinase TP0108 (InterPro:IPR012004), Phosphofructokinase (InterPro:IPR000023); BEST Arabidopsis thaliana protein match is: phosphofructokinase 7 (TAIR:AT5G56630.1); Has 30201 Blast hits to 17322 proteins in 780 species: Archae - 1…
'4.2.14'	'glycolysis.plastid branch.pyruvate kinase (PK)'	HORVU3Hr1G059470,20	-9.73809	1.10821e-68	'(loc_os01g47080.1 : 614.0) no description available & (at5g52920 : 562.0) encodes a dominant chloroplast pyruvate kinase beta subunit. Important for seed oil biosynthesis. Ubiquitously expressed, with significantly increased expression in maturing seeds. The mutant plant has wrinkled seeds, with a 50-70% reduction in seed fatty acid content.; plastidic pyruvate kinase beta subunit 1 (PKP-BETA1);…
'7.3'	'OPP.electron transfer'	HORVU2Hr1G038830,8	-8.66888	4.13972e-37	'(o23877|fenr3_orysa : 324.0) Ferredoxin--NADP reductase, embryo isozyme, chloroplast precursor (EC 1.18.1.2) (FNR) - Oryza sativa (Rice) & (loc_os07g05400.1 : 324.0) no description available & (at4g05390 : 298.0) Encodes a root-type ferredoxin:NADP(H) oxidoreductase.; root FNR 1 (RFNR1); FUNCTIONS IN: oxidoreductase activity, copper ion binding; INVOLVED IN: oxidation reduction; LOCATED IN: chlo…
'8.1.1.2'	'TCA / org transformation.TCA.pyruvate DH.E2'	HORVU7Hr1G001330,8	-8.59991	2.5461e-71	'(loc_os06g01630.1 : 743.0) no description available & (at3g13930 : 556.0) Dihydrolipoamide acetyltransferase, long form protein; FUNCTIONS IN: dihydrolipoyllysine-residue acetyltransferase activity, copper ion binding; INVOLVED IN: pyruvate metabolic process, metabolic process; LOCATED IN: mitochondrion, chloroplast, chloroplast envelope; EXPRESSED IN: 25 plant structures; EXPRESSED DURING: 13 g…
'8.1.4'	'TCA / org transformation.TCA.IDH'	HORVU3Hr1G059060,10	-10.6768	1.14448e-181	'(loc_os01g46610.1 : 791.0) no description available & (at1g65930 : 744.0) Encodes a NADP+-isocitrate dehydrogenase that is believed to function in the cytosol. It appears to contribute to NADPH production under oxidative stress, and thereby to participate in redox signalling linked to defense responses.; cytosolic NADP+-dependent isocitrate dehydrogenase (cICDH); FUNCTIONS IN: isocitrate dehydro…
'8.2.11'	'TCA / org transformation.other organic acid transformatons.atp-citrate lyase'	HORVU3Hr1G040360,15	-9.19722	1.35275e-117	'(loc_os01g19450.2 : 717.0) no description available & (at5g49460 : 687.0) One of the two genes encoding subunit B of the cytosolic enzyme ATP Citrate Lyase (ACL); ATP citrate lyase subunit B 2 (ACLB-2); FUNCTIONS IN: ATP citrate synthase activity; INVOLVED IN: acetyl-CoA biosynthetic process; LOCATED IN: cytosol, citrate lyase complex, plasma membrane; EXPRESSED IN: 24 plant structures; EXPRESSE…
'9.7'	'mitochondrial electron transport / ATP synthesis.cytochrome c oxidase'	HORVU7Hr1G020720,11	-9.23601	1.46154e-29	'(loc_os06g05080.1 : 208.0) no description available & (at3g15640 : 169.0) Rubredoxin-like superfamily protein; CONTAINS InterPro DOMAIN/s: Cytochrome c oxidase, subunit Vb (InterPro:IPR002124); BEST Arabidopsis thaliana protein match is: Rubredoxin-like superfamily protein (TAIR:AT1G80230.1); Has 464 Blast hits to 464 proteins in 159 species: Archae - 0; Bacteria - 0; Metazoa - 230; Fungi - 86; …
'10.1.30.1'	'cell wall.precursor synthesis.sugar kinases.galacturonic acid kinase'	HORVU2Hr1G100380,1	-8.66534	2.47482e-47	'(loc_os04g51880.2 : 672.0) no description available & (at3g10700 : 456.0) Encodes a GHMP kinase family protein that acts as a galacturonic acid-1-phosphate kinase that catalyzes the production of galacturonic acid-1-phosphate. This is a precursor of the important cell wall building block UDP-galacturonic acid. Based on gene trap line GT8007, the gene appears to be expressed in a petal and stamen…
'10.2'	'cell wall.cellulose synthesis'	HORVU6Hr1G034630,1	-8.72792	1.50317e-54	'(loc_os02g09930.1 : 548.0) no description available & (at5g22740 : 456.0) encodes a beta-mannan synthase based on in vitro enzyme assays from heterologously expressed protein; cellulose synthase-like A02 (CSLA02); CONTAINS InterPro DOMAIN/s: Glycosyl transferase, family 2 (InterPro:IPR001173); BEST Arabidopsis thaliana protein match is: Nucleotide-diphospho-sugar transferases superfamily protein…
'10.2.2'	'cell wall.cellulose synthesis.COBRA'	HORVU2Hr1G033070,5	-9.85798	2.02042e-129	'(q6z4g8|cobl1_orysa : 372.0) COBRA-like 1 protein precursor (BRITTLE CULM1-like 6 protein) - Oryza sativa (Rice) & (loc_os07g41310.1 : 372.0) no description available & (at5g60920 : 358.0) Encodes a glycosylphosphatidylinositol-anchored protein localized primarily in the plasma membrane of the longitudinal sides of root cells. Necessary for oriented cell expansion in Arabidopsis. Cob mutants hav…
'10.4.1.1'	'cell wall.pectin synthesis.homogalacturonan.Galacturonic Acid Trnasferase'	HORVU4Hr1G004440,15	-8.30378	4.2961e-55	'(loc_os06g49810.1 : 451.0) no description available & (at3g61130 : 397.0) Encodes a protein with putative galacturonosyltransferase activity.; galacturonosyltransferase 1 (GAUT1); CONTAINS InterPro DOMAIN/s: Glycosyl transferase, family 8 (InterPro:IPR002495); BEST Arabidopsis thaliana protein match is: galacturonosyltransferase 3 (TAIR:AT4G38270.2); Has 1521 Blast hits to 1503 proteins in 273 s…
'10.5.3'	'cell wall.cell wall proteins.LRR'	HORVU1Hr1G026650,4	-9.67243	2.79254e-101	'(loc_os05g08770.1 : 577.0) no description available & (at4g13340 : 449.0) Leucine-rich repeat (LRR) family protein; FUNCTIONS IN: structural constituent of cell wall; LOCATED IN: cell wall, plant-type cell wall; EXPRESSED IN: 23 plant structures; EXPRESSED DURING: 13 growth stages; CONTAINS InterPro DOMAIN/s: Leucine-rich repeat-containing N-terminal domain, type 2 (InterPro:IPR013210); BEST Ara…
'10.7'	'cell wall.modification'	HORVU6Hr1G067470,3	-8.53138	2.4567e-52	'(loc_os02g46910.1 : 444.0) no description available & (at1g32170 : 289.0) xyloglucan endotransglycosylase-related protein (XTR4); xyloglucan endotransglucosylase/hydrolase 30 (XTH30); FUNCTIONS IN: hydrolase activity, acting on glycosyl bonds, xyloglucan:xyloglucosyl transferase activity, hydrolase activity, hydrolyzing O-glycosyl compounds; INVOLVED IN: carbohydrate metabolic process, cellular …
'10.8.99'	'cell wall.pectin*esterases.misc'	HORVU7Hr1G071750,9	-9.42836	9.30748e-102	'(loc_os08g05820.1 : 181.0) no description available & (at5g48450 : 136.0) Encodes a protein with two DUF26 domains and a signal peptide for secretion. The protein is transported to the apoplast when it is expressed as a GFP fusion protein.; SKU5 similar 3 (sks3); FUNCTIONS IN: oxidoreductase activity, copper ion binding; INVOLVED IN: oxidation reduction; LOCATED IN: plasma membrane; EXPRESSED IN…
'11.1.9'	'lipid metabolism.FA synthesis and FA elongation.long chain fatty acid CoA ligase'	HORVU1Hr1G016200,17	-8.51175	1.76758e-67	'(loc_os05g04170.1 : 608.0) no description available & (at2g47240 : 464.0) Encodes an acyl-CoA synthetase that acts on long-chain and very-long-chain fatty acids, involved in cuticular wax and cutin biosynthesis; LONG-CHAIN ACYL-COA SYNTHASE 1 (LACS1); FUNCTIONS IN: long-chain fatty acid-CoA ligase activity, very long-chain fatty acid-CoA ligase activity; INVOLVED IN: fatty acid biosynthetic proc…
'11.6'	'lipid metabolism.lipid transfer proteins etc'	HORVU0Hr1G016430,3	-9.03067	5.52668e-26	'(loc_os07g09970.1 : 129.0) no description available & (at2g44300 : 110.0) Bifunctional inhibitor/lipid-transfer protein/seed storage 2S albumin superfamily protein; FUNCTIONS IN: lipid binding; INVOLVED IN: lipid transport; LOCATED IN: plasma membrane, anchored to membrane; EXPRESSED IN: 21 plant structures; EXPRESSED DURING: 13 growth stages; CONTAINS InterPro DOMAIN/s: Bifunctional inhibitor/p…
'11.8.1.3'	'lipid metabolism.''exotics'' (steroids, squalene etc).sphingolipids.ceramide glucosyltransferase'	HORVU5Hr1G035030,2	-8.94837	9.4879e-25	'(at2g19880 : 89.4) Nucleotide-diphospho-sugar transferases superfamily protein; FUNCTIONS IN: ceramide glucosyltransferase activity; INVOLVED IN: biological_process unknown; LOCATED IN: endomembrane system; EXPRESSED IN: 24 plant structures; EXPRESSED DURING: 15 growth stages; CONTAINS InterPro DOMAIN/s: Glycosyl transferase, family 2 (InterPro:IPR001173). & (loc_os01g67870.1 : 86.3) no descript…
'11.8.1.3'	'lipid metabolism.''exotics'' (steroids, squalene etc).sphingolipids.ceramide glucosyltransferase'	HORVU5Hr1G035030,1	-8.94837	9.4879e-25	'(at2g19880 : 89.4) Nucleotide-diphospho-sugar transferases superfamily protein; FUNCTIONS IN: ceramide glucosyltransferase activity; INVOLVED IN: biological_process unknown; LOCATED IN: endomembrane system; EXPRESSED IN: 24 plant structures; EXPRESSED DURING: 15 growth stages; CONTAINS InterPro DOMAIN/s: Glycosyl transferase, family 2 (InterPro:IPR001173). & (loc_os01g67870.1 : 86.3) no descript…
'11.9.2'	'lipid metabolism.lipid degradation.lipases'	HORVU7Hr1G079810,1	-9.72792	5.9489e-143	'(loc_os06g34120.1 : 179.0) no description available & (at1g28610 : 110.0) GDSL-like Lipase/Acylhydrolase superfamily protein; FUNCTIONS IN: lipase activity, hydrolase activity, acting on ester bonds, carboxylesterase activity; INVOLVED IN: lipid metabolic process; LOCATED IN: endomembrane system; EXPRESSED IN: 22 plant structures; EXPRESSED DURING: 13 growth stages; CONTAINS InterPro DOMAIN/s: L…
'11.9.4.2'	'lipid metabolism.lipid degradation.beta-oxidation.acyl CoA DH'	HORVU1Hr1G024240,10	-10.1344	1.98226e-164	'(loc_os05g07090.1 : 788.0) no description available & (at3g51840 : 686.0) Encodes a short-chain acyl-CoA oxidase, which catalyzes the first step of peroxisomal fatty acid beta-oxidation during early, post-germinative growth in oilseed species. Null mutants virtually lack short-chain acyl-CoA and are resistant to 2,4-dichlorophenoxybutyric acid, which is converted to the herbicide and auxin analo…
'11.9.4.9'	'lipid metabolism.lipid degradation.beta-oxidation.multifunctional'	HORVU6Hr1G024100,6	-9.58308	1.61988e-154	'(q8w1l6|mfp_orysa : 1204.0) Peroxisomal fatty acid beta-oxidation multifunctional protein (MFP) [Includes: Enoyl-CoA hydratase (EC 4.2.1.17); 3-2-trans-enoyl-CoA isomerase (EC 5.3.3.8); 3-hydroxybutyryl-CoA epimerase (EC 5.1.2.3); 3-hydroxyacyl-CoA dehydrogenase (E & (loc_os02g17390.1 : 1204.0) no description available & (at4g29010 : 930.0) Functions in beta-oxidation of fatty acids, similar to …
'13'	'amino acid metabolism'	HORVU5Hr1G042310,2	-8.39232	3.35682e-33	'(loc_os12g05650.1 : 254.0) no description available & (at5g04740 : 223.0) ACT domain-containing protein; FUNCTIONS IN: amino acid binding; INVOLVED IN: metabolic process; LOCATED IN: chloroplast thylakoid membrane; EXPRESSED IN: 22 plant structures; EXPRESSED DURING: 13 growth stages; CONTAINS InterPro DOMAIN/s: Amino acid-binding ACT (InterPro:IPR002912); BEST Arabidopsis thaliana protein match…
'13.1.1.1.1'	'amino acid metabolism.synthesis.central amino acid metabolism.GABA.Glutamate decarboxylase'	HORVU4Hr1G008700,6	-9.83289	2.45242e-136	'(loc_os03g51080.1 : 660.0) no description available & (at5g17330 : 623.0) Encodes one of two isoforms of glutamate decarboxylase.; glutamate decarboxylase (GAD); FUNCTIONS IN: calmodulin binding, glutamate decarboxylase activity; INVOLVED IN: response to cadmium ion; EXPRESSED IN: 13 plant structures; EXPRESSED DURING: 6 growth stages; CONTAINS InterPro DOMAIN/s: Pyridoxal phosphate-dependent tr…
'13.1.2.3.4'	'amino acid metabolism.synthesis.glutamate family.arginine.acetylornithine aminotransferase'	HORVU1Hr1G015560,4	-10.2609	8.62684e-160	'(loc_os05g03830.1 : 716.0) no description available & (at1g80600 : 568.0) Encodes HopW1-1-Interacting protein 1 (WIN1). Interacts with the P. syringae effector HopW1-1. WIN1 is a putative acetylornithine transaminase. Modulates plant defenses against bacteria. Three WIN proteins are identified so far (WIN1: AT1G80600; WIN2: AT4G31750; WIN3: AT5G13320).; HOPW1-1-interacting 1 (WIN1); FUNCTIONS IN…
'13.1.3.6.1.1'	'amino acid metabolism.synthesis.aspartate family.misc.homoserine.aspartate kinase'	HORVU5Hr1G053950,5	-8.35315	7.67196e-94	'(loc_os09g12290.1 : 1504.0) no description available & (p49080|akh2_maize : 1484.0) Bifunctional aspartokinase/homoserine dehydrogenase 2, chloroplast precursor (AK-HD 2) (AK-HSDH 2) [Includes: Aspartokinase (EC 2.7.2.4); Homoserine dehydrogenase (EC 1.1.1.3)] - Zea mays (Maize) & (at4g19710 : 1272.0) Encodes a bifunctional aspartate kinase/homoserine dehydrogenase. These two activities catalyze…
'13.1.4.1.1'	'amino acid metabolism.synthesis.branched chain group.common.acetolactate synthase'	HORVU4Hr1G014750,2	-8.24793	3.70458e-58	'(loc_os11g14950.1 : 228.0) no description available & (at2g31810 : 196.0) ACT domain-containing small subunit of acetolactate synthase protein; FUNCTIONS IN: acetolactate synthase activity, amino acid binding; INVOLVED IN: branched chain family amino acid biosynthetic process; LOCATED IN: chloroplast; EXPRESSED IN: 24 plant structures; EXPRESSED DURING: 13 growth stages; CONTAINS InterPro DOMAIN…
'13.1.6.1.10'	'amino acid metabolism.synthesis.aromatic aa.chorismate.dehydroquinate/shikimate dehydrogenase'	HORVU5Hr1G026170,17	-8.99435	1.36668e-72	'(loc_os12g34874.1 : 458.0) no description available & (at3g06350 : 318.0) MATERNAL EFFECT EMBRYO ARREST 32 (MEE32); FUNCTIONS IN: NADP or NADPH binding, 3-dehydroquinate dehydratase activity, shikimate 5-dehydrogenase activity, binding, catalytic activity; INVOLVED IN: embryo development ending in seed dormancy; LOCATED IN: chloroplast stroma, chloroplast; EXPRESSED IN: 23 plant structures; EXPR…
'13.1.6.5.2'	'amino acid metabolism.synthesis.aromatic aa.tryptophan.anthranilate phosphoribosyltransferase'	HORVU4Hr1G083210,9	-9.39874	2.49346e-79	'(loc_os03g03450.1 : 546.0) no description available & (at5g17990 : 412.0) Encodes the tryptophan biosynthetic enzyme phosphoribosylanthranilate transferase (PAT1, called trpD in bacteria). Converts anthranilate and phosphoribosylpyrophosphate into phosphoribosylanthranilate and inorganic pyrophosphate.; tryptophan biosynthesis 1 (TRP1); FUNCTIONS IN: anthranilate phosphoribosyltransferase activi…
'13.1.6.5.5'	'amino acid metabolism.synthesis.aromatic aa.tryptophan.tryptophan synthase'	HORVU1Hr1G093480,5	-9.35094	4.40834e-46	'(loc_os07g08430.1 : 256.0) no description available & (at4g02610 : 216.0) Aldolase-type TIM barrel family protein; CONTAINS InterPro DOMAIN/s: Tryptophan synthase, alpha chain, active site (InterPro:IPR018204), Aldolase-type TIM barrel (InterPro:IPR013785), Ribulose-phosphate binding barrel (InterPro:IPR011060), Tryptophan synthase, alpha chain (InterPro:IPR002028); BEST Arabidopsis thaliana pro…
'13.1.6.5.5'	'amino acid metabolism.synthesis.aromatic aa.tryptophan.tryptophan synthase'	HORVU3Hr1G003410,5	-8.56605	2.10378e-46	'(loc_os03g58320.1 : 182.0) no description available & (p42390|trpa_maize : 144.0) Indole-3-glycerol phosphate lyase, chloroplast precursor (EC 4.1.2.8) (Indole synthase) (Tryptophan synthase alpha chain) (EC 4.2.1.20) (Benzoxazineless 1) - Zea mays (Maize) & (at3g54640 : 139.0) Catalyzes the conversion of indole-3-glycerolphosphate to indole, the penultimate reaction in the biosynthesis of trypt…
'13.1.6.5.5'	'amino acid metabolism.synthesis.aromatic aa.tryptophan.tryptophan synthase'	HORVU7Hr1G073460,5	-9.17742	1.10821e-68	'(p43283|trpb1_maize : 114.0) Tryptophan synthase beta chain 1 (EC 4.2.1.20) (Orange pericarp 1) (Fragment) - Zea mays (Maize) & (loc_os08g04180.1 : 113.0) no description available & (at4g27070 : 101.0) Tryptophan synthase beta. Expressed at low levels in all tissues.; tryptophan synthase beta-subunit 2 (TSB2); CONTAINS InterPro DOMAIN/s: Tryptophan synthase, beta chain (InterPro:IPR006654), Pyri…
'13.2.2.3'	'amino acid metabolism.degradation.glutamate family.arginine'	HORVU1Hr1G088140,7	-8.24793	2.2425e-22	'(loc_os05g49050.1 : 435.0) no description available & (at2g34470 : 410.0) Encodes a urease accessory protein which is essential for the activation of plant urease.; urease accessory protein G (UREG); FUNCTIONS IN: nickel ion binding, nucleotide binding, metal ion binding, ATP binding; INVOLVED IN: nitrogen compound metabolic process, positive regulation of metalloenzyme activity; LOCATED IN: mem…
'13.2.3.5.1'	'mino acid metabolism.degradation.aspartate family.lysine.lysine decarboxylase'	HORVU4Hr1G079860,6	-8.30834	2.99382e-11	'(loc_os03g01880.1 : 279.0) no description available & (at2g37210 : 242.0) Encodes a protein of unknown function. It has been crystallized and shown to be structurally almost identical to the protein encoded by At5g11950.; lysine decarboxylase family protein; FUNCTIONS IN: molecular_function unknown; INVOLVED IN: biological_process unknown; LOCATED IN: cytosol, nucleus; EXPRESSED IN: 9 plant stru…
'13.2.3.5.1'	'mino acid metabolism.degradation.aspartate family.lysine.lysine decarboxylase'	HORVU1Hr1G079570,17	-7.06609	3.0417e-08	'(loc_os01g51210.1 : 164.0) no description available & (at5g11950 : 147.0) Encodes a protein of unknown function. It has been crystallized and shown to be structurally almost identical to the protein encoded by At2G37210.; Putative lysine decarboxylase family protein; CONTAINS InterPro DOMAIN/s: Conserved hypothetical protein CHP00730 (InterPro:IPR005269); BEST Arabidopsis thaliana protein match …
'13.2.3.5.1'	'mino acid metabolism.degradation.aspartate family.lysine.lysine decarboxylase'	HORVU1Hr1G094290,2	-6.32193	1.21477e-07	'(loc_os05g51390.1 : 239.0) no description available & (at3g53450 : 183.0) Putative lysine decarboxylase family protein; FUNCTIONS IN: molecular_function unknown; INVOLVED IN: lysine biosynthetic process via diaminopimelate; LOCATED IN: cytosol, nucleus; EXPRESSED IN: 15 plant structures; EXPRESSED DURING: 6 growth stages; CONTAINS InterPro DOMAIN/s: Conserved hypothetical protein CHP00730 (Inter…
'13.2.3.5.1'	'mino acid metabolism.degradation.aspartate family.lysine.lysine decarboxylase'	HORVU3Hr1G050770,3	-4.45943	0.000141287	'(loc_os01g40630.1 : 286.0) no description available & (at2g37210 : 228.0) Encodes a protein of unknown function. It has been crystallized and shown to be structurally almost identical to the protein encoded by At5g11950.; lysine decarboxylase family protein; FUNCTIONS IN: molecular_function unknown; INVOLVED IN: biological_process unknown; LOCATED IN: cytosol, nucleus; EXPRESSED IN: 9 plant stru…
'13.2.4.1'	'amino acid metabolism.degradation.branched chain group.shared'	HORVU6Hr1G006560,5	-8.34873	8.6762e-28	'(loc_os07g07470.1 : 599.0) no description available & (at1g55510 : 560.0) branched-chain alpha-keto acid decarboxylase E1 beta; branched-chain alpha-keto acid decarboxylase E1 beta subunit (BCDH BETA1); FUNCTIONS IN: 3-methyl-2-oxobutanoate dehydrogenase (2-methylpropanoyl-transferring) activity, catalytic activity; INVOLVED IN: metabolic process; EXPRESSED IN: 24 plant structures; EXPRESSED DUR…
'16.1.4.1'	'secondary metabolism.isoprenoids.carotenoids.phytoene synthase'	HORVU7Hr1G120660,16	-10.1497	2.9057e-111	'(loc_os06g51290.3 : 382.0) no description available & (p49085|psy_maize : 372.0) Phytoene synthase, chloroplast precursor (EC 2.5.1.-) - Zea mays (Maize) & (at5g17230 : 340.0) Encodes phytoene synthase.; PHYTOENE SYNTHASE (PSY); CONTAINS InterPro DOMAIN/s: Squalene/phytoene synthase, conserved site (InterPro:IPR019845), Terpenoid synthase (InterPro:IPR008949), Squalene/phytoene synthase (InterPr…
'16.1.4.4'	'secondary metabolism.isoprenoids.carotenoids.lycopene epsilon cyclase'	HORVU3Hr1G050430,16	-8.62205	8.81494e-25	'(loc_os01g39960.1 : 520.0) no description available & (at5g57030 : 398.0) Lutein-deficient 2 (LUT2) required for lutein biosynthesis, member of the xanthophyll class of carotenoids. Encodes lycopene epsilon cyclase; LUTEIN DEFICIENT 2 (LUT2); CONTAINS InterPro DOMAIN/s: Lycopene beta/epsilon cyclase (InterPro:IPR008671), Lycopene cyclase, beta/epsilon (InterPro:IPR010108); BEST Arabidopsis thali…
'16.2.1.1'	'secondary metabolism.phenylpropanoids.lignin biosynthesis.PAL'	HORVU6Hr1G058820,7	-9.08215	2.2222e-111	'(p14717|pal1_orysa : 986.0) Phenylalanine ammonia-lyase (EC 4.3.1.5) - Oryza sativa (Rice) & (loc_os02g41630.3 : 986.0) no description available & (at3g53260 : 818.0) Encodes phenylalanine lyase. Arabidopsis has four PALs: AT2G37040 (PAL1), AT3G53260 (PAL2), AT5G04230 (PAL3) and AT3G10340 (PAL4).; phenylalanine ammonia-lyase 2 (PAL2); FUNCTIONS IN: phenylalanine ammonia-lyase activity; INVOLVED …
'16.7'	'secondary metabolism.wax'	HORVU1Hr1G089710,3	-8.83605	9.60754e-96	'(loc_os05g49290.3 : 888.0) no description available & (at1g19440 : 767.0) Encodes KCS4, a member of the 3-ketoacyl-CoA synthase family involved in the biosynthesis of VLCFA (very long chain fatty acids).; 3-ketoacyl-CoA synthase 4 (KCS4); FUNCTIONS IN: transferase activity, transferring acyl groups other than amino-acyl groups, catalytic activity; INVOLVED IN: very long-chain fatty acid metaboli…
'17.2.2'	'hormone metabolism.auxin.signal transduction'	HORVU5Hr1G081370,7	-8.21917	2.43586e-50	'(loc_os03g60550.2 : 541.0) no description available & (at1g05180 : 408.0) Encodes a subunit of the RUB1 activating enzyme that regulates the protein degradation activity of Skp1-Cullin-Fbox complexes, primarily, but not exclusively, affecting auxin responses. Acts alongside AS1 to exclude BP expression from leaves.; AUXIN RESISTANT 1 (AXR1); CONTAINS InterPro DOMAIN/s: Molybdenum cofactor biosyn…
'17.4.1'	'hormone metabolism.cytokinin.synthesis-degradation'	HORVU2Hr1G062320,13	-5.58496	1.97545e-08	'(loc_os01g73760.1 : 397.0) no description available & (at2g27760 : 265.0) Encodes tRNA isopentenyltransferase, similar to yeast MOD5.; tRNAisopentenyltransferase 2 (IPT2); CONTAINS InterPro DOMAIN/s: tRNA delta(2)-isopentenylpyrophosphate transferase (InterPro:IPR018022), tRNA isopentenyltransferase (InterPro:IPR002627); BEST Arabidopsis thaliana protein match is: isopentenyltransferase 5 (TAIR:…
'17.4.1'	'hormone metabolism.cytokinin.synthesis-degradation'	HORVU3Hr1G019850,4	-8.02791	9.4879e-25	'(q9t0n8|ckx1_maize : 216.0) Cytokinin dehydrogenase 1 precursor (EC 1.5.99.12) (Cytokinin oxidase 1) (CKO 1) (COX 1) (ZmCKX1) - Zea mays (Maize) & (loc_os01g09260.1 : 191.0) no description available & (at1g75450 : 111.0) This gene used to be called AtCKX6. It encodes a protein whose sequence is similar to cytokinin oxidase/dehydrogenase, which catalyzes the degradation of cytokinins.; cytokinin …
'17.4.1'	'hormone metabolism.cytokinin.synthesis-degradation'	HORVU3Hr1G027430,4	-5.2854	2.35034e-06	'(loc_os01g10110.1 : 300.0) no description available & (at5g56970 : 203.0) It encodes a protein whose sequence is similar to cytokinin oxidase/dehydrogenase, which catalyzes the degradation of cytokinins.; cytokinin oxidase 3 (CKX3); FUNCTIONS IN: primary amine oxidase activity, cytokinin dehydrogenase activity; INVOLVED IN: cytokinin catabolic process; LOCATED IN: vacuole; EXPRESSED IN: 14 plant…
'17.4.1'	'hormone metabolism.cytokinin.synthesis-degradation'	HORVU3Hr1G027430,2	-2.06045	2.19136e-70	'(loc_os01g10110.1 : 300.0) no description available & (at5g56970 : 203.0) It encodes a protein whose sequence is similar to cytokinin oxidase/dehydrogenase, which catalyzes the degradation of cytokinins.; cytokinin oxidase 3 (CKX3); FUNCTIONS IN: primary amine oxidase activity, cytokinin dehydrogenase activity; INVOLVED IN: cytokinin catabolic process; LOCATED IN: vacuole; EXPRESSED IN: 14 plant…
'17.4.1'	'hormone metabolism.cytokinin.synthesis-degradation'	HORVU3Hr1G027460,1	-2.83002	2.02084e-266	'(loc_os02g12780.1 : 444.0) no description available & (q9t0n8|ckx1_maize : 441.0) Cytokinin dehydrogenase 1 precursor (EC 1.5.99.12) (Cytokinin oxidase 1) (CKO 1) (COX 1) (ZmCKX1) - Zea mays (Maize) & (at5g56970 : 397.0) It encodes a protein whose sequence is similar to cytokinin oxidase/dehydrogenase, which catalyzes the degradation of cytokinins.; cytokinin oxidase 3 (CKX3); FUNCTIONS IN: prim…
'17.4.1'	'hormone metabolism.cytokinin.synthesis-degradation'	HORVU3Hr1G075920,4	-2.56884	1.45798e-05	'(loc_os01g56810.1 : 230.0) no description available & (at1g75450 : 162.0) This gene used to be called AtCKX6. It encodes a protein whose sequence is similar to cytokinin oxidase/dehydrogenase, which catalyzes the degradation of cytokinins.; cytokinin oxidase 5 (CKX5); CONTAINS InterPro DOMAIN/s: Cytokinin dehydrogenase 1, FAD/cytokinin binding domain (InterPro:IPR015345), FAD-binding, type 2 (In…
'17.4.1'	'hormone metabolism.cytokinin.synthesis-degradation'	HORVU3Hr1G075920,5	-5.45943	1.82987e-06	'(loc_os01g56810.1 : 230.0) no description available & (at1g75450 : 162.0) This gene used to be called AtCKX6. It encodes a protein whose sequence is similar to cytokinin oxidase/dehydrogenase, which catalyzes the degradation of cytokinins.; cytokinin oxidase 5 (CKX5); CONTAINS InterPro DOMAIN/s: Cytokinin dehydrogenase 1, FAD/cytokinin binding domain (InterPro:IPR015345), FAD-binding, type 2 (In…
'17.4.1'	'hormone metabolism.cytokinin.synthesis-degradation'	HORVU3Hr1G105360,7	-5.80735	7.77276e-09	'(loc_os01g71310.1 : 169.0) no description available & (at2g41510 : 135.0) It encodes a protein whose sequence is similar to cytokinin oxidase/dehydrogenase, which catalyzes the degradation of cytokinins.; cytokinin oxidase/dehydrogenase 1 (CKX1); FUNCTIONS IN: cytokinin dehydrogenase activity; INVOLVED IN: N-terminal protein myristoylation, cytokinin catabolic process, meristem development; LOCA…
'17.4.1'	'hormone metabolism.cytokinin.synthesis-degradation'	HORVU3Hr1G019850,5	-8.42626	2.92118e-31	'(loc_os01g09260.1 : 169.0) no description available & (q9t0n8|ckx1_maize : 166.0) Cytokinin dehydrogenase 1 precursor (EC 1.5.99.12) (Cytokinin oxidase 1) (CKO 1) (COX 1) (ZmCKX1) - Zea mays (Maize) & (at4g29740 : 133.0) It encodes a protein whose sequence is similar to cytokinin oxidase/dehydrogenase, which catalyzes the degradation of cytokinins.; cytokinin oxidase 4 (CKX4); FUNCTIONS IN: prim…
'17.4.1'	'hormone metabolism.cytokinin.synthesis-degradation'	HORVU5Hr1G043780,3	-8.81378	2.32264e-59	'(loc_os03g60960.1 : 211.0) no description available & (at5g05900 : 114.0) UDP-Glycosyltransferase superfamily protein; FUNCTIONS IN: UDP-glycosyltransferase activity, transferase activity, transferring glycosyl groups; INVOLVED IN: metabolic process; LOCATED IN: cellular_component unknown; EXPRESSED IN: root; CONTAINS InterPro DOMAIN/s: UDP-glucuronosyl/UDP-glucosyltransferase (InterPro:IPR00221…
'17.5.1'	'hormone metabolism.ethylene.synthesis-degradation'	HORVU5Hr1G050570,5	-8.41363	3.63394e-18	'(loc_os09g02710.1 : 155.0) no description available & (at4g34120 : 141.0) LOSS OF THE TIMING OF ET AND JA BIOSYNTHESIS 1 (LEJ1); FUNCTIONS IN: molecular_function unknown; INVOLVED IN: biological_process unknown; LOCATED IN: chloroplast stroma, chloroplast; EXPRESSED IN: 23 plant structures; EXPRESSED DURING: 13 growth stages; CONTAINS InterPro DOMAIN/s: Cystathionine beta-synthase, core (InterPr…
'17.5.1'	'hormone metabolism.ethylene.synthesis-degradation'	HORVU6Hr1G079140,11	-11.8754	0	'(loc_os02g53330.2 : 614.0) no description available & (at1g48420 : 516.0) Encodes an enzyme that decomposes D-cysteine into pyruvate, H2S, and NH3. Only D-cysteine but not L-cysteine was converted by D-CDes to pyruvate, H2S, and NH3. There is conflicting evidence on its 1-aminocyclopropane-1-carboxylate deaminase activity. Involved in regulating ethylene levels.; D-cysteine desulfhydrase (D-CDES…
'17.7.1.2'	'hormone metabolism.jasmonate.synthesis-degradation.lipoxygenase'	HORVU4Hr1G005920,57	-8.73809	2.91174e-85	'(p29114|lox1_horvu : 906.0) Lipoxygenase 1 (EC 1.13.11.12) - Hordeum vulgare (Barley) & (loc_os03g49350.1 : 763.0) no description available & (at1g55020 : 532.0) lipoxygenase, a defense gene conferring resistance Xanthomonas campestris; lipoxygenase 1 (LOX1); CONTAINS InterPro DOMAIN/s: Lipoxygenase, iron binding site (InterPro:IPR020833), Lipoxygenase, C-terminal (InterPro:IPR013819), Lipoxygen…
'18'	'Co-factor and vitamine metabolism'	HORVU4Hr1G052000,2	-8.47168	4.0801e-73	'(loc_os03g20560.1 : 414.0) no description available & (at1g04640 : 325.0) Lipoyltransferase, located in mitochondria but not found in chloroplasts; lipoyltransferase 2 (LIP2); CONTAINS InterPro DOMAIN/s: Octanoyltransferase (InterPro:IPR000544), Octanoyltransferase, conserved site (InterPro:IPR020605), Biotin/lipoate A/B protein ligase (InterPro:IPR004143); BEST Arabidopsis thaliana protein matc…
'18.1'	'Co-factor and vitamine metabolism.molybdenum cofactor'	HORVU2Hr1G080450,5	-8.20945	3.52044e-24	'(loc_os04g38700.1 : 319.0) no description available & (at1g01290 : 222.0) COFACTOR OF NITRATE REDUCTASE AND XANTHINE DEHYDROGENASE 3. Encodes a protein involved in molybdenum cofactor biosynthesis. Homologous to E.coli MoaC. Expression is low in all tissues examined, except in roots. Appears to have targeting signals for chloroplast or mitochondria; cofactor of nitrate reductase and xanthine deh…
'18.1'	'Co-factor and vitamine metabolism.molybdenum cofactor'	HORVU5Hr1G089780,6	-8.78136	1.73388e-27	'(loc_os09g38772.1 : 308.0) no description available & (at5g44720 : 195.0) Molybdenum cofactor sulfurase family protein; FUNCTIONS IN: molybdenum ion binding, Mo-molybdopterin cofactor sulfurase activity, pyridoxal phosphate binding, catalytic activity; INVOLVED IN: biological_process unknown; LOCATED IN: cellular_component unknown; EXPRESSED IN: 22 plant structures; EXPRESSED DURING: 13 growth s…
'19.2'	'tetrapyrrole synthesis.glu-tRNA reductase'	HORVU1Hr1G011520,3	-10.7125	2.28852e-280	'(q96563|hem12_horvu : 805.0) Glutamyl-tRNA reductase 2 (EC 1.2.1.70) (GluTR) (Fragment) - Hordeum vulgare (Barley) & (loc_os10g35840.1 : 761.0) no description available & (at1g58290 : 586.0) Encodes a protein with glutamyl-tRNA reductase (GluTR) activity, catalyzing the NADPH-dependent reduction of Glu-tRNA(Glu) to glutamate 1-semialdehyde (GSA) with the release of free tRNA(Glu). It is involved…
'19.2'	'tetrapyrrole synthesis.glu-tRNA reductase'	HORVU1Hr1G011520,2	-8.3837	2.35978e-56	'(q96563|hem12_horvu : 805.0) Glutamyl-tRNA reductase 2 (EC 1.2.1.70) (GluTR) (Fragment) - Hordeum vulgare (Barley) & (loc_os10g35840.1 : 761.0) no description available & (at1g58290 : 586.0) Encodes a protein with glutamyl-tRNA reductase (GluTR) activity, catalyzing the NADPH-dependent reduction of Glu-tRNA(Glu) to glutamate 1-semialdehyde (GSA) with the release of free tRNA(Glu). It is involved…
'19.40'	'tetrapyrrole synthesis.regulation'	HORVU6Hr1G018610,3	-8.38802	2.07148e-37	'(loc_os02g37470.1 : 315.0) no description available & (at3g14110 : 233.0) Encodes a novel coiled-coil, TPR domain containing protein that is localized to the chloroplast membrane and is involved in chlorophyll biosynthesis. Mutants accumulate protochlorophyllide, an intermediate in the chlorophyll biosynthesis pathway, in dark and release singlet oxygen in plastids in a controlled and non-invasi…
'19.8'	'tetrapyrrole synthesis.coproporphyrinogen III oxidase'	HORVU2Hr1G099770,8	-8.30834	2.17246e-28	'(q42840|hem6_horvu : 689.0) Coproporphyrinogen III oxidase, chloroplast precursor (EC 1.3.3.3) (Coproporphyrinogenase) (Coprogen oxidase) - Hordeum vulgare (Barley) & (loc_os04g52130.1 : 645.0) no description available & (at1g03475 : 572.0) Encodes coproporphyrinogen III oxidase, a key enzyme in the biosynthetic pathway of chlorophyll and heme, a tetrapyrrole pathway. Mutants express cytological…
'19.9'	'tetrapyrrole synthesis.protoporphyrin IX oxidase'	HORVU5Hr1G011100,5	-9.42836	5.37222e-75	'(loc_os01g18320.1 : 556.0) no description available & (at4g01690 : 492.0) Encodes protoporphyrinogen oxidase (PPOX).; PPOX; FUNCTIONS IN: oxygen-dependent protoporphyrinogen oxidase activity; INVOLVED IN: porphyrin biosynthetic process; LOCATED IN: chloroplast, chloroplast envelope; EXPRESSED IN: 25 plant structures; EXPRESSED DURING: 16 growth stages; CONTAINS InterPro DOMAIN/s: Amine oxidase (…
'20.1'	'stress.biotic'	HORVU1Hr1G018260,15	-8.41363	4.69992e-13	'(loc_os05g04930.1 : 422.0) no description available & (at5g17540 : 283.0) HXXXD-type acyl-transferase family protein; FUNCTIONS IN: transferase activity, transferring acyl groups other than amino-acyl groups; INVOLVED IN: biological_process unknown; LOCATED IN: cellular_component unknown; EXPRESSED IN: 9 plant structures; EXPRESSED DURING: 4 anthesis, C globular stage, F mature embryo stage, pet…
'20.1'	'stress.biotic'	HORVU4Hr1G088650,12	-7.25739	4.43468e-22	'(loc_os03g01160.1 : 746.0) no description available & (at5g61550 : 456.0) U-box domain-containing protein kinase family protein; FUNCTIONS IN: ubiquitin-protein ligase activity, protein serine/threonine kinase activity, protein kinase activity, kinase activity, ATP binding; INVOLVED IN: protein amino acid phosphorylation, protein ubiquitination; LOCATED IN: ubiquitin ligase complex; CONTAINS Int…
'20.1'	'stress.biotic'	HORVU6Hr1G021340,9	-8.50779	1.24258e-90	'(loc_os02g05450.1 : 461.0) no description available & (at4g29940 : 196.0) Homeodomain protein (PRHA). Expression of the gene differs in various vegetative and floral plant tissues and is positively influenced by the phytohormone auxin. It is often associated with regions of developing vascular tissue. The prha promoter is highly responsive to the synthetic auxin, naphthalene acetic acid, in tran…
'20.1.1'	'stress.biotic.respiratory burst'	HORVU4Hr1G086500,18	-8.31288	4.15376e-80	'(loc_os01g25820.1 : 1135.0) no description available & (at1g09090 : 862.0) NADPH-oxidase AtrbohB plays a role in seed after-ripening. Major producer of superoxide in germinating seeds. AtrbohB pre-mRNA is alternatively spliced in seeds in a hormonally and developmentally regulated manner. ABA caused accumulation of AtrbohB-ď¬‚ mRNA and prevented prevented AtrbohB-a mRNA expression in fresh seeds…
'20.2.1'	'stress.abiotic.heat'	HORVU1Hr1G027420,5	-9.3015	1.04518e-146	'(loc_os01g08560.2 : 1243.0) no description available & (at1g79920 : 1082.0) Heat shock protein 70 (Hsp 70) family protein; FUNCTIONS IN: ATP binding; LOCATED IN: cell wall, plasma membrane; EXPRESSED IN: male gametophyte, guard cell, cultured cell, pollen tube; EXPRESSED DURING: L mature pollen stage, M germinated pollen stage; CONTAINS InterPro DOMAIN/s: Heat shock protein Hsp70 (InterPro:IPR00…
'20.2.1'	'stress.abiotic.heat'	HORVU3Hr1G000130,7	-9.2384	7.52174e-55	'(loc_os12g15590.2 : 409.0) no description available & (at1g61770 : 352.0) J domain protein.; Chaperone DnaJ-domain superfamily protein; FUNCTIONS IN: unfolded protein binding, heat shock protein binding; INVOLVED IN: protein folding; LOCATED IN: endoplasmic reticulum; EXPRESSED IN: 26 plant structures; EXPRESSED DURING: 15 growth stages; CONTAINS InterPro DOMAIN/s: Molecular chaperone, heat shoc…
'20.2.1'	'stress.abiotic.heat'	HORVU3Hr1G051850,5	-8.61471	2.0597e-169	'(loc_os01g27740.3 : 840.0) no description available & (at5g18750 : 285.0) DNAJ heat shock N-terminal domain-containing protein; FUNCTIONS IN: unfolded protein binding, heat shock protein binding; INVOLVED IN: protein folding; LOCATED IN: cellular_component unknown; EXPRESSED IN: 19 plant structures; EXPRESSED DURING: 8 growth stages; CONTAINS InterPro DOMAIN/s: Molecular chaperone, heat shock pr…
'20.2.1'	'stress.abiotic.heat'	HORVU4Hr1G061700,3	-8.61839	2.94388e-26	'(loc_os03g15480.1 : 161.0) no description available & (at5g22080 : 133.0) Chaperone DnaJ-domain superfamily protein; FUNCTIONS IN: heat shock protein binding; INVOLVED IN: protein folding; LOCATED IN: cellular_component unknown; CONTAINS InterPro DOMAIN/s: Heat shock protein DnaJ, N-terminal (InterPro:IPR001623); BEST Arabidopsis thaliana protein match is: DNAJ heat shock N-terminal domain-conta…
'20.2.1'	'stress.abiotic.heat'	HORVU5Hr1G068750,5	-8.35315	6.81384e-21	'(loc_os09g28590.2 : 251.0) no description available & (at4g10130 : 140.0) DNAJ heat shock N-terminal domain-containing protein; FUNCTIONS IN: heat shock protein binding; INVOLVED IN: protein folding; LOCATED IN: cellular_component unknown; EXPRESSED IN: 22 plant structures; EXPRESSED DURING: 13 growth stages; CONTAINS InterPro DOMAIN/s: Molecular chaperone, heat shock protein, Hsp40, DnaJ (Inter…
'20.2.1'	'stress.abiotic.heat'	HORVU0Hr1G017450,2	-8.88264	1.30315e-81	'(loc_os02g56040.1 : 615.0) no description available & (at1g80030 : 473.0) Molecular chaperone Hsp40/DnaJ family protein; FUNCTIONS IN: unfolded protein binding, heat shock protein binding, ATP binding; INVOLVED IN: protein folding, response to heat; LOCATED IN: chloroplast thylakoid membrane, chloroplast; EXPRESSED IN: 23 plant structures; EXPRESSED DURING: 14 growth stages; CONTAINS InterPro DO…
'21.1'	'redox.thioredoxin'	HORVU3Hr1G054240,6	-8.40939	3.3342e-63	'(loc_os01g42960.1 : 526.0) no description available & (at1g53300 : 322.0) tetratricopetide-repeat thioredoxin-like 1 (TTL1); FUNCTIONS IN: binding; INVOLVED IN: cell redox homeostasis; EXPRESSED IN: 22 plant structures; EXPRESSED DURING: 13 growth stages; CONTAINS InterPro DOMAIN/s: Molecular chaperone, heat shock protein, Hsp40, DnaJ (InterPro:IPR015609), Tetratricopeptide TPR-1 (InterPro:IPR00…
'21.1'	'redox.thioredoxin'	HORVU4Hr1G037290,1	-8.45121	9.57506e-53	'(loc_os09g07570.1 : 89.7) no description available & (o49856|ftrc_soybn : 87.4) Ferredoxin-thioredoxin reductase catalytic chain, chloroplast precursor (EC 1.18.-.-) (FTR-C) - Glycine max (Soybean) & (at2g04700 : 82.8) ferredoxin thioredoxin reductase catalytic beta chain family protein; FUNCTIONS IN: ferredoxin:thioredoxin reductase activity, ferredoxin reductase activity; INVOLVED IN: oxidatio…
'21.1'	'redox.thioredoxin'	HORVU6Hr1G001690,4	-9.26209	4.02402e-86	'(loc_os09g07570.1 : 161.0) no description available & (p41347|ftrc_maize : 157.0) Ferredoxin-thioredoxin reductase catalytic chain, chloroplast precursor (EC 1.18.-.-) (FTR-C) (Ferredoxin-thioredoxin reductase subunit B) (FTR-B) - Zea mays (Maize) & (at2g04700 : 145.0) ferredoxin thioredoxin reductase catalytic beta chain family protein; FUNCTIONS IN: ferredoxin:thioredoxin reductase activity, f…
'21.1'	'redox.thioredoxin'	HORVU7Hr1G119720,3	-9.43879	1.43663e-35	'(q9zp20|trxm_orysa : 142.0) Thioredoxin M-type, chloroplast precursor (TRX-M) - Oryza sativa (Rice) & (loc_os12g08730.1 : 142.0) no description available & (at3g15360 : 127.0) encodes a prokaryotic thioredoxin; thioredoxin M-type 4 (TRX-M4); FUNCTIONS IN: enzyme activator activity; INVOLVED IN: response to oxidative stress, positive regulation of catalytic activity; LOCATED IN: thylakoid, chloro…
'21.2'	'redox.ascorbate and glutathione'	HORVU7Hr1G030810,6	-9.50383	6.92464e-27	'(loc_os06g08670.1 : 249.0) no description available & (at2g25080 : 241.0) Encodes glutathione peroxidase.; glutathione peroxidase 1 (GPX1); FUNCTIONS IN: glutathione peroxidase activity; INVOLVED IN: oxidation reduction, response to oxidative stress; LOCATED IN: chloroplast thylakoid membrane, chloroplast stroma, chloroplast, chloroplast envelope; EXPRESSED IN: 23 plant structures; EXPRESSED DUR…
'21.2'	'redox.ascorbate and glutathione'	HORVU7Hr1G058730,5	-8.24793	8.46234e-120	'(loc_os08g44340.1 : 739.0) no description available & (q40977|mdar_pea : 646.0) Monodehydroascorbate reductase (EC 1.6.5.4) (MDAR) (Ascorbate free radical reductase) (AFR reductase) - Pisum sativum (Garden pea) & (at3g52880 : 638.0) Encodes a peroxisomal monodehydroascorbate reductase, involved in the ascorbate-glutathione cycle which removes toxic H2O2; monodehydroascorbate reductase 1 (MDAR1);…
'21.2.1'	'redox.ascorbate and glutathione.ascorbate'	HORVU5Hr1G037160,4	-8.90989	2.49346e-79	'(p0c0l1|apx6_orysa : 324.0) Probable L-ascorbate peroxidase 6, chloroplast precursor (EC 1.11.1.11) (OsAPx06) - Oryza sativa (Rice) & (loc_os12g07820.1 : 324.0) no description available & (at4g08390 : 289.0) Encodes a chloroplastic stromal ascorbate peroxidase sAPX. Ascorbate peroxidases are enzymes that scavenge hydrogen peroxide in plant cells. Eight types of APX have been described for Arabid…
'22.1.5'	'polyamine metabolism.synthesis.N-carbamoylputrescine amidohydrolase'	HORVU5Hr1G006730,5	-10.8564	2.2808e-237	'(q93xi4|agub_orysa : 540.0) N-carbamoylputrescine amidase (EC 3.5.1.53) - Oryza sativa (Rice) & (loc_os02g33080.1 : 540.0) no description available & (at2g27450 : 491.0) Encodes N-carbamoylputrescine amidohydrolase that is involved in putrescine and polyamine biosynthesis.; nitrilase-like protein 1 (NLP1); CONTAINS InterPro DOMAIN/s: Nitrilase/cyanide hydratase and apolipoprotein N-acyltransfera…
'23.1.2.9'	'nucleotide metabolism.synthesis.purine.AICAR transformylase'	HORVU3Hr1G098870,8	-8.51964	3.76382e-55	'(loc_os08g10570.1 : 943.0) no description available & (at2g35040 : 852.0) AICARFT/IMPCHase bienzyme family protein; FUNCTIONS IN: phosphoribosylaminoimidazolecarboxamide formyltransferase activity, IMP cyclohydrolase activity, catalytic activity; INVOLVED IN: response to cold, purine nucleotide biosynthetic process; LOCATED IN: stromule; EXPRESSED IN: 23 plant structures; EXPRESSED DURING: 13 gr…
'23.4.3'	'nucleotide metabolism.phosphotransfer and pyrophosphatases.uridylate kinase'	HORVU7Hr1G034340,9	-8.27146	4.3415e-28	'(loc_os02g53790.2 : 342.0) no description available & (at5g26667 : 293.0) encodes a uridine 5'-monophosphate (UMP)/cytidine 5'-monophosphate (CMP) kinase.; PYR6; FUNCTIONS IN: uridylate kinase activity, cytidylate kinase activity; INVOLVED IN: pyrimidine ribonucleoside monophosphate metabolic process; LOCATED IN: cellular_component unknown; EXPRESSED IN: male gametophyte, cultured cell; EXPRESSE…
'24.2'	'Biodegradation of Xenobiotics.lactoylglutathione lyase'	HORVU7Hr1G085150,8	-8.75489	3.35682e-33	'(q948t6|lgul_orysa : 171.0) Lactoylglutathione lyase (EC 4.4.1.5) (Methylglyoxalase) (Aldoketomutase) (Glyoxalase I) (Glx I) (Ketone-aldehyde mutase) (S-D-lactoylglutathione methylglyoxal lyase) (Allergen Ory s ?) (Allergen Glb33) (PP33) - Oryza sativa (Rice) & (loc_os08g09250.3 : 171.0) no description available & (at1g67280 : 139.0) Glyoxalase/Bleomycin resistance protein/Dioxygenase superfamil…
'25'	'C1-metabolism'	HORVU7Hr1G120490,16	-8.77808	1.34904e-20	'(loc_os02g52430.2 : 261.0) no description available & (at5g16450 : 235.0) Ribonuclease E inhibitor RraA/Dimethylmenaquinone methyltransferase; FUNCTIONS IN: ribonuclease inhibitor activity; INVOLVED IN: regulation of RNA metabolic process; LOCATED IN: cellular_component unknown; EXPRESSED IN: 24 plant structures; EXPRESSED DURING: 13 growth stages; CONTAINS InterPro DOMAIN/s: Ribonuclease E inhi…
'26.1'	'misc.misc2'	HORVU3Hr1G017700,4	-9.27845	3.23244e-45	'(loc_os01g34700.1 : 434.0) no description available & (at2g32520 : 370.0) alpha/beta-Hydrolases superfamily protein; FUNCTIONS IN: hydrolase activity, transferase activity, transferring acyl groups other than amino-acyl groups; INVOLVED IN: response to zinc ion; LOCATED IN: chloroplast; EXPRESSED IN: 24 plant structures; EXPRESSED DURING: 13 growth stages; CONTAINS InterPro DOMAIN/s: Thiolase, a…
'26.10'	'misc.cytochrome P450'	HORVU2Hr1G112070,3	-8.27612	7.47334e-51	'(loc_os01g43700.2 : 627.0) no description available & (at3g14690 : 431.0) putative cytochrome P450; "cytochrome P450, family 72, subfamily A, polypeptide 15" (CYP72A15); FUNCTIONS IN: electron carrier activity, monooxygenase activity, iron ion binding, oxygen binding, heme binding; INVOLVED IN: response to cyclopentenone; LOCATED IN: endomembrane system; EXPRESSED IN: 22 plant structures; EXPRES…
'26.10'	'misc.cytochrome P450'	HORVU2Hr1G022080,18	-8.93958	1.45622e-60	'(loc_os03g25480.1 : 643.0) no description available & (at2g46950 : 479.0) member of CYP709B; "cytochrome P450, family 709, subfamily B, polypeptide 2" (CYP709B2); FUNCTIONS IN: electron carrier activity, monooxygenase activity, iron ion binding, oxygen binding, heme binding; INVOLVED IN: oxidation reduction; LOCATED IN: endomembrane system; EXPRESSED IN: 14 plant structures; EXPRESSED DURING: 4 …
'26.11'	'misc.alcohol dehydrogenases'	HORVU6Hr1G090260,2	-8.2384	1.00418e-43	'(p93436|adhx_orysa : 414.0) Alcohol dehydrogenase class 3 (EC 1.1.1.1) (Alcohol dehydrogenase class III) (S-(hydroxymethyl)glutathione dehydrogenase) (EC 1.1.1.284) (Glutathione-dependent formaldehyde dehydrogenase) (FDH) (FALDH) (GSH-FDH) - Oryza sativa (Rice) & (loc_os02g57040.1 : 414.0) no description available & (at5g43940 : 397.0) Encodes a glutathione-dependent formaldehyde dehydrogenase (…
'26.16'	'misc.myrosinases-lectin-jacalin'	HORVU7Hr1G026540,3	-9.05257	1.69114e-119	'(loc_os06g06940.1 : 912.0) no description available & (p17801|kpro_maize : 381.0) Putative receptor protein kinase ZmPK1 precursor (EC 2.7.11.1) - Zea mays (Maize) & (at4g32300 : 256.0) S-domain-2 5 (SD2-5); FUNCTIONS IN: carbohydrate binding, protein kinase activity, kinase activity; INVOLVED IN: protein amino acid autophosphorylation; LOCATED IN: plasma membrane; EXPRESSED IN: 25 plant structu…
'26.17'	'misc.dynamin'	HORVU1Hr1G084970,1	-8.93664	5.65322e-109	'(loc_os05g48240.3 : 733.0) no description available & (at5g42080 : 639.0) Encodes a dynamin-like protein related to phragmoplastin. Mutations in this gene, in combination with mutation in ADL1E, result in defects in embryogenesis, cell plate formation and trichome branching. Also controls vascular patterning in combination with VAN3 and GNOM. DRP2B and DRP1A participate together in clathrin-coat…
'26.2'	'misc.UDP glucosyl and glucoronyl transferases'	HORVU3Hr1G036630,1	-9.34207	4.76332e-60	'(loc_os01g15780.1 : 591.0) no description available & (at1g75420 : 512.0) UDP-Glycosyltransferase superfamily protein; FUNCTIONS IN: transferase activity, transferring glycosyl groups; INVOLVED IN: biosynthetic process; LOCATED IN: cellular_component unknown; EXPRESSED IN: 22 plant structures; EXPRESSED DURING: 13 growth stages; CONTAINS InterPro DOMAIN/s: Glycosyl transferase, group 1 (InterPro…
'26.22'	'misc.short chain dehydrogenase/reductase (SDR)'	HORVU3Hr1G013970,9	-9.66356	1.91351e-52	'(loc_os01g05840.3 : 306.0) no description available & (at2g37540 : 236.0) NAD(P)-binding Rossmann-fold superfamily protein; FUNCTIONS IN: oxidoreductase activity, binding, catalytic activity; INVOLVED IN: pollen tube growth; EXPRESSED IN: 23 plant structures; EXPRESSED DURING: 13 growth stages; CONTAINS InterPro DOMAIN/s: NAD(P)-binding domain (InterPro:IPR016040), Glucose/ribitol dehydrogenase …
'26.23'	'misc.rhodanese'	HORVU5Hr1G080980,10	-9.45943	4.38584e-157	'(loc_os09g36040.1 : 305.0) no description available & (at4g27700 : 228.0) Rhodanese/Cell cycle control phosphatase superfamily protein; FUNCTIONS IN: molecular_function unknown; INVOLVED IN: aging; LOCATED IN: chloroplast thylakoid membrane, chloroplast; EXPRESSED IN: 21 plant structures; EXPRESSED DURING: 13 growth stages; CONTAINS InterPro DOMAIN/s: Rhodanese-like (InterPro:IPR001763); BEST Ar…
'26.23'	'misc.rhodanese'	HORVU5Hr1G080980,7	-9.21917	1.55163e-48	'(loc_os09g36040.1 : 305.0) no description available & (at4g27700 : 228.0) Rhodanese/Cell cycle control phosphatase superfamily protein; FUNCTIONS IN: molecular_function unknown; INVOLVED IN: aging; LOCATED IN: chloroplast thylakoid membrane, chloroplast; EXPRESSED IN: 21 plant structures; EXPRESSED DURING: 13 growth stages; CONTAINS InterPro DOMAIN/s: Rhodanese-like (InterPro:IPR001763); BEST Ar…
'26.26.1'	'misc.aminotransferases.aminotransferase class IV family protein'	HORVU6Hr1G035190,2	-9.30834	4.31676e-65	'(loc_os03g24460.2 : 148.0) no description available & (at5g27410 : 123.0) D-aminoacid aminotransferase-like PLP-dependent enzymes superfamily protein; FUNCTIONS IN: catalytic activity; INVOLVED IN: metabolic process; LOCATED IN: cellular_component unknown; EXPRESSED IN: 20 plant structures; EXPRESSED DURING: 10 growth stages; CONTAINS InterPro DOMAIN/s: Aminotransferase, class IV (InterPro:IPR00…
'26.28'	'misc.GDSL-motif lipase'	HORVU3Hr1G071400,2	-9.02237	4.69992e-13	'(loc_os05g44200.1 : 293.0) no description available & (at4g18970 : 240.0) GDSL-like Lipase/Acylhydrolase superfamily protein; FUNCTIONS IN: hydrolase activity, acting on ester bonds, carboxylesterase activity; INVOLVED IN: lipid metabolic process; LOCATED IN: endomembrane system; EXPRESSED IN: 19 plant structures; EXPRESSED DURING: 13 growth stages; CONTAINS InterPro DOMAIN/s: Lipase, GDSL (Inte…
'26.3'	'misc.gluco-, galacto- and mannosidases'	HORVU2Hr1G023590,7	-7.67243	3.30072e-37	'(loc_os07g46280.2 : 176.0) no description available & (at3g18080 : 145.0) B-S glucosidase 44 (BGLU44); FUNCTIONS IN: in 6 functions; INVOLVED IN: carbohydrate metabolic process; LOCATED IN: cytosolic ribosome, cell wall, plant-type cell wall; EXPRESSED IN: 22 plant structures; EXPRESSED DURING: 13 growth stages; CONTAINS InterPro DOMAIN/s: Glycoside hydrolase, family 1 (InterPro:IPR001360), Glyc…
'26.5'	'misc.acyl transferases'	HORVU7Hr1G046970,13	-8.3837	3.57674e-21	'(loc_os06g22080.1 : 327.0) no description available & (at3g51520 : 256.0) diacylglycerol acyltransferase family; FUNCTIONS IN: diacylglycerol O-acyltransferase activity, transferase activity, transferring acyl groups other than amino-acyl groups; INVOLVED IN: biological_process unknown; LOCATED IN: cellular_component unknown; EXPRESSED IN: 22 plant structures; EXPRESSED DURING: 13 growth stages;…
'26.6'	'misc.O-methyl transferases'	HORVU5Hr1G050850,5	-9.02237	1.04062e-54	'(loc_os03g23970.2 : 427.0) no description available & (at4g31790 : 352.0) Tetrapyrrole (Corrin/Porphyrin) Methylases; FUNCTIONS IN: methyltransferase activity, diphthine synthase activity; INVOLVED IN: peptidyl-diphthamide biosynthetic process from peptidyl-histidine, metabolic process; LOCATED IN: cellular_component unknown; EXPRESSED IN: 22 plant structures; EXPRESSED DURING: 13 growth stages;…
'26.7'	'misc.oxidases - copper, flavone etc'	HORVU2Hr1G042270,4	-8.49185	1.81952e-33	'(loc_os04g30420.1 : 227.0) no description available & (at4g13010 : 178.0) Oxidoreductase, zinc-binding dehydrogenase family protein; FUNCTIONS IN: oxidoreductase activity, zinc ion binding; INVOLVED IN: oxidation reduction; LOCATED IN: chloroplast thylakoid membrane, chloroplast, plasma membrane, vacuole; EXPRESSED IN: 25 plant structures; EXPRESSED DURING: 15 growth stages; CONTAINS InterPro DO…
'26.9'	'misc.glutathione S transferases'	HORVU7Hr1G098110,6	-8.54303	4.25314e-38	'(loc_os10g02040.1 : 172.0) no description available & (at5g06720 : 131.0) peroxidase 2 (PA2); FUNCTIONS IN: peroxidase activity, heme binding; INVOLVED IN: oxidation reduction, response to oxidative stress; LOCATED IN: endomembrane system; EXPRESSED IN: 21 plant structures; EXPRESSED DURING: 11 growth stages; CONTAINS InterPro DOMAIN/s: Haem peroxidase (InterPro:IPR010255), Plant peroxidase (Int…
'26.9'	'misc.glutathione S transferases'	HORVU3Hr1G074020,2	-8.90689	7.8884e-46	'(p12653|gstf1_maize : 239.0) Glutathione S-transferase I (EC 2.5.1.18) (GST-I) (GST-29) (GST class-phi) - Zea mays (Maize) & (loc_os01g55830.1 : 233.0) no description available & (at3g62760 : 114.0) Encodes glutathione transferase belonging to the phi class of GSTs. Naming convention according to Wagner et al. (2002).; ATGSTF13; CONTAINS InterPro DOMAIN/s: Thioredoxin fold (InterPro:IPR012335), …
'27.1'	'RNA.processing'	HORVU2Hr1G106810,4	-9.38802	5.20444e-81	'(loc_os04g53440.1 : 454.0) no description available & (at1g11650 : 354.0) RBP45B; FUNCTIONS IN: RNA binding; EXPRESSED IN: 26 plant structures; EXPRESSED DURING: 16 growth stages; CONTAINS InterPro DOMAIN/s: RNA recognition motif, RNP-1 (InterPro:IPR000504), Nucleotide-binding, alpha-beta plait (InterPro:IPR012677); BEST Arabidopsis thaliana protein match is: RNA-binding protein 45A (TAIR:AT5G54…
'27.1'	'RNA.processing'	HORVU7Hr1G120070,5	-4.80735	3.6067e-05	'(loc_os06g51350.1 : 555.0) no description available & (at5g20040 : 435.0) Encodes tRNA isopentenyltransferase AtIPT9.; isopentenyltransferase 9 (IPT9); FUNCTIONS IN: tRNA dimethylallyltransferase activity, ATP binding; INVOLVED IN: tRNA processing, cytokinin biosynthetic process; EXPRESSED IN: 19 plant structures; EXPRESSED DURING: 13 growth stages; CONTAINS InterPro DOMAIN/s: tRNA delta(2)-isop…
'27.1'	'RNA.processing'	HORVU7Hr1G120070,13	-2.25481	3.57228e-07	'(loc_os06g51350.1 : 555.0) no description available & (at5g20040 : 435.0) Encodes tRNA isopentenyltransferase AtIPT9.; isopentenyltransferase 9 (IPT9); FUNCTIONS IN: tRNA dimethylallyltransferase activity, ATP binding; INVOLVED IN: tRNA processing, cytokinin biosynthetic process; EXPRESSED IN: 19 plant structures; EXPRESSED DURING: 13 growth stages; CONTAINS InterPro DOMAIN/s: tRNA delta(2)-isop…
'27.1'	'RNA.processing'	HORVU7Hr1G120070,7	-5.16993	2.46856e-07	'(loc_os06g51350.1 : 555.0) no description available & (at5g20040 : 435.0) Encodes tRNA isopentenyltransferase AtIPT9.; isopentenyltransferase 9 (IPT9); FUNCTIONS IN: tRNA dimethylallyltransferase activity, ATP binding; INVOLVED IN: tRNA processing, cytokinin biosynthetic process; EXPRESSED IN: 19 plant structures; EXPRESSED DURING: 13 growth stages; CONTAINS InterPro DOMAIN/s: tRNA delta(2)-isop…
'27.1.1'	'RNA.processing.splicing'	HORVU1Hr1G046870,4	-8.29002	1.98793e-35	'(loc_os10g02630.1 : 125.0) no description available & (at3g50670 : 110.0) Encodes U1 snRNP 70K; U1 small nuclear ribonucleoprotein-70K (U1-70K); FUNCTIONS IN: RNA binding, nucleotide binding; INVOLVED IN: nuclear mRNA splicing, via spliceosome; LOCATED IN: nucleus; EXPRESSED IN: 23 plant structures; EXPRESSED DURING: 13 growth stages; CONTAINS InterPro DOMAIN/s: U1 small nuclear ribonucleoprotei…
'27.1.1'	'RNA.processing.splicing'	HORVU4Hr1G083960,9	-9.88722	1.53758e-137	'(loc_os10g32880.2 : 225.0) no description available & (at2g33340 : 186.0) Encodes MAC3B, a U-box proteins with homology to the yeast and human E3 ubiquitin ligase Prp19. Associated with the MOS4-Associated Complex (MAC). Involved in plant innate immunity.; MOS4-associated complex 3B (MAC3B); FUNCTIONS IN: ubiquitin-protein ligase activity, nucleotide binding; INVOLVED IN: defense response to bac…
'27.1.1'	'RNA.processing.splicing'	HORVU6Hr1G083840,6	-9.45533	7.17212e-64	'(loc_os02g54770.2 : 185.0) no description available & (at2g24590 : 155.0) RNA recognition motif and CCHC-type zinc finger domains containing protein; FUNCTIONS IN: zinc ion binding, nucleotide binding, nucleic acid binding; INVOLVED IN: RNA splicing; LOCATED IN: nucleolus; EXPRESSED IN: 25 plant structures; EXPRESSED DURING: 13 growth stages; CONTAINS InterPro DOMAIN/s: RNA recognition motif, RN…
'27.1.19'	'RNA.processing.ribonucleases'	HORVU4Hr1G012650,3	-8.54689	6.70836e-33	'(loc_os11g20689.1 : 290.0) no description available & (at1g60080 : 192.0) 3'-5'-exoribonuclease family protein; FUNCTIONS IN: 3'-5'-exoribonuclease activity, RNA binding; INVOLVED IN: RNA processing; LOCATED IN: cellular_component unknown; EXPRESSED IN: 20 plant structures; EXPRESSED DURING: 12 growth stages; CONTAINS InterPro DOMAIN/s: Exoribonuclease, phosphorolytic domain 2 (InterPro:IPR01584…
'27.1.3.1'	'RNA.processing.3' end processing.PAP'	HORVU4Hr1G011370,13	-8.32193	7.28682e-61	'(loc_os06g21470.1 : 729.0) no description available & (at1g17980 : 524.0) Encodes a poly(A) polymerase. Located in the nucleus.; poly(A) polymerase 1 (PAPS1); CONTAINS InterPro DOMAIN/s: Poly(A) polymerase (InterPro:IPR014492), Poly(A) polymerase, central domain (InterPro:IPR007012), Nucleotidyltransferase, class I, C-terminal-like (InterPro:IPR011068), Poly(A) polymerase, RNA-binding domain (In…
'27.1.3.10'	'RNA.processing.3' end processing.CstF50'	HORVU5Hr1G095960,3	-8.62205	7.8884e-46	'(loc_os03g54770.1 : 662.0) no description available & (at5g60940 : 509.0) Transducin/WD40 repeat-like superfamily protein; CONTAINS InterPro DOMAIN/s: WD40 repeat 2 (InterPro:IPR019782), WD40 repeat-like-containing domain (InterPro:IPR011046), WD40 repeat, conserved site (InterPro:IPR019775), WD40-repeat-containing domain (InterPro:IPR017986), WD40/YVTN repeat-like-containing domain (InterPro:IP…
'27.2'	'RNA.transcription'	HORVU3Hr1G019090,12	-8.42626	2.2501e-65	'(loc_os05g23940.1 : 637.0) no description available & (at3g09360 : 307.0) Cyclin/Brf1-like TBP-binding protein; FUNCTIONS IN: RNA polymerase II transcription factor activity, transcription regulator activity, transcription activator activity, zinc ion binding, translation initiation factor activity; INVOLVED IN: translational initiation, positive regulation of transcription, regulation of transc…
'27.2'	'RNA.transcription'	HORVU5Hr1G092840,35	-8.57365	1.81952e-33	'(loc_os03g44484.1 : 2277.0) no description available & (at4g21710 : 2140.0) Encodes the unique second-largest subunit of DNA-dependent RNA polymerase II; the ortholog of budding yeast RPB2 and a homolog of the E. coli RNA polymerase beta subunit.; NRPB2; CONTAINS InterPro DOMAIN/s: DNA-directed RNA polymerase, subunit 2, domain 6 (InterPro:IPR007120), RNA polymerase Rpb2, domain 7 (InterPro:IPR0…
'27.3.11'	'RNA.regulation of transcription.C2H2 zinc finger family'	HORVU7Hr1G097860,7	-8.29002	4.79128e-53	'(loc_os06g48530.1 : 914.0) no description available & (at2g27100 : 642.0) Identified as a leaf form mutant by Redei having serrated leaves. Further analysis of the single loss of function allele indicated pleiotropic effects extending to many aspects of shoot development such as taller meristems, alterations in phase transition, phyllotaxy and branching. Encodes a single zinc finger containing p…
'27.3.17'	'RNA.regulation of transcription.CPP(Zn),CPP1-related transcription factor family'	HORVU5Hr1G013160,7	-8.67243	7.01082e-45	'(loc_os12g41210.1 : 542.0) no description available & (at4g14770 : 155.0) TESMIN/TSO1-like CXC 2 (TCX2); FUNCTIONS IN: sequence-specific DNA binding transcription factor activity; INVOLVED IN: regulation of transcription; LOCATED IN: chloroplast; EXPRESSED IN: 16 plant structures; EXPRESSED DURING: 9 growth stages; CONTAINS InterPro DOMAIN/s: Tesmin/TSO1-like, CXC (InterPro:IPR005172); BEST Arab…
'27.3.25'	'RNA.regulation of transcription.MYB domain transcription factor family'	HORVU1Hr1G008810,5	-8.21917	8.81494e-25	'(q4jl76|myba2_orysa : 199.0) Myb-related protein MYBAS2 - Oryza sativa (Rice) & (loc_os12g37970.1 : 199.0) no description available & (at3g46130 : 197.0) Encodes a putative transcription factor (MYB48) that functions to regulate flavonol biosynthesis primarily in cotyledons.; myb domain protein 48 (MYB48); CONTAINS InterPro DOMAIN/s: SANT, DNA-binding (InterPro:IPR001005), Myb, DNA-binding (Inte…
'27.3.27'	'RNA.regulation of transcription.NAC domain transcription factor family'	HORVU6Hr1G023040,2	-8.31288	8.28918e-67	'(loc_os02g05900.1 : 295.0) no description available & (at3g13000 : 165.0) Protein of unknown function, DUF547; FUNCTIONS IN: sequence-specific DNA binding transcription factor activity; INVOLVED IN: regulation of transcription; LOCATED IN: vacuole; EXPRESSED IN: 22 plant structures; EXPRESSED DURING: 13 growth stages; CONTAINS InterPro DOMAIN/s: Protein of unknown function DUF547 (InterPro:IPR00…
'27.3.34'	'RNA.regulation of transcription.Orphan family'	HORVU3Hr1G033370,6	-8.81698	6.70836e-33	'(loc_os01g14040.1 : 122.0) no description available & (at4g18460 : 112.0) D-Tyr-tRNA(Tyr) deacylase family protein; FUNCTIONS IN: hydrolase activity, acting on ester bonds; INVOLVED IN: D-amino acid catabolic process; LOCATED IN: cytoplasm; EXPRESSED IN: 16 plant structures; EXPRESSED DURING: 13 growth stages; CONTAINS InterPro DOMAIN/s: D-tyrosyl-tRNA(Tyr) deacylase (InterPro:IPR003732); Has 30…
'27.3.46'	'RNA.regulation of transcription.DNA methyltransferases'	HORVU0Hr1G039040,6	-8.53528	5.9489e-143	'(at4g14140 : 698.0) This gene is predicted to encode a DNA methyltransferase. A plant line expressing an RNAi construct directed against DMT2 has reduced agrobacterium-mediated tumor formation.; DNA methyltransferase 2 (DMT2); FUNCTIONS IN: DNA binding, DNA (cytosine-5-)-methyltransferase activity; INVOLVED IN: DNA mediated transformation, DNA methylation; LOCATED IN: nucleus; CONTAINS InterPro …
'27.3.52'	'RNA.regulation of transcription.Global transcription factor group'	HORVU2Hr1G010380,6	-8.35315	3.8089e-97	'(q7x923|spt16_orysa : 1552.0) FACT complex subunit SPT16 (Facilitates chromatin transcription complex subunit SPT16) - Oryza sativa (Rice) & (loc_os04g25550.1 : 1552.0) no description available & (at4g10710 : 1253.0) encodes a component of the FAcilitates Chromatin Transcription (FACT) complex, SPT16.Along with SSRP1 binds to the promoter of FLC.; global transcription factor C (SPT16); INVOLVED …
'27.3.55'	'RNA.regulation of transcription.HDA'	HORVU6Hr1G038010,7	-8.27612	1.29875e-38	'(loc_os08g25570.1 : 503.0) no description available & (at5g63110 : 360.0) RPD3-like histone deacetylase. HDA6 mutations specifically increase the expression of auxin-responsive transgenes, suggesting a role in transgene silencing.; histone deacetylase 6 (HDA6); FUNCTIONS IN: histone deacetylase activity; INVOLVED IN: response to salt stress, gene silencing, posttranscriptional gene silencing, re…
'27.3.59'	'RNA.regulation of transcription.Methyl binding domain proteins'	HORVU7Hr1G051810,2	-8.3837	1.47451e-14	'(loc_os09g32090.2 : 130.0) no description available & (at5g35330 : 105.0) Protein containing methyl-CpG-binding domain.Has sequence similarity to human MBD proteins.; methyl-CPG-binding domain protein 02 (MBD02); CONTAINS InterPro DOMAIN/s: DNA-binding, integrase-type (InterPro:IPR016177), Methyl-CpG DNA binding (InterPro:IPR001739), Zinc finger, CW-type (InterPro:IPR011124); BEST Arabidopsis th…
'27.3.6'	'RNA.regulation of transcription.bHLH,Basic Helix-Loop-Helix family'	HORVU2Hr1G060680,2	-8.88874	5.83546e-103	'(loc_os07g05010.3 : 202.0) no description available & (at3g59060 : 95.5) Encodes a novel Myc-related bHLH transcription factor, which physically associated with APRR1/TOC1 and is a member of PIF3 transcription factor family. Involved in shade avoidance. Functions as negative regulator of PhyB. Protein levels are modulated by phytochrome B.; phytochrome interacting factor 3-like 6 (PIL6); FUNCTIO…
'27.3.6'	'RNA.regulation of transcription.bHLH,Basic Helix-Loop-Helix family'	HORVU7Hr1G026560,10	-8.84549	4.01042e-43	'(loc_os06g06900.1 : 265.0) no description available & (at4g36930 : 114.0) Encodes a transcription factor of the bHLH protein family. Mutants have abnormal, unfused carpels and reduced seed dormancy.; SPATULA (SPT); CONTAINS InterPro DOMAIN/s: Helix-loop-helix DNA-binding domain (InterPro:IPR001092), Helix-loop-helix DNA-binding (InterPro:IPR011598); BEST Arabidopsis thaliana protein match is: ba…
'27.3.60'	'RNA.regulation of transcription.NIN-like bZIP-related family'	HORVU2Hr1G095940,17	-8.6865	1.67973e-33	'(loc_os04g47640.1 : 177.0) no description available & (at4g35590 : 93.2) RWP-RK domain-containing protein; FUNCTIONS IN: sequence-specific DNA binding transcription factor activity; INVOLVED IN: regulation of transcription; LOCATED IN: endomembrane system; EXPRESSED IN: 12 plant structures; EXPRESSED DURING: 4 anthesis, petal differentiation and expansion stage, LP.12 twelve leaves visible, D bi…
'27.3.66'	'RNA.regulation of transcription.Psudo ARR transcription factor family'	HORVU4Hr1G021000,6	-9.40939	8.3193e-108	'(loc_os11g05930.3 : 662.0) no description available & (q689g6|prr95_orysa : 90.5) Two-component response regulator-like PRR95 (Pseudo-response regulator 95) (OsPRR95) - Oryza sativa (Rice) & (at5g60100 : 85.9) Encodes pseudo-response regulator 3 (APRR3/PRR3). PRR3 transcript levels vary in a circadian pattern with peak expression at dusk under long and short day conditions. PRR3 affects the peri…
'27.3.67'	'RNA.regulation of transcription.putative transcription regulator'	HORVU2Hr1G105390,2	-10.4717	2.98688e-186	'(loc_os12g38440.3 : 263.0) no description available & (at1g15910 : 101.0) XH/XS domain-containing protein; CONTAINS InterPro DOMAIN/s: Domain of unknown function XS (InterPro:IPR005380), Domain of unknown function XH (InterPro:IPR005379), Domain of unknown function, putative Zinc finger, XS/XH (InterPro:IPR005381); BEST Arabidopsis thaliana protein match is: XH/XS domain-containing protein (TAIR…
'27.3.67'	'RNA.regulation of transcription.putative transcription regulator'	HORVU3Hr1G035230,11	-8.5157	3.7894e-141	'(loc_os03g51870.1 : 161.0) no description available & (at3g02400 : 92.4) SMAD/FHA domain-containing protein ; FUNCTIONS IN: DNA binding; INVOLVED IN: regulation of transcription, DNA-dependent; LOCATED IN: nucleus; EXPRESSED IN: 21 plant structures; EXPRESSED DURING: 11 growth stages; CONTAINS InterPro DOMAIN/s: AT hook, DNA-binding motif (InterPro:IPR017956), SMAD/FHA domain (InterPro:IPR008984…
'27.3.67'	'RNA.regulation of transcription.putative transcription regulator'	HORVU7Hr1G000820,8	-8.224	1.67973e-33	'(loc_os12g19590.1 : 240.0) no description available & (at2g47790 : 167.0) Transducin/WD40 repeat-like superfamily protein; CONTAINS InterPro DOMAIN/s: WD40 repeat-like-containing domain (InterPro:IPR011046), WD40 repeat 2 (InterPro:IPR019782), WD40-repeat-containing domain (InterPro:IPR017986), WD40 repeat (InterPro:IPR001680), WD40/YVTN repeat-like-containing domain (InterPro:IPR015943), WD40 r…
'27.3.69'	'RNA.regulation of transcription.SET-domain transcriptional regulator family'	HORVU5Hr1G057440,2	-8.3443	1.56217e-134	'(loc_os09g19830.1 : 948.0) no description available & (at2g22740 : 493.0) Encodes a SU(VAR)3-9 homolog, a methyltransferase involved in histone methylation. The protein was shown to bind to methylated cytosines of CG, CNG and CNN motifs but has a preference for the latter two. This is a member of a subfamily of SET proteins that shares a conserved SRA domain.; SU(VAR)3-9 homolog 6 (SUVH6); FUNCT…
'27.3.9'	'RNA.regulation of transcription.C2C2(Zn) GATA transcription factor family'	HORVU3Hr1G117680,43	-9.60733	1.47069e-85	'(loc_os03g61570.2 : 143.0) no description available & (at3g16870 : 93.6) Encodes a member of the GATA factor family of zinc finger transcription factors.; GATA transcription factor 17 (GATA17); FUNCTIONS IN: sequence-specific DNA binding transcription factor activity; INVOLVED IN: regulation of transcription, DNA-dependent; EXPRESSED IN: 24 plant structures; EXPRESSED DURING: 15 growth stages; C…
'27.3.99'	'RNA.regulation of transcription.unclassified'	HORVU5Hr1G103190,10	-8.36632	2.13826e-31	'(loc_os03g57130.1 : 434.0) no description available & (at3g20800 : 377.0) Cell differentiation, Rcd1-like protein; CONTAINS InterPro DOMAIN/s: Cell differentiation, Rcd1-like (InterPro:IPR007216); BEST Arabidopsis thaliana protein match is: Cell differentiation, Rcd1-like protein (TAIR:AT5G12980.1); Has 491 Blast hits to 488 proteins in 205 species: Archae - 0; Bacteria - 0; Metazoa - 160; Fungi…
'27.3.99'	'RNA.regulation of transcription.unclassified'	HORVU6Hr1G040680,2	-9.19967	8.04174e-86	'(loc_os02g13810.1 : 445.0) no description available & (at1g53490 : 313.0) RING/U-box superfamily protein; Has 175 Blast hits to 173 proteins in 83 species: Archae - 2; Bacteria - 14; Metazoa - 69; Fungi - 24; Plants - 38; Viruses - 0; Other Eukaryotes - 28 (source: NCBI BLink). & (reliability: 626.0) & (original description: no original description)'
'27.4'	'RNA.RNA binding'	HORVU1Hr1G036640,20	-8.34873	1.16223e-59	'(loc_os10g30370.1 : 490.0) no description available & (at5g09880 : 360.0) Splicing factor, CC1-like; FUNCTIONS IN: RNA binding, nucleotide binding, nucleic acid binding; INVOLVED IN: mRNA processing; LOCATED IN: nucleus; EXPRESSED IN: 25 plant structures; EXPRESSED DURING: 15 growth stages; CONTAINS InterPro DOMAIN/s: RNA recognition motif, RNP-1 (InterPro:IPR000504), Splicing factor, CC1-like (…
'27.4'	'RNA.RNA binding'	HORVU7Hr1G078140,7	-9.61102	1.0237e-83	'(loc_os03g61990.5 : 107.0) no description available & (at3g26420 : 105.0) Zinc finger-containing glycine-rich RNA-binding protein. Cold-inducible. Contributes to the enhancement of freezing tolerance.; ATRZ-1A; CONTAINS InterPro DOMAIN/s: RNA recognition motif, RNP-1 (InterPro:IPR000504), Nucleotide-binding, alpha-beta plait (InterPro:IPR012677), Zinc finger, CCHC-type (InterPro:IPR001878); BEST…
'27.4'	'RNA.RNA binding'	HORVU5Hr1G078170,26	-8.21917	1.08504e-38	'(loc_os09g33870.1 : 272.0) no description available & (at2g43370 : 215.0) RNA-binding (RRM/RBD/RNP motifs) family protein; FUNCTIONS IN: RNA binding, nucleotide binding, nucleic acid binding; INVOLVED IN: biological_process unknown; LOCATED IN: nucleus; CONTAINS InterPro DOMAIN/s: RNA recognition motif, RNP-1 (InterPro:IPR000504), Nucleotide-binding, alpha-beta plait (InterPro:IPR012677); BEST A…
'28.1'	'DNA.synthesis/chromatin structure'	HORVU3Hr1G018130,5	-8.32193	1.60165e-42	'(loc_os01g07080.2 : 613.0) no description available & (at5g05450 : 476.0) P-loop containing nucleoside triphosphate hydrolases superfamily protein; FUNCTIONS IN: helicase activity, nucleic acid binding, ATP-dependent helicase activity, ATP binding; INVOLVED IN: biological_process unknown; LOCATED IN: cellular_component unknown; EXPRESSED IN: 21 plant structures; EXPRESSED DURING: 13 growth stage…
'28.1'	'DNA.synthesis/chromatin structure'	HORVU3Hr1G089480,15	-8.70044	2.06668e-212	'(loc_os01g67250.1 : 353.0) no description available & (at5g16270 : 107.0) Encodes a SCC1/REC8 ortholog that may be involved in mitosis and may represent a mitotic cohesin.; sister chromatid cohesion 1 protein 4 (SYN4); FUNCTIONS IN: molecular_function unknown; INVOLVED IN: sister chromatid cohesion; LOCATED IN: nuclear chromosome; EXPRESSED IN: 22 plant structures; EXPRESSED DURING: 13 growth st…
'28.1'	'DNA.synthesis/chromatin structure'	HORVU7Hr1G034080,18	-8.52356	6.94812e-70	'(loc_os06g09890.2 : 803.0) no description available & (at2g26280 : 387.0) smr (Small MutS Related) domain-containing protein mRNA, complete cds; CID7; FUNCTIONS IN: damaged DNA binding, protein binding, ATP binding; INVOLVED IN: mismatch repair; LOCATED IN: chloroplast; EXPRESSED IN: 22 plant structures; EXPRESSED DURING: 13 growth stages; CONTAINS InterPro DOMAIN/s: Smr protein/MutS2 C-terminal…
'28.1'	'DNA.synthesis/chromatin structure'	HORVU7Hr1G071710,14	-8.29002	1.10821e-68	'(loc_os08g05840.1 : 749.0) no description available & (at5g55310 : 419.0) Encodes one of two Arabidopsis type-I DNA topoisomerase I genes. Reducing the level of expression of this gene in a top1alpha (At5g55300) mutant background causes seedling lethality.; DNA topoisomerase 1 beta (TOP1BETA); FUNCTIONS IN: DNA topoisomerase type I activity; INVOLVED IN: DNA topological change; LOCATED IN: membr…
'28.1'	'DNA.synthesis/chromatin structure'	HORVU6Hr1G016670,3	-8.48382	7.26218e-18	'(loc_os03g20580.1 : 252.0) no description available & (at2g39300 : 116.0) unknown protein; INVOLVED IN: biological_process unknown; EXPRESSED IN: 8 plant structures; EXPRESSED DURING: 4 anthesis, petal differentiation and expansion stage; BEST Arabidopsis thaliana protein match is: unknown protein (TAIR:AT3G55060.1). & (reliability: 214.0) & (original description: no original description)'
'28.2'	'DNA.repair'	HORVU6Hr1G029760,4	-8.34873	2.67914e-32	'(loc_os02g08300.2 : 221.0) no description available & (at1g79650 : 186.0) Encodes a member of the RADIATION SENSITIVE23 (RAD23) family: AT1G16190(RAD23A), AT1G79650(RAD23B), AT3G02540(RAD23C), AT5G38470(RAD23D). RAD23 proteins play an essential role in the cell cycle, morphology, and fertility of plants through their delivery of UPS (ubiquitin/26S proteasome system) substrates to the 26S proteas…
'28.99'	'DNA.unspecified'	HORVU3Hr1G074190,9	-8.47573	8.27292e-37	'(loc_os01g55900.1 : 287.0) no description available & (at3g52905 : 155.0) Polynucleotidyl transferase, ribonuclease H-like superfamily protein; FUNCTIONS IN: hydrolase activity, acting on ester bonds, nucleic acid binding; INVOLVED IN: DNA repair, response to DNA damage stimulus, nucleobase, nucleoside, nucleotide and nucleic acid metabolic process, DNA recombination; LOCATED IN: cytoplasm; CONT…
'29.1'	'protein.aa activation'	HORVU3Hr1G081060,11	-8.6865	7.31876e-30	'(loc_os01g60660.1 : 429.0) no description available & (at2g40660 : 210.0) Nucleic acid-binding, OB-fold-like protein; FUNCTIONS IN: tRNA binding; INVOLVED IN: tRNA aminoacylation for protein translation; EXPRESSED IN: 22 plant structures; EXPRESSED DURING: 14 growth stages; CONTAINS InterPro DOMAIN/s: Nucleic acid-binding, OB-fold-like (InterPro:IPR016027), Nucleic acid-binding, OB-fold (InterPr…
'29.1'	'protein.aa activation'	HORVU5Hr1G019600,2	-8.44294	5.71432e-23	'(at5g03240 : 335.0) encodes ubiquitin that is attached to proteins destined for degradation. UBQ3 is most homologous with UBQ4, and is expressed in higher levels in vegetative tissue but lower levels in flowers than UBQ4. UBQ3 encodes different number of ubiquitins in different ecotypes. UBQ3 transcript level is modulated by UV-B and light/dark treatments.; polyubiquitin 3 (UBQ3); INVOLVED IN: p…
'29.1.1'	'protein.aa activation.tyrosine-tRNA ligase'	HORVU0Hr1G021230,4	-8.41363	2.67914e-32	'(loc_os08g05490.1 : 275.0) no description available & (at2g33840 : 224.0) Tyrosyl-tRNA synthetase, class Ib, bacterial/mitochondrial; FUNCTIONS IN: tyrosine-tRNA ligase activity, nucleotide binding, aminoacyl-tRNA ligase activity, ATP binding; INVOLVED IN: translation, tRNA aminoacylation for protein translation, tyrosyl-tRNA aminoacylation; LOCATED IN: cytoplasm; CONTAINS InterPro DOMAIN/s: Ros…
'29.1.20'	'protein.aa activation.phenylalanine-tRNA ligase'	HORVU5Hr1G026140,1	-9.45121	3.21164e-85	'(loc_os12g34860.1 : 712.0) no description available & (at3g58140 : 630.0) phenylalanyl-tRNA synthetase class IIc family protein; FUNCTIONS IN: in 6 functions; INVOLVED IN: tRNA processing, phenylalanyl-tRNA aminoacylation, translation, tRNA aminoacylation, tRNA aminoacylation for protein translation; LOCATED IN: mitochondrion, chloroplast, membrane; EXPRESSED IN: 23 plant structures; EXPRESSED D…
'29.2.1.1.3.2.510'	'protein.synthesis.ribosomal protein.prokaryotic.unknown organellar.50S subunit.L10A'	HORVU7Hr1G059090,3	-8.87036	1.34062e-32	'(loc_os08g44450.2 : 360.0) no description available & (at2g27530 : 342.0) Encodes ribosomal protein L10aP. Identified in a screen for enhancers of as1. as1/pgy double mutants show defects in leaf vascular patterning and adaxial cell fate. Double mutant analysis indicates pgy genes function in the same pathway as REV, KAN1 and KAN2.; PIGGYBACK1 (PGY1); FUNCTIONS IN: structural constituent of ribo…
'29.2.1.2.1.10'	'protein.synthesis.ribosomal protein.eukaryotic.40S subunit.S10'	HORVU3Hr1G111760,4	-8.36632	9.43016e-22	'(loc_os01g73160.1 : 166.0) no description available & (q9ayp4|rs10_orysa : 160.0) 40S ribosomal protein S10 - Oryza sativa (Rice) & (at5g52650 : 150.0) RNA binding Plectin/S10 domain-containing protein; FUNCTIONS IN: structural constituent of ribosome; INVOLVED IN: translation; LOCATED IN: cytosolic small ribosomal subunit, cytosolic ribosome, cell wall, membrane; EXPRESSED IN: 22 plant structur…
'29.2.1.2.1.11'	'protein.synthesis.ribosomal protein.eukaryotic.40S subunit.S11'	HORVU2Hr1G099230,3	-8.71425	4.56258e-34	'(loc_os08g10608.1 : 307.0) no description available & (p25460|rs11_maize : 303.0) 40S ribosomal protein S11 - Zea mays (Maize) & (at5g23740 : 289.0) Encodes a putative ribosomal protein S11 (RPS11-beta).; ribosomal protein S11-beta (RPS11-BETA); FUNCTIONS IN: structural constituent of ribosome; INVOLVED IN: translation; LOCATED IN: cytosolic small ribosomal subunit, membrane; EXPRESSED IN: 22 pl…
'29.2.1.2.1.6'	'protein.synthesis.ribosomal protein.eukaryotic.40S subunit.S6'	HORVU2Hr1G010870,13	-13.773	0	'(loc_os07g42950.1 : 296.0) no description available & (at5g10360 : 288.0) RPS6A and RPS6B are fully redundant and essential during gametogenesis.; embryo defective 3010 (EMB3010); CONTAINS InterPro DOMAIN/s: Ribosomal protein S6e (InterPro:IPR001377), Ribosomal protein S6e, conserved site (InterPro:IPR018282); BEST Arabidopsis thaliana protein match is: ribosomal protein S6 (TAIR:AT4G31700.1). &…
'29.2.1.2.2.11'	'protein.synthesis.ribosomal protein.eukaryotic.60S subunit.L11'	HORVU1Hr1G028820,4	-10.1189	1.47961e-50	'(loc_os02g14059.1 : 309.0) no description available & (o22540|rl11_orysa : 308.0) 60S ribosomal protein L11 - Oryza sativa (Rice) & (at5g45775 : 301.0) Ribosomal L5P family protein; FUNCTIONS IN: structural constituent of ribosome; INVOLVED IN: translation; LOCATED IN: cytosolic large ribosomal subunit, vacuole; EXPRESSED IN: male gametophyte, leaf; CONTAINS InterPro DOMAIN/s: Ribosomal protein …
'29.2.1.2.2.14'	'protein.synthesis.ribosomal protein.eukaryotic.60S subunit.L14'	HORVU6Hr1G058560,3	-8.89178	1.48859e-15	'(loc_os04g43540.1 : 224.0) no description available & (at2g20450 : 197.0) Ribosomal protein L14; FUNCTIONS IN: structural constituent of ribosome; INVOLVED IN: translation, ribosome biogenesis; LOCATED IN: ribosome, cytosolic large ribosomal subunit, endoplasmic reticulum, vacuole; EXPRESSED IN: 23 plant structures; EXPRESSED DURING: 13 growth stages; CONTAINS InterPro DOMAIN/s: Ribosomal protei…
'29.2.1.2.2.34'	'protein.synthesis.ribosomal protein.eukaryotic.60S subunit.L34'	HORVU7Hr1G052270,5	-8.68299	1.65533e-66	'(loc_os08g40820.2 : 425.0) no description available & (at3g20260 : 240.0) FUNCTIONS IN: structural constituent of ribosome; INVOLVED IN: translation; LOCATED IN: ribosome, intracellular; EXPRESSED IN: 16 plant structures; EXPRESSED DURING: 7 growth stages; CONTAINS InterPro DOMAIN/s: Ribosomal protein L34e (InterPro:IPR008195), Protein of unknown function DUF1666 (InterPro:IPR012870); BEST Arabi…
'29.2.1.2.2.523'	'protein.synthesis.ribosomal protein.eukaryotic.60S subunit.L23A'	HORVU2Hr1G086390,5	-8.65105	7.77276e-09	'(loc_os04g42270.3 : 130.0) no description available & (q07761|rl23a_tobac : 115.0) 60S ribosomal protein L23a (L25) - Nicotiana tabacum (Common tobacco) & (at3g55280 : 108.0) 60S ribosomal protein L23A (RPL23aB). Paralog of RPL23aA.; ribosomal protein L23AB (RPL23AB); FUNCTIONS IN: structural constituent of ribosome, RNA binding, nucleotide binding; INVOLVED IN: response to oxidative stress, res…
'29.2.1.2.2.537'	'protein.synthesis.ribosomal protein.eukaryotic.60S subunit.L37A'	HORVU3Hr1G062590,2	-11.7993	5.44734e-74	'(q5qm99|rl37a_orysa : 189.0) 60S ribosomal protein L37a - Oryza sativa (Rice) & (loc_os05g48320.1 : 189.0) no description available & (at3g10950 : 180.0) Zinc-binding ribosomal protein family protein; FUNCTIONS IN: structural constituent of ribosome; INVOLVED IN: translation, ribosome biogenesis; LOCATED IN: ribosome, cytosolic large ribosomal subunit; CONTAINS InterPro DOMAIN/s: Ribosomal prote…
'29.2.1.2.2.80'	'protein.synthesis.ribosomal protein.eukaryotic.60S subunit.P0'	HORVU7Hr1G073720,10	-8.28077	4.3415e-28	'(loc_os12g03880.1 : 486.0) no description available & (p41095|rla0_orysj : 484.0) 60S acidic ribosomal protein P0 OS=Oryza sativa subsp. japonica GN=Os08g0130500 PE=1 SV=3 & (at2g40010 : 429.0) Ribosomal protein L10 family protein; FUNCTIONS IN: structural constituent of ribosome; INVOLVED IN: translational elongation, translation, ribosome biogenesis; LOCATED IN: cytosolic ribosome, ribosome; E…
'29.2.1.99.1.9'	'protein.synthesis.ribosomal protein.unknown.small subunit.S9'	HORVU2Hr1G023120,5	-8.40088	7.26218e-18	'(loc_os07g46440.1 : 478.0) no description available & (at3g49080 : 336.0) Ribosomal protein S5 domain 2-like superfamily protein; FUNCTIONS IN: structural constituent of ribosome; INVOLVED IN: translation; LOCATED IN: cytosolic small ribosomal subunit, ribosome, intracellular; EXPRESSED IN: 23 plant structures; EXPRESSED DURING: 13 growth stages; CONTAINS InterPro DOMAIN/s: Ribosomal protein S9 …
'29.2.1.99.99'	'protein.synthesis.ribosomal protein.unknown.unknown'	HORVU2Hr1G023480,2	-8.20945	1.73831e-21	'(loc_os07g46330.1 : 310.0) no description available & (at5g13720 : 273.0) Uncharacterised protein family (UPF0114); LOCATED IN: chloroplast, chloroplast inner membrane, chloroplast envelope; EXPRESSED IN: 21 plant structures; EXPRESSED DURING: 13 growth stages; CONTAINS InterPro DOMAIN/s: Uncharacterised protein family UPF0114, plant (InterPro:IPR016804), Uncharacterised protein family UPF0114 (…
'29.2.2.1'	'protein.synthesis.ribosome biogenesis.export from nucleus'	HORVU5Hr1G007910,9	-8.64746	7.05924e-67	'(loc_os12g42370.1 : 765.0) no description available & (at1g08410 : 575.0) P-loop containing nucleoside triphosphate hydrolases superfamily protein; FUNCTIONS IN: GTP binding; INVOLVED IN: biological_process unknown; LOCATED IN: intracellular; EXPRESSED IN: 18 plant structures; EXPRESSED DURING: 13 growth stages; CONTAINS InterPro DOMAIN/s: GTP1/OBG (InterPro:IPR006073), GTP-binding protein, HSR1…
'29.2.2.3.5'	'protein.synthesis.ribosome biogenesis.Pre-rRNA processing and modifications.DExD-box helicases'	HORVU6Hr1G094560,4	-8.40939	2.03888e-40	'(loc_os03g36930.1 : 649.0) no description available & (p41380|if4a3_nicpl : 620.0) Eukaryotic initiation factor 4A-3 (EC 3.6.1.-) (ATP-dependent RNA helicase eIF4A-3) (eIF-4A-3) - Nicotiana plumbaginifolia (Leadwort-leaved tobacco) & (at3g19760 : 610.0) Encodes an RNA helicase that may be a component of the Exon Junction Complex. Subcellular localization is modulated by stress. Under normal cond…
'29.2.3'	'protein.synthesis.initiation'	HORVU3Hr1G006000,10	-8.68299	9.60754e-96	'(loc_os01g03070.1 : 1141.0) no description available & (q9xhr2|if3a_maize : 1082.0) Eukaryotic translation initiation factor 3 subunit 10 (eIF-3 theta) (Eukaryotic translation initiation factor 3 large subunit) (eIF3a) - Zea mays (Maize) & (at4g11420 : 924.0) Encodes a subunit of eukaryotic initiation factor 3 (eIF3), a multisubunit complex that is required for binding of mRNA to 40 S ribosomal …
'29.2.3'	'protein.synthesis.initiation'	HORVU4Hr1G035210,3	-8.31741	6.60276e-36	'(loc_os11g21990.1 : 741.0) no description available & (at5g36230 : 626.0) ARM repeat superfamily protein; FUNCTIONS IN: binding, translation initiation factor activity; INVOLVED IN: regulation of translational initiation; LOCATED IN: membrane; EXPRESSED IN: 24 plant structures; EXPRESSED DURING: 13 growth stages; CONTAINS InterPro DOMAIN/s: eIF4-gamma/eIF5/eIF2-epsilon (InterPro:IPR003307), Arma…
'29.2.3'	'protein.synthesis.initiation'	HORVU1Hr1G039260,1	-9.17991	2.27836e-19	'(q03389|if4e2_wheat : 396.0) Eukaryotic translation initiation factor 4E-2 (eIF4E-2) (eIF-4E-2) (mRNA cap-binding protein) (eIF-(iso)4F 25 kDa subunit) (eIF-(iso)4F p28 subunit) - Triticum aestivum (Wheat) & (loc_os10g32970.1 : 335.0) no description available & (at5g35620 : 244.0) Cap-binding protein, binds to the 5' cap structure of nuclear-encoded mRNAs. Mutant is resistant to potyvirus infect…
'29.2.4'	'protein.synthesis.elongation'	HORVU2Hr1G031450,6	-8.39232	8.95592e-22	'(loc_os07g42300.2 : 265.0) no description available & (q40680|ef1d1_orysa : 264.0) Elongation factor 1-delta 1 (EF-1-delta 1) (Elongation factor 1B-beta 1) (eEF-1B beta 1) - Oryza sativa (Rice) & (at1g30230 : 227.0) Glutathione S-transferase, C-terminal-like;Translation elongation factor EF1B/ribosomal protein S6; FUNCTIONS IN: translation elongation factor activity; INVOLVED IN: translational e…
'29.3'	'protein.targeting'	HORVU2Hr1G024840,8	-9.11114	1.82457e-61	'(loc_os07g45300.1 : 407.0) no description available & (at5g27395 : 275.0) Mitochondrial inner membrane translocase complex, subunit Tim44-related protein; FUNCTIONS IN: P-P-bond-hydrolysis-driven protein transmembrane transporter activity; INVOLVED IN: intracellular protein transport; LOCATED IN: mitochondrion, mitochondrial inner membrane presequence translocase complex; EXPRESSED IN: 22 plant …
'29.3.4.3'	'protein.targeting.secretory pathway.vacuole'	HORVU1Hr1G032780,3	-8.43879	7.05924e-67	'(loc_os10g20630.1 : 258.0) no description available & (p93484|vsr1_pea : 211.0) Vacuolar sorting receptor 1 precursor (BP-80) (80 kDa proaleurein-binding protein) - Pisum sativum (Garden pea) & (at2g14720 : 210.0) encodes a vacuolar sorting receptor; vacuolar sorting receptor 4 (VSR4); FUNCTIONS IN: calcium ion binding; INVOLVED IN: protein targeting to vacuole; LOCATED IN: trans-Golgi network, …
'29.3.4.3'	'protein.targeting.secretory pathway.vacuole'	HORVU2Hr1G017770,1	-8.62205	5.92878e-100	'(loc_os07g48229.1 : 942.0) no description available & (at3g52850 : 773.0) Encodes the Vacuolar Sorting Receptor-1 (VSR-1)/Epidermal Growth Factor Receptor-like protein1(VSR-1/ATELP1). Binds vacuolar targeting signals. Involved in sorting seed storage proteins into vacuoles.; vacuolar sorting receptor homolog 1 (VSR1); FUNCTIONS IN: amino-terminal vacuolar sorting propeptide binding; INVOLVED IN:…
'29.3.4.99'	'protein.targeting.secretory pathway.unspecified'	HORVU3Hr1G037050,6	-8.76818	4.52352e-37	'(loc_os01g16000.1 : 310.0) no description available & (at1g22180 : 216.0) Sec14p-like phosphatidylinositol transfer family protein; CONTAINS InterPro DOMAIN/s: Cellular retinaldehyde-binding/triple function, C-terminal (InterPro:IPR001251); BEST Arabidopsis thaliana protein match is: Sec14p-like phosphatidylinositol transfer family protein (TAIR:AT4G08690.1); Has 35333 Blast hits to 34131 protei…
'29.3.4.99'	'protein.targeting.secretory pathway.unspecified'	HORVU6Hr1G073370,3	-8.82655	1.65329e-36	'(loc_os02g49980.1 : 254.0) no description available & (at5g37680 : 244.0) A member of ARF-like GTPase family. A thaliana has 21 members, in two subfamilies, ARF and ARL GTPases.; ADP-ribosylation factor-like A1A (ARLA1A); FUNCTIONS IN: GTP binding; LOCATED IN: endomembrane system; EXPRESSED IN: 22 plant structures; EXPRESSED DURING: 13 growth stages; CONTAINS InterPro DOMAIN/s: Small GTP-binding…
'29.4'	'protein.postranslational modification'	HORVU5Hr1G011940,13	-8.62205	4.79128e-53	'(loc_os12g19290.1 : 849.0) no description available & (at4g14350 : 761.0) AGC (cAMP-dependent, cGMP-dependent and protein kinase C) kinase family protein; FUNCTIONS IN: protein kinase activity, kinase activity, ATP binding; INVOLVED IN: protein amino acid phosphorylation; LOCATED IN: cytosol, nucleus, plasma membrane, cytoplasm, phragmoplast; EXPRESSED IN: 23 plant structures; EXPRESSED DURING: …
'29.4'	'protein.postranslational modification'	HORVU7Hr1G058950,3	-9.44915	1.20377e-96	'(loc_os08g44280.1 : 370.0) no description available & (q43209|pimt_wheat : 293.0) Protein-L-isoaspartate O-methyltransferase (EC 2.1.1.77) (Protein-beta-aspartate methyltransferase) (PIMT) (Protein L-isoaspartyl methyltransferase) (L-isoaspartyl protein carboxyl methyltransferase) - Triticum aestivum (Wheat) & (at3g48330 : 290.0) encodes protein-L-isoaspartate methyltransferase. Important for ma…
'29.4'	'protein.postranslational modification'	HORVU7Hr1G082710,5	-9.60733	4.3415e-28	'(loc_os06g27760.1 : 251.0) no description available & (at1g53670 : 233.0) methionine sulfoxide reductase B 1 (MSRB1); FUNCTIONS IN: peptide-methionine-(S)-S-oxide reductase activity; INVOLVED IN: response to oxidative stress; LOCATED IN: chloroplast; EXPRESSED IN: 23 plant structures; EXPRESSED DURING: 13 growth stages; CONTAINS InterPro DOMAIN/s: Methionine sulphoxide reductase B (InterPro:IPR0…
'29.4'	'protein.postranslational modification'	HORVU7Hr1G108270,5	-8.45533	7.14788e-21	'(loc_os06g45660.1 : 206.0) no description available & (at1g31160 : 189.0) Encodes a member of the histidine triad nucleotide-binding family of proteins, but its activity has not been determined.; HISTIDINE TRIAD NUCLEOTIDE-BINDING 2 (HINT 2); FUNCTIONS IN: protein kinase C binding, zinc ion binding, catalytic activity; INVOLVED IN: biological_process unknown; LOCATED IN: chloroplast; EXPRESSED I…
'29.4'	'protein.postranslational modification'	HORVU7Hr1G113110,14	-8.71425	1.60165e-42	'(loc_os06g44210.2 : 451.0) no description available & (at4g31860 : 382.0) Protein phosphatase 2C family protein; FUNCTIONS IN: protein serine/threonine phosphatase activity, catalytic activity; INVOLVED IN: protein amino acid dephosphorylation; LOCATED IN: plasma membrane; EXPRESSED IN: 24 plant structures; EXPRESSED DURING: 15 growth stages; CONTAINS InterPro DOMAIN/s: Protein phosphatase 2C, m…
'29.4'	'protein.postranslational modification'	HORVU5Hr1G051850,5	-9.11634	3.54102e-42	'(loc_os09g07510.2 : 907.0) no description available & (at3g25800 : 884.0) one of three genes encoding the protein phosphatase 2A regulatory subunit; protein phosphatase 2A subunit A2 (PP2AA2); FUNCTIONS IN: protein phosphatase type 2A regulator activity; INVOLVED IN: response to cadmium ion, regulation of phosphorylation; LOCATED IN: plasma membrane; EXPRESSED IN: 25 plant structures; EXPRESSED …
'29.4'	'protein.postranslational modification'	HORVU6Hr1G077100,7	-9.05257	6.41824e-85	'(loc_os03g57940.3 : 1094.0) no description available & (at3g03940 : 1016.0) Protein kinase family protein; FUNCTIONS IN: protein serine/threonine kinase activity, protein kinase activity, kinase activity, ATP binding; INVOLVED IN: protein amino acid phosphorylation; LOCATED IN: cellular_component unknown; EXPRESSED IN: cultured cell; CONTAINS InterPro DOMAIN/s: Protein kinase, ATP binding site (…
'29.4'	'protein.postranslational modification'	HORVU7Hr1G051280,7	-8.74483	5.1786e-28	'(loc_os08g40200.1 : 696.0) no description available & (at5g63870 : 511.0) Encodes a nuclear localized serine/threonine phosphatase that appears to be regulated by redox activity and is a positive regulator of cryptochrome mediated blue light signalling.; serine/threonine phosphatase 7 (PP7); CONTAINS InterPro DOMAIN/s: Metallophosphoesterase (InterPro:IPR004843), Serine/threonine-specific protei…
'29.4.1.57'	'protein.postranslational modification.kinase.receptor like cytoplasmatic kinase VII'	HORVU2Hr1G039960,8	-8.19967	2.68822e-75	'(loc_os07g37810.2 : 666.0) no description available & (at4g03390 : 316.0) STRUBBELIG-receptor family 3 (SRF3); FUNCTIONS IN: protein serine/threonine kinase activity, kinase activity, ATP binding; INVOLVED IN: transmembrane receptor protein tyrosine kinase signaling pathway, protein amino acid phosphorylation; LOCATED IN: plasma membrane; EXPRESSED IN: 23 plant structures; EXPRESSED DURING: 13 g…
'29.4.1.57'	'protein.postranslational modification.kinase.receptor like cytoplasmatic kinase VII'	HORVU5Hr1G012510,8	-9.59246	4.56858e-62	'(loc_os03g17550.1 : 293.0) no description available & (at5g18610 : 266.0) Protein kinase superfamily protein; FUNCTIONS IN: protein serine/threonine kinase activity, protein kinase activity, kinase activity, ATP binding; INVOLVED IN: protein amino acid phosphorylation; CONTAINS InterPro DOMAIN/s: Protein kinase, ATP binding site (InterPro:IPR017441), Protein kinase, catalytic domain (InterPro:IP…
'29.4.1.57'	'protein.postranslational modification.kinase.receptor like cytoplasmatic kinase VII'	HORVU5Hr1G113550,7	-8.20945	7.8884e-46	'(loc_os03g60710.1 : 183.0) no description available & (at2g28930 : 167.0) protein kinase 1B (PK1B); FUNCTIONS IN: protein serine/threonine kinase activity, protein kinase activity, kinase activity, ATP binding; INVOLVED IN: protein amino acid phosphorylation; LOCATED IN: plasma membrane; EXPRESSED IN: 22 plant structures; EXPRESSED DURING: 13 growth stages; CONTAINS InterPro DOMAIN/s: Protein ki…
'29.4.1.57'	'protein.postranslational modification.kinase.receptor like cytoplasmatic kinase VII'	HORVU6Hr1G030880,4	-8.42206	2.48322e-90	'(loc_os02g07960.4 : 963.0) no description available & (at4g03390 : 314.0) STRUBBELIG-receptor family 3 (SRF3); FUNCTIONS IN: protein serine/threonine kinase activity, kinase activity, ATP binding; INVOLVED IN: transmembrane receptor protein tyrosine kinase signaling pathway, protein amino acid phosphorylation; LOCATED IN: plasma membrane; EXPRESSED IN: 23 plant structures; EXPRESSED DURING: 13 g…
'29.5'	'protein.degradation'	HORVU2Hr1G036390,9	-8.44708	5.9296e-23	'(loc_os02g42320.2 : 457.0) no description available & (q9lsu2|psa2_orysa : 456.0) Proteasome subunit alpha type 2 (EC 3.4.25.1) (20S proteasome alpha subunit B) (20S proteasome subunit alpha-2) - Oryza sativa (Rice) & (at1g16470 : 421.0) Encodes 20S proteasome subunit PAB1 (PAB1).; proteasome subunit PAB1 (PAB1); FUNCTIONS IN: peptidase activity, endopeptidase activity, threonine-type endopeptid…
'29.5'	'protein.degradation'	HORVU1Hr1G065960,8	-9.10591	9.4884e-142	'(loc_os10g28020.3 : 785.0) no description available & (at4g14570 : 556.0) acylaminoacyl-peptidase-related; FUNCTIONS IN: serine-type peptidase activity; INVOLVED IN: proteolysis; LOCATED IN: chloroplast, vacuole; EXPRESSED IN: 23 plant structures; EXPRESSED DURING: 13 growth stages; CONTAINS InterPro DOMAIN/s: Peptidase S9, prolyl oligopeptidase, catalytic domain (InterPro:IPR001375); BEST Arabi…
'29.5.1'	'protein.degradation.subtilases'	HORVU5Hr1G071510,19	-8.78136	4.56858e-62	'(loc_os09g30250.1 : 272.0) no description available & (at5g59810 : 201.0) SBT5.4; FUNCTIONS IN: identical protein binding, serine-type endopeptidase activity; INVOLVED IN: proteolysis, negative regulation of catalytic activity; EXPRESSED IN: 12 plant structures; EXPRESSED DURING: 4 anthesis, C globular stage, petal differentiation and expansion stage; CONTAINS InterPro DOMAIN/s: Protease-associa…
'29.5.11'	'protein.degradation.ubiquitin'	HORVU1Hr1G052260,7	-8.24793	6.39976e-45	'(loc_os10g39620.3 : 383.0) no description available & (at2g17200 : 221.0) DSK2; CONTAINS InterPro DOMAIN/s: Heat shock chaperonin-binding (InterPro:IPR006636), Ubiquitin-associated/translation elongation factor EF1B, N-terminal (InterPro:IPR000449), Ubiquitin-associated/translation elongation factor EF1B, N-terminal, eukaryote (InterPro:IPR015940), Ubiquilin (InterPro:IPR015496), Ubiquitin (Inte…
'29.5.11'	'protein.degradation.ubiquitin'	HORVU2Hr1G058700,23	-9.59991	2.43846e-268	'(loc_os07g06950.1 : 1685.0) no description available & (at5g06600 : 1556.0) Encodes a ubiquitin-specific protease.; ubiquitin-specific protease 12 (UBP12); FUNCTIONS IN: ubiquitin-specific protease activity, ubiquitin thiolesterase activity; INVOLVED IN: ubiquitin-dependent protein catabolic process; LOCATED IN: cellular_component unknown; EXPRESSED IN: 25 plant structures; EXPRESSED DURING: 14 …
'29.5.11'	'protein.degradation.ubiquitin'	HORVU6Hr1G053250,6	-10.1762	3.70854e-276	'(loc_os02g38050.4 : 866.0) no description available & (at4g24690 : 332.0) ubiquitin-associated (UBA)/TS-N domain-containing protein / octicosapeptide/Phox/Bemp1 (PB1) domain-containing protein; FUNCTIONS IN: zinc ion binding; INVOLVED IN: biological_process unknown; LOCATED IN: cytoplasm; EXPRESSED IN: 24 plant structures; EXPRESSED DURING: 15 growth stages; CONTAINS InterPro DOMAIN/s: Octicosap…
'29.5.11.20'	'protein.degradation.ubiquitin.proteasom'	HORVU5Hr1G065220,3	-9.10066	5.53548e-47	'(loc_os09g25310.1 : 162.0) no description available & (at5g57950 : 113.0) 26S proteasome regulatory subunit, putative; CONTAINS InterPro DOMAIN/s: PDZ/DHR/GLGF (InterPro:IPR001478); Has 30201 Blast hits to 17322 proteins in 780 species: Archae - 12; Bacteria - 1396; Metazoa - 17338; Fungi - 3422; Plants - 5037; Viruses - 0; Other Eukaryotes - 2996 (source: NCBI BLink). & (reliability: 226.0) & (…
'29.5.11.4.2'	'protein.degradation.ubiquitin.E3.RING'	HORVU1Hr1G018310,7	-8.43045	2.93018e-92	'(loc_os05g04950.2 : 1145.0) no description available & (at4g03000 : 305.0) RING/U-box superfamily protein; FUNCTIONS IN: zinc ion binding; INVOLVED IN: biological_process unknown; LOCATED IN: cellular_component unknown; CONTAINS InterPro DOMAIN/s: Zinc finger, RING-type (InterPro:IPR001841); BEST Arabidopsis thaliana protein match is: RING/U-box superfamily protein (TAIR:AT1G03365.1); Has 35333 …
'29.5.11.4.2'	'protein.degradation.ubiquitin.E3.RING'	HORVU1Hr1G024190,6	-8.34873	2.90032e-17	'(loc_os05g07070.7 : 759.0) no description available & (at2g37150 : 160.0) RING/U-box superfamily protein; FUNCTIONS IN: zinc ion binding; LOCATED IN: endomembrane system; EXPRESSED IN: 18 plant structures; EXPRESSED DURING: 6 growth stages; CONTAINS InterPro DOMAIN/s: Zinc finger, RING-type (InterPro:IPR001841), Zinc finger, C3HC4 RING-type (InterPro:IPR018957); BEST Arabidopsis thaliana protein…
'29.5.11.4.2'	'protein.degradation.ubiquitin.E3.RING'	HORVU1Hr1G070620,3	-8.31967	1.83696e-168	'(loc_os05g39380.1 : 617.0) no description available & (at3g58030 : 125.0) RING/U-box superfamily protein; FUNCTIONS IN: zinc ion binding; CONTAINS InterPro DOMAIN/s: Zinc finger, RING-type, conserved site (InterPro:IPR017907), Zinc finger, RING-type (InterPro:IPR001841), Zinc finger, C3HC4 RING-type (InterPro:IPR018957); BEST Arabidopsis thaliana protein match is: RING/U-box superfamily protein …
'29.5.11.4.2'	'protein.degradation.ubiquitin.E3.RING'	HORVU5Hr1G066160,5	-8.24317	1.67973e-33	'(loc_os09g24650.4 : 369.0) no description available & (at3g47550 : 232.0) RING/FYVE/PHD zinc finger superfamily protein; FUNCTIONS IN: zinc ion binding; INVOLVED IN: response to salt stress; EXPRESSED IN: 23 plant structures; EXPRESSED DURING: 14 growth stages; CONTAINS InterPro DOMAIN/s: Protein of unknown function DUF3675 (InterPro:IPR022143), Zinc finger, C3HC4 RING-type (InterPro:IPR018957),…
'29.5.11.4.2'	'protein.degradation.ubiquitin.E3.RING'	HORVU5Hr1G082790,4	-8.64024	2.99492e-20	'(loc_os09g36460.1 : 218.0) no description available & (at3g19910 : 166.0) RING/U-box superfamily protein; FUNCTIONS IN: zinc ion binding; EXPRESSED IN: 24 plant structures; EXPRESSED DURING: 15 growth stages; CONTAINS InterPro DOMAIN/s: Zinc finger, RING-type (InterPro:IPR001841), Zinc finger, C3HC4 RING-type (InterPro:IPR018957); BEST Arabidopsis thaliana protein match is: RING/U-box superfamil…
'29.5.11.4.2'	'protein.degradation.ubiquitin.E3.RING'	HORVU7Hr1G063520,3	-8.37938	3.79762e-16	'(loc_os08g29590.1 : 136.0) no description available & (at1g11020 : 96.3) RING/FYVE/PHD zinc finger superfamily protein; FUNCTIONS IN: zinc ion binding; EXPRESSED IN: 24 plant structures; EXPRESSED DURING: 15 growth stages; CONTAINS InterPro DOMAIN/s: Zinc finger, C3HC4 RING-type (InterPro:IPR018957), Zinc finger, RING-CH-type (InterPro:IPR011016); BEST Arabidopsis thaliana protein match is: RING…
'29.5.11.4.2'	'protein.degradation.ubiquitin.E3.RING'	HORVU6Hr1G070750,3	-9.17243	3.11134e-91	'(loc_os06g21390.2 : 428.0) no description available & (at3g08505 : 348.0) zinc finger (CCCH-type/C3HC4-type RING finger) family protein; FUNCTIONS IN: zinc ion binding, nucleic acid binding; CONTAINS InterPro DOMAIN/s: Zinc finger, CCCH-type (InterPro:IPR000571), Zinc finger, RING-type, conserved site (InterPro:IPR017907), Zinc finger, RING-type (InterPro:IPR001841), Zinc finger, C3HC4 RING-type…
'29.5.11.4.3.2'	'protein.degradation.ubiquitin.E3.SCF.FBOX'	HORVU1Hr1G086180,5	-8.2384	1.23838e-47	'(loc_os07g35050.1 : 217.0) no description available & (at5g49610 : 92.0) F-box family protein; CONTAINS InterPro DOMAIN/s: F-box domain, cyclin-like (InterPro:IPR001810), F-box domain, Skp2-like (InterPro:IPR022364), F-box associated interaction domain (InterPro:IPR017451); BEST Arabidopsis thaliana protein match is: F-box family protein (TAIR:AT1G33530.1); Has 1807 Blast hits to 1807 proteins i…
'29.5.11.4.3.2'	'protein.degradation.ubiquitin.E3.SCF.FBOX'	HORVU2Hr1G103700,2	-9.30378	1.77358e-110	'(loc_os04g52870.1 : 803.0) no description available & (at5g21040 : 525.0) Encodes an F-box containing protein that interacts physically with BHLH32 and appears to be involved in mediating phosphate starvation responses.; F-box protein 2 (FBX2); FUNCTIONS IN: molecular_function unknown; INVOLVED IN: cellular response to phosphate starvation; LOCATED IN: SCF ubiquitin ligase complex; EXPRESSED IN:…
'29.5.11.4.3.2'	'protein.degradation.ubiquitin.E3.SCF.FBOX'	HORVU2Hr1G103700,3	-8.30378	5.56238e-66	'(loc_os04g52870.1 : 803.0) no description available & (at5g21040 : 525.0) Encodes an F-box containing protein that interacts physically with BHLH32 and appears to be involved in mediating phosphate starvation responses.; F-box protein 2 (FBX2); FUNCTIONS IN: molecular_function unknown; INVOLVED IN: cellular response to phosphate starvation; LOCATED IN: SCF ubiquitin ligase complex; EXPRESSED IN:…
'29.5.11.4.3.2'	'protein.degradation.ubiquitin.E3.SCF.FBOX'	HORVU2Hr1G103880,8	-11.1453	0	'(loc_os04g52830.1 : 166.0) no description available & (at5g60570 : 119.0) Galactose oxidase/kelch repeat superfamily protein; CONTAINS InterPro DOMAIN/s: Galactose oxidase/kelch, beta-propeller (InterPro:IPR011043), Kelch repeat type 1 (InterPro:IPR006652), Kelch related (InterPro:IPR013089), Kelch-type beta propeller (InterPro:IPR015915); BEST Arabidopsis thaliana protein match is: Galactose ox…
'29.5.11.5'	'protein.degradation.ubiquitin.ubiquitin protease'	HORVU2Hr1G022340,7	-10.8872	0	'(loc_os07g46660.1 : 522.0) no description available & (at4g30890 : 342.0) Encodes a ubiquitin-specific protease.; ubiquitin-specific protease 24 (UBP24); FUNCTIONS IN: ubiquitin-specific protease activity, ubiquitin thiolesterase activity; INVOLVED IN: ubiquitin-dependent protein catabolic process; LOCATED IN: nucleus; EXPRESSED IN: 24 plant structures; EXPRESSED DURING: 14 growth stages; CONTAI…
'29.5.11.5'	'protein.degradation.ubiquitin.ubiquitin protease'	HORVU3Hr1G049120,16	-8.37504	2.22656e-43	'(loc_os01g36930.1 : 416.0) no description available & (at3g21280 : 318.0) Encodes a ubiquitin-specific protease.; ubiquitin-specific protease 7 (UBP7); FUNCTIONS IN: ubiquitin-specific protease activity, ubiquitin thiolesterase activity; INVOLVED IN: ubiquitin-dependent protein catabolic process; LOCATED IN: cellular_component unknown; EXPRESSED IN: 23 plant structures; EXPRESSED DURING: 13 grow…
'29.5.4'	'protein.degradation.aspartate protease'	HORVU1Hr1G017570,7	-8.23362	4.27318e-31	'(p42211|asprx_orysa : 883.0) Aspartic proteinase precursor (EC 3.4.23.-) - Oryza sativa (Rice) & (loc_os05g04630.6 : 883.0) no description available & (at1g11910 : 626.0) Encodes an aspartic proteinase that forms a heterodimer and is stable over a broad pH range (ph 3-8).; aspartic proteinase A1 (APA1); FUNCTIONS IN: endopeptidase activity; INVOLVED IN: proteolysis, response to salt stress; LOCA…
'29.5.7'	'protein.degradation.metalloprotease'	HORVU1Hr1G072490,9	-9.69	7.33634e-147	'(loc_os05g38400.3 : 1120.0) no description available & (at1g07510 : 991.0) encodes an FtsH protease that is localized to the mitochondrion; FTSH protease 10 (ftsh10); FUNCTIONS IN: in 6 functions; INVOLVED IN: proteolysis, protein catabolic process; LOCATED IN: mitochondrion, chloroplast thylakoid membrane, plastid; EXPRESSED IN: 25 plant structures; EXPRESSED DURING: 15 growth stages; CONTAINS …
'29.5.7'	'protein.degradation.metalloprotease'	HORVU1Hr1G094900,8	-8.62205	4.4259e-68	'(loc_os01g39260.1 : 968.0) no description available & (at2g26140 : 909.0) encodes an FtsH protease that is localized to the mitochondrion; FTSH protease 4 (ftsh4); FUNCTIONS IN: metallopeptidase activity, ATP-dependent peptidase activity, ATPase activity; INVOLVED IN: proteolysis, protein catabolic process; LOCATED IN: mitochondrion, plastid, membrane; EXPRESSED IN: 26 plant structures; EXPRESSE…
'29.5.7'	'protein.degradation.metalloprotease'	HORVU3Hr1G076480,10	-8.65821	4.30222e-117	'(loc_os01g57073.1 : 1118.0) no description available & (at2g41790 : 729.0) Insulinase (Peptidase family M16) family protein; FUNCTIONS IN: metalloendopeptidase activity, zinc ion binding, catalytic activity, metal ion binding; INVOLVED IN: proteolysis; LOCATED IN: cellular_component unknown; EXPRESSED IN: 23 plant structures; EXPRESSED DURING: 13 growth stages; CONTAINS InterPro DOMAIN/s: Peptid…
'29.5.7'	'protein.degradation.metalloprotease'	HORVU6Hr1G078770,7	-8.74147	6.09924e-51	'(loc_os02g52420.1 : 519.0) no description available & (at4g37040 : 459.0) encodes a methionine aminopeptidase; methionine aminopeptidase 1D (MAP1D); FUNCTIONS IN: metalloexopeptidase activity, aminopeptidase activity; INVOLVED IN: proteolysis, N-terminal protein amino acid modification; LOCATED IN: chloroplast; EXPRESSED IN: 22 plant structures; EXPRESSED DURING: 13 growth stages; CONTAINS Inter…
'29.6'	'protein.folding'	HORVU7Hr1G053170,12	-9.44294	7.91516e-89	'(q43207|fkb70_wheat : 878.0) 70 kDa peptidyl-prolyl isomerase (EC 5.2.1.8) (Peptidyl-prolyl cis-trans isomerase) (PPIase) (Rotamase) - Triticum aestivum (Wheat) & (loc_os08g41390.2 : 804.0) no description available & (at3g25230 : 705.0) Encodes a a high molecular weight member of the FK506 binding protein (FKBP) family. It has three FKBP12-like domains, tetratricopeptide repeats, and a putative …
'29.6'	'protein.folding'	HORVU1Hr1G079910,11	-8.82337	3.3682e-76	'(loc_os05g46290.1 : 233.0) no description available & (at3g13860 : 197.0) heat shock protein 60-3A (HSP60-3A); FUNCTIONS IN: ATP binding; INVOLVED IN: response to cadmium ion; LOCATED IN: mitochondrion, plasma membrane; EXPRESSED IN: 24 plant structures; EXPRESSED DURING: 13 growth stages; CONTAINS InterPro DOMAIN/s: Chaperonin Cpn60/TCP-1 (InterPro:IPR002423), Chaperonin Cpn60, conserved site (…
'29.6'	'protein.folding'	HORVU2Hr1G010040,2	-9.20701	2.47482e-47	'(at2g34860 : 152.0) embryo sac development arrest 3 (EDA3); FUNCTIONS IN: unfolded protein binding, heat shock protein binding; INVOLVED IN: megagametogenesis; LOCATED IN: chloroplast; EXPRESSED IN: 22 plant structures; EXPRESSED DURING: 13 growth stages; CONTAINS InterPro DOMAIN/s: Heat shock protein DnaJ, cysteine-rich domain (InterPro:IPR001305); Has 773 Blast hits to 773 proteins in 260 spec…
'29.6'	'protein.folding'	HORVU2Hr1G012040,1	-8.77149	2.63696e-35	'(at2g34860 : 152.0) embryo sac development arrest 3 (EDA3); FUNCTIONS IN: unfolded protein binding, heat shock protein binding; INVOLVED IN: megagametogenesis; LOCATED IN: chloroplast; EXPRESSED IN: 22 plant structures; EXPRESSED DURING: 13 growth stages; CONTAINS InterPro DOMAIN/s: Heat shock protein DnaJ, cysteine-rich domain (InterPro:IPR001305); Has 773 Blast hits to 773 proteins in 260 spec…
'30.11'	'signalling.light'	HORVU4Hr1G008610,4	-8.38802	2.11892e-120	'(p06593|phya3_avesa : 1897.0) Phytochrome A type 3 (AP3) - Avena sativa (Oat) & (loc_os03g51030.3 : 1813.0) no description available & (at1g09570 : 1338.0) Light-labile cytoplasmic red/far-red light photoreceptor involved in the regulation of photomorphogenesis. It exists in two inter-convertible forms: Pr and Pfr (active) and functions as a dimer.The N terminus carries a single tetrapyrrole chr…
'30.2.14'	'signalling.receptor kinases.leucine rich repeat XIV'	HORVU5Hr1G098820,3	-8.34873	2.94388e-26	'(loc_os03g56250.1 : 592.0) no description available & (at2g16250 : 301.0) Leucine-rich repeat protein kinase family protein; FUNCTIONS IN: protein serine/threonine kinase activity, protein kinase activity, ATP binding; INVOLVED IN: transmembrane receptor protein tyrosine kinase signaling pathway, protein amino acid phosphorylation; LOCATED IN: plasma membrane, plant-type cell wall; EXPRESSED IN:…
'30.2.3'	'signalling.receptor kinases.leucine rich repeat III'	HORVU1Hr1G069510,6	-8.58871	6.41824e-85	'(loc_os05g40200.1 : 873.0) no description available & (at5g58300 : 655.0) Leucine-rich repeat protein kinase family protein; FUNCTIONS IN: protein serine/threonine kinase activity, kinase activity, ATP binding; INVOLVED IN: transmembrane receptor protein tyrosine kinase signaling pathway, protein amino acid phosphorylation; LOCATED IN: plasma membrane; EXPRESSED IN: 22 plant structures; EXPRESSE…
'30.2.3'	'signalling.receptor kinases.leucine rich repeat III'	HORVU2Hr1G017650,7	-9.20945	8.46234e-120	'(loc_os07g48310.2 : 849.0) no description available & (at5g58300 : 571.0) Leucine-rich repeat protein kinase family protein; FUNCTIONS IN: protein serine/threonine kinase activity, kinase activity, ATP binding; INVOLVED IN: transmembrane receptor protein tyrosine kinase signaling pathway, protein amino acid phosphorylation; LOCATED IN: plasma membrane; EXPRESSED IN: 22 plant structures; EXPRESSE…
'30.3'	'signalling.calcium'	HORVU2Hr1G101040,22	-8.25267	1.83076e-104	'(loc_os04g51610.1 : 1548.0) no description available & (at5g57110 : 1289.0) Arabidopsis-autoinhibited Ca2+ -ATPase, isoform 8, contains all of the characteristic motifs of Ca2+ -transporting P-type Ca2+ -ATPases and is localized to the plasma membrane.; "autoinhibited Ca2+ -ATPase, isoform 8" (ACA8); FUNCTIONS IN: protein self-association, calcium-transporting ATPase activity, calmodulin binding…
'30.3'	'signalling.calcium'	HORVU2Hr1G109850,5	-9.35094	1.04714e-166	'(loc_os04g56740.2 : 426.0) no description available & (at1g19870 : 119.0) IQ-domain 32 (iqd32); FUNCTIONS IN: calmodulin binding; INVOLVED IN: biological_process unknown; LOCATED IN: cytosol, nucleus, plasma membrane, chloroplast envelope; EXPRESSED IN: 24 plant structures; EXPRESSED DURING: 13 growth stages; CONTAINS InterPro DOMAIN/s: IQ calmodulin-binding region (InterPro:IPR000048); BEST Ara…
'30.3'	'signalling.calcium'	HORVU3Hr1G067750,1	-8.24793	1.03655e-37	'(loc_os01g51840.2 : 575.0) no description available & (at1g74690 : 199.0) IQ-domain 31 (IQD31); FUNCTIONS IN: calmodulin binding; INVOLVED IN: biological_process unknown; LOCATED IN: cytosol, plasma membrane; EXPRESSED IN: 23 plant structures; EXPRESSED DURING: 13 growth stages; CONTAINS InterPro DOMAIN/s: IQ calmodulin-binding region (InterPro:IPR000048); BEST Arabidopsis thaliana protein match…
'30.3'	'signalling.calcium'	HORVU2Hr1G087010,3	-9.17243	1.70659e-30	'(loc_os04g42430.2 : 134.0) no description available & (at4g32060 : 99.8) calcium-binding EF hand family protein; FUNCTIONS IN: calcium ion binding; EXPRESSED IN: 24 plant structures; EXPRESSED DURING: 15 growth stages; CONTAINS InterPro DOMAIN/s: EF-Hand 1, calcium-binding site (InterPro:IPR018247), EF-HAND 2 (InterPro:IPR018249), EF-hand-like domain (InterPro:IPR011992), Calcium-binding EF-hand…
'30.4'	'signalling.phosphinositides'	HORVU1Hr1G073480,5	-8.40088	1.05313e-34	'(loc_os01g63800.1 : 233.0) no description available & (at5g05710 : 205.0) Pleckstrin homology (PH) domain superfamily protein; CONTAINS InterPro DOMAIN/s: Pleckstrin homology-type (InterPro:IPR011993), Pleckstrin homology (InterPro:IPR001849); BEST Arabidopsis thaliana protein match is: pleckstrin homologue 1 (TAIR:AT2G29700.1); Has 1807 Blast hits to 1807 proteins in 277 species: Archae - 0; Ba…
'30.5'	'signalling.G-proteins'	HORVU2Hr1G028600,8	-9.93664	6.31722e-88	'(loc_os07g43470.1 : 357.0) no description available & (at4g39520 : 333.0) Encodes a member of the DRG (developmentally regulated G-protein) family. Has GTPase activity.; GTP-binding protein-related; FUNCTIONS IN: GDP binding, GTP binding, GTPase activity; LOCATED IN: intracellular; EXPRESSED IN: 24 plant structures; EXPRESSED DURING: 15 growth stages; CONTAINS InterPro DOMAIN/s: Small GTP-bindin…
'30.5'	'signalling.G-proteins'	HORVU2Hr1G040020,25	-8.36194	6.23888e-134	'(loc_os07g37750.1 : 2555.0) no description available & (at3g43300 : 2048.0) AtMIN7 is an immunity associated Arabidopsis protein targeted by HopM1, a conserved Pseudomonas syringae virulence protein. AtMIN7 encodes one of the eight members of the Arabidopsis adenosine diphosphate (ADP) ribosylation factor (ARF) guanine nucleotide exchange factor (GEF) protein family. The AFR GEF proteins are key…
'30.5'	'signalling.G-proteins'	HORVU2Hr1G077230,19	-8.32193	8.40522e-34	'(p16976|yptm1_maize : 350.0) GTP-binding protein YPTM1 - Zea mays (Maize) & (loc_os05g01490.1 : 305.0) no description available & (at4g17530 : 287.0) RAB GTPase homolog 1C (RAB1C); FUNCTIONS IN: GTP binding; INVOLVED IN: protein transport, small GTPase mediated signal transduction; LOCATED IN: plasma membrane, vacuole, membrane; EXPRESSED IN: 25 plant structures; EXPRESSED DURING: 16 growth stag…
'30.5'	'signalling.G-proteins'	HORVU3Hr1G071740,3	-9.25503	2.43586e-50	'(loc_os01g54590.1 : 169.0) no description available & (p40393|ric2_orysa : 164.0) Ras-related protein RIC2 - Oryza sativa (Rice) & (at1g16920 : 160.0) small GTP-binding protein (Rab11)similar to YPT3/RAB11 proteins in yeast and mammals, respectively. YPT3/RAB11 is involved in intracellular protein trafficking.; RAB GTPase homolog A1B (RABA1b); FUNCTIONS IN: GTP binding; INVOLVED IN: intracellula…
'30.5'	'signalling.G-proteins'	HORVU1Hr1G087340,5	-8.88874	2.1528e-117	'(loc_os02g20410.1 : 233.0) no description available & (at5g46070 : 226.0) Guanylate-binding family protein; FUNCTIONS IN: GTP binding, GTPase activity; INVOLVED IN: immune response; LOCATED IN: nucleolus, chloroplast; EXPRESSED IN: 24 plant structures; EXPRESSED DURING: 14 growth stages; CONTAINS InterPro DOMAIN/s: Guanylate-binding protein, N-terminal (InterPro:IPR015894), Guanylate-binding pro…
'30.99'	'signalling.unspecified'	HORVU1Hr1G072990,10	-8.84235	3.76382e-55	'(loc_os05g37950.1 : 237.0) no description available & (at5g05930 : 145.0) guanylyl cyclase 1 (GC1); CONTAINS InterPro DOMAIN/s: Guanylyl cyclase (InterPro:IPR018616); Has 35333 Blast hits to 34131 proteins in 2444 species: Archae - 798; Bacteria - 22429; Metazoa - 974; Fungi - 991; Plants - 531; Viruses - 0; Other Eukaryotes - 9610 (source: NCBI BLink). & (reliability: 290.0) & (original descrip…
'31.1'	'cell.organisation'	HORVU1Hr1G019320,4	-8.56986	1.24085e-52	'(loc_os07g26490.1 : 744.0) no description available & (at3g23280 : 429.0) XB3 ortholog 5 in Arabidopsis thaliana (XBAT35); FUNCTIONS IN: zinc ion binding; EXPRESSED IN: 23 plant structures; EXPRESSED DURING: 15 growth stages; CONTAINS InterPro DOMAIN/s: Zinc finger, RING-type (InterPro:IPR001841), Ankyrin repeat-containing domain (InterPro:IPR020683), Ankyrin repeat (InterPro:IPR002110); BEST Ar…
'31.1'	'cell.organisation'	HORVU1Hr1G092730,7	-9.49785	2.68822e-75	'(q6i588|abil4_orysa : 411.0) Probable protein ABIL4 (Abl interactor-like protein 4) - Oryza sativa (Rice) & (loc_os05g50800.2 : 411.0) no description available & (at2g46225 : 248.0) Encodes a subunit of the WAVE complex. The WAVE complex is required for activation of ARP2/3 complex which functions in actin microfilament nucleation and branching. One of four ABI-like proteins.; ABI-1-like 1 (ABIL…
'31.1'	'cell.organisation'	HORVU4Hr1G007340,7	-8.32643	3.52044e-24	'(loc_os03g50220.1 : 363.0) no description available & (at1g13330 : 293.0) Encodes the Arabidopsis Hop2 homologue. In other species, Hop2 is proposed to be involved in inter-homolog bias in double strand break repair.; Arabidopsis Hop2 homolog (AHP2); CONTAINS InterPro DOMAIN/s: Tat binding protein 1-interacting (InterPro:IPR010776); Has 3022 Blast hits to 2708 proteins in 418 species: Archae - 8…
'31.1'	'cell.organisation'	HORVU4Hr1G019610,10	-8.45943	1.17887e-104	'(loc_os11g06910.2 : 1132.0) no description available & (at1g77580 : 323.0) Plant protein of unknown function (DUF869); CONTAINS InterPro DOMAIN/s: Protein of unknown function DUF869, plant (InterPro:IPR008587); BEST Arabidopsis thaliana protein match is: Plant protein of unknown function (DUF869) (TAIR:AT1G21810.1); Has 35333 Blast hits to 34131 proteins in 2444 species: Archae - 798; Bacteria -…
'31.1'	'cell.organisation'	HORVU5Hr1G095250,20	-8.42626	3.7766e-98	'(loc_os03g53920.1 : 969.0) no description available & (at3g44050 : 354.0) P-loop containing nucleoside triphosphate hydrolases superfamily protein; FUNCTIONS IN: microtubule motor activity, ATP binding; INVOLVED IN: microtubule-based movement; LOCATED IN: chloroplast; EXPRESSED IN: 20 plant structures; EXPRESSED DURING: 8 growth stages; CONTAINS InterPro DOMAIN/s: Kinesin, motor region, conserve…
'31.1'	'cell.organisation'	HORVU6Hr1G032610,2	-8.26209	7.63118e-43	'(loc_os08g04280.2 : 682.0) no description available & (at1g18450 : 516.0) Encodes a gene similar to actin-related proteins in other organisms. Member of nuclear ARP family of genes. Component of chromatin remodeling complexes, involved in chromatin-mediated gene regulation. Phenotype of the arp4-1 mutant allele revealed partial sterility due to defects in anther development. Targeting the distin…
'31.1'	'cell.organisation'	HORVU7Hr1G059220,43	-10.3641	0	'(o23826|k125_tobac : 416.0) 125 kDa kinesin-related protein - Nicotiana tabacum (Common tobacco) & (at2g36200 : 412.0) P-loop containing nucleoside triphosphate hydrolases superfamily protein; FUNCTIONS IN: microtubule motor activity, ATP binding; INVOLVED IN: microtubule-based movement; EXPRESSED IN: 12 plant structures; EXPRESSED DURING: 6 growth stages; CONTAINS InterPro DOMAIN/s: Kinesin, mo…
'31.1.1.1.2'	'cell.organisation.cytoskeleton.actin.actin depolymerizing factors'	HORVU5Hr1G100770,2	-9.90388	1.81952e-33	'(loc_os03g56790.1 : 277.0) no description available & (q8sag3|adf_vitvi : 218.0) Actin-depolymerizing factor (ADF) - Vitis vinifera (Grape) & (at2g31200 : 212.0) Encodes actin depolymerizing factor 6 (ADF6).; actin depolymerizing factor 6 (ADF6); FUNCTIONS IN: actin binding; INVOLVED IN: biological_process unknown; LOCATED IN: intracellular; EXPRESSED IN: 24 plant structures; EXPRESSED DURING: 1…
'31.1.1.2'	'cell.organisation.cytoskeleton.mikrotubuli'	HORVU1Hr1G047690,12	-8.66534	6.11992e-94	'(loc_os10g36490.1 : 1132.0) no description available & (at3g60740 : 891.0) Encodes tubulin-folding cofactor D. Mutants arrest during embryogenesis with embryos that are small, mushroom-shaped ('pilz') and consist of only one or few large cells each containing one or more variably enlarged nuclei and often cell wall stubs. Gene product necessary for continuous microtubule organization.; TITAN 1 (…
'31.1.1.3'	'cell.organisation.cytoskeleton.Myosin'	HORVU3Hr1G032920,2	-8.27146	2.6459e-78	'(loc_os09g04810.1 : 678.0) no description available & (at2g34730 : 182.0) myosin heavy chain-related; LOCATED IN: mitochondrion. & (reliability: 364.0) & (original description: no original description)'
'31.2'	'cell.division'	HORVU4Hr1G064670,6	-8.30834	2.86434e-63	'(loc_os03g13370.1 : 965.0) no description available & (at1g78770 : 765.0) anaphase promoting complex 6 (APC6); FUNCTIONS IN: binding; INVOLVED IN: regulation of DNA endoreduplication, phloem or xylem histogenesis, cell cycle; LOCATED IN: cellular_component unknown; EXPRESSED IN: 19 plant structures; EXPRESSED DURING: 12 growth stages; CONTAINS InterPro DOMAIN/s: Tetratricopeptide TPR-3 (InterPro…
'31.2'	'cell.division'	HORVU2Hr1G057860,13	-8.75154	9.45632e-99	'(loc_os07g07080.1 : 1542.0) no description available & (at3g03790 : 843.0) ankyrin repeat family protein / regulator of chromosome condensation (RCC1) family protein; FUNCTIONS IN: binding; INVOLVED IN: biological_process unknown; EXPRESSED IN: 22 plant structures; EXPRESSED DURING: 11 growth stages; CONTAINS InterPro DOMAIN/s: Regulator of chromosome condensation/beta-lactamase-inhibitor protei…
'31.3'	'cell.cycle'	HORVU4Hr1G085830,7	-8.37069	2.6709e-20	'(p23111|cdc2_maize : 421.0) Cell division control protein 2 homolog (EC 2.7.11.22) (EC 2.7.11.23) (p34cdc2) - Zea mays (Maize) & (loc_os03g02680.1 : 419.0) no description available & (at3g48750 : 396.0) A-type cyclin-dependent kinase. Together with its specific inhibitor, the Kip-related protein, KRP2 they regulate the mitosis-to-endocycle transition during leaf development. Dominant negative mu…
'31.3.1'	'cell.cycle.peptidylprolyl isomerase'	HORVU2Hr1G039880,2	-8.30378	1.02024e-40	'(loc_os07g37830.2 : 541.0) no description available & (at3g15520 : 444.0) Cyclophilin-like peptidyl-prolyl cis-trans isomerase family protein; FUNCTIONS IN: peptidyl-prolyl cis-trans isomerase activity; INVOLVED IN: protein folding; LOCATED IN: thylakoid, thylakoid lumen, chloroplast thylakoid membrane, chloroplast thylakoid lumen, chloroplast; EXPRESSED IN: 22 plant structures; EXPRESSED DURING…
'31.3.1'	'cell.cycle.peptidylprolyl isomerase'	HORVU4Hr1G070330,10	-8.32193	1.47951e-57	'(loc_os03g10400.3 : 549.0) no description available & (at5g67530 : 440.0) plant U-box 49 (PUB49); FUNCTIONS IN: ubiquitin-protein ligase activity, peptidyl-prolyl cis-trans isomerase activity; INVOLVED IN: protein folding, protein ubiquitination; LOCATED IN: ubiquitin ligase complex; EXPRESSED IN: 24 plant structures; EXPRESSED DURING: 13 growth stages; CONTAINS InterPro DOMAIN/s: Cyclophilin-li…
'31.4'	'cell.vesicle transport'	HORVU1Hr1G062650,7	-9.86419	1.39797e-155	'(loc_os05g24594.1 : 889.0) no description available & (p49661|copd_orysa : 785.0) Coatomer subunit delta (Delta-coat protein) (Delta-COP) (Archain) - Oryza sativa (Rice) & (at5g05010 : 636.0) clathrin adaptor complexes medium subunit family protein; INVOLVED IN: intracellular protein transport, transport, vesicle-mediated transport; LOCATED IN: membrane; EXPRESSED IN: 24 plant structures; EXPRES…
'31.4'	'cell.vesicle transport'	HORVU1Hr1G086390,5	-8.57743	1.41552e-109	'(loc_os05g48620.1 : 746.0) no description available & (at1g79830 : 374.0) This gene is predicted to encode a protein that functions as a Golgi apparatus structural component known as a golgin in mammals and yeast. A fluorescently-tagged version of GC5 co-localizes with Golgi markers, and this localization appears to be replicated using the C-terminal (139 aa) portion of the protein. The C-termin…
'31.4'	'cell.vesicle transport'	HORVU4Hr1G045980,4	-8.24317	9.63354e-95	'(loc_os03g23950.1 : 660.0) no description available & (at4g23460 : 546.0) Adaptin family protein; FUNCTIONS IN: protein transporter activity, clathrin binding, binding; INVOLVED IN: intracellular protein transport, vesicle-mediated transport, protein transport; LOCATED IN: plasma membrane; EXPRESSED IN: 24 plant structures; EXPRESSED DURING: 13 growth stages; CONTAINS InterPro DOMAIN/s: Clathrin…
'31.4'	'cell.vesicle transport'	HORVU1Hr1G047180,14	-9.05257	8.27292e-37	'(loc_os10g36870.1 : 464.0) no description available & (at4g34660 : 383.0) SH3 domain-containing protein; FUNCTIONS IN: clathrin binding; INVOLVED IN: biological_process unknown; EXPRESSED IN: 23 plant structures; EXPRESSED DURING: 14 growth stages; CONTAINS InterPro DOMAIN/s: Src homology-3 domain (InterPro:IPR001452); BEST Arabidopsis thaliana protein match is: SH3 domain-containing protein (TA…
'33.1'	'development.storage proteins'	HORVU0Hr1G008650,5	-8.9542	2.7655e-26	'(loc_os03g14950.1 : 152.0) no description available & (at3g54950 : 98.6) patatin-like protein 6 (PLA IIIA); CONTAINS InterPro DOMAIN/s: Acyl transferase/acyl hydrolase/lysophospholipase (InterPro:IPR016035), Patatin (InterPro:IPR002641); BEST Arabidopsis thaliana protein match is: PATATIN-like protein 6 (TAIR:AT2G39220.1); Has 1058 Blast hits to 1055 proteins in 202 species: Archae - 0; Bacteria…
'33.99'	'development.unspecified'	HORVU1Hr1G074650,16	-8.57365	9.57506e-53	'(loc_os05g35730.1 : 603.0) no description available & (at1g34340 : 390.0) alpha/beta-Hydrolases superfamily protein; CONTAINS InterPro DOMAIN/s: Alpha/beta hydrolase fold-1 (InterPro:IPR000073); BEST Arabidopsis thaliana protein match is: alpha/beta-Hydrolases superfamily protein (TAIR:AT5G49950.1); Has 2391 Blast hits to 2388 proteins in 904 species: Archae - 0; Bacteria - 1410; Metazoa - 329; …
'33.99'	'development.unspecified'	HORVU2Hr1G090260,6	-9.55075	8.5686e-74	'(loc_os04g44290.1 : 407.0) no description available & (at2g37860 : 352.0) Encodes a protein of unknown function. Mutants have pale leaves, lower cell density in the palisade parenchyma and increased sensitivity to ozone and virulent Pseudomonas syringae; LOWER CELL DENSITY 1 (LCD1); FUNCTIONS IN: molecular_function unknown; INVOLVED IN: leaf development; LOCATED IN: chloroplast, membrane; EXPRES…
'33.99'	'development.unspecified'	HORVU4Hr1G026330,10	-8.61471	1.5272e-51	'(loc_os12g03822.1 : 752.0) no description available & (at2g19540 : 595.0) Transducin family protein / WD-40 repeat family protein; CONTAINS InterPro DOMAIN/s: Histone-binding protein RBBP4 (InterPro:IPR022052), WD40 repeat 2 (InterPro:IPR019782), WD40 repeat-like-containing domain (InterPro:IPR011046), WD40-repeat-containing domain (InterPro:IPR017986), WD40/YVTN repeat-like-containing domain (I…
'33.99'	'development.unspecified'	HORVU6Hr1G053730,26	-8.3443	9.24464e-16	'(loc_os02g38250.1 : 739.0) no description available & (at1g13120 : 172.0) embryo defective 1745 (emb1745); FUNCTIONS IN: molecular_function unknown; INVOLVED IN: embryo development ending in seed dormancy; LOCATED IN: nuclear pore; EXPRESSED IN: 24 plant structures; EXPRESSED DURING: 14 growth stages; CONTAINS InterPro DOMAIN/s: GLE1-like (InterPro:IPR012476); BEST Arabidopsis thaliana protein m…
'33.99'	'development.unspecified'	HORVU6Hr1G071690,5	-8.94544	5.20444e-81	'(loc_os02g48964.1 : 353.0) no description available & (at3g13340 : 276.0) Transducin/WD40 repeat-like superfamily protein; FUNCTIONS IN: molecular_function unknown; INVOLVED IN: biological_process unknown; LOCATED IN: CUL4 RING ubiquitin ligase complex, heterotrimeric G-protein complex; EXPRESSED IN: 24 plant structures; EXPRESSED DURING: 14 growth stages; CONTAINS InterPro DOMAIN/s: WD40 repeat…
'34.1.1.1'	'transport.p- and v-ATPases.H+-transporting two-sector ATPase.subunit B'	HORVU3Hr1G067040,1	-8.93958	5.0419e-87	'(q40079|vatb2_horvu : 340.0) Vacuolar ATP synthase subunit B isoform 2 (EC 3.6.3.14) (V-ATPase B subunit 2) (Vacuolar proton pump B subunit 2) - Hordeum vulgare (Barley) & (loc_os01g51380.2 : 337.0) no description available & (at4g38510 : 336.0) ATPase, V1 complex, subunit B protein; FUNCTIONS IN: hydrogen ion transporting ATP synthase activity, rotational mechanism, hydrolase activity, acting o…
'34.1.1.6'	'transport.p- and v-ATPases.H+-transporting two-sector ATPase.subunit H'	HORVU2Hr1G042700,4	-8.79442	5.25606e-55	'(q84zc0|vath_orysa : 825.0) Probable vacuolar ATP synthase subunit H (EC 3.6.3.14) (V-ATPase H subunit) (Vacuolar proton pump subunit H) - Oryza sativa (Rice) & (loc_os07g36470.1 : 825.0) no description available & (at3g42050 : 659.0) vacuolar ATP synthase subunit H family protein; FUNCTIONS IN: binding, hydrolase activity, acting on acid anhydrides, catalyzing transmembrane movement of substanc…
'34.12'	'transport.metal'	HORVU2Hr1G102840,13	-9.86728	1.74566e-113	'(q5tkg3|cax1b_orysa : 295.0) Vacuolar cation/proton exchanger 1b (Ca(2+)/H(+) exchanger 1b) (OsCAX1b) - Oryza sativa (Rice) & (loc_os05g51610.1 : 295.0) no description available & (at2g38170 : 220.0) Encodes a high affinity vacuolar calcium antiporter. The residue His 338 is critical to Ca2+ transport activity. Disruption of CAX1 reduces manganese and zinc of shoot tissue and results in a decrea…
'34.12'	'transport.metal'	HORVU0Hr1G000410,2	-8.23362	8.6762e-28	'(loc_os05g25194.2 : 765.0) no description available & (at3g08650 : 556.0) ZIP metal ion transporter family; FUNCTIONS IN: metal ion transmembrane transporter activity; INVOLVED IN: metal ion transport, transmembrane transport; LOCATED IN: endomembrane system, membrane; EXPRESSED IN: 24 plant structures; EXPRESSED DURING: 15 growth stages; CONTAINS InterPro DOMAIN/s: Zinc/iron permease (InterPro:…
'34.12'	'transport.metal'	HORVU7Hr1G106570,1	-8.87344	8.04174e-86	'(loc_os06g46310.2 : 664.0) no description available & (at1g80830 : 549.0) Thought to be involved in iron homeostasis. Induced in leaves in response to iron deficiency. Transgenic plants accumulate toxic levels of iron. Gene complements yeast iron uptake mutants.; natural resistance-associated macrophage protein 1 (NRAMP1); CONTAINS InterPro DOMAIN/s: Natural resistance-associated macrophage prot…
'34.13'	'transport.peptides and oligopeptides'	HORVU3Hr1G092870,5	-8.31288	3.18482e-18	'(loc_os01g68510.1 : 543.0) no description available & (at1g69870 : 290.0) Encodes a low affinity nitrate transporter NRT1.7. Expressed in phloem. Responsible for source-to-sink remobilization of nitrate.; nitrate transporter 1.7 (NRT1.7); FUNCTIONS IN: low affinity nitrate transmembrane transporter activity, transporter activity; INVOLVED IN: oligopeptide transport, response to salt stress, nitr…
'34.14'	'transport.unspecified cations'	HORVU1Hr1G061420,27	-8.21432	1.88978e-98	'(loc_os05g33390.1 : 1965.0) no description available & (at5g23630 : 1647.0) A member of the eukaryotic type V subfamily (P5) of P-type ATPase cation pumps; MIA is most similar to the human P5 ATPase ATY2(44% identity) and to Spf1p from S. cerevisiae (41% identity). Highly abundant in the endoplasmic reticulum and small vesicles of developing pollen grains and tapetum cells. T-DNA insertional mut…
'34.14'	'transport.unspecified cations'	HORVU7Hr1G113400,4	-8.24317	4.20592e-34	'(loc_os06g44150.1 : 525.0) no description available & (at1g16010 : 415.0) Transmembrane magnesium transporter. One of nine family members.; magnesium transporter 2 (MGT2); FUNCTIONS IN: magnesium ion transmembrane transporter activity, metal ion transmembrane transporter activity; INVOLVED IN: transmembrane transport, metal ion transport; LOCATED IN: membrane; EXPRESSED IN: 32 plant structures; …
'34.15'	'transport.potassium'	HORVU2Hr1G071570,8	-8.79442	3.96068e-89	'(loc_os04g32920.5 : 938.0) no description available & (q6vva6|hak1_orysa : 930.0) Potassium transporter 1 (OsHAK1) - Oryza sativa (Rice) & (at4g13420 : 656.0) Encodes a protein of the KUP/HAK/KT potassium channel class that is upregulated in the roots by K levels.; high affinity K+ transporter 5 (HAK5); FUNCTIONS IN: potassium ion transmembrane transporter activity, potassium:sodium symporter ac…
'34.16'	'transport.ABC transporters and multidrug resistance systems'	HORVU1Hr1G003300,19	-8.45533	4.16784e-123	'(loc_os01g73530.1 : 1961.0) no description available & (at4g39850 : 1736.0) Encodes a peroxisomal protein of the ATP binding cassette (ABC) transporter class (PMP subfamily) with significant identity to the human X-linked adrenoleukodystrophy protein (ALDP). The gene product promotes germination and represses embryo dormancy. ABI3, ABA1, FUS3 and LEC1 are epistatic to this gene. Mutants accumula…
'34.16'	'transport.ABC transporters and multidrug resistance systems'	HORVU5Hr1G095990,9	-8.78136	4.02402e-86	'(loc_os03g54790.1 : 602.0) no description available & (at5g39040 : 501.0) Encodes a member of TAP subfamily of ABC transporters that is located in the vacuole. Mutants are hypersensitive to aluminum and the gene product may be important for intracellular movement of some substrate, possibly chelated Al, as part of a mechanism of aluminum sequestration.; transporter associated with antigen proces…
'34.2'	'transport.sugars'	HORVU1Hr1G089530,7	-7.37504	5.70484e-20	'(loc_os05g49270.1 : 784.0) no description available & (at1g19450 : 649.0) Major facilitator superfamily protein; FUNCTIONS IN: carbohydrate transmembrane transporter activity, sugar:hydrogen symporter activity; INVOLVED IN: transport, transmembrane transport; LOCATED IN: plasma membrane, vacuole, membrane; EXPRESSED IN: 25 plant structures; EXPRESSED DURING: 15 growth stages; CONTAINS InterPro D…
'34.2'	'transport.sugars'	HORVU2Hr1G079620,3	-7.01123	1.60861e-18	'(loc_os04g37980.1 : 754.0) no description available & (at1g34580 : 531.0) Major facilitator superfamily protein; FUNCTIONS IN: carbohydrate transmembrane transporter activity, sugar:hydrogen symporter activity; INVOLVED IN: transport, transmembrane transport; LOCATED IN: integral to membrane, membrane; EXPRESSED IN: 12 plant structures; EXPRESSED DURING: 7 growth stages; CONTAINS InterPro DOMAIN…
'34.2'	'transport.sugars'	HORVU2Hr1G079700,1	-6.87036	2.47162e-17	'(loc_os04g38026.1 : 563.0) no description available & (at1g34580 : 340.0) Major facilitator superfamily protein; FUNCTIONS IN: carbohydrate transmembrane transporter activity, sugar:hydrogen symporter activity; INVOLVED IN: transport, transmembrane transport; LOCATED IN: integral to membrane, membrane; EXPRESSED IN: 12 plant structures; EXPRESSED DURING: 7 growth stages; CONTAINS InterPro DOMAIN…
'34.2'	'transport.sugars'	HORVU2Hr1G090610,13	-8.29462	1.9752e-46	'(loc_os04g44430.1 : 625.0) no description available & (at5g64500 : 506.0) Major facilitator superfamily protein; FUNCTIONS IN: molecular_function unknown; INVOLVED IN: transmembrane transport; LOCATED IN: membrane; EXPRESSED IN: 24 plant structures; EXPRESSED DURING: 15 growth stages; CONTAINS InterPro DOMAIN/s: Major facilitator superfamily (InterPro:IPR020846), Major facilitator superfamily MF…
'34.22'	'transport.cyclic nucleotide or calcium regulated channels'	HORVU2Hr1G114940,7	-9.63844	3.6835e-190	'(loc_os04g55080.1 : 622.0) no description available & (at5g57940 : 414.0) member of Cyclic nucleotide gated channel family; cyclic nucleotide gated channel 5 (CNGC5); FUNCTIONS IN: cyclic nucleotide binding, calmodulin binding, potassium channel activity; INVOLVED IN: ion transport, transmembrane transport; LOCATED IN: membrane; EXPRESSED IN: 22 plant structures; EXPRESSED DURING: 13 growth stag…
'34.22'	'transport.cyclic nucleotide or calcium regulated channels'	HORVU7Hr1G079410,1	-8.3966	8.78e-22	'(loc_os06g33570.1 : 410.0) no description available & (at5g53130 : 326.0) member of Cyclic nucleotide gated channel family; cyclic nucleotide gated channel 1 (CNGC1); FUNCTIONS IN: inward rectifier potassium channel activity, cyclic nucleotide binding, intracellular cyclic nucleotide activated cation channel activity, calmodulin binding, cation channel activity; INVOLVED IN: potassium ion transp…
'34.7'	'transport.phosphate'	HORVU1Hr1G077520,10	-8.5157	2.39752e-53	'(loc_os12g07970.3 : 768.0) no description available & (at5g44370 : 570.0) Encodes an inorganic phosphate transporter (PHT4;6).; phosphate transporter 4;6 (PHT4;6); CONTAINS InterPro DOMAIN/s: Major facilitator superfamily (InterPro:IPR020846), Major facilitator superfamily MFS-1 (InterPro:IPR011701), Major facilitator superfamily, general substrate transporter (InterPro:IPR016196); BEST Arabidop…
'34.9'	'transport.metabolite transporters at the mitochondrial membrane'	HORVU2Hr1G090800,6	-10.1189	2.89418e-120	'(loc_os04g44540.2 : 500.0) no description available & (at4g15010 : 324.0) Mitochondrial substrate carrier family protein; FUNCTIONS IN: binding; INVOLVED IN: transport, mitochondrial transport, transmembrane transport; LOCATED IN: endomembrane system, mitochondrial inner membrane, membrane; EXPRESSED IN: 19 plant structures; EXPRESSED DURING: 8 growth stages; CONTAINS InterPro DOMAIN/s: Mitochon…
'34.9'	'transport.metabolite transporters at the mitochondrial membrane'	HORVU2Hr1G090800,4	-8.54303	1.77319e-42	'(loc_os04g44540.2 : 500.0) no description available & (at4g15010 : 324.0) Mitochondrial substrate carrier family protein; FUNCTIONS IN: binding; INVOLVED IN: transport, mitochondrial transport, transmembrane transport; LOCATED IN: endomembrane system, mitochondrial inner membrane, membrane; EXPRESSED IN: 19 plant structures; EXPRESSED DURING: 8 growth stages; CONTAINS InterPro DOMAIN/s: Mitochon…
'34.99'	'transport.misc'	HORVU5Hr1G018400,24	-8.8392	3.30398e-36	'(loc_os12g39420.9 : 867.0) no description available & (at2g26510 : 616.0) permease; pigment defective embryo 135 (PDE135); FUNCTIONS IN: transmembrane transporter activity; INVOLVED IN: transport, transmembrane transport; LOCATED IN: membrane; EXPRESSED IN: 22 plant structures; EXPRESSED DURING: 13 growth stages; CONTAINS InterPro DOMAIN/s: Xanthine/uracil/vitamin C permease (InterPro:IPR006043)…
'34.99'	'transport.misc'	HORVU5Hr1G018400,18	-8.19967	4.22286e-61	'(loc_os12g39420.9 : 867.0) no description available & (at2g26510 : 616.0) permease; pigment defective embryo 135 (PDE135); FUNCTIONS IN: transmembrane transporter activity; INVOLVED IN: transport, transmembrane transport; LOCATED IN: membrane; EXPRESSED IN: 22 plant structures; EXPRESSED DURING: 13 growth stages; CONTAINS InterPro DOMAIN/s: Xanthine/uracil/vitamin C permease (InterPro:IPR006043)…
'35.1'	'not assigned.no ontology'	HORVU1Hr1G073660,3	-8.20945	5.79608e-17	'(q65wt0|bd31b_orysa : 197.0) Protein BUD31 homolog 2 (Protein G10 homolog 2) - Oryza sativa (Rice) & (loc_os05g37390.2 : 197.0) no description available & (at4g21110 : 184.0) G10 family protein; INVOLVED IN: biological_process unknown; LOCATED IN: nucleus; EXPRESSED IN: 24 plant structures; EXPRESSED DURING: 15 growth stages; CONTAINS InterPro DOMAIN/s: G10 protein (InterPro:IPR001748), BUD31/G1…
'35.1'	'not assigned.no ontology'	HORVU2Hr1G017860,2	-8.56224	1.9819e-89	'(loc_os12g18530.1 : 417.0) no description available & (at3g56320 : 307.0) PAP/OAS1 substrate-binding domain superfamily; FUNCTIONS IN: nucleotidyltransferase activity; INVOLVED IN: biological_process unknown; LOCATED IN: chloroplast; CONTAINS InterPro DOMAIN/s: Nucleotidyl transferase domain (InterPro:IPR002934), PAP/25A-associated (InterPro:IPR002058); BEST Arabidopsis thaliana protein match is…
'35.1'	'not assigned.no ontology'	HORVU2Hr1G108050,6	-8.56224	3.96068e-89	'(loc_os04g53770.1 : 637.0) no description available & (at1g13160 : 348.0) ARM repeat superfamily protein; FUNCTIONS IN: binding; INVOLVED IN: biological_process unknown; LOCATED IN: cellular_component unknown; EXPRESSED IN: 20 plant structures; EXPRESSED DURING: 13 growth stages; CONTAINS InterPro DOMAIN/s: Domain of unknown function, nucleolar NUC130/133, N-terminal (InterPro:IPR012977), Armadi…
'35.1'	'not assigned.no ontology'	HORVU3Hr1G023790,18	-8.21432	4.94576e-47	'(loc_os11g29120.3 : 337.0) no description available & (at1g04910 : 269.0) O-fucosyltransferase family protein; CONTAINS InterPro DOMAIN/s: GDP-fucose protein O-fucosyltransferase (InterPro:IPR019378); BEST Arabidopsis thaliana protein match is: O-fucosyltransferase family protein (TAIR:AT1G22460.1); Has 861 Blast hits to 824 proteins in 30 species: Archae - 0; Bacteria - 0; Metazoa - 0; Fungi - …
'35.1'	'not assigned.no ontology'	HORVU3Hr1G053460,6	-9.4818	3.9473e-46	'(loc_os01g42480.1 : 295.0) no description available & (at5g27490 : 248.0) Integral membrane Yip1 family protein; FUNCTIONS IN: molecular_function unknown; INVOLVED IN: biological_process unknown; LOCATED IN: membrane; EXPRESSED IN: 23 plant structures; EXPRESSED DURING: 14 growth stages; CONTAINS InterPro DOMAIN/s: Yip1 domain (InterPro:IPR006977); BEST Arabidopsis thaliana protein match is: Int…
'35.1'	'not assigned.no ontology'	HORVU3Hr1G084260,3	-8.52748	2.18034e-65	'(loc_os05g12140.1 : 698.0) no description available & (at4g23840 : 355.0) Leucine-rich repeat (LRR) family protein; BEST Arabidopsis thaliana protein match is: Leucine-rich repeat family protein (TAIR:AT1G15740.1); Has 13188 Blast hits to 8222 proteins in 561 species: Archae - 2; Bacteria - 5781; Metazoa - 2271; Fungi - 110; Plants - 3199; Viruses - 40; Other Eukaryotes - 1785 (source: NCBI BLin…
'35.1'	'not assigned.no ontology'	HORVU3Hr1G092780,4	-8.26679	2.35182e-13	'(loc_os01g68380.1 : 386.0) no description available & (at3g23980 : 166.0) Encodes a protein that interacts with the Polycomb-group (Pc-G) histone methyltransferase CLF (CURLY LEAF). It colocalizes with CLF to the nucleus and represses a subset of Pc-G target genes. The pleiotropic developmental mutant phenotype suggests that BLI prevents premature differentiation.; BLISTER (BLI); FUNCTIONS IN: t…
'35.1'	'not assigned.no ontology'	HORVU3Hr1G116880,11	-9.25974	1.51896e-96	'(loc_os01g74460.2 : 326.0) no description available & (at2g28390 : 243.0) SAND family protein; LOCATED IN: chloroplast; EXPRESSED IN: 25 plant structures; EXPRESSED DURING: 14 growth stages; CONTAINS InterPro DOMAIN/s: Vacuolar fusion protein MON1 (InterPro:IPR004353); Has 753 Blast hits to 594 proteins in 226 species: Archae - 6; Bacteria - 38; Metazoa - 289; Fungi - 213; Plants - 47; Viruses -…
'35.1'	'not assigned.no ontology'	HORVU4Hr1G049990,20	-8.59246	6.75394e-119	'(loc_os03g21850.1 : 571.0) no description available & (at3g51620 : 310.0) PAP/OAS1 substrate-binding domain superfamily; BEST Arabidopsis thaliana protein match is: nucleotidyltransferases (TAIR:AT3G61690.1); Has 386 Blast hits to 356 proteins in 104 species: Archae - 0; Bacteria - 4; Metazoa - 102; Fungi - 40; Plants - 181; Viruses - 0; Other Eukaryotes - 59 (source: NCBI BLink). & (reliability…
'35.1'	'not assigned.no ontology'	HORVU6Hr1G090380,8	-8.32643	7.37832e-15	'(loc_os02g57100.1 : 254.0) no description available & (at2g33255 : 199.0) Haloacid dehalogenase-like hydrolase (HAD) superfamily protein; FUNCTIONS IN: hydrolase activity, catalytic activity, phosphoglycolate phosphatase activity; INVOLVED IN: metabolic process; LOCATED IN: chloroplast; EXPRESSED IN: 23 plant structures; EXPRESSED DURING: 15 growth stages; CONTAINS InterPro DOMAIN/s: Haloacid de…
'35.1'	'not assigned.no ontology'	HORVU7Hr1G011080,6	-9.59619	5.6341e-66	'(loc_os06g03760.2 : 775.0) no description available & (at5g01460 : 692.0) LMBR1-like membrane protein; CONTAINS InterPro DOMAIN/s: LMBR1-like membrane protein, conserved region (InterPro:IPR006876); BEST Arabidopsis thaliana protein match is: LMBR1-like membrane protein (TAIR:AT3G08930.1); Has 1807 Blast hits to 1807 proteins in 277 species: Archae - 0; Bacteria - 0; Metazoa - 736; Fungi - 347; …
'35.1'	'not assigned.no ontology'	HORVU7Hr1G039780,6	-9.13955	2.37044e-33	'(loc_os06g13100.1 : 318.0) no description available & (at2g04690 : 219.0) Pyridoxamine 5'-phosphate oxidase family protein; FUNCTIONS IN: FMN binding; INVOLVED IN: biological_process unknown; EXPRESSED IN: 22 plant structures; EXPRESSED DURING: 13 growth stages; CONTAINS InterPro DOMAIN/s: Cellular repressor of E1A-stimulated genes (CREG) (InterPro:IPR014631), FMN-binding split barrel (InterPro:…
'35.1'	'not assigned.no ontology'	HORVU1Hr1G050340,7	-8.83605	4.71588e-56	'(loc_os03g26030.1 : 555.0) no description available & (at5g12290 : 395.0) Encodes a mitochondrial outer membrane protein, involved in galactoglycerolipid biosynthesis. The dgd1 mutant phenotype is suppressed in the dgs1 mutant background.; DGD1 SUPPRESSOR 1 (DGS1); INVOLVED IN: galactolipid biosynthetic process, hydrogen peroxide biosynthetic process; LOCATED IN: mitochondrial outer membrane, mi…
'35.1'	'not assigned.no ontology'	HORVU1Hr1G090770,6	-9.04712	2.07848e-116	'(loc_os12g07150.1 : 612.0) no description available & (at5g64440 : 302.0) AtFAAH (fatty acid amide hydrolase) modulates endogenous NAEs (N-Acylethanolamines) levels in plants by hydrolyzing NAEs to ethanolamine and their corresponding free fatty acids. NAE depletion likely participates in the regulation of plant growth.; fatty acid amide hydrolase (FAAH); FUNCTIONS IN: N-(long-chain-acyl)ethanol…
'35.1'	'not assigned.no ontology'	HORVU5Hr1G088210,8	-8.86728	7.13242e-39	'(loc_os02g57070.1 : 228.0) no description available & (at5g38890 : 189.0) Nucleic acid-binding, OB-fold-like protein; FUNCTIONS IN: RNA binding; INVOLVED IN: biological_process unknown; LOCATED IN: cellular_component unknown; EXPRESSED IN: 22 plant structures; EXPRESSED DURING: 13 growth stages; CONTAINS InterPro DOMAIN/s: Ribosomal protein S1, RNA-binding domain (InterPro:IPR003029), Exosome co…
'35.1'	'not assigned.no ontology'	HORVU5Hr1G119100,4	-9.16742	3.10082e-48	'(loc_os04g20920.1 : 556.0) no description available & (at2g13690 : 324.0) PRLI-interacting factor, putative; BEST Arabidopsis thaliana protein match is: BTB/POZ domain-containing protein (TAIR:AT5G60050.1); Has 259 Blast hits to 259 proteins in 15 species: Archae - 0; Bacteria - 0; Metazoa - 0; Fungi - 0; Plants - 259; Viruses - 0; Other Eukaryotes - 0 (source: NCBI BLink). & (reliability: 648.0…
'35.1'	'not assigned.no ontology'	HORVU7Hr1G011890,7	-8.82655	3.59834e-102	'(loc_os06g03860.1 : 812.0) no description available & (at4g22990 : 650.0) Major Facilitator Superfamily with SPX (SYG1/Pho81/XPR1) domain-containing protein; FUNCTIONS IN: molecular_function unknown; INVOLVED IN: transmembrane transport; LOCATED IN: cellular_component unknown; CONTAINS InterPro DOMAIN/s: SPX, N-terminal (InterPro:IPR004331), Major facilitator superfamily MFS-1 (InterPro:IPR01170…
'35.1.27'	'not assigned.no ontology.tetratricopeptide repeat (TPR)'	HORVU5Hr1G058490,17	-8.66534	1.50317e-54	'(loc_os04g59394.1 : 303.0) no description available & (at4g08320 : 207.0) Tetratricopeptide repeat (TPR)-like superfamily protein; FUNCTIONS IN: binding; INVOLVED IN: biological_process unknown; LOCATED IN: cellular_component unknown; EXPRESSED IN: 23 plant structures; EXPRESSED DURING: 14 growth stages; CONTAINS InterPro DOMAIN/s: Tetratricopeptide TPR-1 (InterPro:IPR001440), Tetratricopeptide-…
'35.1.41'	'not assigned.no ontology.hydroxyproline rich proteins'	HORVU4Hr1G061270,2	-9.5411	1.23838e-47	'(loc_os03g15700.1 : 121.0) no description available & (at2g32600 : 106.0) hydroxyproline-rich glycoprotein family protein; FUNCTIONS IN: zinc ion binding, nucleic acid binding; INVOLVED IN: biological_process unknown; LOCATED IN: nucleus, intracellular, spliceosomal complex; EXPRESSED IN: 22 plant structures; EXPRESSED DURING: 13 growth stages; CONTAINS InterPro DOMAIN/s: Zinc finger, C2H2-like …
'35.1.5'	'not assigned.no ontology.pentatricopeptide (PPR) repeat-containing protein'	HORVU1Hr1G019600,4	-9.77972	4.15376e-80	'(loc_os05g05320.1 : 301.0) no description available & (at4g35850 : 196.0) Pentatricopeptide repeat (PPR) superfamily protein; CONTAINS InterPro DOMAIN/s: Pentatricopeptide repeat (InterPro:IPR002885); BEST Arabidopsis thaliana protein match is: Tetratricopeptide repeat (TPR)-like superfamily protein (TAIR:AT2G02150.1); Has 30201 Blast hits to 17322 proteins in 780 species: Archae - 12; Bacteria …
'35.2'	'not assigned.unknown'	HORVU0Hr1G020270,3	-8.26679	3.93582e-35	'(loc_os06g22330.1 : 572.0) no description available & (at2g33570 : 440.0) Domain of unknown function (DUF23); CONTAINS InterPro DOMAIN/s: Protein of unknown function DUF23 (InterPro:IPR008166); BEST Arabidopsis thaliana protein match is: Domain of unknown function (DUF23) (TAIR:AT5G44670.1); Has 195 Blast hits to 195 proteins in 24 species: Archae - 2; Bacteria - 7; Metazoa - 43; Fungi - 0; Plan…
'35.2'	'not assigned.unknown'	HORVU0Hr1G022830,2	-8.33092	3.20078e-42	'(loc_os06g51100.2 : 773.0) no description available & (at4g38360 : 610.0) Protein of unknown function (DUF300); INVOLVED IN: biological_process unknown; LOCATED IN: endomembrane system; EXPRESSED IN: 23 plant structures; EXPRESSED DURING: 14 growth stages; CONTAINS InterPro DOMAIN/s: Protein of unknown function DUF300 (InterPro:IPR005178); BEST Arabidopsis thaliana protein match is: Protein of u…
'35.2'	'not assigned.unknown'	HORVU0Hr1G039250,34	-8.633	2.08556e-123	'(loc_os06g17840.1 : 746.0) no description available & (at5g47690 : 402.0) binding; FUNCTIONS IN: binding; INVOLVED IN: biological_process unknown; LOCATED IN: mitochondrion, nucleus; EXPRESSED IN: cotyledon, guard cell, cultured cell; CONTAINS InterPro DOMAIN/s: Armadillo-type fold (InterPro:IPR016024); BEST Arabidopsis thaliana protein match is: ARM repeat superfamily protein (TAIR:AT1G77600.2)…
'35.2'	'not assigned.unknown'	HORVU1Hr1G000110,1	-8.36194	2.06028e-54	'(at1g36320 : 436.0) unknown protein; BEST Arabidopsis thaliana protein match is: unknown protein (TAIR:AT4G37920.1); Has 93 Blast hits to 90 proteins in 22 species: Archae - 0; Bacteria - 0; Metazoa - 0; Fungi - 0; Plants - 85; Viruses - 0; Other Eukaryotes - 8 (source: NCBI BLink). & (loc_os01g20110.2 : 274.0) no description available & (reliability: 872.0) & (original description: no original …
'35.2'	'not assigned.unknown'	HORVU1Hr1G014370,9	-8.29921	4.07456e-40	' no hits & (original description: no original description)'
'35.2'	'not assigned.unknown'	HORVU1Hr1G033210,9	-8.5157	2.0785e-80	' no hits & (original description: no original description)'
'35.2'	'not assigned.unknown'	HORVU1Hr1G057900,4	-8.27612	1.17683e-13	' no hits & (original description: no original description)'
'35.2'	'not assigned.unknown'	HORVU1Hr1G084800,3	-8.66534	2.07148e-37	'(loc_os05g48230.1 : 380.0) no description available & (at4g13400 : 276.0) 2-oxoglutarate (2OG) and Fe(II)-dependent oxygenase superfamily protein; BEST Arabidopsis thaliana protein match is: 2-oxoglutarate (2OG) and Fe(II)-dependent oxygenase superfamily protein (TAIR:AT3G63290.1); Has 390 Blast hits to 389 proteins in 142 species: Archae - 0; Bacteria - 106; Metazoa - 14; Fungi - 122; Plants - …
'35.2'	'not assigned.unknown'	HORVU2Hr1G029600,6	-8.47168	9.83318e-44	'(loc_os07g43070.1 : 322.0) no description available & (at1g78150 : 196.0) unknown protein; FUNCTIONS IN: molecular_function unknown; INVOLVED IN: biological_process unknown; EXPRESSED IN: 23 plant structures; EXPRESSED DURING: 13 growth stages; BEST Arabidopsis thaliana protein match is: unknown protein (TAIR:AT1G35780.1). & (reliability: 392.0) & (original description: no original description)'
'35.2'	'not assigned.unknown'	HORVU2Hr1G041180,2	-8.57743	1.85108e-27	' (original description: no original description)'
'35.2'	'not assigned.unknown'	HORVU2Hr1G069590,5	-9.76653	1.06997e-31	'(loc_os04g31700.1 : 407.0) no description available & (at2g43180 : 275.0) Phosphoenolpyruvate carboxylase family protein; FUNCTIONS IN: catalytic activity; INVOLVED IN: metabolic process; LOCATED IN: chloroplast; EXPRESSED IN: 8 plant structures; EXPRESSED DURING: LP.04 four leaves visible, 4 anthesis, petal differentiation and expansion stage; CONTAINS InterPro DOMAIN/s: Pyruvate/Phosphoenolpyr…
'35.2'	'not assigned.unknown'	HORVU2Hr1G097570,5	-8.3966	1.12453e-57	'(loc_os04g46570.1 : 579.0) no description available & (at4g16650 : 480.0) O-fucosyltransferase family protein; CONTAINS InterPro DOMAIN/s: GDP-fucose protein O-fucosyltransferase (InterPro:IPR019378); BEST Arabidopsis thaliana protein match is: O-fucosyltransferase family protein (TAIR:AT1G76270.1); Has 30201 Blast hits to 17322 proteins in 780 species: Archae - 12; Bacteria - 1396; Metazoa - 17…
'35.2'	'not assigned.unknown'	HORVU2Hr1G107580,2	-8.33985	7.7382e-91	'(loc_os04g53670.1 : 1862.0) no description available & (at3g20720 : 1215.0) unknown protein; FUNCTIONS IN: molecular_function unknown; INVOLVED IN: biological_process unknown; EXPRESSED IN: 22 plant structures; EXPRESSED DURING: 13 growth stages. & (reliability: 2430.0) & (original description: no original description)'
'35.2'	'not assigned.unknown'	HORVU2Hr1G118700,6	-9.633	1.9752e-46	'(loc_os04g58380.1 : 213.0) no description available & (at4g21720 : 159.0) unknown protein; FUNCTIONS IN: molecular_function unknown; INVOLVED IN: biological_process unknown; LOCATED IN: cellular_component unknown; EXPRESSED IN: leaf whorl, sepal, male gametophyte, root, flower; EXPRESSED DURING: M germinated pollen stage, 4 anthesis, petal differentiation and expansion stage. & (reliability: 318…
'35.2'	'not assigned.unknown'	HORVU3Hr1G064390,8	-8.47168	4.64164e-59	'(loc_os01g49760.1 : 751.0) no description available & (at1g15060 : 514.0) Uncharacterised conserved protein UCP031088, alpha/beta hydrolase; LOCATED IN: chloroplast; EXPRESSED IN: 23 plant structures; EXPRESSED DURING: 14 growth stages; CONTAINS InterPro DOMAIN/s: Uncharacterised conserved protein UCP031088, alpha/beta hydrolase, At1g15070 (InterPro:IPR016969), Alpha/beta hydrolase fold-1 (Inter…
'35.2'	'not assigned.unknown'	HORVU3Hr1G066440,12	-8.57365	1.73976e-70	'(loc_os01g51040.1 : 960.0) no description available & (at1g73020 : 668.0) unknown protein; FUNCTIONS IN: molecular_function unknown; INVOLVED IN: biological_process unknown; LOCATED IN: cellular_component unknown; EXPRESSED IN: 22 plant structures; EXPRESSED DURING: 13 growth stages; CONTAINS InterPro DOMAIN/s: Protein of unknown function DUF590 (InterPro:IPR007632). & (reliability: 1336.0) & (o…
'35.2'	'not assigned.unknown'	HORVU3Hr1G070340,10	-8.3966	5.35406e-32	' (original description: no original description)'
'35.2'	'not assigned.unknown'	HORVU3Hr1G076880,20	-8.72451	3.58888e-64	'(loc_os12g42700.1 : 488.0) no description available & (at3g54750 : 230.0) unknown protein; FUNCTIONS IN: molecular_function unknown; INVOLVED IN: biological_process unknown; LOCATED IN: cellular_component unknown; EXPRESSED IN: 24 plant structures; EXPRESSED DURING: 15 growth stages. & (reliability: 460.0) & (original description: no original description)'
'35.2'	'not assigned.unknown'	HORVU3Hr1G089910,11	-8.51175	1.05313e-34	' no hits & (original description: no original description)'
'35.2'	'not assigned.unknown'	HORVU3Hr1G092590,1	-10.2336	2.2222e-111	'(loc_os02g19510.3 : 602.0) no description available & (at1g67850 : 534.0) Protein of unknown function (DUF707); CONTAINS InterPro DOMAIN/s: Protein of unknown function DUF707 (InterPro:IPR007877); BEST Arabidopsis thaliana protein match is: Protein of unknown function (DUF707) (TAIR:AT1G13000.2); Has 35333 Blast hits to 34131 proteins in 2444 species: Archae - 798; Bacteria - 22429; Metazoa - 97…
'35.2'	'not assigned.unknown'	HORVU4Hr1G009870,1	-8.45533	1.12213e-22	'(loc_os03g51790.1 : 224.0) no description available & (at3g49725 : 122.0) GTP-binding protein, HflX; FUNCTIONS IN: GTP binding; LOCATED IN: intracellular, chloroplast; CONTAINS InterPro DOMAIN/s: GTP1/OBG (InterPro:IPR006073), GTP-binding protein, HflX (InterPro:IPR016496), GTP-binding protein, HSR1-related (InterPro:IPR002917); BEST Arabidopsis thaliana protein match is: GTP-binding protein, Hf…
'35.2'	'not assigned.unknown'	HORVU4Hr1G031120,1	-8.2384	3.76382e-55	'(loc_os02g31070.3 : 561.0) no description available & (at5g48830 : 267.0) unknown protein; FUNCTIONS IN: molecular_function unknown; INVOLVED IN: biological_process unknown; LOCATED IN: chloroplast; EXPRESSED IN: 22 plant structures; EXPRESSED DURING: 13 growth stages. & (reliability: 534.0) & (original description: no original description)'
'35.2'	'not assigned.unknown'	HORVU4Hr1G057650,15	-9.43879	1.45622e-60	' (original description: no original description)'
'35.2'	'not assigned.unknown'	HORVU5Hr1G019750,1	-8.56605	5.28798e-20	' (original description: no original description)'
'35.2'	'not assigned.unknown'	HORVU5Hr1G057010,6	-8.64024	4.4259e-68	' no hits & (original description: no original description)'
'35.2'	'not assigned.unknown'	HORVU5Hr1G066570,1	-8.55075	4.35624e-71	' (original description: no original description)'
'35.2'	'not assigned.unknown'	HORVU5Hr1G067280,10	-8.57743	1.5272e-51	' (original description: no original description)'
'35.2'	'not assigned.unknown'	HORVU5Hr1G109120,6	-9.58308	4.10224e-126	' (original description: no original description)'
'35.2'	'not assigned.unknown'	HORVU6Hr1G003980,1	-8.26209	4.34296e-30	' no hits & (original description: no original description)'
'35.2'	'not assigned.unknown'	HORVU6Hr1G009480,5	-9.37504	6.62516e-79	'(loc_os02g02520.1 : 154.0) no description available & (at1g73060 : 144.0) Low PSII Accumulation 3 (LPA3); FUNCTIONS IN: molecular_function unknown; INVOLVED IN: biological_process unknown; LOCATED IN: chloroplast stroma, chloroplast; EXPRESSED IN: 22 plant structures; EXPRESSED DURING: 13 growth stages; CONTAINS InterPro DOMAIN/s: Domain of unknown function DUF1995 (InterPro:IPR018962); BEST Ara…
'35.2'	'not assigned.unknown'	HORVU6Hr1G010460,1	-8.45533	2.38942e-10	' no hits & (original description: no original description)'
'35.2'	'not assigned.unknown'	HORVU6Hr1G062800,9	-9.85643	1.32399e-78	'(loc_os02g43850.2 : 461.0) no description available & (at5g51180 : 357.0) alpha/beta-Hydrolases superfamily protein; CONTAINS InterPro DOMAIN/s: Protein of unknown function DUF676, hydrolase-like (InterPro:IPR007751); BEST Arabidopsis thaliana protein match is: alpha/beta-Hydrolases superfamily protein (TAIR:AT4G25770.1); Has 30201 Blast hits to 17322 proteins in 780 species: Archae - 12; Bacter…
'35.2'	'not assigned.unknown'	HORVU6Hr1G075780,1	-8.43045	4.34296e-30	' (original description: no original description)'
'35.2'	'not assigned.unknown'	HORVU6Hr1G077440,6	-8.73132	9.68826e-17	' no hits & (original description: no original description)'
'35.2'	'not assigned.unknown'	HORVU7Hr1G083180,2	-9.61102	8.9863e-65	'(loc_os09g10910.3 : 336.0) no description available & (at1g13380 : 262.0) Protein of unknown function (DUF1218); FUNCTIONS IN: molecular_function unknown; INVOLVED IN: biological_process unknown; LOCATED IN: endomembrane system; EXPRESSED IN: 22 plant structures; EXPRESSED DURING: 13 growth stages; CONTAINS InterPro DOMAIN/s: Protein of unknown function DUF1218 (InterPro:IPR009606); BEST Arabido…
'35.2'	'not assigned.unknown'	HORVU7Hr1G084750,3	-8.69697	5.52668e-26	' (original description: no original description)'
'35.2'	'not assigned.unknown'	HORVU7Hr1G092450,12	-8.20945	1.0567e-77	'(loc_os10g19334.2 : 646.0) no description available & (at4g34260 : 449.0) FUC95A; FUNCTIONS IN: 1,2-alpha-L-fucosidase activity; INVOLVED IN: biological_process unknown; LOCATED IN: endomembrane system; EXPRESSED IN: 22 plant structures; EXPRESSED DURING: 13 growth stages; CONTAINS InterPro DOMAIN/s: Six-hairpin glycosidase-like (InterPro:IPR008928), Uncharacterised conserved protein UCP007663 (…
'35.2'	'not assigned.unknown'	HORVU7Hr1G115520,3	-8.24793	1.70659e-30	'(loc_os06g43650.2 : 277.0) no description available & (at2g25310 : 203.0) FUNCTIONS IN: carbohydrate binding; INVOLVED IN: biological_process unknown; LOCATED IN: endomembrane system; EXPRESSED IN: 22 plant structures; EXPRESSED DURING: 13 growth stages; CONTAINS InterPro DOMAIN/s: Carbohydrate-binding-like fold (InterPro:IPR013784), Protein of unknown function DUF2012 (InterPro:IPR019008); BEST…
'35.2'	'not assigned.unknown'	HORVU0Hr1G010260,3	-9.01123	7.54726e-98	' (original description: no original description)'
'35.2'	'not assigned.unknown'	HORVU0Hr1G020730,5	-8.74483	1.5272e-51	'(loc_os10g35020.1 : 407.0) no description available & (at3g18170 : 192.0) Glycosyltransferase family 61 protein; FUNCTIONS IN: transferase activity, transferring glycosyl groups; INVOLVED IN: biological_process unknown; LOCATED IN: cellular_component unknown; EXPRESSED IN: 8 plant structures; EXPRESSED DURING: petal differentiation and expansion stage; CONTAINS InterPro DOMAIN/s: Glycosyltransfe…
'35.2'	'not assigned.unknown'	HORVU1Hr1G000600,5	-8.80413	1.03655e-37	' (original description: no original description)'
'35.2'	'not assigned.unknown'	HORVU1Hr1G044820,14	-8.91886	1.34062e-32	'(loc_os10g35570.1 : 770.0) no description available & (at2g47960 : 506.0) unknown protein; CONTAINS InterPro DOMAIN/s: Protein of unknown function DUF974 (InterPro:IPR010378); Has 285 Blast hits to 284 proteins in 126 species: Archae - 0; Bacteria - 0; Metazoa - 150; Fungi - 68; Plants - 32; Viruses - 0; Other Eukaryotes - 35 (source: NCBI BLink). & (reliability: 1012.0) & (original description:…
'35.2'	'not assigned.unknown'	HORVU1Hr1G077360,2	-9.06878	1.14007e-19	'(loc_os05g43560.1 : 293.0) no description available & (at2g32170 : 247.0) S-adenosyl-L-methionine-dependent methyltransferases superfamily protein; LOCATED IN: cellular_component unknown; EXPRESSED IN: 24 plant structures; EXPRESSED DURING: 15 growth stages; CONTAINS InterPro DOMAIN/s: N2227-like (InterPro:IPR012901); BEST Arabidopsis thaliana protein match is: S-adenosyl-L-methionine-dependent …
'35.2'	'not assigned.unknown'	HORVU2Hr1G026040,10	-9.02514	1.18082e-56	'(loc_os07g44700.1 : 463.0) no description available & (at3g56750 : 364.0) unknown protein; BEST Arabidopsis thaliana protein match is: unknown protein (TAIR:AT2G41150.2); Has 128 Blast hits to 128 proteins in 16 species: Archae - 0; Bacteria - 0; Metazoa - 0; Fungi - 0; Plants - 117; Viruses - 0; Other Eukaryotes - 11 (source: NCBI BLink). & (reliability: 728.0) & (original description: no origi…
'35.2'	'not assigned.unknown'	HORVU3Hr1G066380,10	-9.20701	2.63696e-35	'(loc_os01g50930.1 : 207.0) no description available & (at5g24314 : 120.0) plastid transcriptionally active7 (PTAC7). & (reliability: 240.0) & (original description: no original description)'
'35.2'	'not assigned.unknown'	HORVU3Hr1G085640,5	-8.90087	1.82457e-61	' (original description: no original description)'
'35.2'	'not assigned.unknown'	HORVU5Hr1G062740,14	-8.87958	4.59606e-41	'(at3g43540 : 124.0) Protein of unknown function (DUF1350); FUNCTIONS IN: molecular_function unknown; INVOLVED IN: biological_process unknown; LOCATED IN: chloroplast; EXPRESSED IN: 22 plant structures; EXPRESSED DURING: 13 growth stages; CONTAINS InterPro DOMAIN/s: Protein of unknown function DUF1350 (InterPro:IPR010765); BEST Arabidopsis thaliana protein match is: Protein of unknown function (D…
'35.2'	'not assigned.unknown'	HORVU5Hr1G066790,2	-8.90689	1.10795e-30	'(loc_os09g34120.1 : 132.0) no description available & (at4g25315 : 89.0) Expressed protein; FUNCTIONS IN: molecular_function unknown; INVOLVED IN: biological_process unknown; LOCATED IN: cellular_component unknown; CONTAINS InterPro DOMAIN/s: Protein of unknown function DUF3128 (InterPro:IPR021475). & (reliability: 178.0) & (original description: no original description)'
'35.2'	'not assigned.unknown'	HORVU5Hr1G085580,3	-8.83605	1.31952e-35	'(loc_os09g01690.1 : 156.0) no description available & (at2g15270 : 116.0) unknown protein; CONTAINS InterPro DOMAIN/s: Protein of unknown function DUF1168 (InterPro:IPR009548); Has 1930 Blast hits to 1364 proteins in 219 species: Archae - 0; Bacteria - 44; Metazoa - 762; Fungi - 280; Plants - 96; Viruses - 3; Other Eukaryotes - 745 (source: NCBI BLink). & (reliability: 232.0) & (original descrip…
'35.2'	'not assigned.unknown'	HORVU5Hr1G114620,3	-9.11114	1.79585e-64	'(loc_os03g60920.1 : 461.0) no description available & (at3g13440 : 240.0) S-adenosyl-L-methionine-dependent methyltransferases superfamily protein; FUNCTIONS IN: methyltransferase activity, nucleic acid binding; INVOLVED IN: methylation, acetate biosynthetic process from carbon monoxide, methanol oxidation; LOCATED IN: cellular_component unknown; EXPRESSED IN: 24 plant structures; EXPRESSED DURI…
'35.2'	'not assigned.unknown'	HORVU6Hr1G000280,23	-8.82337	1.32399e-78	' (original description: no original description)'
'35.2'	'not assigned.unknown'	HORVU6Hr1G022950,13	-9.10852	6.09924e-51	'(loc_os02g05870.2 : 260.0) no description available & (at1g53760 : 159.0) unknown protein; FUNCTIONS IN: molecular_function unknown; INVOLVED IN: biological_process unknown; LOCATED IN: mitochondrion, plastid; EXPRESSED IN: 23 plant structures; EXPRESSED DURING: 13 growth stages; CONTAINS InterPro DOMAIN/s: Protein of unknown function DUF2343 (InterPro:IPR018786). & (reliability: 318.0) & (origi…
'35.2'	'not assigned.unknown'	HORVU7Hr1G048020,3	-8.49586	4.94576e-47	'(loc_os06g27860.1 : 92.4) no description available & (at1g10710 : 84.0) Computational predictions suggested the presence of a small cysteine-rich protein downstream of this gene model (Silverstein 2007), but subsequent analysis revealed that this region contains a tenth exon for the At1g10710 gene which is depicted in the At1g10710.1 gene model.; POOR HOMOLOGOUS SYNAPSIS 1 (PHS1); FUNCTIONS IN: …
'35.2'	'not assigned.unknown'	HORVU7Hr1G064880,17	-8.50383	5.3236e-164	' (original description: no original description)'

## Sheet: C3-21 10d roots_upregulated
List of upregulated genes identified in 10-day-old roots of ckx3 mutant line C1-21. Functional annotation was performed using Mercator sequence annotation tool.
BINCODE	NAME	IDENTIFIER	Log2 fold change	Pvalue	DESCRIPTION
'1.1.1.2'	'PS.lightreaction.photosystem II.PSII polypeptide subunits'	HORVU3Hr1G086190,4	3.52335	0.00014695514653781	'(loc_os01g71190.1 : 207.0) no description available & (at4g28660 : 179.0) Similar to PsbW subunit of photosystem II.; photosystem II reaction center PSB28 protein (PSB28); FUNCTIONS IN: molecular_function unknown; INVOLVED IN: photosynthesis; LOCATED IN: chloroplast thylakoid membrane, photosystem II reaction center; EXPRESSED IN: 22 plant structures; EXPRESSED DURING: 13 growth stages; CONTAINS…
'2.2.2.1'	'major CHO metabolism.degradation.starch.starch cleavage'	HORVU7Hr1G028010,14	3.44723	0.000210859573977065	'(loc_os07g23880.1 : 1306.0) no description available & (at3g23640 : 1050.0) heteroglycan glucosidase 1 (HGL1); FUNCTIONS IN: hydrolase activity, hydrolyzing O-glycosyl compounds; INVOLVED IN: carbohydrate metabolic process; LOCATED IN: chloroplast; EXPRESSED IN: 22 plant structures; EXPRESSED DURING: 13 growth stages; CONTAINS InterPro DOMAIN/s: Glycoside hydrolase, family 31 (InterPro:IPR000322…
'3.2.2'	'minor CHO metabolism.trehalose.TPP'	HORVU2Hr1G029290,2	2.13615	8.75955690755459e-06	'(at2g22190 : 155.0) Haloacid dehalogenase-like hydrolase (HAD) superfamily protein; FUNCTIONS IN: catalytic activity, trehalose-phosphatase activity; INVOLVED IN: trehalose biosynthetic process, metabolic process; LOCATED IN: cellular_component unknown; EXPRESSED IN: 23 plant structures; EXPRESSED DURING: 12 growth stages; CONTAINS InterPro DOMAIN/s: HAD-superfamily hydrolase, subfamily IIB (Int…
'4.1.13'	'glycolysis.cytosolic branch.enolase'	HORVU7Hr1G017640,12	5.78107	1.37064844033052e-11	'(loc_os06g04510.1 : 678.0) no description available & (p26301|eno1_maize : 654.0) Enolase 1 (EC 4.2.1.11) (2-phosphoglycerate dehydratase 1) (2-phospho-D-glycerate hydro-lyase 1) - Zea mays (Maize) & (at2g36530 : 604.0) Involved in light-dependent cold tolerance and encodes an enolase. Protein is tyrosine-phosphorylated and its phosphorylation state is modulated in response to ABA in Arabidopsis…
'7.1.1'	'OPP.oxidative PP.G6PD'	HORVU2Hr1G010520,10	4.75419	4.48553341801464e-08	'(loc_os07g22350.1 : 953.0) no description available & (at5g13110 : 852.0) Encodes a plastidic glucose-6-phosphate dehydrogenase that is sensitive to reduction by DTT and whose mRNA is most highly expressed in root.; glucose-6-phosphate dehydrogenase 2 (G6PD2); CONTAINS InterPro DOMAIN/s: Glucose-6-phosphate dehydrogenase, C-terminal (InterPro:IPR022675), Glucose-6-phosphate dehydrogenase, active…
'8.1.7'	'TCA / org transformation.TCA.succinate dehydrogenase'	HORVU2Hr1G061040,10	5.26434	5.88818291489449e-10	'(q6zdy8|dhsa_orysa : 919.0) Succinate dehydrogenase [ubiquinone] flavoprotein subunit, mitochondrial precursor (EC 1.3.5.1) (FP) (Flavoprotein subunit of complex II) - Oryza sativa (Rice) & (loc_os07g04240.1 : 919.0) no description available & (at5g66760 : 892.0) One of two genes in Arabidopsis that encode a flavoprotein subunit of the mitochondrial succinate dehydrogenase complex.; succinate de…
'8.2.10'	'TCA / org transformation.other organic acid transformatons.malic'	HORVU1Hr1G028030,15	4.80291	4.44240642338794e-09	'(loc_os05g09440.1 : 548.0) no description available & (p43279|maoc_orysa : 416.0) NADP-dependent malic enzyme, chloroplast precursor (EC 1.1.1.40) (NADP-ME) - Oryza sativa (Rice) & (at5g11670 : 407.0) The malic enzyme (EC 1.1.1.40) encoded by AtNADP-ME2 is presumably a cytosolic enzyme involved in malate metabolism and possibly assisting the oxidative pentose phosphate pathway. AtNADP-ME2 counts…
'8.3'	'TCA / org transformation.carbonic anhydrases'	HORVU5Hr1G069600,14	4.30824	2.55200261006633e-06	'(loc_os09g28910.5 : 211.0) no description available & (at4g33580 : 132.0) beta carbonic anhydrase 5 (BCA5); FUNCTIONS IN: carbonate dehydratase activity, zinc ion binding; INVOLVED IN: carbon utilization; LOCATED IN: chloroplast; EXPRESSED IN: 25 plant structures; EXPRESSED DURING: 13 growth stages; CONTAINS InterPro DOMAIN/s: Carbonic anhydrase, prokaryotic-like, conserved site (InterPro:IPR015…
'9.8'	'mitochondrial electron transport / ATP synthesis.uncoupling protein'	HORVU5Hr1G069700,5	3.90655	1.55601502014507e-05	'(loc_os08g37370.1 : 431.0) no description available & (at2g22500 : 342.0) Encodes one of the mitochondrial dicarboxylate carriers (DIC): DIC1 (AT2G22500), DIC2 (AT4G24570), DIC3 (AT5G09470).; uncoupling protein 5 (UCP5); FUNCTIONS IN: binding, dicarboxylic acid transmembrane transporter activity; INVOLVED IN: transport, mitochondrial transport; LOCATED IN: mitochondrion, mitochondrial inner memb…
'9.99'	'mitochondrial electron transport / ATP synthesis.unspecified'	HORVU6Hr1G019930,4	3.81377	2.73461241589637e-05	'(loc_os01g21610.1 : 387.0) no description available & (at4g01660 : 313.0) Encodes an ABC1-like protein, member of the ATH subfamily; putative ABC transporter; isolated by functional complementation of a yeast abc1 mutant; ABC transporter 1 (ABC1); CONTAINS InterPro DOMAIN/s: ABC-1 (InterPro:IPR004147), Protein kinase-like domain (InterPro:IPR011009); BEST Arabidopsis thaliana protein match is: A…
'10.3'	'cell wall.hemicellulose synthesis'	HORVU3Hr1G009940,19	3.47708	0.000169412968900126	'(loc_os03g58920.1 : 217.0) no description available & (at5g62620 : 180.0) Galactosyltransferase family protein; FUNCTIONS IN: transferase activity, transferring hexosyl groups, sugar binding, galactosyltransferase activity; INVOLVED IN: protein amino acid glycosylation; EXPRESSED IN: 22 plant structures; EXPRESSED DURING: 13 growth stages; CONTAINS InterPro DOMAIN/s: Galectin, carbohydrate recog…
'10.6.1'	'cell wall.degradation.cellulases and beta -1,4-glucanases'	HORVU1Hr1G085830,2	2.39565	2.7703328299857e-08	'(q6l4i2|gun15_orysa : 403.0) Endoglucanase 15 precursor (EC 3.2.1.4) (Endo-1,4-beta glucanase 15) - Oryza sativa (Rice) & (loc_os05g12150.1 : 403.0) no description available & (at1g64390 : 338.0) glycosyl hydrolase 9C2 (GH9C2); FUNCTIONS IN: carbohydrate binding, hydrolase activity, hydrolyzing O-glycosyl compounds, catalytic activity; INVOLVED IN: carbohydrate metabolic process; LOCATED IN: end…
'10.6.3'	'cell wall.degradation.pectate lyases and polygalacturonases'	HORVU1Hr1G079170,11	6.6826	2.62614157301813e-18	'(loc_os05g46510.1 : 355.0) no description available & (at1g80170 : 213.0) Pectin lyase-like superfamily protein; FUNCTIONS IN: polygalacturonase activity; INVOLVED IN: carbohydrate metabolic process; LOCATED IN: plant-type cell wall; EXPRESSED IN: 15 plant structures; EXPRESSED DURING: 6 growth stages; CONTAINS InterPro DOMAIN/s: Pectin lyase fold/virulence factor (InterPro:IPR011050), Pectin ly…
'11.1.8'	'lipid metabolism.FA synthesis and FA elongation.acyl coa ligase'	HORVU2Hr1G120150,3	4.55644	6.54452299191205e-07	'(loc_os04g57850.1 : 944.0) no description available & (at5g16370 : 683.0) acyl activating enzyme 5 (AAE5); FUNCTIONS IN: catalytic activity; INVOLVED IN: metabolic process; LOCATED IN: peroxisome; EXPRESSED IN: leaf; CONTAINS InterPro DOMAIN/s: AMP-binding, conserved site (InterPro:IPR020845), AMP-dependent synthetase/ligase (InterPro:IPR000873); BEST Arabidopsis thaliana protein match is: AMP-d…
'11.1.9'	'lipid metabolism.FA synthesis and FA elongation.long chain fatty acid CoA ligase'	HORVU5Hr1G052100,24	3.56951	0.00010959587397993	'(loc_os05g25310.2 : 1315.0) no description available & (at2g04350 : 1000.0) long-chain acyl-CoA synthetase 8 (LACS8); FUNCTIONS IN: long-chain fatty acid-CoA ligase activity, catalytic activity; INVOLVED IN: fatty acid biosynthetic process, metabolic process; LOCATED IN: endoplasmic reticulum; EXPRESSED IN: 23 plant structures; EXPRESSED DURING: 13 growth stages; CONTAINS InterPro DOMAIN/s: AMP-…
'11.8'	'lipid metabolism.'exotics'(steroids, squalene etc)'	HORVU7Hr1G122470,1	2.05308	0.000147891322776144	'(loc_os09g38239.1 : 395.0) no description available & (at1g13430 : 254.0) Encodes a sulfotransferase. Unlike the related ST4A protein (At2g14920), in vitro experiements show that this enzyme does not act brassinosteroids. ST4C is expressed in the roots and transcript levels rise in response to cytokinin treatment.; sulfotransferase 4C (ST4C); CONTAINS InterPro DOMAIN/s: Sulfotransferase domain (…
'11.8.3'	'lipid metabolism.'exotics' (steroids, squalene etc).UDP-glucose:sterol glucosyltransferase'	HORVU3Hr1G083200,1	4.10342	6.177725183737e-06	'(loc_os01g64750.1 : 377.0) no description available & (at1g43620 : 293.0) Encodes a UDP-glucose:sterol-glucosyltransferase.; UGT80B1; FUNCTIONS IN: transferase activity, transferring glycosyl groups, sterol 3-beta-glucosyltransferase activity; LOCATED IN: plasma membrane; EXPRESSED IN: 25 plant structures; EXPRESSED DURING: 14 growth stages; CONTAINS InterPro DOMAIN/s: Glycosyl transferase, fami…
'11.9.2.1'	'lipid metabolism.lipid degradation.lipases.triacylglycerol lipase'	HORVU3Hr1G089130,23	3.82008	3.29282891921828e-05	'(loc_os01g67420.1 : 309.0) no description available & (at1g05790 : 173.0) lipase class 3 family protein; FUNCTIONS IN: triglyceride lipase activity; INVOLVED IN: lipid metabolic process; EXPRESSED IN: 24 plant structures; EXPRESSED DURING: 15 growth stages; CONTAINS InterPro DOMAIN/s: Lipase, class 3 (InterPro:IPR002921); BEST Arabidopsis thaliana protein match is: alpha/beta-Hydrolases superfam…
'11.9.3.1'	'lipid metabolism.lipid degradation.lysophospholipases.phospholipase D'	HORVU1Hr1G025370,4	3.54054	0.000127046066052598	'(loc_os05g07880.2 : 1476.0) no description available & (q43007|plda1_orysa : 1363.0) Phospholipase D alpha 1 precursor (EC 3.1.4.4) (PLD alpha 1) (Choline phosphatase 1) (Phosphatidylcholine-hydrolyzing phospholipase D 1) - Oryza sativa (Rice) & (at3g15730 : 1264.0) Encodes phospholipase D alpha 1 (PLD alpha 1). Positive regulator of abscisic acid (ABA) mediated stomatal movements. PLD alpha 1 p…
'11.9.3.3'	'lipid metabolism.lipid degradation.lysophospholipases.glycerophosphodiester phosphodiesterase'	HORVU1Hr1G002460,2	5.07052	2.42655793836233e-09	'(loc_os01g02800.1 : 563.0) no description available & (at1g66920 : 296.0) Protein kinase superfamily protein; FUNCTIONS IN: protein serine/threonine kinase activity, protein kinase activity, kinase activity, ATP binding; INVOLVED IN: protein amino acid phosphorylation; LOCATED IN: endomembrane system; CONTAINS InterPro DOMAIN/s: Protein kinase, ATP binding site (InterPro:IPR017441), Serine/threo…
'11.9.3.3'	'lipid metabolism.lipid degradation.lysophospholipases.glycerophosphodiester phosphodiesterase'	HORVU2Hr1G070700,17	3.58271	0.000108116230000933	'(loc_os02g31030.1 : 479.0) no description available & (at5g41080 : 397.0) PLC-like phosphodiesterases superfamily protein; FUNCTIONS IN: phosphoric diester hydrolase activity, glycerophosphodiester phosphodiesterase activity; INVOLVED IN: glycerol metabolic process, lipid metabolic process; EXPRESSED IN: 23 plant structures; EXPRESSED DURING: 14 growth stages; CONTAINS InterPro DOMAIN/s: PLC-lik…
'11.9.4.2'	'lipid metabolism.lipid degradation.beta-oxidation.acyl CoA DH'	HORVU4Hr1G027270,79	5.18051	6.88724343583588e-10	'(loc_os07g47820.2 : 134.0) no description available & (at3g06810 : 98.6) Encodes a protein with similarity to acyl-CoA dehydrogenases. Mutations in IBR3 render plants resistant to indole-3-butryic acid, a putative storage form of the biologically active auxin IAA (indole-3-acetic acid). IBR3 is hypothesized to carry out the second step in a &#946;-oxidation-like process of IBA metabolism in Arab…
'13.1.5.3.1'	'amino acid metabolism.synthesis.serine-glycine-cysteine group.cysteine.OASTL'	HORVU6Hr1G063480,2	2.3867	1.93872549088261e-05	'(loc_os02g12900.1 : 295.0) no description available & (p32260|cyskp_spiol : 189.0) Cysteine synthase, chloroplast precursor (EC 2.5.1.47) (O-acetylserine sulfhydrylase) (O-acetylserine (Thiol)-lyase) (CSase B) (CS-B) (OAS-TL B) - Spinacia oleracea (Spinach) & (at3g59760 : 184.0) Arabidopsis thaliana O-acetylserine (thiol) lyase (OAS-TL) isoform oasC; O-acetylserine (thiol) lyase isoform C (OASC)…
'13.1.5.3.1'	'amino acid metabolism.synthesis.serine-glycine-cysteine group.cysteine.OASTL'	HORVU6Hr1G063480,3	2.40496	0.000190142661339927	'(loc_os02g12900.1 : 295.0) no description available & (p32260|cyskp_spiol : 189.0) Cysteine synthase, chloroplast precursor (EC 2.5.1.47) (O-acetylserine sulfhydrylase) (O-acetylserine (Thiol)-lyase) (CSase B) (CS-B) (OAS-TL B) - Spinacia oleracea (Spinach) & (at3g59760 : 184.0) Arabidopsis thaliana O-acetylserine (thiol) lyase (OAS-TL) isoform oasC; O-acetylserine (thiol) lyase isoform C (OASC)…
'13.1.6.4.3'	'amino acid metabolism.synthesis.aromatic aa.tyrosine.tyrosine transaminase'	HORVU4Hr1G031510,19	3.87462	3.62846865836679e-06	'(loc_os11g42510.1 : 518.0) no description available & (at5g53970 : 237.0) encodes tyrosine aminotransferase which is strongly induced upon aging and coronatine treatment; Tyrosine transaminase family protein; CONTAINS InterPro DOMAIN/s: 1-aminocyclopropane-1-carboxylate synthase (InterPro:IPR001176), Aminotransferase, class I/classII (InterPro:IPR004839), Pyridoxal phosphate-dependent transferas…
'13.1.6.5.4'	'amino acid metabolism.synthesis.aromatic aa.tryptophan.indole-3-glycerol phosphate synthase'	HORVU5Hr1G052150,8	4.06245	2.72759004442319e-06	'(loc_os09g08130.2 : 273.0) no description available & (at5g48220 : 153.0) Aldolase-type TIM barrel family protein; FUNCTIONS IN: indole-3-glycerol-phosphate synthase activity, catalytic activity; INVOLVED IN: metabolic process, tryptophan metabolic process; EXPRESSED IN: 22 plant structures; EXPRESSED DURING: 13 growth stages; CONTAINS InterPro DOMAIN/s: Aldolase-type TIM barrel (InterPro:IPR013…
'13.2.5.3'	'amino acid metabolism.degradation.serine-glycine-cysteine group.cysteine'	HORVU6Hr1G027390,16	3.09468	0.000239225886281171	'(loc_os02g07044.1 : 305.0) no description available & (at1g79230 : 255.0) encodes a sulfurtransferase/rhodaneses, which belongs to a group of enzymes widely distributed in all three phyla that catalyze the transfer of sulfur from a donor to a thiophilic acceptor substrate. The protein and transcript levels are NOT affected by senescence or exogenous cyanide, suggesting that sulfurtransferases ar…
'16.1.1.2'	'secondary metabolism.isoprenoids.non-mevalonate pathway.DXR'	HORVU3Hr1G000390,4	3.42622	0.00023757357799231	'(q8w250|dxr_orysa : 786.0) 1-deoxy-D-xylulose 5-phosphate reductoisomerase, chloroplast precursor (EC 1.1.1.267) (DXP reductoisomerase) (1-deoxyxylulose-5-phosphate reductoisomerase) (2-C-methyl-D-erythritol 4-phosphate synthase) - Oryza sativa (Rice) & (loc_os01g01710.1 : 786.0) no description available & (at5g62790 : 756.0) 1-Deoxy-d-xylulose 5-phosphate reductoisomerase (DXR) catalyzes the fi…
'16.1.2.8'	'secondary metabolism.isoprenoids.mevalonate pathway.geranyl diphosphate synthase'	HORVU1Hr1G091880,4	2.07333	5.78621249869865e-06	'(loc_os05g50550.1 : 557.0) no description available & (at1g78510 : 463.0) Encodes a protein with solanesyl diphosphate synthase activity.; solanesyl diphosphate synthase 1 (SPS1); CONTAINS InterPro DOMAIN/s: Solanesyl diphosphate synthase (InterPro:IPR014120), Terpenoid synthase (InterPro:IPR008949), Polyprenyl synthetase-related (InterPro:IPR017446), Polyprenyl synthetase (InterPro:IPR000092); …
'16.2'	'secondary metabolism.phenylpropanoids'	HORVU5Hr1G073820,7	4.2895	1.32555072749706e-06	'(loc_os09g31502.1 : 448.0) no description available & (at1g76470 : 290.0) NAD(P)-binding Rossmann-fold superfamily protein; FUNCTIONS IN: coenzyme binding, binding, cinnamoyl-CoA reductase activity, catalytic activity; INVOLVED IN: lignin biosynthetic process, cellular metabolic process, metabolic process; LOCATED IN: endomembrane system; EXPRESSED IN: leaf whorl, sepal, male gametophyte, flower…
'16.2.1.1'	'secondary metabolism.phenylpropanoids.lignin biosynthesis.PAL'	HORVU2Hr1G038120,4	4.15843	3.90400380477336e-06	'(loc_os04g43800.1 : 1260.0) no description available & (q43210|paly_wheat : 1252.0) Phenylalanine ammonia-lyase (EC 4.3.1.5) - Triticum aestivum (Wheat) & (at2g37040 : 1044.0) Encodes PAL1, a phenylalanine ammonia-lyase. Arabidopsis has four PALs: AT2G37040 (PAL1), AT3G53260 (PAL2), AT5G04230 (PAL3) and AT3G10340 (PAL4).; PHE ammonia lyase 1 (PAL1); FUNCTIONS IN: phenylalanine ammonia-lyase acti…
'16.2.1.10'	'secondary metabolism.phenylpropanoids.lignin biosynthesis.CAD'	HORVU3Hr1G097140,1	4.1494	4.76250834802431e-06	'(loc_os10g11810.2 : 573.0) no description available & (at1g72680 : 496.0) cinnamyl-alcohol dehydrogenase (CAD1); FUNCTIONS IN: oxidoreductase activity, oxidoreductase activity, acting on the CH-OH group of donors, NAD or NADP as acceptor, zinc ion binding, cofactor binding; INVOLVED IN: lignin biosynthetic process; EXPRESSED IN: 25 plant structures; EXPRESSED DURING: 13 growth stages; CONTAINS I…
'16.5.1.1.1.8'	'secondary metabolism.sulfur-containing.glucosinolates.synthesis.aliphatic.UDP-glycosyltransferase'	HORVU2Hr1G114190,7	3.94547	1.24311754083449e-05	'(loc_os04g12980.1 : 452.0) no description available & (at1g05680 : 241.0) Encodes a UDP-glucosyltransferase, UGT74E2, that acts on IBA (indole-3-butyric acid) and affects auxin homeostasis. The transcript and protein levels of this enzyme are strongly induced by H2O2 and may allow integration of ROS (reactive oxygen species) and auxin signaling. This enzyme can also transfer glycosyl groups to s…
'16.5.1.1.1.8'	'secondary metabolism.sulfur-containing.glucosinolates.synthesis.aliphatic.UDP-glycosyltransferase'	HORVU5Hr1G047150,4	3.28737	9.68823408891863e-05	'(loc_os04g12970.1 : 185.0) no description available & (at1g05675 : 136.0) UDP-Glycosyltransferase superfamily protein; FUNCTIONS IN: transferase activity, transferring hexosyl groups; INVOLVED IN: metabolic process; CONTAINS InterPro DOMAIN/s: UDP-glucuronosyl/UDP-glucosyltransferase (InterPro:IPR002213); BEST Arabidopsis thaliana protein match is: Uridine diphosphate glycosyltransferase 74E2 (T…
'16.8.1'	'secondary metabolism.flavonoids.anthocyanins'	HORVU1Hr1G015050,5	3.16078	9.93124836387314e-05	'(loc_os05g03640.1 : 489.0) no description available & (at3g11180 : 393.0) 2-oxoglutarate (2OG) and Fe(II)-dependent oxygenase superfamily protein; FUNCTIONS IN: oxidoreductase activity, iron ion binding; INVOLVED IN: oxidation reduction; LOCATED IN: cellular_component unknown; EXPRESSED IN: inflorescence meristem, male gametophyte, flower, pollen tube; EXPRESSED DURING: L mature pollen stage, M …
'16.8.1'	'secondary metabolism.flavonoids.anthocyanins'	HORVU4Hr1G056500,6	3.93241	7.85366759388863e-06	'(loc_os03g18030.1 : 426.0) no description available & (at3g11180 : 299.0) 2-oxoglutarate (2OG) and Fe(II)-dependent oxygenase superfamily protein; FUNCTIONS IN: oxidoreductase activity, iron ion binding; INVOLVED IN: oxidation reduction; LOCATED IN: cellular_component unknown; EXPRESSED IN: inflorescence meristem, male gametophyte, flower, pollen tube; EXPRESSED DURING: L mature pollen stage, M …
'17'	'hormone metabolism'	HORVU3Hr1G098340,1	3.32453	2.71759029099334e-07	'(q43360|pir7b_orysa : 407.0) Esterase PIR7B (EC 3.1.-.-) - Oryza sativa (Rice) & (loc_os01g70850.1 : 407.0) no description available & (at2g23600 : 188.0) Encodes a protein shown to have carboxylesterase activity, methyl salicylate esterase activity, methyl jasmonate esterase activity, and methyl IAA esterase activity in vitro. MES2 appears to be involved in MeSA hydrolysis in planta. This prote…
'17.2.2'	'hormone metabolism.auxin.signal transduction'	HORVU1Hr1G021550,4	3.63724	7.55703077439272e-05	'(loc_os05g05800.1 : 444.0) no description available & (at3g62980 : 332.0) Encodes an auxin receptor that mediates auxin-regulated transcription. It contains leucine-rich repeats and an F-box and interacts with ASK1, ASK2 and AtCUL1 to form SCF-TIR1, an SCF ubiquitin ligase complex. Related to yeast Grr1p and human SKP2 proteins, involved in ubiquitin-mediated processes. Required for normal respo…
'17.2.3'	'hormone metabolism.auxin.induced-regulated-responsive-activated'	HORVU5Hr1G086560,20	4.49481	3.92702252946113e-07	'(loc_os09g37590.1 : 704.0) no description available & (at1g20550 : 586.0) O-fucosyltransferase family protein; FUNCTIONS IN: molecular_function unknown; INVOLVED IN: biological_process unknown; LOCATED IN: mitochondrion; EXPRESSED IN: 21 plant structures; EXPRESSED DURING: 10 growth stages; CONTAINS InterPro DOMAIN/s: GDP-fucose protein O-fucosyltransferase (InterPro:IPR019378); BEST Arabidopsis…
'17.3.1.1.1'	'hormone metabolism.brassinosteroid.synthesis-degradation.BRs.DET2'	HORVU1Hr1G013970,1	3.41955	8.13073079747552e-05	'(loc_os07g06800.1 : 325.0) no description available & (at5g16010 : 241.0) 3-oxo-5-alpha-steroid 4-dehydrogenase family protein; FUNCTIONS IN: oxidoreductase activity, acting on the CH-CH group of donors, 3-oxo-5-alpha-steroid 4-dehydrogenase activity; INVOLVED IN: lipid metabolic process; LOCATED IN: chloroplast, chloroplast envelope; EXPRESSED IN: 23 plant structures; EXPRESSED DURING: 15 growt…
'17.3.2.1'	'hormone metabolism.brassinosteroid.signal transduction.BRI'	HORVU7Hr1G099390,9	3.79903	8.08434047738383e-06	'(loc_os06g47470.1 : 236.0) no description available & (at4g23310 : 95.1) Encodes a cysteine-rich receptor-like protein kinase.; cysteine-rich RLK (RECEPTOR-like protein kinase) 23 (CRK23); FUNCTIONS IN: protein serine/threonine kinase activity, protein kinase activity, ATP binding; INVOLVED IN: defense response; LOCATED IN: endomembrane system; EXPRESSED IN: stem, leaf whorl, leaf; EXPRESSED DUR…
'17.4.1'	'hormone metabolism.cytokinin.synthesis-degradation'	HORVU7Hr1G010370,2	2.48748	5.85467383300616e-16	'(loc_os08g31200.1 : 725.0) no description available & (at1g22360 : 530.0) UDP-glucosyl transferase 85A2 (UGT85A2); FUNCTIONS IN: UDP-glycosyltransferase activity, transferase activity, transferring glycosyl groups, glucuronosyltransferase activity; INVOLVED IN: metabolic process; LOCATED IN: cellular_component unknown; EXPRESSED IN: 21 plant structures; EXPRESSED DURING: 11 growth stages; CONTAI…
'17.4.1'	'hormone metabolism.cytokinin.synthesis-degradation'	HORVU3Hr1G019850,4	0.53	0.435605239540531	'(loc_os01g09260.1 : 169.0) no description available & (q9t0n8|ckx1_maize : 166.0) Cytokinin dehydrogenase 1 precursor (EC 1.5.99.12) (Cytokinin oxidase 1) (CKO 1) (COX 1) (ZmCKX1) - Zea mays (Maize) & (at4g29740 : 133.0) It encodes a protein whose sequence is similar to cytokinin oxidase/dehydrogenase, which catalyzes the degradation of cytokinins.; cytokinin oxidase 4 (CKX4); FUNCTIONS IN: prim…
'17.6.1.13'	'hormone metabolism.gibberelin.synthesis-degradation.GA2 oxidase'	HORVU1Hr1G076730,4	4.10507	5.90010334598919e-06	'(loc_os05g43880.1 : 353.0) no description available & (q9sq80|g2ox1_pea : 253.0) Gibberellin 2-beta-dioxygenase 1 (EC 1.14.11.13) (Gibberellin 2-beta-hydroxylase 1) (Gibberellin 2-oxidase 1) (GA 2-oxidase 1) (Protein SLENDER) - Pisum sativum (Garden pea) & (at1g30040 : 227.0) Encodes a gibberellin 2-oxidase that acts on C-19 gibberellins. AtGA2OX2 expression is responsive to cytokinin and KNOX a…
'17.6.1.13'	'hormone metabolism.gibberelin.synthesis-degradation.GA2 oxidase'	HORVU3Hr1G072810,2	2.36843	5.48214224516949e-05	'(loc_os01g55240.1 : 392.0) no description available & (q9sq80|g2ox1_pea : 248.0) Gibberellin 2-beta-dioxygenase 1 (EC 1.14.11.13) (Gibberellin 2-beta-hydroxylase 1) (Gibberellin 2-oxidase 1) (GA 2-oxidase 1) (Protein SLENDER) - Pisum sativum (Garden pea) & (at1g30040 : 221.0) Encodes a gibberellin 2-oxidase that acts on C-19 gibberellins. AtGA2OX2 expression is responsive to cytokinin and KNOX a…
'17.7.1.2'	'hormone metabolism.jasmonate.synthesis-degradation.lipoxygenase'	HORVU2Hr1G115960,2	4.56263	3.60478408722836e-13	'(at3g22400 : 462.0) LOX5; FUNCTIONS IN: oxidoreductase activity, acting on single donors with incorporation of molecular oxygen, incorporation of two atoms of oxygen, lipoxygenase activity, iron ion binding, metal ion binding; INVOLVED IN: root development; LOCATED IN: chloroplast; EXPRESSED IN: 22 plant structures; EXPRESSED DURING: 13 growth stages; CONTAINS InterPro DOMAIN/s: Lipoxygenase, LH…
'17.7.1.2'	'hormone metabolism.jasmonate.synthesis-degradation.lipoxygenase'	HORVU7Hr1G050680,6	3.62982	3.621141430803e-05	'(q84yk8|loxc2_orysa : 653.0) Probable lipoxygenase 8, chloroplast precursor (EC 1.13.11.12) - Oryza sativa (Rice) & (loc_os08g39850.2 : 653.0) no description available & (at3g45140 : 476.0) Chloroplast lipoxygenase required for wound-induced jasmonic acid accumulation in Arabidopsis.Mutants are resistant to Staphylococcus aureus and accumulate salicylic acid upon infection.; lipoxygenase 2 (LOX2…
'17.7.1.5'	'hormone metabolism.jasmonate.synthesis-degradation.12-Oxo-PDA-reductase'	HORVU7Hr1G036070,12	3.33099	2.77276842076232e-09	'(loc_os06g11290.1 : 309.0) no description available & (at1g76690 : 242.0) Encodes one of the closely related 12-oxophytodienoic acid reductases. This enzyme is not expected to participate in jasmonic acid biosynthesis because during in vitro assays, it shows very little activity with the naturally occurring OPDA isomer. Shows activity towards 2,4,6-trinitrotoluene. Expressed predominately in roo…
'17.7.1.5'	'hormone metabolism.jasmonate.synthesis-degradation.12-Oxo-PDA-reductase'	HORVU7Hr1G036070,5	3.13991	1.72123925506709e-07	'(loc_os06g11290.1 : 309.0) no description available & (at1g76690 : 242.0) Encodes one of the closely related 12-oxophytodienoic acid reductases. This enzyme is not expected to participate in jasmonic acid biosynthesis because during in vitro assays, it shows very little activity with the naturally occurring OPDA isomer. Shows activity towards 2,4,6-trinitrotoluene. Expressed predominately in roo…
'17.7.1.5'	'hormone metabolism.jasmonate.synthesis-degradation.12-Oxo-PDA-reductase'	HORVU7Hr1G036070,6	3.64548	9.73581296965417e-08	'(loc_os06g11290.1 : 309.0) no description available & (at1g76690 : 242.0) Encodes one of the closely related 12-oxophytodienoic acid reductases. This enzyme is not expected to participate in jasmonic acid biosynthesis because during in vitro assays, it shows very little activity with the naturally occurring OPDA isomer. Shows activity towards 2,4,6-trinitrotoluene. Expressed predominately in roo…
'18.2'	'Co-factor and vitamine metabolism.thiamine'	HORVU4Hr1G022990,11	4.52823	2.37342188859081e-07	'(loc_os01g11880.1 : 165.0) no description available & (at1g53280 : 105.0) Class I glutamine amidotransferase-like superfamily protein; INVOLVED IN: biological_process unknown; LOCATED IN: chloroplast; EXPRESSED IN: 23 plant structures; EXPRESSED DURING: 13 growth stages; CONTAINS InterPro DOMAIN/s: DJ-1 (InterPro:IPR006287), ThiJ/PfpI (InterPro:IPR002818); BEST Arabidopsis thaliana protein match…
'18.4.2'	'Co-factor and vitamine metabolism.pantothenate.3-methyl-2-oxobutanoate hydroxymethyltransferase (KPHMT,PANB)'	HORVU3Hr1G030620,3	3.76846	3.72056539741948e-05	'(loc_os01g12560.1 : 547.0) no description available & (at2g46110 : 478.0) Encodes a ketopentoate hydroxymethyltransferase that appears to localize to the mitochondria. This protein is expected to play a role in pantothenate (vitamin B5) biosynthesis.; ketopantoate hydroxymethyltransferase 1 (KPHMT1); CONTAINS InterPro DOMAIN/s: Pyruvate/Phosphoenolpyruvate kinase, catalytic core (InterPro:IPR015…
'20'	'stress'	HORVU2Hr1G044910,74	4.32388	1.19188541468019e-06	'(loc_os07g34980.1 : 249.0) no description available & (at4g23280 : 166.0) Encodes a cysteine-rich receptor-like protein kinase.; cysteine-rich RLK (RECEPTOR-like protein kinase) 20 (CRK20); FUNCTIONS IN: kinase activity; INVOLVED IN: defense response to bacterium, defense response, programmed cell death, response to salicylic acid stimulus; LOCATED IN: chloroplast; EXPRESSED IN: 18 plant structu…
'20'	'stress'	HORVU5Hr1G084860,6	5.09762	2.87958314354319e-09	'(loc_os07g35310.1 : 382.0) no description available & (at4g23180 : 309.0) Encodes a receptor-like protein kinase. Naming convention from Chen et al 2003 (PMID 14756307); cysteine-rich RLK (RECEPTOR-like protein kinase) 10 (CRK10); FUNCTIONS IN: protein serine/threonine kinase activity, protein kinase activity, kinase activity, ATP binding; INVOLVED IN: protein amino acid phosphorylation; LOCATED…
'20.1'	'stress.biotic'	HORVU2Hr1G076870,8	4.70443	6.16484870622949e-08	'(loc_os04g36030.1 : 343.0) no description available & (at1g33970 : 189.0) P-loop containing nucleoside triphosphate hydrolases superfamily protein; FUNCTIONS IN: GTP binding; INVOLVED IN: response to bacterium; LOCATED IN: cellular_component unknown; EXPRESSED IN: 22 plant structures; EXPRESSED DURING: 13 growth stages; CONTAINS InterPro DOMAIN/s: AIG1 (InterPro:IPR006703); BEST Arabidopsis thal…
'20.1'	'stress.biotic'	HORVU7Hr1G046370,2	3.87179	2.26348930248689e-05	'(loc_os12g09240.1 : 419.0) no description available & (at3g46730 : 171.0) NB-ARC domain-containing disease resistance protein; FUNCTIONS IN: ATP binding; INVOLVED IN: defense response, apoptosis; LOCATED IN: endomembrane system; CONTAINS InterPro DOMAIN/s: NB-ARC (InterPro:IPR002182), Disease resistance protein (InterPro:IPR000767); BEST Arabidopsis thaliana protein match is: NB-ARC domain-conta…
'20.1'	'stress.biotic'	HORVU7Hr1G111630,6	5.34008	4.97507234129014e-10	'(loc_os07g27370.1 : 192.0) no description available & (at3g46530 : 87.0) Confers resistance to the biotrophic oomycete, Peronospora parasitica. Encodes an NBS-LRR type R protein with a putative amino-terminal leucine zipper. Fungal protein ATR13 induces RPP13 gene expression and disease resistance.; RECOGNITION OF PERONOSPORA PARASITICA 13 (RPP13); FUNCTIONS IN: ATP binding; INVOLVED IN: defense…
'20.1'	'stress.biotic'	HORVU7Hr1G111700,2	3.74976	3.9647900809536e-05	'(loc_os07g27370.1 : 494.0) no description available & (at3g07040 : 190.0) Contains an N-terminal tripartite nucleotide binding site and a C-terminal tandem array of leucine-rich repeats. Confers resistance to Pseudomonas syringae strains that carry the avirulence genes avrB and avrRpm1.; RESISTANCE TO P. SYRINGAE PV MACULICOLA 1 (RPM1); FUNCTIONS IN: protein binding, nucleotide binding; INVOLVED…
'20.1.7'	'stress.biotic.PR-proteins'	HORVU2Hr1G006040,4	4.34377	5.86535576643956e-08	'(loc_os02g18000.1 : 465.0) no description available & (at3g14470 : 245.0) NB-ARC domain-containing disease resistance protein; FUNCTIONS IN: protein binding; INVOLVED IN: apoptosis, defense response; LOCATED IN: endomembrane system; EXPRESSED IN: 23 plant structures; EXPRESSED DURING: 14 growth stages; CONTAINS InterPro DOMAIN/s: Leucine-rich repeat-containing protein (InterPro:IPR015766), NB-AR…
'20.1.7'	'stress.biotic.PR-proteins'	HORVU2Hr1G103460,12	6.18452	1.04145804368661e-14	'(loc_os04g53160.1 : 1233.0) no description available & (at3g14470 : 255.0) NB-ARC domain-containing disease resistance protein; FUNCTIONS IN: protein binding; INVOLVED IN: apoptosis, defense response; LOCATED IN: endomembrane system; EXPRESSED IN: 23 plant structures; EXPRESSED DURING: 14 growth stages; CONTAINS InterPro DOMAIN/s: Leucine-rich repeat-containing protein (InterPro:IPR015766), NB-A…
'20.1.7'	'stress.biotic.PR-proteins'	HORVU5Hr1G006710,4	4.61975	1.7608965808464e-07	'(loc_os08g43050.1 : 1071.0) no description available & (at3g14470 : 369.0) NB-ARC domain-containing disease resistance protein; FUNCTIONS IN: protein binding; INVOLVED IN: apoptosis, defense response; LOCATED IN: endomembrane system; EXPRESSED IN: 23 plant structures; EXPRESSED DURING: 14 growth stages; CONTAINS InterPro DOMAIN/s: Leucine-rich repeat-containing protein (InterPro:IPR015766), NB-A…
'20.1.7'	'stress.biotic.PR-proteins'	HORVU5Hr1G078100,12	3.79105	4.33875034707318e-05	'(loc_os06g16790.1 : 523.0) no description available & (at3g14460 : 190.0) LRR and NB-ARC domains-containing disease resistance protein; FUNCTIONS IN: ATP binding; INVOLVED IN: apoptosis, defense response; CONTAINS InterPro DOMAIN/s: NB-ARC (InterPro:IPR002182), Leucine-rich repeat (InterPro:IPR001611), Disease resistance protein (InterPro:IPR000767); BEST Arabidopsis thaliana protein match is: N…
'20.1.7'	'stress.biotic.PR-proteins'	HORVU5Hr1G106370,1	3.77463	4.44923435272878e-05	'(loc_os02g17400.1 : 714.0) no description available & (at2g34930 : 477.0) disease resistance family protein / LRR family protein; INVOLVED IN: signal transduction, defense response to fungus, defense response; LOCATED IN: cell wall; EXPRESSED IN: 10 plant structures; EXPRESSED DURING: 7 growth stages; CONTAINS InterPro DOMAIN/s: Leucine-rich repeat-containing N-terminal domain, type 2 (InterPro:…
'20.1.7.6.1'	'stress.biotic.PR-proteins.proteinase inhibitors.trypsin inhibitor'	HORVU5Hr1G013290,10	3.52796	0.00013004257455182	'(loc_os03g29350.1 : 573.0) no description available & (at1g19110 : 360.0) inter-alpha-trypsin inhibitor heavy chain-related; FUNCTIONS IN: molecular_function unknown; INVOLVED IN: biological_process unknown; LOCATED IN: plasma membrane, membrane; EXPRESSED IN: 24 plant structures; EXPRESSED DURING: 15 growth stages; CONTAINS InterPro DOMAIN/s: von Willebrand factor, type A (InterPro:IPR002035); …
'20.2.1'	'stress.abiotic.heat'	HORVU7Hr1G117000,9	4.7202	1.22728192584931e-07	'(p36183|enpl_horvu : 929.0) Endoplasmin homolog precursor (GRP94 homolog) - Hordeum vulgare (Barley) & (loc_os06g50300.1 : 872.0) no description available & (at4g24190 : 785.0) encodes an ortholog of GRP94, an ER-resident HSP90-like protein and is involved in regulation of meristem size and organization. Single and double mutant analyses suggest that SHD may be required for the correct folding a…
'20.2.3'	'stress.abiotic.drought/salt'	HORVU1Hr1G057630,2	6.07823	1.93027448971269e-12	'(loc_os07g05570.1 : 939.0) no description available & (at1g30360 : 643.0) early-responsive to dehydration 4 (ERD4); INVOLVED IN: response to water deprivation; LOCATED IN: plasma membrane, chloroplast, vacuole, membrane, chloroplast envelope; EXPRESSED IN: 26 plant structures; EXPRESSED DURING: 14 growth stages; CONTAINS InterPro DOMAIN/s: Protein of unknown function DUF221 (InterPro:IPR003864);…
'20.2.5'	'stress.abiotic.light'	HORVU7Hr1G095570,5	3.55101	0.000113674427444117	'(loc_os04g57640.2 : 795.0) no description available & (at1g32230 : 178.0) Encodes a protein belonging to the (ADP-ribosyl)transferase domain-containing subfamily of WWE protein-protein interaction domain protein family. Superoxide radicals are necessary and sufficient to propagate cell death or lesion formation in rcd1 mutants. Without stress treatment, RCD1 is localized in the nucleus. Under hi…
'20.2.99'	'stress.abiotic.unspecified'	HORVU2Hr1G104220,1	2.88314	0.000163184929295549	'(loc_os04g52720.1 : 313.0) no description available & (at5g39160 : 230.0) RmlC-like cupins superfamily protein; FUNCTIONS IN: manganese ion binding, nutrient reservoir activity; INVOLVED IN: biological_process unknown; LOCATED IN: endomembrane system, apoplast; CONTAINS InterPro DOMAIN/s: Cupin, RmlC-type (InterPro:IPR011051), Cupin 1 (InterPro:IPR006045), Germin (InterPro:IPR001929), RmlC-like …
'22.1.3'	'polyamine metabolism.synthesis.arginine decarboxylase'	HORVU1Hr1G002090,21	6.05595	1.51216055293595e-12	'(p22220|spe1_avesa : 478.0) Arginine decarboxylase (EC 4.1.1.19) (ARGDC) (ADC) - Avena sativa (Oat) & (loc_os04g01690.3 : 470.0) no description available & (at2g16500 : 236.0) encodes a arginine decarboxylase (ADC), a rate-limiting enzyme that catalyzes the first step of polyamine (PA) biosynthesis via ADC pathway in Arabidopsis thaliana. Arabidopsis genome has two ADC paralogs, ADC1 and ADC2. D…
'25'	'C1-metabolism'	HORVU6Hr1G019540,8	4.03291	7.03770551137768e-06	'(loc_os02g04660.1 : 816.0) no description available & (at4g31120 : 584.0) Involved in vernalization. Required for epigenetic silencing of FLC, and for vernalization-mediated histone modification.; PROTEIN ARGININE METHYLTRANSFERASE 5 (PRMT5); FUNCTIONS IN: protein methyltransferase activity; INVOLVED IN: positive regulation of vernalization response, regulation of flower development; LOCATED IN:…
'26.1'	'misc.misc2'	HORVU5Hr1G115720,17	2.84879	1.98992047698953e-06	'(loc_os03g61360.1 : 417.0) no description available & (at4g02340 : 263.0) alpha/beta-Hydrolases superfamily protein; FUNCTIONS IN: epoxide hydrolase activity, catalytic activity; LOCATED IN: peroxisome; EXPRESSED IN: 22 plant structures; EXPRESSED DURING: 13 growth stages; CONTAINS InterPro DOMAIN/s: Epoxide hydrolase-like (InterPro:IPR000639), Alpha/beta hydrolase fold-1 (InterPro:IPR000073); B…
'26.10'	'misc.cytochrome P450'	HORVU2Hr1G027480,2	2.54174	0.000164359594864653	'(loc_os07g23570.1 : 795.0) no description available & (at2g46950 : 498.0) member of CYP709B; "cytochrome P450, family 709, subfamily B, polypeptide 2" (CYP709B2); FUNCTIONS IN: electron carrier activity, monooxygenase activity, iron ion binding, oxygen binding, heme binding; INVOLVED IN: oxidation reduction; LOCATED IN: endomembrane system; EXPRESSED IN: 14 plant structures; EXPRESSED DURING: 4 …
'26.10'	'misc.cytochrome P450'	HORVU2Hr1G094630,3	6.05645	4.206939329494e-14	'(loc_os04g48460.1 : 776.0) no description available & (at2g45510 : 476.0) member of CYP704A; "cytochrome P450, family 704, subfamily A, polypeptide 2" (CYP704A2); FUNCTIONS IN: electron carrier activity, monooxygenase activity, iron ion binding, oxygen binding, heme binding; INVOLVED IN: oxidation reduction; LOCATED IN: endoplasmic reticulum; EXPRESSED IN: callus; CONTAINS InterPro DOMAIN/s: Cyt…
'26.10'	'misc.cytochrome P450'	HORVU2Hr1G112070,4	2.0518	0.000218508895043206	'(loc_os01g43700.2 : 627.0) no description available & (at3g14690 : 431.0) putative cytochrome P450; "cytochrome P450, family 72, subfamily A, polypeptide 15" (CYP72A15); FUNCTIONS IN: electron carrier activity, monooxygenase activity, iron ion binding, oxygen binding, heme binding; INVOLVED IN: response to cyclopentenone; LOCATED IN: endomembrane system; EXPRESSED IN: 22 plant structures; EXPRES…
'26.10'	'misc.cytochrome P450'	HORVU5Hr1G016210,4	3.68699	1.50614011563781e-05	'(loc_os02g01890.1 : 325.0) no description available & (at1g64900 : 189.0) Encodes cytochrome P450 (CYP89A2).; "cytochrome P450, family 89, subfamily A, polypeptide 2" (CYP89A2); FUNCTIONS IN: electron carrier activity, monooxygenase activity, iron ion binding, oxygen binding, heme binding; INVOLVED IN: oxidation reduction; EXPRESSED IN: 20 plant structures; EXPRESSED DURING: 13 growth stages; CO…
'26.10'	'misc.cytochrome P450'	HORVU6Hr1G088960,3	3.98873	1.20100195475148e-05	'(loc_os01g43750.1 : 613.0) no description available & (at3g14690 : 424.0) putative cytochrome P450; "cytochrome P450, family 72, subfamily A, polypeptide 15" (CYP72A15); FUNCTIONS IN: electron carrier activity, monooxygenase activity, iron ion binding, oxygen binding, heme binding; INVOLVED IN: response to cyclopentenone; LOCATED IN: endomembrane system; EXPRESSED IN: 22 plant structures; EXPRES…
'26.10'	'misc.cytochrome P450'	HORVU7Hr1G019380,3	3.72594	6.66014167798329e-05	'(loc_os12g32850.1 : 648.0) no description available & (o48958|c71e1_sorbi : 495.0) Cytochrome P450 71E1 (EC 1.14.13.68) (4-hydroxyphenylacetaldehyde oxime monooxygenase) - Sorghum bicolor (Sorghum) (Sorghum vulgare) & (at3g26300 : 338.0) putative cytochrome P450; "cytochrome P450, family 71, subfamily B, polypeptide 34" (CYP71B34); FUNCTIONS IN: electron carrier activity, monooxygenase activity,…
'26.13'	'misc.acid and other phosphatases'	HORVU3Hr1G076320,50	3.39964	0.000281565837702687	'(loc_os01g56980.1 : 1564.0) no description available & (at3g01310 : 1373.0) Phosphoglycerate mutase-like family protein; FUNCTIONS IN: oxidoreductase activity, transition metal ion binding, acid phosphatase activity; INVOLVED IN: oxidation reduction; LOCATED IN: plasma membrane; EXPRESSED IN: 24 plant structures; EXPRESSED DURING: 13 growth stages; CONTAINS InterPro DOMAIN/s: ATP-grasp fold, Rim…
'26.13'	'misc.acid and other phosphatases'	HORVU6Hr1G066850,1	5.00753	5.06128109015316e-09	'(loc_os02g46490.1 : 532.0) no description available & (at2g35350 : 332.0) Encodes a protein most similar to the POLTERGEIST locus. Double mutant analysis of loss of function alleles indicate PLL1 functions redundantly with POL to regulate meristem size and pedicel length. Acts in a dose dependent manner with POL to suppress the clv1, clv2 and clv3 phenotypes.; poltergeist like 1 (PLL1); FUNCTION…
'26.2'	'misc.UDP glucosyl and glucoronyl transferases'	HORVU5Hr1G067750,16	2.45946	1.85179520144865e-07	'(loc_os09g27950.1 : 427.0) no description available & (at1g77810 : 382.0) Galactosyltransferase family protein; FUNCTIONS IN: transferase activity, transferring glycosyl groups, beta-1,3-galactosyltransferase activity; INVOLVED IN: protein amino acid glycosylation; LOCATED IN: Golgi apparatus; EXPRESSED IN: 20 plant structures; EXPRESSED DURING: 13 growth stages; CONTAINS InterPro DOMAIN/s: Glyc…
'26.22'	'misc.short chain dehydrogenase/reductase (SDR)'	HORVU1Hr1G053190,40	4.13892	4.65137309382136e-06	'(loc_os10g40030.8 : 400.0) no description available & (at4g11410 : 311.0) NAD(P)-binding Rossmann-fold superfamily protein; FUNCTIONS IN: oxidoreductase activity, binding, catalytic activity; INVOLVED IN: oxidation reduction, metabolic process; EXPRESSED IN: 22 plant structures; EXPRESSED DURING: 13 growth stages; CONTAINS InterPro DOMAIN/s: NAD(P)-binding domain (InterPro:IPR016040), Glucose/ri…
'26.22'	'misc.short chain dehydrogenase/reductase (SDR)'	HORVU4Hr1G000100,17	4.92105	2.95736701445393e-08	'(loc_os09g39670.1 : 265.0) no description available & (at4g11410 : 217.0) NAD(P)-binding Rossmann-fold superfamily protein; FUNCTIONS IN: oxidoreductase activity, binding, catalytic activity; INVOLVED IN: oxidation reduction, metabolic process; EXPRESSED IN: 22 plant structures; EXPRESSED DURING: 13 growth stages; CONTAINS InterPro DOMAIN/s: NAD(P)-binding domain (InterPro:IPR016040), Glucose/ri…
'26.22'	'misc.short chain dehydrogenase/reductase (SDR)'	HORVU4Hr1G000100,18	4.92105	2.95736701445393e-08	'(loc_os09g39670.1 : 265.0) no description available & (at4g11410 : 217.0) NAD(P)-binding Rossmann-fold superfamily protein; FUNCTIONS IN: oxidoreductase activity, binding, catalytic activity; INVOLVED IN: oxidation reduction, metabolic process; EXPRESSED IN: 22 plant structures; EXPRESSED DURING: 13 growth stages; CONTAINS InterPro DOMAIN/s: NAD(P)-binding domain (InterPro:IPR016040), Glucose/ri…
'26.28'	'misc.GDSL-motif lipase'	HORVU4Hr1G083820,2	2.5656	0.000185420113657105	'(loc_os06g50940.1 : 139.0) no description available & (at5g55050 : 91.7) GDSL-like Lipase/Acylhydrolase superfamily protein; FUNCTIONS IN: hydrolase activity, acting on ester bonds, lipase activity, carboxylesterase activity; INVOLVED IN: lipid metabolic process; LOCATED IN: endomembrane system; EXPRESSED IN: 17 plant structures; EXPRESSED DURING: 10 growth stages; CONTAINS InterPro DOMAIN/s: Li…
'26.28'	'misc.GDSL-motif lipase'	HORVU7Hr1G118940,2	2.32241	7.15316760961701e-05	'(loc_os06g50940.1 : 422.0) no description available & (at1g74460 : 166.0) GDSL-like Lipase/Acylhydrolase superfamily protein; FUNCTIONS IN: hydrolase activity, acting on ester bonds, carboxylesterase activity; INVOLVED IN: lipid metabolic process; LOCATED IN: endomembrane system; EXPRESSED IN: shoot, hypocotyl, root, flower, carpel; EXPRESSED DURING: petal differentiation and expansion stage; CO…
'26.3'	'misc.gluco-, galacto- and mannosidases'	HORVU1Hr1G001750,2	5.50155	6.17251095753219e-11	'(loc_os05g01540.2 : 152.0) no description available & (at1g16610 : 122.0) Encodes SR45, a member of the highly conserved family of serine/arginine-rich (SR) proteins, which play key roles in pre-mRNA splicing and other aspects of RNA metabolism. SR45 is a spliceosome protein, interacts with SR33 and the U1-70K protein of the U1 snRNP. Also involved in plant sugar response. sr45-1 mutation confer…
'26.31'	'misc.zinc finger'	HORVU2Hr1G096240,1	4.5746	1.64859683800295e-07	'(loc_os04g47410.5 : 436.0) no description available & (at3g51390 : 258.0) DHHC-type zinc finger family protein; FUNCTIONS IN: zinc ion binding; INVOLVED IN: biological_process unknown; LOCATED IN: plasma membrane; EXPRESSED IN: 25 plant structures; EXPRESSED DURING: 15 growth stages; CONTAINS InterPro DOMAIN/s: Zinc finger, DHHC-type (InterPro:IPR001594); BEST Arabidopsis thaliana protein match …
'26.4.1'	'misc.beta 1,3 glucan hydrolases.glucan endo-1,3-beta-glucosidase'	HORVU3Hr1G105600,1	3.333	9.00182436142536e-06	'(p15737|e13b_horvu : 500.0) Glucan endo-1,3-beta-glucosidase GII precursor (EC 3.2.1.39) ((1->3)-beta-glucan endohydrolase GII) ((1->3)-beta-glucanase isoenzyme GII) (Beta-1,3-endoglucanase GII) - Hordeum vulgare (Barley) & (loc_os01g71670.1 : 451.0) no description available & (at4g16260 : 251.0) Glycosyl hydrolase superfamily protein; FUNCTIONS IN: cation binding, hydrolase activity, hydrolyzin…
'26.7'	'misc.oxidases - copper, flavone etc'	HORVU6Hr1G092910,14	6.6118	1.30230783845613e-16	'(loc_os10g38850.1 : 2083.0) no description available & (at4g16310 : 1135.0) LSD1-like 3 (LDL3); FUNCTIONS IN: primary amine oxidase activity; EXPRESSED IN: cultured cell; CONTAINS InterPro DOMAIN/s: Amine oxidase (InterPro:IPR002937), Adrenodoxin reductase (InterPro:IPR000759), SWIRM (InterPro:IPR007526); BEST Arabidopsis thaliana protein match is: Flavin containing amine oxidoreductase family p…
'26.9'	'misc.glutathione S transferases'	HORVU1Hr1G001560,2	3.63768	5.35930962677219e-08	'(loc_os10g38610.1 : 177.0) no description available & (q06398|gstu6_orysa : 147.0) Probable glutathione S-transferase GSTU6 (EC 2.5.1.18) (28 kDa cold-induced protein) - Oryza sativa (Rice) & (at1g10360 : 142.0) Encodes glutathione transferase belonging to the tau class of GSTs. Naming convention according to Wagner et al. (2002).; glutathione S-transferase TAU 18 (GSTU18); CONTAINS InterPro DOM…
'26.9'	'misc.glutathione S transferases'	HORVU1Hr1G049190,1	2.84442	3.01317334435921e-09	'(loc_os10g38495.1 : 285.0) no description available & (q06398|gstu6_orysa : 224.0) Probable glutathione S-transferase GSTU6 (EC 2.5.1.18) (28 kDa cold-induced protein) - Oryza sativa (Rice) & (at1g10360 : 196.0) Encodes glutathione transferase belonging to the tau class of GSTs. Naming convention according to Wagner et al. (2002).; glutathione S-transferase TAU 18 (GSTU18); CONTAINS InterPro DOM…
'26.9'	'misc.glutathione S transferases'	HORVU1Hr1G049270,2	3.32622	1.21601112177807e-07	'(loc_os10g38710.1 : 281.0) no description available & (q06398|gstu6_orysa : 221.0) Probable glutathione S-transferase GSTU6 (EC 2.5.1.18) (28 kDa cold-induced protein) - Oryza sativa (Rice) & (at1g10370 : 205.0) EARLY-RESPONSIVE TO DEHYDRATION 9 (ERD9); FUNCTIONS IN: glutathione transferase activity; INVOLVED IN: response to water deprivation, response to karrikin, toxin catabolic process; LOCAT…
'26.9'	'misc.glutathione S transferases'	HORVU1Hr1G049270,3	2.73019	2.01660115084144e-06	'(loc_os10g38710.1 : 281.0) no description available & (q06398|gstu6_orysa : 221.0) Probable glutathione S-transferase GSTU6 (EC 2.5.1.18) (28 kDa cold-induced protein) - Oryza sativa (Rice) & (at1g10370 : 205.0) EARLY-RESPONSIVE TO DEHYDRATION 9 (ERD9); FUNCTIONS IN: glutathione transferase activity; INVOLVED IN: response to water deprivation, response to karrikin, toxin catabolic process; LOCAT…
'26.9'	'misc.glutathione S transferases'	HORVU2Hr1G124300,2	4.21421	2.47883460622966e-06	'(loc_os07g05800.1 : 251.0) no description available & (q03666|gstx4_tobac : 202.0) Probable glutathione S-transferase (EC 2.5.1.18) (Auxin-induced protein PCNT107) - Nicotiana tabacum (Common tobacco) & (at1g78380 : 196.0) Encodes a glutathione transferase that is a member of Tau GST gene family. Expression is induced by drought stress, oxidative stress, and high doses of auxin and cytokinin. na…
'26.9'	'misc.glutathione S transferases'	HORVU2Hr1G124310,1	3.83081	5.28259977286679e-07	'(loc_os09g20220.1 : 288.0) no description available & (q03666|gstx4_tobac : 268.0) Probable glutathione S-transferase (EC 2.5.1.18) (Auxin-induced protein PCNT107) - Nicotiana tabacum (Common tobacco) & (at1g78370 : 263.0) Encodes glutathione transferase belonging to the tau class of GSTs. Naming convention according to Wagner et al. (2002).; glutathione S-transferase TAU 20 (GSTU20); FUNCTIONS …
'26.9'	'misc.glutathione S transferases'	HORVU3Hr1G117390,1	2.00641	6.52432789096404e-05	'(p30110|gstf1_wheat : 399.0) Glutathione S-transferase 1 (EC 2.5.1.18) (GST class-phi) - Triticum aestivum (Wheat) & (loc_os01g27260.1 : 294.0) no description available & (at3g62760 : 197.0) Encodes glutathione transferase belonging to the phi class of GSTs. Naming convention according to Wagner et al. (2002).; ATGSTF13; CONTAINS InterPro DOMAIN/s: Thioredoxin fold (InterPro:IPR012335), Glutathi…
'26.9'	'misc.glutathione S transferases'	HORVU4Hr1G057890,10	4.07759	7.99965986002016e-06	'(loc_os03g17470.1 : 422.0) no description available & (p49248|in21_maize : 301.0) IN2-1 protein - Zea mays (Maize) & (at5g02790 : 276.0) Glutathione transferase L3 (GSTL3); INVOLVED IN: response to cadmium ion; EXPRESSED IN: 24 plant structures; EXPRESSED DURING: 14 growth stages; CONTAINS InterPro DOMAIN/s: Thioredoxin fold (InterPro:IPR012335), Glutathione S-transferase, C-terminal (InterPro:I…
'26.9'	'misc.glutathione S transferases'	HORVU5Hr1G058000,3	5.08499	1.64623450614717e-09	'(at1g10360 : 124.0) Encodes glutathione transferase belonging to the tau class of GSTs. Naming convention according to Wagner et al. (2002).; glutathione S-transferase TAU 18 (GSTU18); CONTAINS InterPro DOMAIN/s: Thioredoxin fold (InterPro:IPR012335), Glutathione S-transferase, C-terminal (InterPro:IPR004046), Glutathione S-transferase, C-terminal-like (InterPro:IPR010987), Glutathione S-transfe…
'26.9'	'misc.glutathione S transferases'	HORVU5Hr1G085070,64	4.00572	1.08902012942674e-05	'(loc_os09g37240.2 : 514.0) no description available & (at3g03190 : 84.3) Encodes glutathione transferase belonging to the phi class of GSTs. Naming convention according to Wagner et al. (2002).; glutathione S-transferase F11 (GSTF11); CONTAINS InterPro DOMAIN/s: Thioredoxin fold (InterPro:IPR012335), Glutathione S-transferase, C-terminal (InterPro:IPR004046), Glutathione S-transferase, C-termina…
'26.9'	'misc.glutathione S transferases'	HORVU5Hr1G103420,1	2.60019	7.28974757159515e-05	'(o65032|gstu1_orysa : 309.0) Probable glutathione S-transferase GSTU1 (EC 2.5.1.18) - Oryza sativa (Rice) & (loc_os03g57200.1 : 309.0) no description available & (at1g17180 : 244.0) Encodes glutathione transferase belonging to the tau class of GSTs. Naming convention according to Wagner et al. (2002).; glutathione S-transferase TAU 25 (GSTU25); CONTAINS InterPro DOMAIN/s: Thioredoxin fold (Inter…
'27.1'	'RNA.processing'	HORVU3Hr1G094990,11	5.60316	8.47788122620154e-12	'(loc_os01g26160.2 : 417.0) no description available & (at3g05040 : 296.0) Encodes member of importin/exportin family. Involved in timing of shoot maturation. Involved in miRNA transport. Mutants flower early and have small, curled leaves and reduced abundance of certain miRNA species.; HASTY (HST); CONTAINS InterPro DOMAIN/s: Exportin-1/Importin-beta-like (InterPro:IPR013598), Armadillo-type fol…
'27.1.1'	'RNA.processing.splicing'	HORVU1Hr1G025660,14	4.08447	6.88788309104149e-06	'(loc_os05g08600.2 : 162.0) no description available & (at5g37370 : 131.0) encodes a putative splicing factor. Over-expression in yeast and Arabidopsis result in increased tolerance to high salt.; ATSRL1; FUNCTIONS IN: binding; INVOLVED IN: response to salt stress, RNA processing; LOCATED IN: cellular_component unknown; EXPRESSED IN: 24 plant structures; EXPRESSED DURING: 15 growth stages; CONTAI…
'27.1.1'	'RNA.processing.splicing'	HORVU1Hr1G087660,22	4.02333	1.06592543639665e-05	'(loc_os05g48960.3 : 380.0) no description available & (at5g42820 : 341.0) U2 auxiliary factor small subunit. The atU2AF35b protein and its homolog, atU2AF35a, contain most of the conserved domains of hsU2AF35, including the psiRRM, one RS domain, two zinc fingers, and the two regions for interacting with U2AF large subunit. Both proteins lack the stretch of glycines present in human U2AF35. The …
'27.1.1'	'RNA.processing.splicing'	HORVU3Hr1G064550,39	4.018	7.95668470925126e-06	'(loc_os05g30140.2 : 289.0) no description available & (at1g09140 : 258.0) Encodes a serine-arginine rich RNA binding protein involved in regulation of splicing (including splicing of itself). Exists as 3 alternative spliced forms that are differentially expressed.; SERINE-ARGININE PROTEIN 30 (ATSRP30); CONTAINS InterPro DOMAIN/s: RNA recognition motif, RNP-1 (InterPro:IPR000504), Nucleotide-bind…
'27.1.1'	'RNA.processing.splicing'	HORVU4Hr1G027820,11	4.43475	4.46626793219732e-07	'(loc_os11g47830.2 : 189.0) no description available & (at3g55460 : 134.0) encodes an SC35-like splicing factor that is localized to nuclear specks.; SC35-like splicing factor 30 (SCL30); FUNCTIONS IN: RNA binding, nucleotide binding, nucleic acid binding; INVOLVED IN: response to oxidative stress, nuclear mRNA splicing, via spliceosome, RNA splicing; LOCATED IN: nuclear speck; EXPRESSED IN: 24 p…
'27.1.19'	'RNA.processing.ribonucleases'	HORVU0Hr1G017230,1	4.86588	2.74336899576512e-08	'(loc_os08g33710.1 : 332.0) no description available & (at2g02990 : 263.0) member of the ribonuclease T2 family, responds to inorganic phosphate starvation, and inhibits production of anthocyanin. Also involved in wound-induced signaling independent of jasmonic acid.; ribonuclease 1 (RNS1); FUNCTIONS IN: ribonuclease activity, endoribonuclease activity; INVOLVED IN: cellular response to phosphate…
'27.1.19'	'RNA.processing.ribonucleases'	HORVU0Hr1G017230,3	3.39771	7.4808029000599e-10	'(loc_os08g33710.1 : 332.0) no description available & (at2g02990 : 263.0) member of the ribonuclease T2 family, responds to inorganic phosphate starvation, and inhibits production of anthocyanin. Also involved in wound-induced signaling independent of jasmonic acid.; ribonuclease 1 (RNS1); FUNCTIONS IN: ribonuclease activity, endoribonuclease activity; INVOLVED IN: cellular response to phosphate…
'27.1.19'	'RNA.processing.ribonucleases'	HORVU5Hr1G082940,9	5.73331	2.45002496665372e-12	'(loc_os02g28074.2 : 412.0) no description available & (at5g42540 : 330.0) Encodes a protein with similarity to yeast 5'-3'exonucleases and can functionally complement the yeast mutations. In Arabidopsis XRN2 acts as a suppressor of posttranscriptional gene silencing.; exoribonuclease 2 (XRN2); CONTAINS InterPro DOMAIN/s: 5'-3' exoribonuclease 2 (InterPro:IPR017151), Zinc finger, CCHC-type (Inter…
'27.1.19'	'RNA.processing.ribonucleases'	HORVU6Hr1G081930,1	3.83835	2.32689946457969e-16	'(loc_os08g33710.1 : 134.0) no description available & (at2g02990 : 95.1) member of the ribonuclease T2 family, responds to inorganic phosphate starvation, and inhibits production of anthocyanin. Also involved in wound-induced signaling independent of jasmonic acid.; ribonuclease 1 (RNS1); FUNCTIONS IN: ribonuclease activity, endoribonuclease activity; INVOLVED IN: cellular response to phosphate …
'27.1.19'	'RNA.processing.ribonucleases'	HORVU6Hr1G081950,1	2.0524	0.000106286817960534	'(loc_os08g33710.1 : 120.0) no description available & (at2g02990 : 100.0) member of the ribonuclease T2 family, responds to inorganic phosphate starvation, and inhibits production of anthocyanin. Also involved in wound-induced signaling independent of jasmonic acid.; ribonuclease 1 (RNS1); FUNCTIONS IN: ribonuclease activity, endoribonuclease activity; INVOLVED IN: cellular response to phosphate…
'27.1.19'	'RNA.processing.ribonucleases'	HORVU6Hr1G081950,2	3.89461	6.54810121235018e-12	'(loc_os08g33710.1 : 120.0) no description available & (at2g02990 : 100.0) member of the ribonuclease T2 family, responds to inorganic phosphate starvation, and inhibits production of anthocyanin. Also involved in wound-induced signaling independent of jasmonic acid.; ribonuclease 1 (RNS1); FUNCTIONS IN: ribonuclease activity, endoribonuclease activity; INVOLVED IN: cellular response to phosphate…
'27.1.19'	'RNA.processing.ribonucleases'	HORVU6Hr1G081950,4	3.43721	0.000201134987635615	'(loc_os08g33710.1 : 120.0) no description available & (at2g02990 : 100.0) member of the ribonuclease T2 family, responds to inorganic phosphate starvation, and inhibits production of anthocyanin. Also involved in wound-induced signaling independent of jasmonic acid.; ribonuclease 1 (RNS1); FUNCTIONS IN: ribonuclease activity, endoribonuclease activity; INVOLVED IN: cellular response to phosphate…
[truncated: 230 more rows]

## Sheet: C3-21 10d roots_downregulated
List of downregulated genes identified in 10-day-old roots of ckx3 mutant line C1-21. Functional annotation was performed using Mercator sequence annotation tool.
[truncated: 293 more rows]
