# Supplementary material for: Knockout of the HvCKX1 or HvCKX3 Gene in Barley (Hordeum vulgare L.) by RNA-Guided Cas9 Nuclease Affects the Regulation of Cytokinin Metabolism and Root Morphology
Source: Cells. 2019 Jul 26;8(8):782. doi: 10.3390/cells8080782 (PMC6721474; doi:10.3390/cells8080782)
Supplement: Supplementary file 1 [file cells-08-00782-s001.zip › Supplementary figures.pdf]

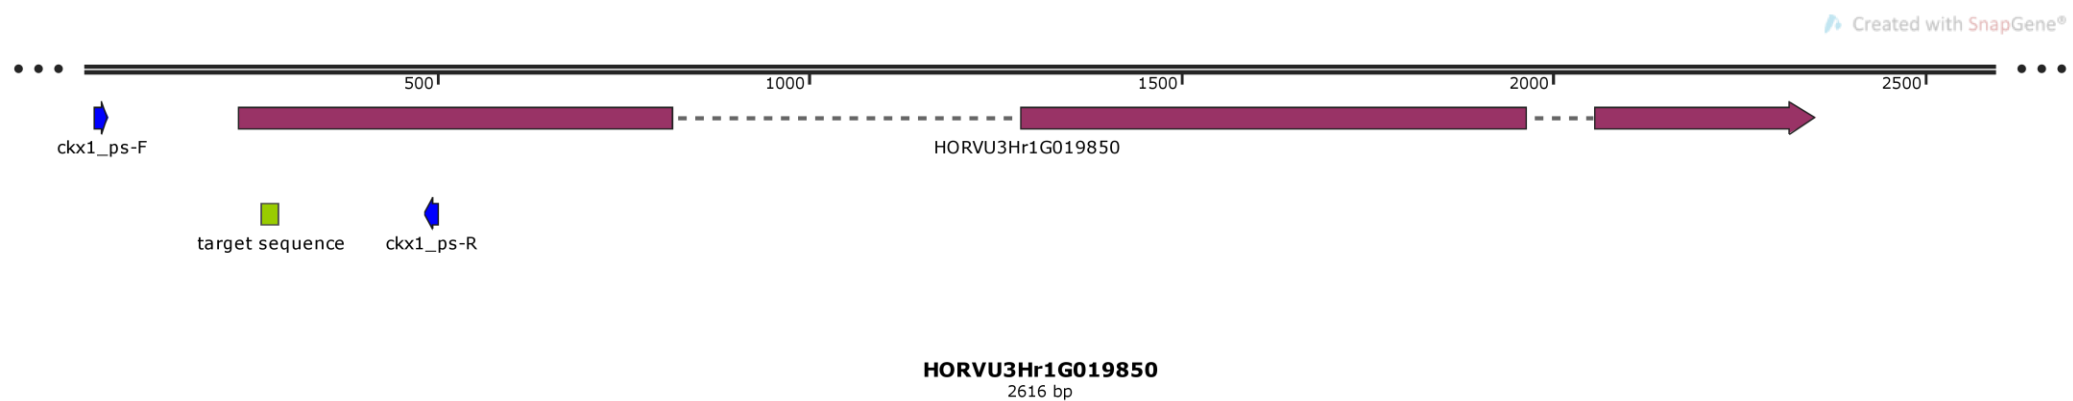

**Fig. S1** Schematic structure of *HvCKX1* gene and target sequence position. Purple bars represent exons; position of target sequence is marked by green bar; position of *ckx1-ps* primers are marked by dark blue arrows.

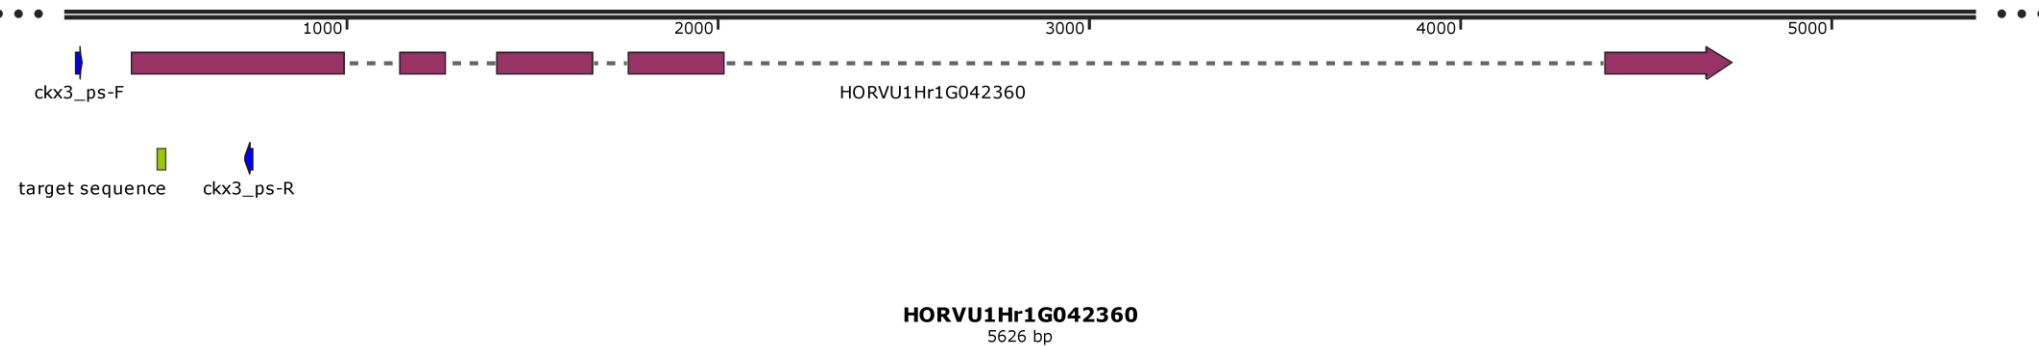

**Fig. S2** Schematic structure of *HvCKX3* gene and target sequence position. Purple bars represent exons; position of target sequence is marked by green bar; position of ckx1-ps primers are marked by dark blue arrows.

**Fig. S3**

A) IPT1

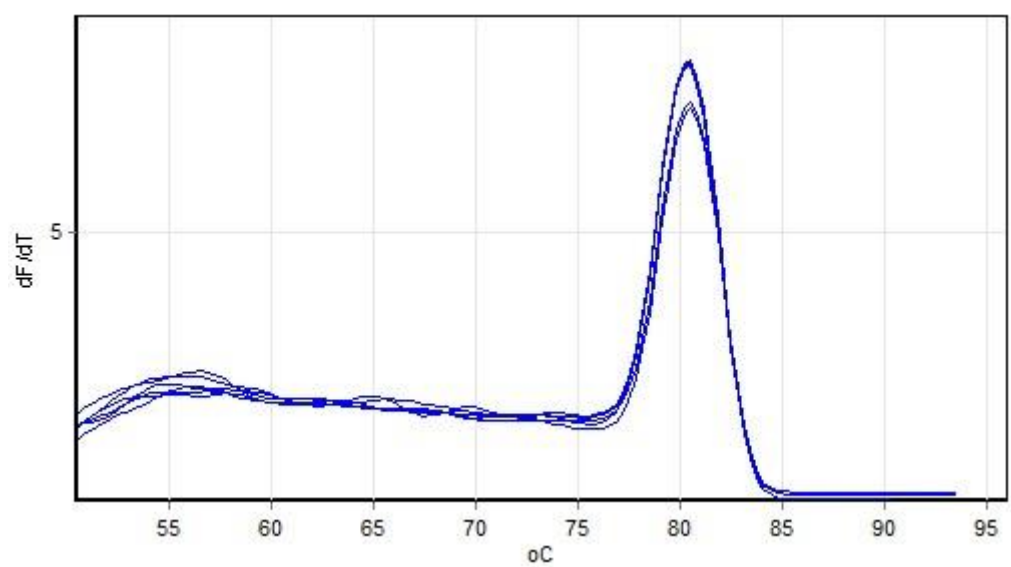

|                         |                                |
|-------------------------|--------------------------------|
| Reaction efficiency (*) | $1,0053 (* = 10^{(-1/m)} - 1)$ |
|-------------------------|--------------------------------|

B) IPT2

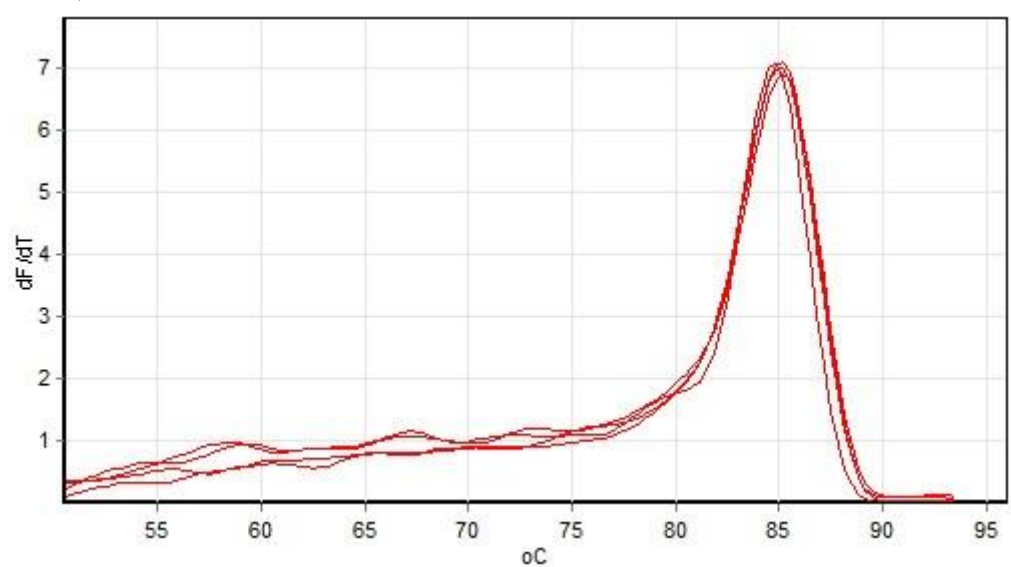

|                         |                                 |
|-------------------------|---------------------------------|
| Reaction efficiency (*) | $1,00773 (* = 10^{(-1/m)} - 1)$ |
|-------------------------|---------------------------------|

C) IPT3

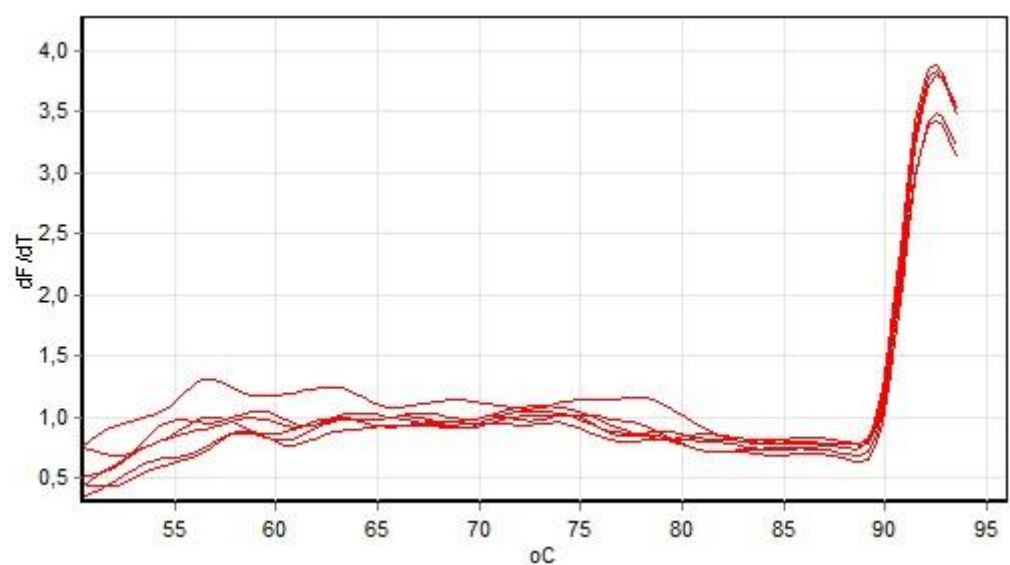

Reaction efficiency (\*)  $0,92709 (* = 10^{(-1/m)} - 1)$

D) IPT4

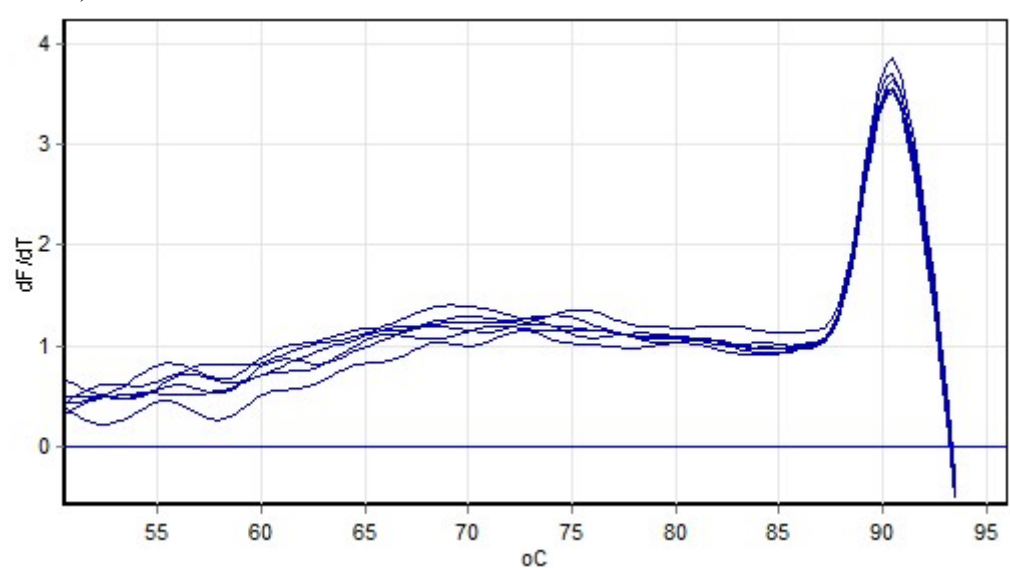

Reaction efficiency (\*)  $0,95254 (* = 10^{(-1/m)} - 1)$

E) IPT5

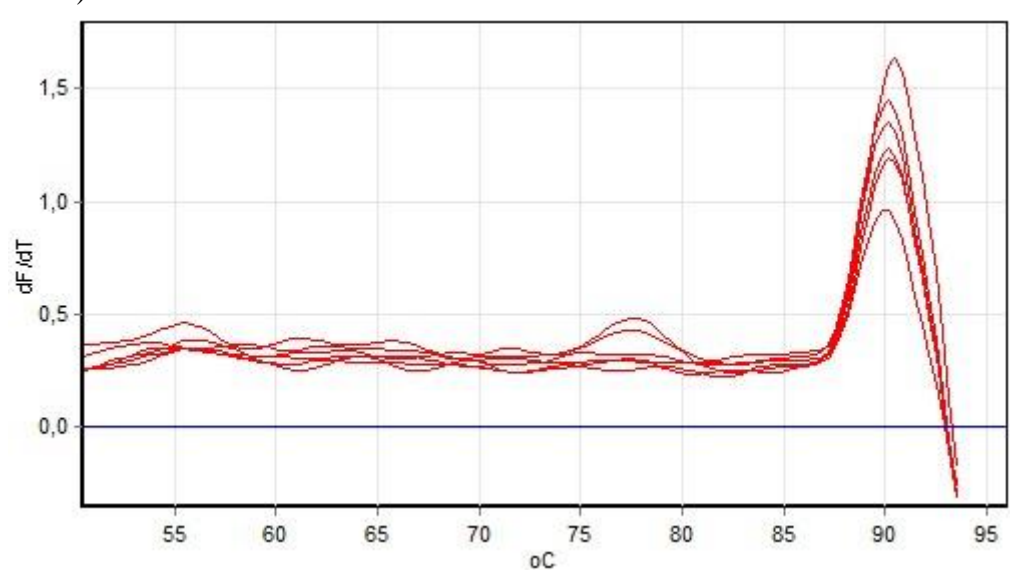

Reaction efficiency (\*)  $0,94357 (* = 10^{(-1/m)} - 1)$

F) IPT7

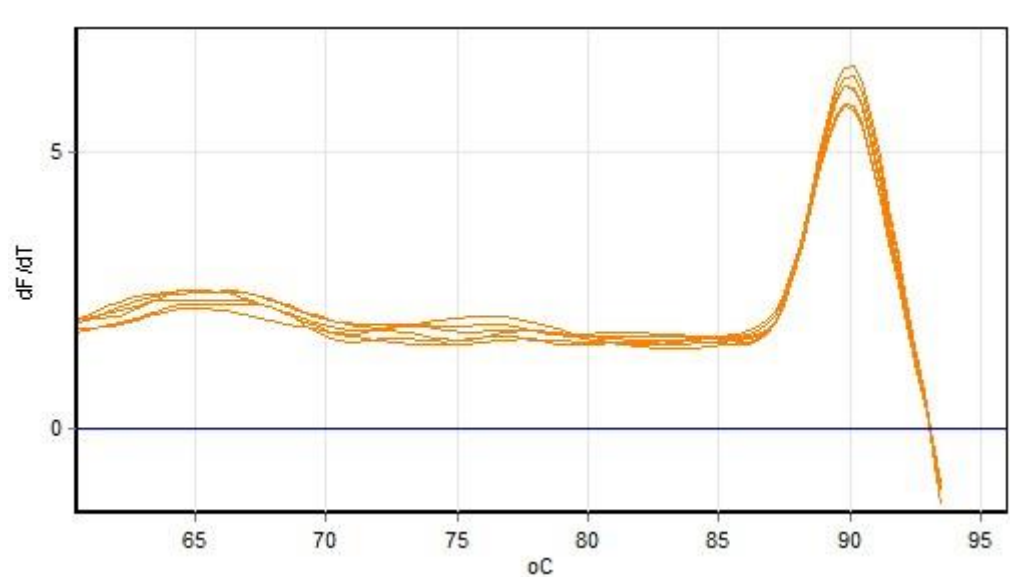

Reaction efficiency (\*)  $1,00093 (* = 10^{(-1/m)} - 1)$

G) IPT10

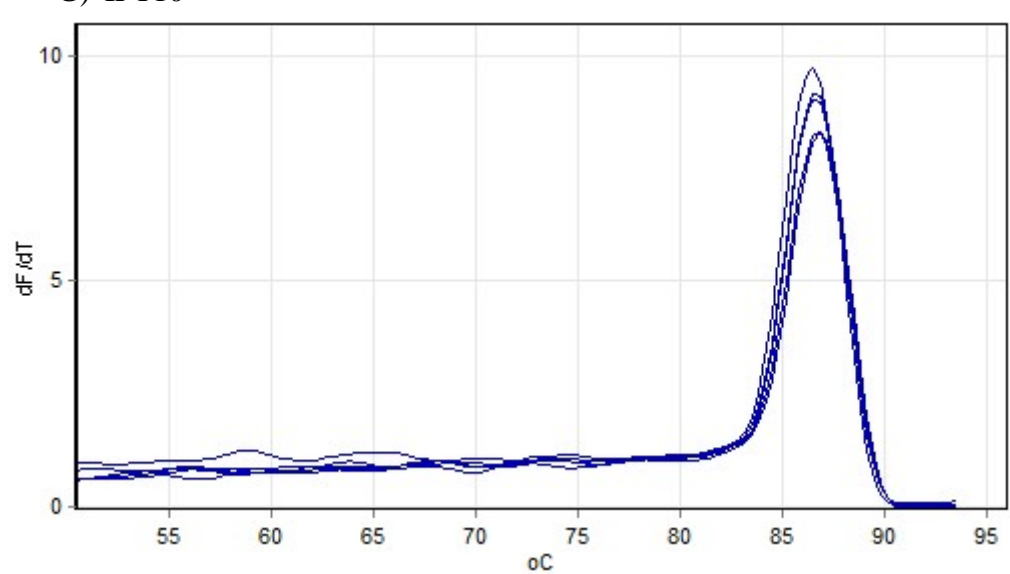

Reaction efficiency (\*)  $1,00448 (* = 10^{(-1/m)} - 1)$

H) CKX1

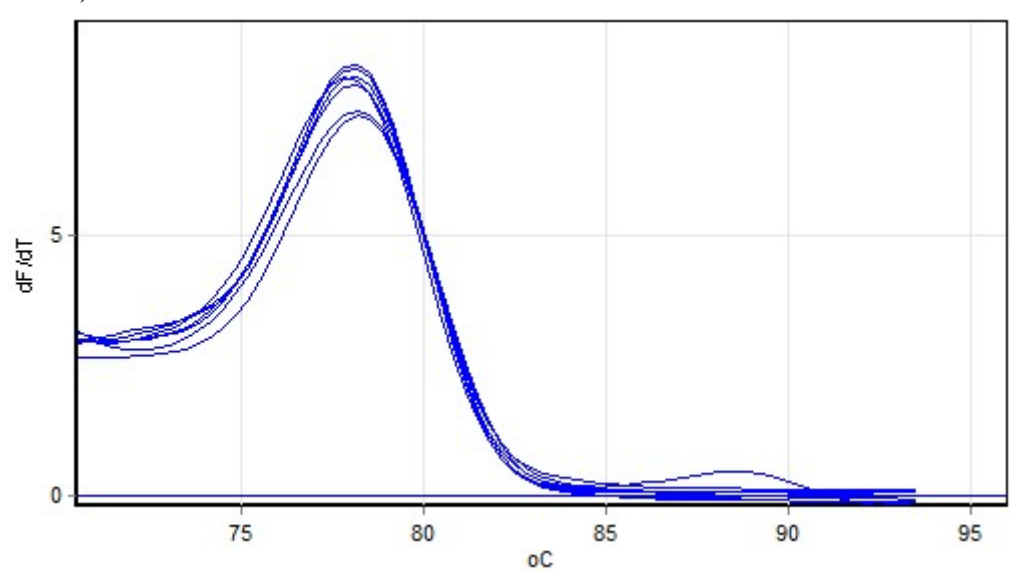

Reaction efficiency (\*)  $0,81026 (* = 10^{(-1/m)} - 1)$

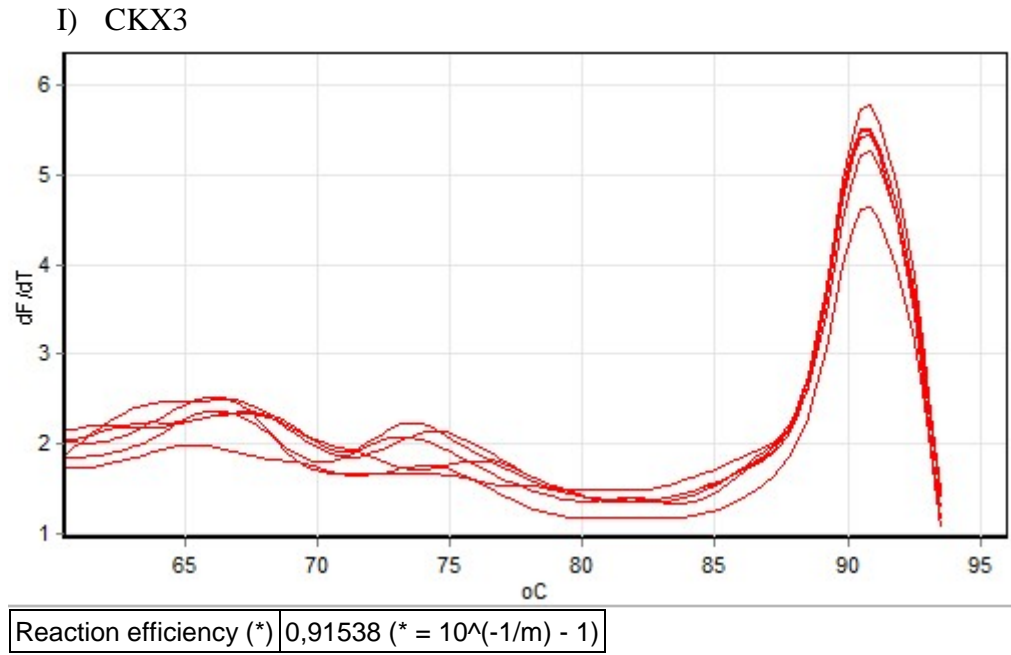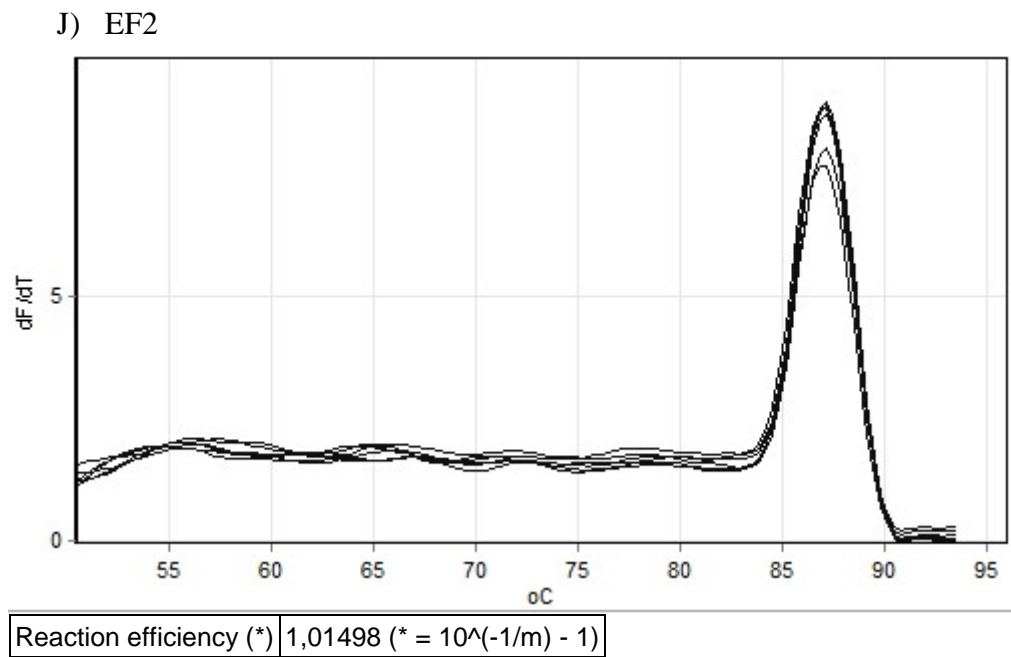

**Fig. S3** Melting curves and reaction efficiencies for primer pairs of *HvIPT* (A-G), *HvCKX1* (H), *HvCKX3* (I) and *EF2* (J) genes. The reaction efficiencies were calculated based on series of standards dilutions of each gene.
