# Supplementary material for: Knockout of the HvCKX1 or HvCKX3 Gene in Barley (Hordeum vulgare L.) by RNA-Guided Cas9 Nuclease Affects the Regulation of Cytokinin Metabolism and Root Morphology
Source: Cells. 2019 Jul 26;8(8):782. doi: 10.3390/cells8080782 (PMC6721474; doi:10.3390/cells8080782)
Supplement: Supplementary file 1 [file cells-08-00782-s001.zip › Supplementary tables.pdf]

**Table S1** List of PCR primers used in this study

| Gene                         | Primer forward          | Primer reverse         | Annealing temp.<br>(°C) |
|------------------------------|-------------------------|------------------------|-------------------------|
| <i>HvCKX1</i>                | CGTACACCATCTCGTTCC      | GTCGATCCACATCTGCTC     | 60                      |
| <i>HvCKX3</i>                | CCAAGGGACATCTCTCTG      | CTGTGCAGCTCTATCTCA     | 60                      |
| <i>HvIPT1</i>                | GTTCCAGATTTGACTGTTG     | CGACTCTTTCATTGACATAA   | 60                      |
| <i>HvIPT2</i>                | CAGGAGCTATGGAGGAAG      | CTTCCCACAGCTCTTCTC     | 60                      |
| <i>HvIPT3</i>                | GTGTGGAAATGGAAAGGA      | GTGGTAAAGCTGGATCTTG    | 61                      |
| <i>HvIPT4</i>                | GAGGTGGATGAGGCTATG      | GATCCTTCATTCTCATGCTC   | 61                      |
| <i>HvIPT5</i>                | CGAGGTGTTCTGAAGAG       | GACCATGCTGCATTCTTG     | 60                      |
| <i>HvIPT7</i>                | CAAGGTGGTTATTGTGATGG    | GTGGACCTGGATCTTGTC     | 61                      |
| <i>HvIPT10</i>               | CCTTCACCTTACCATACA      | GGAAGTCATAATCCAGTTC    | 60                      |
| <i>Hv_EF2</i>                | ATGGCAACATATGAAGATG     | GGTCAAAGAAGTTCTCAC     | 60                      |
| <i>hpt</i>                   | ATGACGCACAATCCCACTATCCT | AGTTCGGTTTCAGGCAGGTCTT | 68                      |
| ckx1-ps<br>(target sequence) | CAGCTTTCACCGTAGCAGCA    | AACGAGATGGTGTACGGCCA   | 66.5                    |
| ckx3-ps<br>(target sequence) | TCTCTCTCTCGCCCTTTGCT    | CATCTCCACCACAATGCCAT   | 67                      |

**Table S2** List of potential off-target sites in the barley genome searched for the target sequence located in the *HvCKX1* gene. Mm. type – type of the mismatches, Mm. all – number of all mismatches

| # Location                  | Site                       | Mm.Type | PAM   | Mm.All | Exon_info                       | Function                |
|-----------------------------|----------------------------|---------|-------|--------|---------------------------------|-------------------------|
| chr3H:58407963-58407986:+   | GATCACCG_CGGCGTCTCCTA-CGGC | A00     | A:NGG | 0      | on target<br>(HORVU3Hr1G019850) | HvCKX1                  |
| chr4H:423905800-423905823:- | GACtCCt_CGGCGTCTCCTA-CGGG  | A03     | A:NGG | 3      | (HORVU4Hr1G051610)              | Uncharacterized protein |
| chr1H:547771679-547771702:+ | GtcCACCG_CGGCGTCTaCgA-CGGC | A22     | A:NGG | 4      | (HORVU1Hr1G091230)              |                         |
| chr3H:431184160-431184183:- | GtcCACCG_CGGCGTCTaCgA-CGGC | A22     | A:NGG | 4      | (HORVU3Hr1G057440)              |                         |
| chr3H:491895515-491895538:+ | GATCtCCt_CGGCGTCagCTA-CGGA | A22     | A:NGG | 4      | (HORVU3Hr1G064470)              |                         |
| chr5H:598325234-598325257:- | GccaACTG_CGGCGTCTCCTA-CGGC | A04     | A:NGG | 4      | (HORVU5Hr1G095440)              |                         |
| chr7H:649319954-649319977:- | cAaCACCG_CGGaGTCTgCTA-CGGA | A22     | A:NGG | 4      | (HORVU7Hr1G119190)              |                         |
| chrUn:77796041-77796064:+   | GccaACTG_CGGCGTCTCCTA-CGGC | A04     | A:NGG | 4      | (HORVU0Hr1G013800)              |                         |

**Table S3** List of potential off-target sites in the barley genome searched for the target sequence located in the *HvCKX3* gene. Mm. type – type of the mismatches, Mm. all – number of all mismatches

| # Location                  | Site                       | Mm.Type | PAM   | Mm.All | Exon_info                       | Function |
|-----------------------------|----------------------------|---------|-------|--------|---------------------------------|----------|
| chr1H:306445088-306445111:+ | CAAGTTCA_TCCAGAGCCCCA-TGGA | A00     | A:NGG | 0      | on target<br>(HORVU1Hr1G042360) | HvCKX3   |
| chr3H:650676876-650676899:+ | CAAGgTCt_aCCAGAGCCCCg-AGGT | A22     | A:NGG | 4      | (HORVU3Hr1G095710)              |          |
| chr3H:657359954-657359977:+ | CAtGcTCA_cCaAGAGCCCCA-AGGC | A22     | A:NGG | 4      | (HORVU3Hr1G097950)              |          |
| chr4H:31161598-31161621:-   | CgAGaTCA_TCCAcAaCCCCA-CGGT | A22     | A:NGG | 4      | (HORVU4Hr1G010410)              |          |
| chr5H:551830063-551830086:- | tAAGTgCA_TcTAGtGCCCCA-CGGT | A22     | A:NGG | 4      | (HORVU5Hr1G076710)              |          |
| chr5H:624911182-624911205:+ | CAtGgTCA_TCCAcAGCCaCA-GGGC | A22     | A:NGG | 4      | (HORVU5Hr1G106720)              |          |
| chr5H:651947828-651947851:- | CgAGcTCA_TCCAGAGCCtCc-AGGT | A22     | A:NGG | 4      | (HORVU5Hr1G118080)              |          |
| chrUn:84614824-84614847:-   | CcAGcTCt_TCCAGAGCCaCA-AGGA | A13     | A:NGG | 4      | (HORVU0Hr1G015650)              |          |

**Table S4** Enzymatic CKX activity in 7 DAP spikes and 10-day-old roots of cks1 mutant lines.

|             | <b>Spike at 7DAP</b>      |           | <b>10-day-old roots</b>   |           |
|-------------|---------------------------|-----------|---------------------------|-----------|
| <b>Line</b> | <b>Activity [pKat/mg]</b> | <b>SD</b> | <b>Activity [pKat/mg]</b> | <b>SD</b> |
| CT          | 6,49                      | 1,48      | 7,64                      | 2,61      |
| C1-22       | 0,40                      | 0,19      | 1,17                      | 0,10      |
| C1-27       | 1,11                      | 1,48      | 1,88                      | 1,00      |
| C1-29       | 0,54                      | 0,30      | 0,68                      | 0,06      |
| C1-34       | 0,53                      | 0,14      | 0,65                      | 0,46      |

CT – control plants; SD – standard deviation; values are mean  $\pm$  SD (n = 3 to 8)

**Table S5** Enzymatic CKX activity in 7 DAP spikes and 10-day-old roots of cks3 mutant lines.

|             | <b>Spike at 7DAP</b>      |           | <b>10-day-old roots</b>   |           |
|-------------|---------------------------|-----------|---------------------------|-----------|
| <b>Line</b> | <b>Activity [pKat/mg]</b> | <b>SD</b> | <b>Activity [pKat/mg]</b> | <b>SD</b> |
| CT          | 16,94                     | 3,15      | 5,50                      | 1,67      |
| C3-10       | 12,14                     | 0,35      | 11,10                     | 2,02      |
| C3-21       | 14,62                     | 2,60      | 13,47                     | 1,91      |
| C3-22       | 20,53                     | 4,71      | 7,52                      | 0,02      |
| C3-26       | 17,57                     | 3,07      | 11,66                     | 9,43      |

CT – control plants; SD – standard deviation; values are mean  $\pm$  SD (n = 3 to 6)

**Table S6** Expression level of wild-type *HvCKX3* in *ckx1* mutant lines.

| Line  | Spikes at 7DAP |       | 10-day-old roots |       |
|-------|----------------|-------|------------------|-------|
|       | Expression     | SD    | Expression       | SD    |
| CT    | 0,298          | 0,043 | 0,193            | 0,089 |
| C1-22 | 0,413          | 0,063 | 0,330            | 0,178 |
| C1-27 | 0,487          | 0,179 | 0,318            | 0,080 |
| C1-29 | 0,292          | 0,021 | 0,336            | 0,102 |
| C1-34 | 0,399          | 0,198 | 0,241            | 0,018 |

CT – control plants; SD – standard deviation; values are mean  $\pm$  SD (n = 3); Expression values were normalized in relation to *Elongation factor 2* reference gene (AK250137.1).

**Table S7** Expression level of wild-type *HvCKX1* in *ckx3* mutant lines.

| Line  | Spikes at 7DAP |       | 10-day-old roots |       |
|-------|----------------|-------|------------------|-------|
|       | Expression     | SD    | Expression       | SD    |
| CT    | 1,169          | 0,117 | 0,486            | 0,087 |
| C3-10 | 0,948          | 0,237 | 1,037            | 0,368 |
| C3-21 | 0,403          | 0,098 | 1,076            | 0,215 |
| C3-22 | 0,598          | 0,181 | 0,548            | 0,120 |
| C3-26 | 1,175          | 0,449 | 0,588            | 0,183 |

CT – control plants; SD – standard deviation; values are mean  $\pm$  SD (n = 3); Expression values were normalized in relation to *Elongation factor 2* reference gene (AK250137.1).

**Table S8** Expression level of *HvIPT* genes in 7 DAP spikes and 10-day-old roots of *ckx1* mutant lines.

|       | CT               |         | C1-22      |         | C1-27      |         | C1-29      |         | C1-34      |         |
|-------|------------------|---------|------------|---------|------------|---------|------------|---------|------------|---------|
|       | Spikes at 7DAP   |         |            |         |            |         |            |         |            |         |
| Gene  | Expression       | SD      | Expression | SD      | Expression | SD      | Expression | SD      | Expression | SD      |
| IPT1  | 1,87903          | 0,18081 | 0,80544    | 0,24339 | 0,69801    | 0,01881 | 0,59121    | 0,12970 | 0,85011    | 0,25722 |
| IPT2  | 0,10476          | 0,05018 | 0,00947    | 0,00124 | 0,00620    | 0,00224 | 0,01299    | 0,00061 | 0,01089    | 0,00687 |
| IPT3  | 0,00056          | 0,00024 | 0,00018    | 0,00023 | 0,00004    | 0,00003 | 0,00011    | 0,00006 | 0,00023    | 0,00042 |
| IPT4  | 0,04248          | 0,04738 | 0,41781    | 0,38422 | 0,09569    | 0,11428 | 0,29192    | 0,09607 | 0,26617    | 0,33849 |
| IPT5  | 0,00100          | 0,00046 | 0,00217    | 0,00093 | 0,00191    | 0,00233 | 0,00350    | 0,00316 | 0,00241    | 0,00143 |
| IPT7  | 0,00350          | 0,00071 | 0,00195    | 0,00049 | 0,00145    | 0,00003 | 0,00207    | 0,00083 | 0,00179    | 0,00057 |
| IPT10 | 0,05474          | 0,00746 | 0,05730    | 0,01439 | 0,05172    | 0,00280 | 0,06285    | 0,01709 | 0,05503    | 0,02169 |
|       | 10-day-old roots |         |            |         |            |         |            |         |            |         |
| IPT1  | 1,53721          | 0,34256 | 1,01228    | 0,19485 | 2,36232    | 1,03016 | 3,81464    | 2,33754 | 2,46394    | 1,91375 |
| IPT2  | 0,00230          | 0,00082 | 0,00512    | 0,00068 | 0,00686    | 0,00396 | 0,00833    | 0,00382 | 0,00657    | 0,00455 |
| IPT3  | 0,00056          | 0,00062 | 0,00273    | 0,00381 | 0,00177    | 0,00002 | 0,00048    | 0,00067 | 0,00218    | 0,00011 |
| IPT4  | 0,00293          | 0,00174 | 0,00264    | 0,00269 | 0,00376    | 0,00246 | 0,00447    | 0,00038 | 0,00366    | 0,00077 |
| IPT5  | 0,02527          | 0,01282 | 0,02057    | 0,01299 | 0,01011    | 0,00469 | 0,00604    | 0,00218 | 0,00848    | 0,00345 |
| IPT7  | 0,00505          | 0,00135 | 0,01416    | 0,00534 | 0,01698    | 0,00127 | 0,01255    | 0,00152 | 0,00985    | 0,00471 |
| IPT10 | 0,13539          | 0,02445 | 0,07090    | 0,03587 | 0,08613    | 0,06274 | 0,03373    | 0,00762 | 0,16337    | 0,09785 |

CT – control plants; SD – standard deviation; values are mean  $\pm$  SD (n = 3); Expression values were normalized in relation to *Elongation factor 2* reference gene (AK250137.1).

**Table S9** Expression level of *HvIPT* genes in 7 DAP spikes and 10-day-old roots of *ckx3* mutant lines.

|       | CT               |        | C3-10      |        | C3-21      |        | C3-22      |        | C3-26      |        |
|-------|------------------|--------|------------|--------|------------|--------|------------|--------|------------|--------|
|       | Spikes at 7DAP   |        |            |        |            |        |            |        |            |        |
| Gene  | Expression       | SD     | Expression | SD     | Expression | SD     | Expression | SD     | Expression | SD     |
| IPT1  | 1,1802           | 0,2057 | 1,1664     | 0,3963 | 0,9852     | 0,2614 | 0,9516     | 0,2806 | 0,8037     | 0,1103 |
| IPT2  | 0,1517           | 0,1232 | 0,1701     | 0,0911 | 0,1672     | 0,0800 | 0,0916     | 0,0234 | 0,0919     | 0,0369 |
| IPT3  | 0,0007           | 0,0002 | 0,0014     | 0,0015 | 0,0045     | 0,0035 | 0,0006     | 0,0001 | 0,0002     | 0,0002 |
| IPT4  | 0,0046           | 0,0027 | 0,0427     | 0,0332 | 0,0140     | 0,0126 | 0,0743     | 0,1049 | 0,1180     | 0,1011 |
| IPT5  | 0,0017           | 0,0019 | 0,0012     | 0,0009 | 0,0047     | 0,0049 | 0,0021     | 0,0016 | 0,0028     | 0,0004 |
| IPT7  | 0,0135           | 0,0105 | 0,1216     | 0,0977 | 0,1562     | 0,1549 | 0,1273     | 0,1193 | 0,0431     | 0,0218 |
| IPT10 | 0,1308           | 0,0201 | 0,1371     | 0,0091 | 0,1132     | 0,0052 | 0,1017     | 0,0367 | 0,0907     | 0,0109 |
|       | 10-day-old roots |        |            |        |            |        |            |        |            |        |
| IPT1  | 7,2658           | 1,9190 | 5,3972     | 1,9946 | 5,6890     | 1,2501 | 6,9698     | 1,0954 | 4,8639     | 0,2985 |
| IPT2  | 0,0790           | 0,0124 | 0,0626     | 0,0235 | 0,0681     | 0,0138 | 0,0534     | 0,0194 | 0,0784     | 0,0151 |
| IPT3  | 0,0414           | 0,0017 | 0,1810     | 0,1416 | 0,0074     | 0,0076 | 0,0040     | 0,0026 | 0,0036     | 0,0003 |
| IPT4  | 0,0074           | 0,0037 | 0,0550     | 0,0639 | 0,0015     | 0,0004 | 0,0013     | 0,0003 | 0,0031     | 0,0011 |
| IPT5  | 0,1314           | 0,0370 | 0,0411     | 0,0302 | 0,1257     | 0,1015 | 0,0326     | 0,0059 | 0,0302     | 0,0195 |
| IPT7  | 0,0210           | 0,0084 | 0,0797     | 0,0777 | 0,0106     | 0,0054 | 0,0060     | 0,0042 | 0,0158     | 0,0080 |
| IPT10 | 0,1308           | 0,0201 | nd         | -      | nd         | -      | nd         | -      | nd         | -      |

CT – control plants; SD – standard deviation; nd – not detected; values are mean  $\pm$  SD (n = 3); Expression values were normalized in relation to *Elongation factor 2* reference gene (AK250137.1).

**Table S10** Selected yield parameters of 7DAP spikes of *ckx1* mutant lines.

|       | No. spikes | SD   | No. grains | SD    | Grain weight [g] | SD   | WTG [g] | SD   |
|-------|------------|------|------------|-------|------------------|------|---------|------|
| CT    | 12,00      | 1,15 | 88,71      | 18,28 | 3,26             | 0,71 | 36,84   | 4,73 |
| C1-22 | 7,80       | 2,68 | 78,20      | 35,45 | 3,04             | 1,40 | 39,35   | 4,86 |
| C1-27 | 10,75      | 5,91 | 141,75     | 77,12 | 4,47             | 3,15 | 29,18   | 6,76 |
| C1-29 | 14,50      | 3,42 | 129,50     | 31,20 | 4,06             | 1,37 | 36,76   | 3,32 |
| C1-34 | 9,89       | 3,26 | 112,89     | 49,25 | 4,38             | 2,19 | 37,59   | 6,06 |

CT – control plants; SD – standard deviation; WTG – weight of thousand grains; values are mean  $\pm$  SD (n = 3)

**Table S11** Selected yield parameters of 7DAP spikes of *ckx3* mutant lines.

| Line  | No. spikes | SD   | No. grains | SD    | Grain weight [g] | SD   | WTG [g] | SD   |
|-------|------------|------|------------|-------|------------------|------|---------|------|
| CT    | 11,67      | 1,51 | 114,50     | 35,48 | 4,59             | 1,44 | 40,16   | 2,75 |
| C3-10 | 17,33      | 5,51 | 98,33      | 14,19 | 3,70             | 0,78 | 37,44   | 3,73 |
| C3-21 | 15,00      | 3,61 | 51,33      | 39,17 | 1,81             | 1,52 | 34,36   | 3,27 |
| C3-22 | 11,67      | 3,21 | 64,00      | 42,51 | 1,99             | 1,36 | 30,55   | 1,74 |
| C3-26 | 16,33      | 2,08 | 62,33      | 23,76 | 1,96             | 0,79 | 32,06   | 6,01 |

CT – control plants; SD – standard deviation; WTG – weight of thousand grains; values are mean  $\pm$  SD (n = 3)

**Table S12** Select morphological characteristics of 10-day-old roots of *ckx1* mutant lines.

| Line  | Length<br>[mm] | SD    | Mass<br>[mg] | SD    | Surface<br>[cm <sup>2</sup> ] | SD   | Diameter<br>[mm] | SD   | Volume<br>[cm <sup>3</sup> ] | SD   | No. tips | SD      |
|-------|----------------|-------|--------------|-------|-------------------------------|------|------------------|------|------------------------------|------|----------|---------|
| CT    | 57,73          | 22,17 | 58,33        | 13,95 | 4,53                          | 0,92 | 0,27             | 0,06 | 0,03                         | 0,01 | 1000,11  | 479,63  |
| C1-22 | 157,23         | 25,82 | 85,00        | 14,89 | 7,42                          | 0,93 | 0,15             | 0,02 | 0,03                         | 0,00 | 2037,71  | 444,26  |
| C1-27 | 183,29         | 64,91 | 94,56        | 15,36 | 8,37                          | 1,99 | 0,15             | 0,04 | 0,03                         | 0,01 | 2672,22  | 1154,99 |
| C1-29 | 79,88          | 35,10 | 65,57        | 8,81  | 4,75                          | 0,94 | 0,21             | 0,05 | 0,02                         | 0,00 | 1137,43  | 711,02  |
| C1-34 | 171,48         | 44,08 | 84,88        | 19,86 | 7,39                          | 1,32 | 0,14             | 0,02 | 0,03                         | 0,00 | 2662,13  | 1038,30 |

CT – control plants; SD – standard deviation; values are mean  $\pm$  SD (n = 7 to 10)

**Table S13** Select morphological characteristics of 10-day-old roots of *ckx3* mutant lines.

| Line  | Length<br>[mm] | SD    | Mass<br>[mg] | SD    | Surface<br>[cm <sup>2</sup> ] | SD   | Diameter<br>[mm] | SD   | Volume<br>[cm <sup>3</sup> ] | SD   | No. tips | SD      |
|-------|----------------|-------|--------------|-------|-------------------------------|------|------------------|------|------------------------------|------|----------|---------|
| CT    | 233,88         | 38,47 | 116,79       | 21,44 | 10,61                         | 1,58 | 0,14             | 0,01 | 0,04                         | 0,01 | 3672,32  | 1044,20 |
| C3-10 | 116,15         | 14,93 | 89,57        | 15,27 | 6,87                          | 1,13 | 0,19             | 0,03 | 0,03                         | 0,01 | 1707,57  | 300,82  |
| C3-21 | 129,67         | 45,18 | 85,00        | 13,52 | 6,75                          | 1,59 | 0,17             | 0,02 | 0,03                         | 0,00 | 2078,33  | 889,76  |
| C3-22 | 155,53         | 35,90 | 77,50        | 11,83 | 7,44                          | 1,32 | 0,15             | 0,02 | 0,03                         | 0,01 | 2543,63  | 411,92  |
| C3-26 | 84,69          | 12,34 | 78,40        | 4,04  | 5,60                          | 0,19 | 0,21             | 0,04 | 0,03                         | 0,01 | 1358,00  | 194,06  |

CT – control plants; SD – standard deviation; values are mean  $\pm$  SD (n = 7 to 10)

**Table S14** Summary of the functional classification of differentially expressed genes identified in the 7 DAP spikes of *ckx1* mutant line C1-22.

| BIN class | Upregulation                                                                            | Number of DEG | Downregulation                                                                                                                                                    | Number of DEG |
|-----------|-----------------------------------------------------------------------------------------|---------------|-------------------------------------------------------------------------------------------------------------------------------------------------------------------|---------------|
|           | Description                                                                             |               | Description                                                                                                                                                       |               |
| 1         | PS; light reaction                                                                      | 3             | PS; light reaction;                                                                                                                                               | 9             |
| 2         | Major CHO metabolism; synthesis;                                                        | 23            | Major CHO metabolism; synthesis;                                                                                                                                  | 11            |
| 3         | Minor CHO metabolism; degradation                                                       | 16            | Minor CHO metabolism; degradation                                                                                                                                 | 1             |
| 4         | Glycolysis                                                                              | 2             | Glycolysis; cytosolic branch                                                                                                                                      | 6             |
| 5         | Fermentation; ADH                                                                       | 0             | Fermentation; aldehyde dehydrogenase                                                                                                                              | 1             |
| 6         | Gluconeogenesis / glyoxylate cycle                                                      | 0             | Gluconeogenesis                                                                                                                                                   | 1             |
| 7         | OPP                                                                                     | 0             | OPP                                                                                                                                                               | 2             |
| 8         | TCA / org transformation; TCA; pyruvate DH.E1                                           | 1             | TCA / org transformation; TCA; pyruvate DH.E1                                                                                                                     | 12            |
| 9         | Mitochondrial electron transport                                                        | 3             | Mitochondrial electron transport / ATP synthesis; NADH-DH; localization not clear                                                                                 | 6             |
| 10        | Cell wall; cellulose synthesis; degradation; modification                               | 7             | Cell wall; precursor synthesis; degradation; modification                                                                                                         | 7             |
| 11        | Lipid metabolism;                                                                       | 6             | Lipid metabolism; FA synthesis and FA elongation                                                                                                                  | 14            |
| 12        | N-metabolism                                                                            | 0             | N-metabolism                                                                                                                                                      | 1             |
| 13        | Amino acid metabolism; synthesis; degradation                                           | 49            | Amino acid metabolism; synthesis; degradation                                                                                                                     | 12            |
| 15        | Metal handling; regulation                                                              | 1             | Metal handling; regulation                                                                                                                                        | 1             |
| 16        | Secondary metabolism;                                                                   | 14            | Secondary metabolism; isoprenoids; carotenoids                                                                                                                    | 4             |
| 17        | Hormone metabolism; cytokinin synthesis-degradation; gibberellin synthesis-degradation; | 31            | Hormone metabolism; auxin; signal transduction, cytokinin synthesis/degradation; brassinosteroid; jasmonate synthesis/degradation; ethylene synthesis/degradation | 19            |
| 18        | Co-factor and vitamine metabolism                                                       | 0             | Co-factor and vitamine metabolism                                                                                                                                 | 1             |
| 19        | Tetrapyrrole synthesis                                                                  | 0             | Tetrapyrrole synthesis                                                                                                                                            | 2             |
| 20        | Stress; abiotic; biotic                                                                 | 5             | Stress                                                                                                                                                            | 10            |
| 21        | Redox                                                                                   | 1             | Redox; thioredoxin; ascorbate and glutathione                                                                                                                     | 7             |
| 22        | Polyamine metabolism                                                                    | 0             | Polyamine metabolism; synthesis                                                                                                                                   | 1             |

|    |                                                                             |    |                                                                              |    |
|----|-----------------------------------------------------------------------------|----|------------------------------------------------------------------------------|----|
|    |                                                                             |    |                                                                              |    |
| 23 | Nucleotide metabolism                                                       | 4  | Nucleotide metabolism;<br>phosphotransfer and<br>pyrophosphatases            | 2  |
| 25 | C1-metabolism                                                               | 0  | C1-metabolism                                                                | 1  |
| 26 | Miscellaneous;<br>peroxidases; dynamin                                      | 10 | Miscellaneous; oxygenases                                                    | 12 |
| 27 | RNA; processing                                                             | 22 | RNA; processing                                                              | 39 |
| 28 | DNA; synthesis; chromatin<br>structure                                      | 10 | DNA; synthesis; chromatin<br>structure                                       | 9  |
| 29 | Protein; aa activation;<br>synthesis; ribosomal<br>protein; 40S subunit S10 | 48 | Protein; aa activation;<br>synthesis; ribosomal protein;                     | 84 |
| 30 | Signaling; light; calcium                                                   | 8  | Signaling; in sugar and nutrient<br>physiology; receptor kinases;<br>calcium | 18 |
| 31 | Cell; organization                                                          | 11 | Cell; organization; cytoskeleton                                             | 17 |
| 33 | Development; unspecified                                                    | 2  | Development; unspecified                                                     | 7  |
| 34 | Transport; p- and v-<br>ATPases; potassium                                  | 10 | Transport; sugars; metals; p-<br>and v-ATPases                               | 21 |
| 35 | Not assigned; no ontology;<br>unknown                                       | 57 | Not assigned; no ontology                                                    | 59 |

**Table S15** Summary of the functional classification of differentially expressed genes identified in the 10-day-old roots of *ckx1* mutant line C1-22.

| <b>BIN<br/>class</b> | <b>Upregulation</b>                                     | <b>Number<br/>of DEG</b> | <b>Downregulation</b>                                | <b>Number<br/>of DEG</b> |
|----------------------|---------------------------------------------------------|--------------------------|------------------------------------------------------|--------------------------|
|                      | Description                                             |                          | Description                                          |                          |
| 1                    | PS; light reaction;<br>photosystem I; photosystem<br>II | 3                        | PS; light reaction; PSII; LHC-<br>II                 | 0                        |
| 2                    | Major CHO metabolism;<br>synthesis; starch              | 1                        | Major CHO metabolism;<br>degradation                 | 6                        |
| 3                    | Minor CHO metabolism;<br>raffinose family;              | 2                        | Minor CHO metabolism;                                | 3                        |
| 4                    | Glycolysis; cytosolic branch                            | 4                        | Glycolysis; cytosolic branch;<br>pyruvate kinase     | 1                        |
| 5                    | Fermentation; ADH                                       | 4                        | Fermentation; aldehyde<br>dehydrogenase              | 0                        |
| 6                    | Gluconeogenesis / glyoxylate<br>cycle                   | 0                        | Gluconeogenesis                                      | 0                        |
| 7                    | OPP                                                     | 0                        | OPP                                                  | 0                        |
| 8                    | TCA / org transformation;<br>succinate dehydrogenase    | 1                        | TCA / org transformation;<br>pyruvate DH.E3          | 1                        |
| 9                    | Mitochondrial electron<br>transport / ATP synthesis;    | 0                        | Mitochondrial electron<br>transport / ATP synthesis; | 1                        |

|    |                                                                                                                                                             |     |                                                                                    |     |
|----|-------------------------------------------------------------------------------------------------------------------------------------------------------------|-----|------------------------------------------------------------------------------------|-----|
|    | NADH-DH; complex I                                                                                                                                          |     | NADH-DH; localization not clear                                                    |     |
| 10 | Cell wall; synthesis; degradation                                                                                                                           | 10  | Cell wall; precursor synthesis                                                     | 6   |
| 11 | Lipid metabolism; FA synthesis; lipid degradation                                                                                                           | 9   | Lipid metabolism; FA synthesis and FA elongation                                   | 10  |
| 12 | N-metabolism                                                                                                                                                | 1   | N-metabolism                                                                       | 1   |
| 13 | Amino acid metabolism; synthesis                                                                                                                            | 6   | Amino acid metabolism; synthesis                                                   | 5   |
| 15 | Metal handling; regulation                                                                                                                                  | 0   | Metal handling; regulation                                                         | 0   |
| 16 | Secondary metabolism; phenylpropanoids                                                                                                                      | 14  | Secondary metabolism; isoprenoids; carotenoids                                     | 6   |
| 17 | Hormone metabolism; abscisic acid synthesis/degradation; jasmonate synthesis/degradation; auxin synthesis/degradation; salicylic acid synthesis degradation | 22  | Hormone metabolism; cytokinin synthesis / degradation; brassinosteroid             | 8   |
| 18 | Co-factor and vitamine metabolism                                                                                                                           | 1   | Co-factor and vitamine metabolism                                                  | 3   |
| 20 | Stress; abiotic; biotic                                                                                                                                     | 26  | Stress; biotic                                                                     | 19  |
| 21 | Redox; heme                                                                                                                                                 | 1   | Redox; dismutases and catalases                                                    | 2   |
| 22 | Polyamine metabolism                                                                                                                                        | 0   | Polyamine metabolism;                                                              | 0   |
| 23 | Nucleotide metabolism                                                                                                                                       | 3   | Nucleotide metabolism;                                                             | 2   |
| 25 | C1-metabolism                                                                                                                                               | 0   | C1-metabolism                                                                      | 0   |
| 26 | Miscellaneous;                                                                                                                                              | 33  | Miscellaneous;                                                                     | 13  |
| 27 | RNA; processing; regulation of transcription; RNA binding                                                                                                   | 43  | RNA; processing; splicing                                                          | 55  |
| 28 | DNA; synthesis; repair                                                                                                                                      | 12  | DNA; synthesis; chromatin structure                                                | 17  |
| 29 | Protein; degradation; folding; glycosylation                                                                                                                | 42  | Protein; synthesis; initiation                                                     | 45  |
| 30 | Signaling; receptor kinases; calcium; G-proteins                                                                                                            | 26  | Signaling; receptor kinases                                                        | 26  |
| 31 | Cell; organization; vesicle transport                                                                                                                       | 10  | Cell; organization                                                                 | 16  |
| 33 | Development; unspecified                                                                                                                                    | 12  | Development; unspecified                                                           | 10  |
| 34 | Transport                                                                                                                                                   | 31  | Transport; metabolite transporters at the mitochondrial membrane; ABC transporters | 22  |
| 35 | Not assigned; no ontology; unknown                                                                                                                          | 113 | Not assigned; no ontology; unknown                                                 | 107 |

**Table S16** Summary of the functional classification of differentially expressed genes identified in the 7 DAP spikes of *ckx3* mutant line C3-21.

| <b>BIN class</b> | <b>Upregulation</b>                                                                                | <b>Number of DEG</b> | <b>Downregulation</b>                                                                 | <b>Number of DEG</b> |
|------------------|----------------------------------------------------------------------------------------------------|----------------------|---------------------------------------------------------------------------------------|----------------------|
|                  | Description                                                                                        |                      | Description                                                                           |                      |
| 1                | PS; light reaction; photosystem II; PSII polypeptide subunits                                      | 8                    | PS; light reaction; photosystem II; LHC-II                                            | 8                    |
| 2                | Major CHO metabolism; synthesis; starch                                                            | 10                   | Major CHO metabolism; synthesis; starch                                               | 6                    |
| 3                | Minor CHO metabolism; others                                                                       | 5                    | Minor CHO metabolism; callose                                                         | 6                    |
| 4                | Glycolysis; cytosolic branch; phosphoglycerate mutase                                              | 7                    | Glycolysis; cytosolic branch; phosphofructokinase                                     | 5                    |
| 6                | Gluconeogenesis / glyoxylate cycle                                                                 | 2                    | Gluconeogenesis                                                                       | 0                    |
| 7                | OPP                                                                                                | 0                    | OPP                                                                                   | 1                    |
| 8                | TCA / org transformation; IDH                                                                      | 7                    | TCA / org transformation; IDH                                                         | 3                    |
| 9                | Mitochondrial electron transport / ATP synthesis;                                                  | 2                    | Mitochondrial electron transport / ATP synthesis;                                     | 1                    |
| 10               | Cell wall; degradation                                                                             | 9                    | Cell wall; cellulose synthesis                                                        | 7                    |
| 11               | Lipid metabolism;                                                                                  | 13                   | Lipid metabolism; FA synthesis and FA elongation                                      | 7                    |
| 13               | Amino acid metabolism; synthesis                                                                   | 12                   | Amino acid metabolism; synthesis                                                      | 30                   |
| 15               | Metal handling; regulation                                                                         | 1                    |                                                                                       | 0                    |
| 16               | Secondary metabolism                                                                               | 8                    | Secondary metabolism;                                                                 | 4                    |
| 17               | Hormone metabolism; auxin; induced-regulated-responsive-activated; cytokinin synthesis/degradation | 23                   | Hormone metabolism; cytokinin synthesis / degradation; ethylene synthesis/degradation | 15                   |
| 18               | Co-factor and vitamine metabolism                                                                  | 0                    | Co-factor and vitamine metabolism                                                     | 3                    |
| 19               | Tetrapyrrole synthesis                                                                             | 0                    | Tetrapyrrole synthesis; glu-tRNA reductase                                            | 5                    |
| 20               | Stress;                                                                                            | 26                   | Stress; abiotic                                                                       | 10                   |
| 21               | Redox; heme                                                                                        | 1                    | Redox; thioredoxin                                                                    | 7                    |
| 22               | Polyamine metabolism; synthesis                                                                    | 1                    | Polyamine metabolism; synthesis                                                       | 1                    |
| 23               | Nucleotide metabolism                                                                              | 3                    | Nucleotide metabolism;                                                                | 2                    |
| 24               | Biodegradation of Xenobiotics                                                                      | 1                    |                                                                                       | 1                    |

|    |                                                         |    |                                                                                 |    |
|----|---------------------------------------------------------|----|---------------------------------------------------------------------------------|----|
| 25 | C1-metabolism                                           | 0  | C1-metabolism                                                                   | 1  |
| 26 | Miscellaneous; UDP glucosyl and glucoronyl transferases | 22 | Miscellaneous; UDP glucosyl and glucoronyl transferases                         | 18 |
| 27 | RNA; processing;                                        | 32 | RNA; processing;                                                                | 35 |
| 28 | DNA; synthesis; chromatin structure                     | 8  | DNA; synthesis; chromatin structure                                             | 7  |
| 29 | Protein; aa activation; synthesis; degradation          | 45 | Protein; aa activation; synthesis                                               | 68 |
| 30 | Signaling; receptor kinases;                            | 6  | Signaling; receptor kinases                                                     | 15 |
| 31 | Cell;                                                   | 6  | Cell; organization                                                              | 19 |
| 33 | Development; late embryogenesis                         | 9  | Development; unspecified                                                        | 6  |
| 34 | Transport; metal                                        | 15 | Transport; sugars; metabolite transporters at the mitochondrial membrane; metal | 22 |
| 35 | Not assigned; no ontology; unknown                      | 99 | Not assigned; no ontology; unknown                                              | 14 |

**Table S17** Summary of the functional classification of differentially expressed genes identified in the 10-day-old roots of *ckx3* mutant line C3-21.

| <b>BIN class</b> | <b>Upregulation</b>                                           | <b>Number of DEG</b> | <b>Downregulation</b>                             | <b>Number of DEG</b> |
|------------------|---------------------------------------------------------------|----------------------|---------------------------------------------------|----------------------|
|                  | Description                                                   |                      | Description                                       |                      |
| 1                | PS; light reaction; photosystem II; PSII polypeptide subunits | 1                    | PS; light reaction; photosystem II; LHC-II        | 0                    |
| 2                | Major CHO metabolism; synthesis; starch                       | 0                    | Major CHO metabolism; synthesis; starch           | 2                    |
| 3                | Minor CHO metabolism; others                                  | 1                    | Minor CHO metabolism; callose                     | 2                    |
| 4                | Glycolysis; cytosolic branch; phosphoglycerate mutase         | 1                    | Glycolysis; cytosolic branch; phosphofructokinase | 0                    |
| 5                | Fermentation; ADH                                             | 0                    | Fermentation; aldehyde dehydrogenase              | 0                    |
| 6                | Gluconeogenesis / glyoxylate cycle                            | 0                    | Gluconeogenesis                                   | 0                    |
| 7                | OPP; oxidative PP                                             | 1                    |                                                   | 0                    |
| 8                | TCA / org transformation;                                     | 3                    | TCA / org transformation; IDH                     | 1                    |
| 9                | Mitochondrial electron transport / ATP synthesis;             | 2                    | Mitochondrial electron transport / ATP synthesis; | 1                    |
| 10               | Cell wall; degradation                                        | 3                    | Cell wall; degradation                            | 2                    |

|    |                                                                                                                                                                               |    |                                                               |    |
|----|-------------------------------------------------------------------------------------------------------------------------------------------------------------------------------|----|---------------------------------------------------------------|----|
| 11 | Lipid metabolism; FA synthesis and elongation                                                                                                                                 | 9  | Lipid metabolism; FA synthesis and FA elongation; degradation | 2  |
| 12 | N-metabolism                                                                                                                                                                  | 0  | N-metabolism                                                  | 1  |
| 13 | Amino acid metabolism; synthesis                                                                                                                                              | 5  | Amino acid metabolism; synthesis                              | 2  |
| 15 | Metal handling; regulation                                                                                                                                                    | 0  | Metal handling; regulation                                    | 2  |
| 16 | Secondary metabolism; isoprenoids                                                                                                                                             | 9  | Secondary metabolism; phenylpropanoids                        | 10 |
| 17 | Hormone metabolism; auxin; induced-regulated-responsive-activated; brassinosteroid signal transduction; jasmonate synthesis/degradation; salicylic acid synthesis/degradation | 13 | Hormone metabolism; auxin; synthesis / degradation;           | 4  |
| 18 | Co-factor and vitamine metabolism                                                                                                                                             | 2  | Co-factor and vitamine metabolism                             | 6  |
| 19 | Tetrapyrrole synthesis                                                                                                                                                        | 0  | Tetrapyrrole synthesis; glu-tRNA reductase                    | 0  |
| 20 | Stress; biotic; abiotic                                                                                                                                                       | 16 | Stress; biotic; abiotic                                       | 10 |
| 21 | Redox                                                                                                                                                                         | 0  | Redox; thioredoxin                                            | 3  |
| 22 | Polyamine metabolism; synthesis                                                                                                                                               | 1  | Polyamine metabolism; synthesis                               | 0  |
| 23 | Nucleotide metabolism                                                                                                                                                         | 0  | Nucleotide metabolism; degradation                            | 4  |
| 25 | C1-metabolism                                                                                                                                                                 | 1  | C1-metabolism                                                 | 0  |
| 26 | Miscellaneous; UDP glucosyl and glucoronyl transferases                                                                                                                       | 30 | Miscellaneous; cytochrome P450                                | 8  |
| 27 | RNA; processing;                                                                                                                                                              | 42 | RNA; processing;                                              | 35 |
| 28 | DNA; synthesis; chromatin structure                                                                                                                                           | 7  | DNA; synthesis; chromatin structure                           | 15 |
| 29 | Protein; aa activation; synthesis                                                                                                                                             | 39 | Protein; aa activation; synthesis                             | 40 |
| 30 | Signaling; in sugar and nutrient physiology                                                                                                                                   | 32 | Signaling; in sugar and nutrient physiology; phosphorelay     | 22 |
| 31 | Cell; organisation                                                                                                                                                            | 15 | Cell; organization, devision; cell cycle                      | 9  |
| 33 | Development; multitarget                                                                                                                                                      | 3  | Development; squamosa promoter binding like (SPL)             | 8  |
| 34 | Transport; p- and v-ATPases                                                                                                                                                   | 32 | Transport; metal                                              | 14 |
| 35 | Not assigned; no ontology; unknown                                                                                                                                            | 72 | Not assigned; no ontology; unknown                            | 85 |
